# Supplementary material for: Novel non-spherical deltahedra in trirhenaborane structures
Source: Royal Society of Chemistry journal article supplement (doi:10.1039/c6nj01922f), 2016-01-01
Supplement: c6nj01922f1.pdf [file c6nj01922f1.pdf]

## Supporting information

# Novel Non-spherical Deltahedra in Trirhenaborane Structures

Amr A. A. Attia,<sup>1</sup> Alexandru Lupan,\*<sup>1</sup> and R. Bruce King\*<sup>2</sup>

<sup>1</sup> *Department of Chemistry, Faculty of Chemistry and Chemical Engineering, Babeş-Bolyai University, Cluj-Napoca, Romania*

<sup>2</sup> *Department of Chemistry and Center for Computational Quantum Chemistry, University of Georgia, Athens, Georgia, 30602, USA*

Table S1A. Initial Cp<sub>3</sub>Re<sub>3</sub>B<sub>2</sub>H<sub>2</sub> structures.

Table S1B. Distance table for the lowest-lying Cp<sub>3</sub>Re<sub>3</sub>B<sub>2</sub>H<sub>2</sub> structures.

Table S2A. Initial Cp<sub>3</sub>Re<sub>3</sub>B<sub>3</sub>H<sub>3</sub> structures.

Table S2B. Distance table for the lowest-lying Cp<sub>3</sub>Re<sub>3</sub>B<sub>3</sub>H<sub>3</sub> structures.

Table S2C. Energy ranking for all of the Cp<sub>3</sub>Re<sub>3</sub>B<sub>3</sub>H<sub>3</sub> optimized structures.

Table S3A. Initial Cp<sub>3</sub>Re<sub>3</sub>B<sub>4</sub>H<sub>4</sub> structures.

Table S3B. Distance table for the lowest-lying Cp<sub>3</sub>Re<sub>3</sub>B<sub>4</sub>H<sub>4</sub> structures.

Table S3C. Energy ranking for all of the Cp<sub>3</sub>Re<sub>3</sub>B<sub>4</sub>H<sub>4</sub> optimized structures.

Table S4A. Initial Cp<sub>3</sub>Re<sub>3</sub>B<sub>5</sub>H<sub>5</sub> structures.

Table S4B. Distance table for the lowest-lying Cp<sub>3</sub>Re<sub>3</sub>B<sub>5</sub>H<sub>5</sub> structures.

Table S4C. Energy ranking for all of the Cp<sub>3</sub>Re<sub>3</sub>B<sub>5</sub>H<sub>5</sub> optimized structures.

Table S5A. Initial Cp<sub>3</sub>Re<sub>3</sub>B<sub>6</sub>H<sub>6</sub> structures.

Table S5B. Distance table for the lowest-lying Cp<sub>3</sub>Re<sub>3</sub>B<sub>6</sub>H<sub>6</sub> structures.

Table S5C. Energy ranking for all of the Cp<sub>3</sub>Re<sub>3</sub>B<sub>6</sub>H<sub>6</sub> optimized structures.

Table S6A. Initial Cp<sub>3</sub>Re<sub>3</sub>B<sub>7</sub>H<sub>7</sub> structures.

Table S6B. Distance table for the lowest-lying Cp<sub>3</sub>Re<sub>3</sub>B<sub>7</sub>H<sub>7</sub> structures.

Table S6C. Energy ranking for all of the Cp<sub>3</sub>Re<sub>3</sub>B<sub>7</sub>H<sub>7</sub> optimized structures.

Table S7A. Initial Cp<sub>3</sub>Re<sub>3</sub>B<sub>8</sub>H<sub>8</sub> structures.

Table S7B. Distance table for the lowest-lying Cp<sub>3</sub>Re<sub>3</sub>B<sub>8</sub>H<sub>8</sub> structures.

Table S7C. Energy ranking for all of the Cp<sub>3</sub>Re<sub>3</sub>B<sub>8</sub>H<sub>8</sub> optimized structures.

Table S8A. Initial Cp<sub>3</sub>Re<sub>3</sub>B<sub>9</sub>H<sub>9</sub> structures

Table S8B. Distance table for the lowest-lying Cp<sub>3</sub>Re<sub>3</sub>B<sub>9</sub>H<sub>9</sub> structures.

Table S8C. Energy ranking for all of the Cp<sub>3</sub>Re<sub>3</sub>B<sub>9</sub>H<sub>9</sub> optimized structures.

Complete Gaussian09 Reference (reference 39).

Gaussian 09, Revision A.02,

M. J. Frisch, G. W. Trucks, H. B. Schlegel, G. E. Scuseria, M. A. Robb, J. R. Cheeseman, G. Scalmani, V. Barone, B. Mennucci, G. A. Petersson, H. Nakatsuji, M. Caricato, X. Li, H. P. Hratchian, A. F. Izmaylov, J. Bloino, G. Zheng, J. L. Sonnenberg, M. Hada, M. Ehara, K. Toyota, R. Fukuda, J. Hasegawa, M. Ishida, T. Nakajima, Y. Honda, O. Kitao, H. Nakai, T. Vreven, J. A. Montgomery, Jr., J. E. Peralta, F. Ogliaro, M. Bearpark, J. J. Heyd, E. Brothers, K. N. Kudin, V. N. Staroverov, R. Kobayashi, J. Normand, K. Raghavachari, A. Rendell, J. C. Burant, S. S. Iyengar, J. Tomasi, M. Cossi, N. Rega, J. M. Millam, M. Klene, J. E. Knox, J. B. Cross, V. Bakken, C. Adamo, J. Jaramillo, R. Gomperts, R. E. Stratmann, O. Yazyev, A. J. Austin, R. Cammi, C. Pomelli, J. W. Ochterski, R. L. Martin, K. Morokuma, V. G. Zakrzewski, G. A. Voth, P. Salvador, J. J. Dannenberg, S. Dapprich, A. D. Daniels, O. Farkas, J. B. Foresman, J. V. Ortiz, J. Cioslowski, and D. J. Fox, Gaussian, Inc., Wallingford CT, 2009.

Table S1A. Initial  $\text{Cp}_3\text{Re}_3\text{B}_2\text{H}_2$  structures, 3 structures.

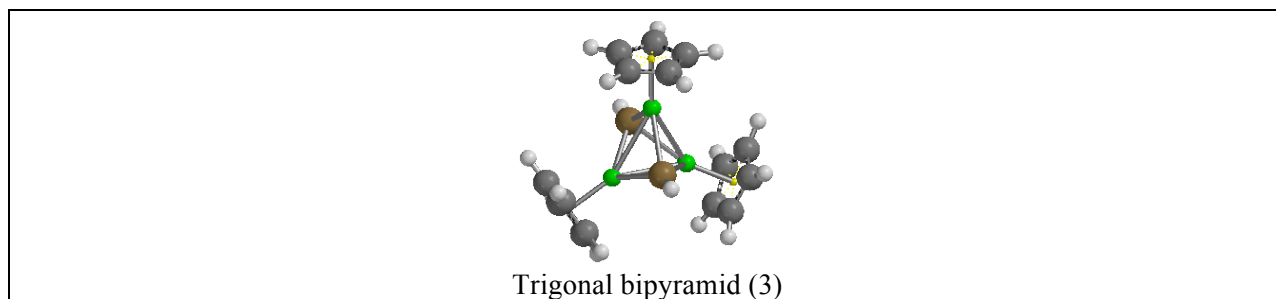

Table S1B. Distance table for the lowest-lying  $\text{Cp}_3\text{Re}_3\text{B}_2\text{H}_2$  structures after M06L/6-311G(d,p) optimization. Included are the ZPcorrected E (a.u.), relative energy (kcal/mol) and symmetry. For clarity only the atoms forming the cluster framework are presented.

| 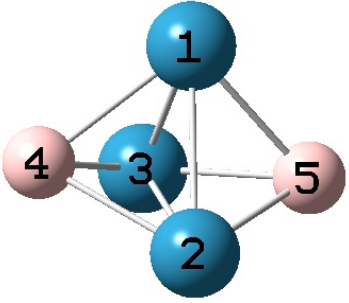 <p><b>1. -866.441412 0.0 C<sub>2v</sub></b></p>  | <table border="1"> <thead> <tr> <th></th> <th>1</th> <th>2</th> <th>3</th> <th>4</th> <th>5</th> </tr> </thead> <tbody> <tr> <td>1 Re</td> <td>0.000000</td> <td></td> <td></td> <td></td> <td></td> </tr> <tr> <td>2 Re</td> <td>2.460308</td> <td>0.000000</td> <td></td> <td></td> <td></td> </tr> <tr> <td>3 Re</td> <td>2.405719</td> <td>2.826816</td> <td>0.000000</td> <td></td> <td></td> </tr> <tr> <td>4 B</td> <td>2.178413</td> <td>2.190675</td> <td>2.161148</td> <td>0.000000</td> <td></td> </tr> <tr> <td>5 B</td> <td>2.178156</td> <td>2.191866</td> <td>2.156977</td> <td>3.162801</td> <td>0.000000</td> </tr> </tbody> </table> |          | 1        | 2        | 3        | 4 | 5 | 1 Re | 0.000000 |  |  |  |  | 2 Re | 2.460308 | 0.000000 |  |  |  | 3 Re | 2.405719 | 2.826816 | 0.000000 |  |  | 4 B | 2.178413 | 2.190675 | 2.161148 | 0.000000 |  | 5 B  | 2.178156 | 2.191866 | 2.156977 | 3.162801 | 0.000000 |
|------------------------------------------------------------------------------------------------------------------------------------|--------------------------------------------------------------------------------------------------------------------------------------------------------------------------------------------------------------------------------------------------------------------------------------------------------------------------------------------------------------------------------------------------------------------------------------------------------------------------------------------------------------------------------------------------------------------------------------------------------------------------------------------------------|----------|----------|----------|----------|---|---|------|----------|--|--|--|--|------|----------|----------|--|--|--|------|----------|----------|----------|--|--|-----|----------|----------|----------|----------|--|------|----------|----------|----------|----------|----------|
|                                                                                                                                    | 1                                                                                                                                                                                                                                                                                                                                                                                                                                                                                                                                                                                                                                                      | 2        | 3        | 4        | 5        |   |   |      |          |  |  |  |  |      |          |          |  |  |  |      |          |          |          |  |  |     |          |          |          |          |  |      |          |          |          |          |          |
| 1 Re                                                                                                                               | 0.000000                                                                                                                                                                                                                                                                                                                                                                                                                                                                                                                                                                                                                                               |          |          |          |          |   |   |      |          |  |  |  |  |      |          |          |  |  |  |      |          |          |          |  |  |     |          |          |          |          |  |      |          |          |          |          |          |
| 2 Re                                                                                                                               | 2.460308                                                                                                                                                                                                                                                                                                                                                                                                                                                                                                                                                                                                                                               | 0.000000 |          |          |          |   |   |      |          |  |  |  |  |      |          |          |  |  |  |      |          |          |          |  |  |     |          |          |          |          |  |      |          |          |          |          |          |
| 3 Re                                                                                                                               | 2.405719                                                                                                                                                                                                                                                                                                                                                                                                                                                                                                                                                                                                                                               | 2.826816 | 0.000000 |          |          |   |   |      |          |  |  |  |  |      |          |          |  |  |  |      |          |          |          |  |  |     |          |          |          |          |  |      |          |          |          |          |          |
| 4 B                                                                                                                                | 2.178413                                                                                                                                                                                                                                                                                                                                                                                                                                                                                                                                                                                                                                               | 2.190675 | 2.161148 | 0.000000 |          |   |   |      |          |  |  |  |  |      |          |          |  |  |  |      |          |          |          |  |  |     |          |          |          |          |  |      |          |          |          |          |          |
| 5 B                                                                                                                                | 2.178156                                                                                                                                                                                                                                                                                                                                                                                                                                                                                                                                                                                                                                               | 2.191866 | 2.156977 | 3.162801 | 0.000000 |   |   |      |          |  |  |  |  |      |          |          |  |  |  |      |          |          |          |  |  |     |          |          |          |          |  |      |          |          |          |          |          |
|  <p><b>2. -866.436285 +3.2 C<sub>s</sub></b></p> | <table border="1"> <thead> <tr> <th></th> <th>1</th> <th>2</th> <th>3</th> <th>4</th> <th>5</th> </tr> </thead> <tbody> <tr> <td>1 B</td> <td>0.000000</td> <td></td> <td></td> <td></td> <td></td> </tr> <tr> <td>2 Re</td> <td>2.275357</td> <td>0.000000</td> <td></td> <td></td> <td></td> </tr> <tr> <td>3 Re</td> <td>2.151040</td> <td>2.677748</td> <td>0.000000</td> <td></td> <td></td> </tr> <tr> <td>4 B</td> <td>3.168933</td> <td>2.045773</td> <td>2.088891</td> <td>0.000000</td> <td></td> </tr> <tr> <td>5 Re</td> <td>2.141511</td> <td>2.462896</td> <td>2.444130</td> <td>3.501942</td> <td>0.000000</td> </tr> </tbody> </table> |          | 1        | 2        | 3        | 4 | 5 | 1 B  | 0.000000 |  |  |  |  | 2 Re | 2.275357 | 0.000000 |  |  |  | 3 Re | 2.151040 | 2.677748 | 0.000000 |  |  | 4 B | 3.168933 | 2.045773 | 2.088891 | 0.000000 |  | 5 Re | 2.141511 | 2.462896 | 2.444130 | 3.501942 | 0.000000 |
|                                                                                                                                    | 1                                                                                                                                                                                                                                                                                                                                                                                                                                                                                                                                                                                                                                                      | 2        | 3        | 4        | 5        |   |   |      |          |  |  |  |  |      |          |          |  |  |  |      |          |          |          |  |  |     |          |          |          |          |  |      |          |          |          |          |          |
| 1 B                                                                                                                                | 0.000000                                                                                                                                                                                                                                                                                                                                                                                                                                                                                                                                                                                                                                               |          |          |          |          |   |   |      |          |  |  |  |  |      |          |          |  |  |  |      |          |          |          |  |  |     |          |          |          |          |  |      |          |          |          |          |          |
| 2 Re                                                                                                                               | 2.275357                                                                                                                                                                                                                                                                                                                                                                                                                                                                                                                                                                                                                                               | 0.000000 |          |          |          |   |   |      |          |  |  |  |  |      |          |          |  |  |  |      |          |          |          |  |  |     |          |          |          |          |  |      |          |          |          |          |          |
| 3 Re                                                                                                                               | 2.151040                                                                                                                                                                                                                                                                                                                                                                                                                                                                                                                                                                                                                                               | 2.677748 | 0.000000 |          |          |   |   |      |          |  |  |  |  |      |          |          |  |  |  |      |          |          |          |  |  |     |          |          |          |          |  |      |          |          |          |          |          |
| 4 B                                                                                                                                | 3.168933                                                                                                                                                                                                                                                                                                                                                                                                                                                                                                                                                                                                                                               | 2.045773 | 2.088891 | 0.000000 |          |   |   |      |          |  |  |  |  |      |          |          |  |  |  |      |          |          |          |  |  |     |          |          |          |          |  |      |          |          |          |          |          |
| 5 Re                                                                                                                               | 2.141511                                                                                                                                                                                                                                                                                                                                                                                                                                                                                                                                                                                                                                               | 2.462896 | 2.444130 | 3.501942 | 0.000000 |   |   |      |          |  |  |  |  |      |          |          |  |  |  |      |          |          |          |  |  |     |          |          |          |          |  |      |          |          |          |          |          |

Table S2A. Initial  $\text{Cp}_3\text{Re}_3\text{B}_3\text{H}_3$  structures, 6 structures.

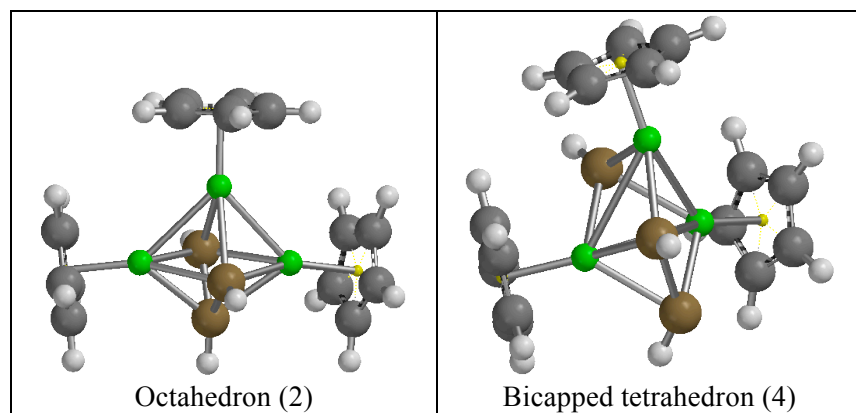

Table S2B. Distance table for the lowest-lying  $\text{Cp}_3\text{Re}_3\text{B}_3\text{H}_3$  structures after M06L/6-311G(d,p) optimization. Included are the ZPcorrected E (a.u.), relative energy (kcal/mol) and symmetry. For clarity only the atoms forming the cluster framework are presented.

| 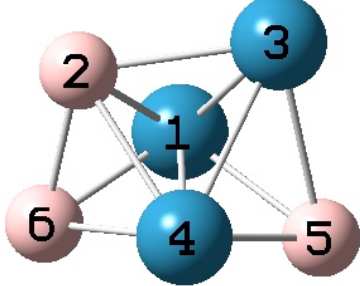 <p>1. -891.9534200 0.0 (<math>C_s</math>)</p>      | <table border="1"> <thead> <tr> <th></th> <th>1</th> <th>2</th> <th>3</th> <th>4</th> <th>5</th> </tr> </thead> <tbody> <tr> <td>1 Re</td> <td>0.000000</td> <td></td> <td></td> <td></td> <td></td> </tr> <tr> <td>2 B</td> <td>2.303838</td> <td>0.000000</td> <td></td> <td></td> <td></td> </tr> <tr> <td>3 Re</td> <td>2.445662</td> <td>2.136284</td> <td>0.000000</td> <td></td> <td></td> </tr> <tr> <td>4 Re</td> <td>2.907780</td> <td>2.221371</td> <td>2.398353</td> <td>0.000000</td> <td></td> </tr> <tr> <td>5 B</td> <td>2.175838</td> <td>3.219497</td> <td>2.297883</td> <td>2.129146</td> <td>0.000000</td> </tr> <tr> <td>6 B</td> <td>2.087477</td> <td>1.829685</td> <td>3.243648</td> <td>2.124336</td> <td>2.927222</td> </tr> </tbody> </table> |          | 1        | 2        | 3        | 4 | 5 | 1 Re | 0.000000 |  |  |  |  | 2 B  | 2.303838 | 0.000000 |  |  |  | 3 Re | 2.445662 | 2.136284 | 0.000000 |  |  | 4 Re | 2.907780 | 2.221371 | 2.398353 | 0.000000 |  | 5 B | 2.175838 | 3.219497 | 2.297883 | 2.129146 | 0.000000 | 6 B  | 2.087477 | 1.829685 | 3.243648 | 2.124336 | 2.927222 |
|--------------------------------------------------------------------------------------------------------------------------------------|--------------------------------------------------------------------------------------------------------------------------------------------------------------------------------------------------------------------------------------------------------------------------------------------------------------------------------------------------------------------------------------------------------------------------------------------------------------------------------------------------------------------------------------------------------------------------------------------------------------------------------------------------------------------------------------------------------------------------------------------------------------------------|----------|----------|----------|----------|---|---|------|----------|--|--|--|--|------|----------|----------|--|--|--|------|----------|----------|----------|--|--|------|----------|----------|----------|----------|--|-----|----------|----------|----------|----------|----------|------|----------|----------|----------|----------|----------|
|                                                                                                                                      | 1                                                                                                                                                                                                                                                                                                                                                                                                                                                                                                                                                                                                                                                                                                                                                                        | 2        | 3        | 4        | 5        |   |   |      |          |  |  |  |  |      |          |          |  |  |  |      |          |          |          |  |  |      |          |          |          |          |  |     |          |          |          |          |          |      |          |          |          |          |          |
| 1 Re                                                                                                                                 | 0.000000                                                                                                                                                                                                                                                                                                                                                                                                                                                                                                                                                                                                                                                                                                                                                                 |          |          |          |          |   |   |      |          |  |  |  |  |      |          |          |  |  |  |      |          |          |          |  |  |      |          |          |          |          |  |     |          |          |          |          |          |      |          |          |          |          |          |
| 2 B                                                                                                                                  | 2.303838                                                                                                                                                                                                                                                                                                                                                                                                                                                                                                                                                                                                                                                                                                                                                                 | 0.000000 |          |          |          |   |   |      |          |  |  |  |  |      |          |          |  |  |  |      |          |          |          |  |  |      |          |          |          |          |  |     |          |          |          |          |          |      |          |          |          |          |          |
| 3 Re                                                                                                                                 | 2.445662                                                                                                                                                                                                                                                                                                                                                                                                                                                                                                                                                                                                                                                                                                                                                                 | 2.136284 | 0.000000 |          |          |   |   |      |          |  |  |  |  |      |          |          |  |  |  |      |          |          |          |  |  |      |          |          |          |          |  |     |          |          |          |          |          |      |          |          |          |          |          |
| 4 Re                                                                                                                                 | 2.907780                                                                                                                                                                                                                                                                                                                                                                                                                                                                                                                                                                                                                                                                                                                                                                 | 2.221371 | 2.398353 | 0.000000 |          |   |   |      |          |  |  |  |  |      |          |          |  |  |  |      |          |          |          |  |  |      |          |          |          |          |  |     |          |          |          |          |          |      |          |          |          |          |          |
| 5 B                                                                                                                                  | 2.175838                                                                                                                                                                                                                                                                                                                                                                                                                                                                                                                                                                                                                                                                                                                                                                 | 3.219497 | 2.297883 | 2.129146 | 0.000000 |   |   |      |          |  |  |  |  |      |          |          |  |  |  |      |          |          |          |  |  |      |          |          |          |          |  |     |          |          |          |          |          |      |          |          |          |          |          |
| 6 B                                                                                                                                  | 2.087477                                                                                                                                                                                                                                                                                                                                                                                                                                                                                                                                                                                                                                                                                                                                                                 | 1.829685 | 3.243648 | 2.124336 | 2.927222 |   |   |      |          |  |  |  |  |      |          |          |  |  |  |      |          |          |          |  |  |      |          |          |          |          |  |     |          |          |          |          |          |      |          |          |          |          |          |
|  <p>2. -891.9346589 +11.8 <math>C_s</math></p>      | <table border="1"> <thead> <tr> <th></th> <th>1</th> <th>2</th> <th>3</th> <th>4</th> <th>5</th> </tr> </thead> <tbody> <tr> <td>1 Re</td> <td>0.000000</td> <td></td> <td></td> <td></td> <td></td> </tr> <tr> <td>2 Re</td> <td>2.482917</td> <td>0.000000</td> <td></td> <td></td> <td></td> </tr> <tr> <td>3 Re</td> <td>2.499460</td> <td>2.740271</td> <td>0.000000</td> <td></td> <td></td> </tr> <tr> <td>4 B</td> <td>2.236235</td> <td>2.222618</td> <td>2.228692</td> <td>0.000000</td> <td></td> </tr> <tr> <td>5 B</td> <td>2.154828</td> <td>3.571428</td> <td>2.034252</td> <td>1.860962</td> <td>0.000000</td> </tr> <tr> <td>6 B</td> <td>2.144822</td> <td>2.037547</td> <td>3.583049</td> <td>1.862272</td> <td>3.157274</td> </tr> </tbody> </table> |          | 1        | 2        | 3        | 4 | 5 | 1 Re | 0.000000 |  |  |  |  | 2 Re | 2.482917 | 0.000000 |  |  |  | 3 Re | 2.499460 | 2.740271 | 0.000000 |  |  | 4 B  | 2.236235 | 2.222618 | 2.228692 | 0.000000 |  | 5 B | 2.154828 | 3.571428 | 2.034252 | 1.860962 | 0.000000 | 6 B  | 2.144822 | 2.037547 | 3.583049 | 1.862272 | 3.157274 |
|                                                                                                                                      | 1                                                                                                                                                                                                                                                                                                                                                                                                                                                                                                                                                                                                                                                                                                                                                                        | 2        | 3        | 4        | 5        |   |   |      |          |  |  |  |  |      |          |          |  |  |  |      |          |          |          |  |  |      |          |          |          |          |  |     |          |          |          |          |          |      |          |          |          |          |          |
| 1 Re                                                                                                                                 | 0.000000                                                                                                                                                                                                                                                                                                                                                                                                                                                                                                                                                                                                                                                                                                                                                                 |          |          |          |          |   |   |      |          |  |  |  |  |      |          |          |  |  |  |      |          |          |          |  |  |      |          |          |          |          |  |     |          |          |          |          |          |      |          |          |          |          |          |
| 2 Re                                                                                                                                 | 2.482917                                                                                                                                                                                                                                                                                                                                                                                                                                                                                                                                                                                                                                                                                                                                                                 | 0.000000 |          |          |          |   |   |      |          |  |  |  |  |      |          |          |  |  |  |      |          |          |          |  |  |      |          |          |          |          |  |     |          |          |          |          |          |      |          |          |          |          |          |
| 3 Re                                                                                                                                 | 2.499460                                                                                                                                                                                                                                                                                                                                                                                                                                                                                                                                                                                                                                                                                                                                                                 | 2.740271 | 0.000000 |          |          |   |   |      |          |  |  |  |  |      |          |          |  |  |  |      |          |          |          |  |  |      |          |          |          |          |  |     |          |          |          |          |          |      |          |          |          |          |          |
| 4 B                                                                                                                                  | 2.236235                                                                                                                                                                                                                                                                                                                                                                                                                                                                                                                                                                                                                                                                                                                                                                 | 2.222618 | 2.228692 | 0.000000 |          |   |   |      |          |  |  |  |  |      |          |          |  |  |  |      |          |          |          |  |  |      |          |          |          |          |  |     |          |          |          |          |          |      |          |          |          |          |          |
| 5 B                                                                                                                                  | 2.154828                                                                                                                                                                                                                                                                                                                                                                                                                                                                                                                                                                                                                                                                                                                                                                 | 3.571428 | 2.034252 | 1.860962 | 0.000000 |   |   |      |          |  |  |  |  |      |          |          |  |  |  |      |          |          |          |  |  |      |          |          |          |          |  |     |          |          |          |          |          |      |          |          |          |          |          |
| 6 B                                                                                                                                  | 2.144822                                                                                                                                                                                                                                                                                                                                                                                                                                                                                                                                                                                                                                                                                                                                                                 | 2.037547 | 3.583049 | 1.862272 | 3.157274 |   |   |      |          |  |  |  |  |      |          |          |  |  |  |      |          |          |          |  |  |      |          |          |          |          |  |     |          |          |          |          |          |      |          |          |          |          |          |
|  <p>3. -891.9025277 +31.9 <math>C_{3v}</math></p> | <table border="1"> <thead> <tr> <th></th> <th>1</th> <th>2</th> <th>3</th> <th>4</th> <th>5</th> </tr> </thead> <tbody> <tr> <td>1 B</td> <td>0.000000</td> <td></td> <td></td> <td></td> <td></td> </tr> <tr> <td>2 Re</td> <td>3.088191</td> <td>0.000000</td> <td></td> <td></td> <td></td> </tr> <tr> <td>3 Re</td> <td>2.228989</td> <td>2.411190</td> <td>0.000000</td> <td></td> <td></td> </tr> <tr> <td>4 B</td> <td>1.735667</td> <td>2.223493</td> <td>2.949147</td> <td>0.000000</td> <td></td> </tr> <tr> <td>5 B</td> <td>1.709773</td> <td>2.229414</td> <td>2.232914</td> <td>1.740169</td> <td>0.000000</td> </tr> <tr> <td>6 Re</td> <td>2.249095</td> <td>2.698537</td> <td>2.430952</td> <td>2.239556</td> <td>3.11759</td> </tr> </tbody> </table>  |          | 1        | 2        | 3        | 4 | 5 | 1 B  | 0.000000 |  |  |  |  | 2 Re | 3.088191 | 0.000000 |  |  |  | 3 Re | 2.228989 | 2.411190 | 0.000000 |  |  | 4 B  | 1.735667 | 2.223493 | 2.949147 | 0.000000 |  | 5 B | 1.709773 | 2.229414 | 2.232914 | 1.740169 | 0.000000 | 6 Re | 2.249095 | 2.698537 | 2.430952 | 2.239556 | 3.11759  |
|                                                                                                                                      | 1                                                                                                                                                                                                                                                                                                                                                                                                                                                                                                                                                                                                                                                                                                                                                                        | 2        | 3        | 4        | 5        |   |   |      |          |  |  |  |  |      |          |          |  |  |  |      |          |          |          |  |  |      |          |          |          |          |  |     |          |          |          |          |          |      |          |          |          |          |          |
| 1 B                                                                                                                                  | 0.000000                                                                                                                                                                                                                                                                                                                                                                                                                                                                                                                                                                                                                                                                                                                                                                 |          |          |          |          |   |   |      |          |  |  |  |  |      |          |          |  |  |  |      |          |          |          |  |  |      |          |          |          |          |  |     |          |          |          |          |          |      |          |          |          |          |          |
| 2 Re                                                                                                                                 | 3.088191                                                                                                                                                                                                                                                                                                                                                                                                                                                                                                                                                                                                                                                                                                                                                                 | 0.000000 |          |          |          |   |   |      |          |  |  |  |  |      |          |          |  |  |  |      |          |          |          |  |  |      |          |          |          |          |  |     |          |          |          |          |          |      |          |          |          |          |          |
| 3 Re                                                                                                                                 | 2.228989                                                                                                                                                                                                                                                                                                                                                                                                                                                                                                                                                                                                                                                                                                                                                                 | 2.411190 | 0.000000 |          |          |   |   |      |          |  |  |  |  |      |          |          |  |  |  |      |          |          |          |  |  |      |          |          |          |          |  |     |          |          |          |          |          |      |          |          |          |          |          |
| 4 B                                                                                                                                  | 1.735667                                                                                                                                                                                                                                                                                                                                                                                                                                                                                                                                                                                                                                                                                                                                                                 | 2.223493 | 2.949147 | 0.000000 |          |   |   |      |          |  |  |  |  |      |          |          |  |  |  |      |          |          |          |  |  |      |          |          |          |          |  |     |          |          |          |          |          |      |          |          |          |          |          |
| 5 B                                                                                                                                  | 1.709773                                                                                                                                                                                                                                                                                                                                                                                                                                                                                                                                                                                                                                                                                                                                                                 | 2.229414 | 2.232914 | 1.740169 | 0.000000 |   |   |      |          |  |  |  |  |      |          |          |  |  |  |      |          |          |          |  |  |      |          |          |          |          |  |     |          |          |          |          |          |      |          |          |          |          |          |
| 6 Re                                                                                                                                 | 2.249095                                                                                                                                                                                                                                                                                                                                                                                                                                                                                                                                                                                                                                                                                                                                                                 | 2.698537 | 2.430952 | 2.239556 | 3.11759  |   |   |      |          |  |  |  |  |      |          |          |  |  |  |      |          |          |          |  |  |      |          |          |          |          |  |     |          |          |          |          |          |      |          |          |          |          |          |

Table S2C. Energy ranking for all of the  $\text{Cp}_3\text{Re}_3\text{B}_3\text{H}_3$  optimized structures after B3LYP/6-31G(d) optimizations:

| No. | Structure         | Final energy (a.u.) | $\Delta E$ (kcal/mol) |
|-----|-------------------|---------------------|-----------------------|
| 1   | 06v-02-BicappTd b | -891.7297067        | 0.00                  |
| 2   | 06v-01-Oh a _r-42 | -891.7297046        | 0.00                  |
| 3   | 06v-01-Oh a _i-42 | -891.7287526        | 0.60                  |
| 4   | 06v-02-BicappTd a | -891.7034819        | 16.46                 |
| 5   | 06v-01-Oh b       | -891.6729594        | 35.61                 |

Table S3A. Initial  $\text{Cp}_3\text{Re}_3\text{B}_4\text{H}_4$  structures, 21 structures.

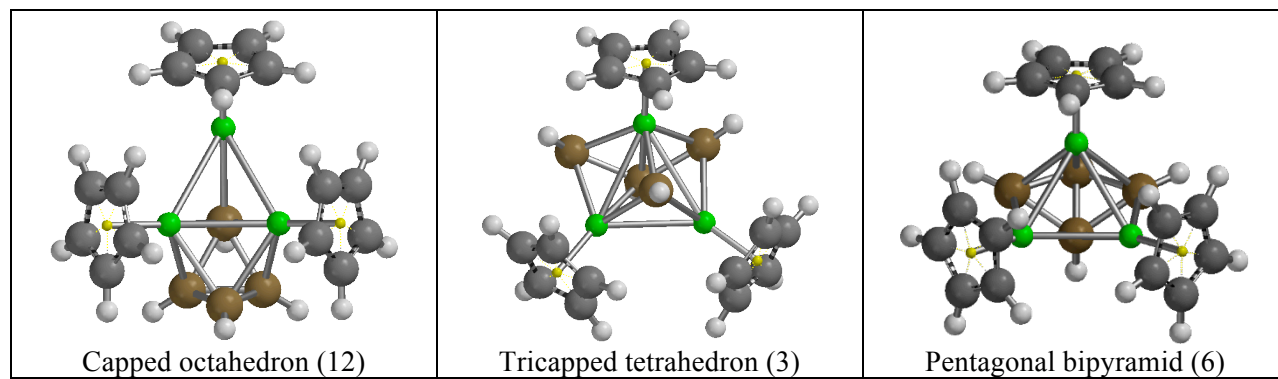

Table S3B. Distance table for the lowest-lying  $\text{Cp}_3\text{Re}_3\text{B}_4\text{H}_4$  structures after M06L/6-311G(d,p) optimization. Included are the ZPcorrected E (a.u.), relative energy (kcal/mol) and symmetry. For clarity only the atoms forming the cluster framework are presented.

| 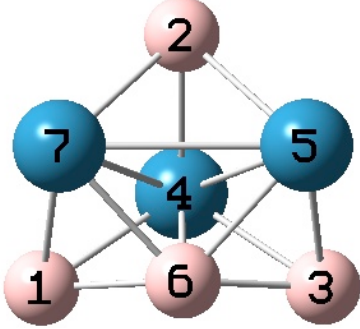 <p>1. -917.4416385 0.0 <math>C_s</math></p>       | <table border="1"> <thead> <tr> <th></th> <th>1</th> <th>2</th> <th>3</th> <th>4</th> <th>5</th> </tr> </thead> <tbody> <tr> <td>1 B</td> <td>0.000000</td> <td></td> <td></td> <td></td> <td></td> </tr> <tr> <td>2 B</td> <td>3.179131</td> <td>0.000000</td> <td></td> <td></td> <td></td> </tr> <tr> <td>3 B</td> <td>3.087191</td> <td>3.178895</td> <td>0.000000</td> <td></td> <td></td> </tr> <tr> <td>4 Re</td> <td>2.141089</td> <td>2.158357</td> <td>2.141110</td> <td>0.000000</td> <td></td> </tr> <tr> <td>5 Re</td> <td>3.585471</td> <td>2.185117</td> <td>2.115794</td> <td>2.881070</td> <td>0.000000</td> </tr> <tr> <td>6 B</td> <td>1.730775</td> <td>2.757151</td> <td>1.730780</td> <td>2.079981</td> <td>2.110704</td> </tr> <tr> <td>7 Re</td> <td>2.115866</td> <td>2.185338</td> <td>3.585398</td> <td>2.881039</td> <td>2.713989</td> </tr> <tr> <td></td> <td>6</td> <td>7</td> <td></td> <td></td> <td></td> </tr> <tr> <td>6 B</td> <td>0.000000</td> <td></td> <td></td> <td></td> <td></td> </tr> <tr> <td>7 Re</td> <td>2.110656</td> <td>0.000000</td> <td></td> <td></td> <td></td> </tr> </tbody> </table> <p>Bridge Re5-H-Re7 Re5-H 1.8437 Re7-H 1.8437</p> |          | 1        | 2        | 3        | 4 | 5 | 1 B | 0.000000 |  |  |  |  | 2 B  | 3.179131 | 0.000000 |  |  |  | 3 B  | 3.087191 | 3.178895 | 0.000000 |  |  | 4 Re | 2.141089 | 2.158357 | 2.141110 | 0.000000 |  | 5 Re | 3.585471 | 2.185117 | 2.115794 | 2.881070 | 0.000000 | 6 B | 1.730775 | 2.757151 | 1.730780 | 2.079981 | 2.110704 | 7 Re | 2.115866 | 2.185338 | 3.585398 | 2.881039 | 2.713989 |  | 6 | 7 |  |  |  | 6 B | 0.000000 |  |  |  |  | 7 Re | 2.110656 | 0.000000 |  |  |  |
|-------------------------------------------------------------------------------------------------------------------------------------|----------------------------------------------------------------------------------------------------------------------------------------------------------------------------------------------------------------------------------------------------------------------------------------------------------------------------------------------------------------------------------------------------------------------------------------------------------------------------------------------------------------------------------------------------------------------------------------------------------------------------------------------------------------------------------------------------------------------------------------------------------------------------------------------------------------------------------------------------------------------------------------------------------------------------------------------------------------------------------------------------------------------------------------------------------------------------------------------------------------------------------------------------------------------------------------------------|----------|----------|----------|----------|---|---|-----|----------|--|--|--|--|------|----------|----------|--|--|--|------|----------|----------|----------|--|--|------|----------|----------|----------|----------|--|------|----------|----------|----------|----------|----------|-----|----------|----------|----------|----------|----------|------|----------|----------|----------|----------|----------|--|---|---|--|--|--|-----|----------|--|--|--|--|------|----------|----------|--|--|--|
|                                                                                                                                     | 1                                                                                                                                                                                                                                                                                                                                                                                                                                                                                                                                                                                                                                                                                                                                                                                                                                                                                                                                                                                                                                                                                                                                                                                                  | 2        | 3        | 4        | 5        |   |   |     |          |  |  |  |  |      |          |          |  |  |  |      |          |          |          |  |  |      |          |          |          |          |  |      |          |          |          |          |          |     |          |          |          |          |          |      |          |          |          |          |          |  |   |   |  |  |  |     |          |  |  |  |  |      |          |          |  |  |  |
| 1 B                                                                                                                                 | 0.000000                                                                                                                                                                                                                                                                                                                                                                                                                                                                                                                                                                                                                                                                                                                                                                                                                                                                                                                                                                                                                                                                                                                                                                                           |          |          |          |          |   |   |     |          |  |  |  |  |      |          |          |  |  |  |      |          |          |          |  |  |      |          |          |          |          |  |      |          |          |          |          |          |     |          |          |          |          |          |      |          |          |          |          |          |  |   |   |  |  |  |     |          |  |  |  |  |      |          |          |  |  |  |
| 2 B                                                                                                                                 | 3.179131                                                                                                                                                                                                                                                                                                                                                                                                                                                                                                                                                                                                                                                                                                                                                                                                                                                                                                                                                                                                                                                                                                                                                                                           | 0.000000 |          |          |          |   |   |     |          |  |  |  |  |      |          |          |  |  |  |      |          |          |          |  |  |      |          |          |          |          |  |      |          |          |          |          |          |     |          |          |          |          |          |      |          |          |          |          |          |  |   |   |  |  |  |     |          |  |  |  |  |      |          |          |  |  |  |
| 3 B                                                                                                                                 | 3.087191                                                                                                                                                                                                                                                                                                                                                                                                                                                                                                                                                                                                                                                                                                                                                                                                                                                                                                                                                                                                                                                                                                                                                                                           | 3.178895 | 0.000000 |          |          |   |   |     |          |  |  |  |  |      |          |          |  |  |  |      |          |          |          |  |  |      |          |          |          |          |  |      |          |          |          |          |          |     |          |          |          |          |          |      |          |          |          |          |          |  |   |   |  |  |  |     |          |  |  |  |  |      |          |          |  |  |  |
| 4 Re                                                                                                                                | 2.141089                                                                                                                                                                                                                                                                                                                                                                                                                                                                                                                                                                                                                                                                                                                                                                                                                                                                                                                                                                                                                                                                                                                                                                                           | 2.158357 | 2.141110 | 0.000000 |          |   |   |     |          |  |  |  |  |      |          |          |  |  |  |      |          |          |          |  |  |      |          |          |          |          |  |      |          |          |          |          |          |     |          |          |          |          |          |      |          |          |          |          |          |  |   |   |  |  |  |     |          |  |  |  |  |      |          |          |  |  |  |
| 5 Re                                                                                                                                | 3.585471                                                                                                                                                                                                                                                                                                                                                                                                                                                                                                                                                                                                                                                                                                                                                                                                                                                                                                                                                                                                                                                                                                                                                                                           | 2.185117 | 2.115794 | 2.881070 | 0.000000 |   |   |     |          |  |  |  |  |      |          |          |  |  |  |      |          |          |          |  |  |      |          |          |          |          |  |      |          |          |          |          |          |     |          |          |          |          |          |      |          |          |          |          |          |  |   |   |  |  |  |     |          |  |  |  |  |      |          |          |  |  |  |
| 6 B                                                                                                                                 | 1.730775                                                                                                                                                                                                                                                                                                                                                                                                                                                                                                                                                                                                                                                                                                                                                                                                                                                                                                                                                                                                                                                                                                                                                                                           | 2.757151 | 1.730780 | 2.079981 | 2.110704 |   |   |     |          |  |  |  |  |      |          |          |  |  |  |      |          |          |          |  |  |      |          |          |          |          |  |      |          |          |          |          |          |     |          |          |          |          |          |      |          |          |          |          |          |  |   |   |  |  |  |     |          |  |  |  |  |      |          |          |  |  |  |
| 7 Re                                                                                                                                | 2.115866                                                                                                                                                                                                                                                                                                                                                                                                                                                                                                                                                                                                                                                                                                                                                                                                                                                                                                                                                                                                                                                                                                                                                                                           | 2.185338 | 3.585398 | 2.881039 | 2.713989 |   |   |     |          |  |  |  |  |      |          |          |  |  |  |      |          |          |          |  |  |      |          |          |          |          |  |      |          |          |          |          |          |     |          |          |          |          |          |      |          |          |          |          |          |  |   |   |  |  |  |     |          |  |  |  |  |      |          |          |  |  |  |
|                                                                                                                                     | 6                                                                                                                                                                                                                                                                                                                                                                                                                                                                                                                                                                                                                                                                                                                                                                                                                                                                                                                                                                                                                                                                                                                                                                                                  | 7        |          |          |          |   |   |     |          |  |  |  |  |      |          |          |  |  |  |      |          |          |          |  |  |      |          |          |          |          |  |      |          |          |          |          |          |     |          |          |          |          |          |      |          |          |          |          |          |  |   |   |  |  |  |     |          |  |  |  |  |      |          |          |  |  |  |
| 6 B                                                                                                                                 | 0.000000                                                                                                                                                                                                                                                                                                                                                                                                                                                                                                                                                                                                                                                                                                                                                                                                                                                                                                                                                                                                                                                                                                                                                                                           |          |          |          |          |   |   |     |          |  |  |  |  |      |          |          |  |  |  |      |          |          |          |  |  |      |          |          |          |          |  |      |          |          |          |          |          |     |          |          |          |          |          |      |          |          |          |          |          |  |   |   |  |  |  |     |          |  |  |  |  |      |          |          |  |  |  |
| 7 Re                                                                                                                                | 2.110656                                                                                                                                                                                                                                                                                                                                                                                                                                                                                                                                                                                                                                                                                                                                                                                                                                                                                                                                                                                                                                                                                                                                                                                           | 0.000000 |          |          |          |   |   |     |          |  |  |  |  |      |          |          |  |  |  |      |          |          |          |  |  |      |          |          |          |          |  |      |          |          |          |          |          |     |          |          |          |          |          |      |          |          |          |          |          |  |   |   |  |  |  |     |          |  |  |  |  |      |          |          |  |  |  |
|  <p>2. -917.4380212 +2.3 <math>C_s</math></p>     | <table border="1"> <thead> <tr> <th></th> <th>1</th> <th>2</th> <th>3</th> <th>4</th> <th>5</th> </tr> </thead> <tbody> <tr> <td>1 B</td> <td>0.000000</td> <td></td> <td></td> <td></td> <td></td> </tr> <tr> <td>2 B</td> <td>1.814142</td> <td>0.000000</td> <td></td> <td></td> <td></td> </tr> <tr> <td>3 Re</td> <td>2.055032</td> <td>2.295648</td> <td>0.000000</td> <td></td> <td></td> </tr> <tr> <td>4 Re</td> <td>2.143692</td> <td>2.247825</td> <td>2.845430</td> <td>0.000000</td> <td></td> </tr> <tr> <td>5 Re</td> <td>3.435918</td> <td>2.247826</td> <td>2.845418</td> <td>2.349199</td> <td>0.000000</td> </tr> <tr> <td>6 B</td> <td>3.069175</td> <td>1.814123</td> <td>2.055034</td> <td>3.435923</td> <td>2.143707</td> </tr> <tr> <td>7 B</td> <td>3.120478</td> <td>3.160516</td> <td>2.122025</td> <td>2.214134</td> <td>2.214174</td> </tr> <tr> <td></td> <td>6</td> <td>7</td> <td></td> <td></td> <td></td> </tr> <tr> <td>6 B</td> <td>0.000000</td> <td></td> <td></td> <td></td> <td></td> </tr> <tr> <td>7 B</td> <td>3.120546</td> <td>0.000000</td> <td></td> <td></td> <td></td> </tr> </tbody> </table>                                                    |          | 1        | 2        | 3        | 4 | 5 | 1 B | 0.000000 |  |  |  |  | 2 B  | 1.814142 | 0.000000 |  |  |  | 3 Re | 2.055032 | 2.295648 | 0.000000 |  |  | 4 Re | 2.143692 | 2.247825 | 2.845430 | 0.000000 |  | 5 Re | 3.435918 | 2.247826 | 2.845418 | 2.349199 | 0.000000 | 6 B | 3.069175 | 1.814123 | 2.055034 | 3.435923 | 2.143707 | 7 B  | 3.120478 | 3.160516 | 2.122025 | 2.214134 | 2.214174 |  | 6 | 7 |  |  |  | 6 B | 0.000000 |  |  |  |  | 7 B  | 3.120546 | 0.000000 |  |  |  |
|                                                                                                                                     | 1                                                                                                                                                                                                                                                                                                                                                                                                                                                                                                                                                                                                                                                                                                                                                                                                                                                                                                                                                                                                                                                                                                                                                                                                  | 2        | 3        | 4        | 5        |   |   |     |          |  |  |  |  |      |          |          |  |  |  |      |          |          |          |  |  |      |          |          |          |          |  |      |          |          |          |          |          |     |          |          |          |          |          |      |          |          |          |          |          |  |   |   |  |  |  |     |          |  |  |  |  |      |          |          |  |  |  |
| 1 B                                                                                                                                 | 0.000000                                                                                                                                                                                                                                                                                                                                                                                                                                                                                                                                                                                                                                                                                                                                                                                                                                                                                                                                                                                                                                                                                                                                                                                           |          |          |          |          |   |   |     |          |  |  |  |  |      |          |          |  |  |  |      |          |          |          |  |  |      |          |          |          |          |  |      |          |          |          |          |          |     |          |          |          |          |          |      |          |          |          |          |          |  |   |   |  |  |  |     |          |  |  |  |  |      |          |          |  |  |  |
| 2 B                                                                                                                                 | 1.814142                                                                                                                                                                                                                                                                                                                                                                                                                                                                                                                                                                                                                                                                                                                                                                                                                                                                                                                                                                                                                                                                                                                                                                                           | 0.000000 |          |          |          |   |   |     |          |  |  |  |  |      |          |          |  |  |  |      |          |          |          |  |  |      |          |          |          |          |  |      |          |          |          |          |          |     |          |          |          |          |          |      |          |          |          |          |          |  |   |   |  |  |  |     |          |  |  |  |  |      |          |          |  |  |  |
| 3 Re                                                                                                                                | 2.055032                                                                                                                                                                                                                                                                                                                                                                                                                                                                                                                                                                                                                                                                                                                                                                                                                                                                                                                                                                                                                                                                                                                                                                                           | 2.295648 | 0.000000 |          |          |   |   |     |          |  |  |  |  |      |          |          |  |  |  |      |          |          |          |  |  |      |          |          |          |          |  |      |          |          |          |          |          |     |          |          |          |          |          |      |          |          |          |          |          |  |   |   |  |  |  |     |          |  |  |  |  |      |          |          |  |  |  |
| 4 Re                                                                                                                                | 2.143692                                                                                                                                                                                                                                                                                                                                                                                                                                                                                                                                                                                                                                                                                                                                                                                                                                                                                                                                                                                                                                                                                                                                                                                           | 2.247825 | 2.845430 | 0.000000 |          |   |   |     |          |  |  |  |  |      |          |          |  |  |  |      |          |          |          |  |  |      |          |          |          |          |  |      |          |          |          |          |          |     |          |          |          |          |          |      |          |          |          |          |          |  |   |   |  |  |  |     |          |  |  |  |  |      |          |          |  |  |  |
| 5 Re                                                                                                                                | 3.435918                                                                                                                                                                                                                                                                                                                                                                                                                                                                                                                                                                                                                                                                                                                                                                                                                                                                                                                                                                                                                                                                                                                                                                                           | 2.247826 | 2.845418 | 2.349199 | 0.000000 |   |   |     |          |  |  |  |  |      |          |          |  |  |  |      |          |          |          |  |  |      |          |          |          |          |  |      |          |          |          |          |          |     |          |          |          |          |          |      |          |          |          |          |          |  |   |   |  |  |  |     |          |  |  |  |  |      |          |          |  |  |  |
| 6 B                                                                                                                                 | 3.069175                                                                                                                                                                                                                                                                                                                                                                                                                                                                                                                                                                                                                                                                                                                                                                                                                                                                                                                                                                                                                                                                                                                                                                                           | 1.814123 | 2.055034 | 3.435923 | 2.143707 |   |   |     |          |  |  |  |  |      |          |          |  |  |  |      |          |          |          |  |  |      |          |          |          |          |  |      |          |          |          |          |          |     |          |          |          |          |          |      |          |          |          |          |          |  |   |   |  |  |  |     |          |  |  |  |  |      |          |          |  |  |  |
| 7 B                                                                                                                                 | 3.120478                                                                                                                                                                                                                                                                                                                                                                                                                                                                                                                                                                                                                                                                                                                                                                                                                                                                                                                                                                                                                                                                                                                                                                                           | 3.160516 | 2.122025 | 2.214134 | 2.214174 |   |   |     |          |  |  |  |  |      |          |          |  |  |  |      |          |          |          |  |  |      |          |          |          |          |  |      |          |          |          |          |          |     |          |          |          |          |          |      |          |          |          |          |          |  |   |   |  |  |  |     |          |  |  |  |  |      |          |          |  |  |  |
|                                                                                                                                     | 6                                                                                                                                                                                                                                                                                                                                                                                                                                                                                                                                                                                                                                                                                                                                                                                                                                                                                                                                                                                                                                                                                                                                                                                                  | 7        |          |          |          |   |   |     |          |  |  |  |  |      |          |          |  |  |  |      |          |          |          |  |  |      |          |          |          |          |  |      |          |          |          |          |          |     |          |          |          |          |          |      |          |          |          |          |          |  |   |   |  |  |  |     |          |  |  |  |  |      |          |          |  |  |  |
| 6 B                                                                                                                                 | 0.000000                                                                                                                                                                                                                                                                                                                                                                                                                                                                                                                                                                                                                                                                                                                                                                                                                                                                                                                                                                                                                                                                                                                                                                                           |          |          |          |          |   |   |     |          |  |  |  |  |      |          |          |  |  |  |      |          |          |          |  |  |      |          |          |          |          |  |      |          |          |          |          |          |     |          |          |          |          |          |      |          |          |          |          |          |  |   |   |  |  |  |     |          |  |  |  |  |      |          |          |  |  |  |
| 7 B                                                                                                                                 | 3.120546                                                                                                                                                                                                                                                                                                                                                                                                                                                                                                                                                                                                                                                                                                                                                                                                                                                                                                                                                                                                                                                                                                                                                                                           | 0.000000 |          |          |          |   |   |     |          |  |  |  |  |      |          |          |  |  |  |      |          |          |          |  |  |      |          |          |          |          |  |      |          |          |          |          |          |     |          |          |          |          |          |      |          |          |          |          |          |  |   |   |  |  |  |     |          |  |  |  |  |      |          |          |  |  |  |
|  <p>3. -917.4232113 +11.6 (<math>C_s</math>)</p> | <table border="1"> <thead> <tr> <th></th> <th>1</th> <th>2</th> <th>3</th> <th>4</th> <th>5</th> </tr> </thead> <tbody> <tr> <td>1 B</td> <td>0.000000</td> <td></td> <td></td> <td></td> <td></td> </tr> <tr> <td>2 Re</td> <td>2.988431</td> <td>0.000000</td> <td></td> <td></td> <td></td> </tr> <tr> <td>3 Re</td> <td>2.302917</td> <td>2.447252</td> <td>0.000000</td> <td></td> <td></td> </tr> <tr> <td>4 B</td> <td>1.738770</td> <td>2.237298</td> <td>2.181154</td> <td>0.000000</td> <td></td> </tr> <tr> <td>5 B</td> <td>1.762498</td> <td>2.264005</td> <td>3.170480</td> <td>1.763103</td> <td>0.000000</td> </tr> <tr> <td>6 B</td> <td>1.839884</td> <td>3.434504</td> <td>2.083164</td> <td>3.123510</td> <td>3.143001</td> </tr> <tr> <td>7 Re</td> <td>2.278513</td> <td>2.412449</td> <td>2.917671</td> <td>3.091479</td> <td>2.136367</td> </tr> <tr> <td></td> <td>6</td> <td>7</td> <td></td> <td></td> <td></td> </tr> <tr> <td>6 B</td> <td>0.000000</td> <td></td> <td></td> <td></td> <td></td> </tr> <tr> <td>7 Re</td> <td>2.093103</td> <td>0.000000</td> <td></td> <td></td> <td></td> </tr> </tbody> </table>                                                   |          | 1        | 2        | 3        | 4 | 5 | 1 B | 0.000000 |  |  |  |  | 2 Re | 2.988431 | 0.000000 |  |  |  | 3 Re | 2.302917 | 2.447252 | 0.000000 |  |  | 4 B  | 1.738770 | 2.237298 | 2.181154 | 0.000000 |  | 5 B  | 1.762498 | 2.264005 | 3.170480 | 1.763103 | 0.000000 | 6 B | 1.839884 | 3.434504 | 2.083164 | 3.123510 | 3.143001 | 7 Re | 2.278513 | 2.412449 | 2.917671 | 3.091479 | 2.136367 |  | 6 | 7 |  |  |  | 6 B | 0.000000 |  |  |  |  | 7 Re | 2.093103 | 0.000000 |  |  |  |
|                                                                                                                                     | 1                                                                                                                                                                                                                                                                                                                                                                                                                                                                                                                                                                                                                                                                                                                                                                                                                                                                                                                                                                                                                                                                                                                                                                                                  | 2        | 3        | 4        | 5        |   |   |     |          |  |  |  |  |      |          |          |  |  |  |      |          |          |          |  |  |      |          |          |          |          |  |      |          |          |          |          |          |     |          |          |          |          |          |      |          |          |          |          |          |  |   |   |  |  |  |     |          |  |  |  |  |      |          |          |  |  |  |
| 1 B                                                                                                                                 | 0.000000                                                                                                                                                                                                                                                                                                                                                                                                                                                                                                                                                                                                                                                                                                                                                                                                                                                                                                                                                                                                                                                                                                                                                                                           |          |          |          |          |   |   |     |          |  |  |  |  |      |          |          |  |  |  |      |          |          |          |  |  |      |          |          |          |          |  |      |          |          |          |          |          |     |          |          |          |          |          |      |          |          |          |          |          |  |   |   |  |  |  |     |          |  |  |  |  |      |          |          |  |  |  |
| 2 Re                                                                                                                                | 2.988431                                                                                                                                                                                                                                                                                                                                                                                                                                                                                                                                                                                                                                                                                                                                                                                                                                                                                                                                                                                                                                                                                                                                                                                           | 0.000000 |          |          |          |   |   |     |          |  |  |  |  |      |          |          |  |  |  |      |          |          |          |  |  |      |          |          |          |          |  |      |          |          |          |          |          |     |          |          |          |          |          |      |          |          |          |          |          |  |   |   |  |  |  |     |          |  |  |  |  |      |          |          |  |  |  |
| 3 Re                                                                                                                                | 2.302917                                                                                                                                                                                                                                                                                                                                                                                                                                                                                                                                                                                                                                                                                                                                                                                                                                                                                                                                                                                                                                                                                                                                                                                           | 2.447252 | 0.000000 |          |          |   |   |     |          |  |  |  |  |      |          |          |  |  |  |      |          |          |          |  |  |      |          |          |          |          |  |      |          |          |          |          |          |     |          |          |          |          |          |      |          |          |          |          |          |  |   |   |  |  |  |     |          |  |  |  |  |      |          |          |  |  |  |
| 4 B                                                                                                                                 | 1.738770                                                                                                                                                                                                                                                                                                                                                                                                                                                                                                                                                                                                                                                                                                                                                                                                                                                                                                                                                                                                                                                                                                                                                                                           | 2.237298 | 2.181154 | 0.000000 |          |   |   |     |          |  |  |  |  |      |          |          |  |  |  |      |          |          |          |  |  |      |          |          |          |          |  |      |          |          |          |          |          |     |          |          |          |          |          |      |          |          |          |          |          |  |   |   |  |  |  |     |          |  |  |  |  |      |          |          |  |  |  |
| 5 B                                                                                                                                 | 1.762498                                                                                                                                                                                                                                                                                                                                                                                                                                                                                                                                                                                                                                                                                                                                                                                                                                                                                                                                                                                                                                                                                                                                                                                           | 2.264005 | 3.170480 | 1.763103 | 0.000000 |   |   |     |          |  |  |  |  |      |          |          |  |  |  |      |          |          |          |  |  |      |          |          |          |          |  |      |          |          |          |          |          |     |          |          |          |          |          |      |          |          |          |          |          |  |   |   |  |  |  |     |          |  |  |  |  |      |          |          |  |  |  |
| 6 B                                                                                                                                 | 1.839884                                                                                                                                                                                                                                                                                                                                                                                                                                                                                                                                                                                                                                                                                                                                                                                                                                                                                                                                                                                                                                                                                                                                                                                           | 3.434504 | 2.083164 | 3.123510 | 3.143001 |   |   |     |          |  |  |  |  |      |          |          |  |  |  |      |          |          |          |  |  |      |          |          |          |          |  |      |          |          |          |          |          |     |          |          |          |          |          |      |          |          |          |          |          |  |   |   |  |  |  |     |          |  |  |  |  |      |          |          |  |  |  |
| 7 Re                                                                                                                                | 2.278513                                                                                                                                                                                                                                                                                                                                                                                                                                                                                                                                                                                                                                                                                                                                                                                                                                                                                                                                                                                                                                                                                                                                                                                           | 2.412449 | 2.917671 | 3.091479 | 2.136367 |   |   |     |          |  |  |  |  |      |          |          |  |  |  |      |          |          |          |  |  |      |          |          |          |          |  |      |          |          |          |          |          |     |          |          |          |          |          |      |          |          |          |          |          |  |   |   |  |  |  |     |          |  |  |  |  |      |          |          |  |  |  |
|                                                                                                                                     | 6                                                                                                                                                                                                                                                                                                                                                                                                                                                                                                                                                                                                                                                                                                                                                                                                                                                                                                                                                                                                                                                                                                                                                                                                  | 7        |          |          |          |   |   |     |          |  |  |  |  |      |          |          |  |  |  |      |          |          |          |  |  |      |          |          |          |          |  |      |          |          |          |          |          |     |          |          |          |          |          |      |          |          |          |          |          |  |   |   |  |  |  |     |          |  |  |  |  |      |          |          |  |  |  |
| 6 B                                                                                                                                 | 0.000000                                                                                                                                                                                                                                                                                                                                                                                                                                                                                                                                                                                                                                                                                                                                                                                                                                                                                                                                                                                                                                                                                                                                                                                           |          |          |          |          |   |   |     |          |  |  |  |  |      |          |          |  |  |  |      |          |          |          |  |  |      |          |          |          |          |  |      |          |          |          |          |          |     |          |          |          |          |          |      |          |          |          |          |          |  |   |   |  |  |  |     |          |  |  |  |  |      |          |          |  |  |  |
| 7 Re                                                                                                                                | 2.093103                                                                                                                                                                                                                                                                                                                                                                                                                                                                                                                                                                                                                                                                                                                                                                                                                                                                                                                                                                                                                                                                                                                                                                                           | 0.000000 |          |          |          |   |   |     |          |  |  |  |  |      |          |          |  |  |  |      |          |          |          |  |  |      |          |          |          |          |  |      |          |          |          |          |          |     |          |          |          |          |          |      |          |          |          |          |          |  |   |   |  |  |  |     |          |  |  |  |  |      |          |          |  |  |  |

| 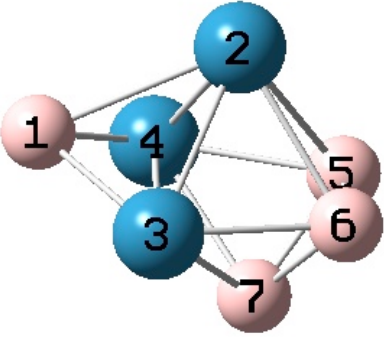 <p>4. -917.4221209 +12.3 C<sub>s</sub></p>   | <table border="1"> <thead> <tr> <th></th> <th>1</th> <th>2</th> <th>3</th> <th>4</th> <th>5</th> </tr> </thead> <tbody> <tr> <td>1 B</td> <td>0.000000</td> <td></td> <td></td> <td></td> <td></td> </tr> <tr> <td>2 Re</td> <td>2.440832</td> <td>0.000000</td> <td></td> <td></td> <td></td> </tr> <tr> <td>3 Re</td> <td>2.099599</td> <td>2.411419</td> <td>0.000000</td> <td></td> <td></td> </tr> <tr> <td>4 Re</td> <td>2.099599</td> <td>2.411419</td> <td>3.005330</td> <td>0.000000</td> <td></td> </tr> <tr> <td>5 B</td> <td>3.585375</td> <td>2.292784</td> <td>3.140114</td> <td>2.186676</td> <td>0.000000</td> </tr> <tr> <td>6 B</td> <td>3.585375</td> <td>2.292784</td> <td>2.186676</td> <td>3.140114</td> <td>1.689918</td> </tr> <tr> <td>7 B</td> <td>3.077541</td> <td>2.930713</td> <td>2.250361</td> <td>2.250361</td> <td>1.735009</td> </tr> <tr> <td></td> <td>6</td> <td>7</td> <td></td> <td></td> <td></td> </tr> <tr> <td>6 B</td> <td>0.000000</td> <td></td> <td></td> <td></td> <td></td> </tr> <tr> <td>7 B</td> <td>1.735009</td> <td>0.000000</td> <td></td> <td></td> <td></td> </tr> </tbody> </table>   |          | 1        | 2        | 3        | 4 | 5 | 1 B | 0.000000 |  |  |  |  | 2 Re | 2.440832 | 0.000000 |  |  |  | 3 Re | 2.099599 | 2.411419 | 0.000000 |  |  | 4 Re | 2.099599 | 2.411419 | 3.005330 | 0.000000 |  | 5 B  | 3.585375 | 2.292784 | 3.140114 | 2.186676 | 0.000000 | 6 B  | 3.585375 | 2.292784 | 2.186676 | 3.140114 | 1.689918 | 7 B  | 3.077541 | 2.930713 | 2.250361 | 2.250361 | 1.735009 |  | 6 | 7 |  |  |  | 6 B  | 0.000000 |  |  |  |  | 7 B  | 1.735009 | 0.000000 |  |  |  |
|--------------------------------------------------------------------------------------------------------------------------------|---------------------------------------------------------------------------------------------------------------------------------------------------------------------------------------------------------------------------------------------------------------------------------------------------------------------------------------------------------------------------------------------------------------------------------------------------------------------------------------------------------------------------------------------------------------------------------------------------------------------------------------------------------------------------------------------------------------------------------------------------------------------------------------------------------------------------------------------------------------------------------------------------------------------------------------------------------------------------------------------------------------------------------------------------------------------------------------------------------------------------------------------------|----------|----------|----------|----------|---|---|-----|----------|--|--|--|--|------|----------|----------|--|--|--|------|----------|----------|----------|--|--|------|----------|----------|----------|----------|--|------|----------|----------|----------|----------|----------|------|----------|----------|----------|----------|----------|------|----------|----------|----------|----------|----------|--|---|---|--|--|--|------|----------|--|--|--|--|------|----------|----------|--|--|--|
|                                                                                                                                | 1                                                                                                                                                                                                                                                                                                                                                                                                                                                                                                                                                                                                                                                                                                                                                                                                                                                                                                                                                                                                                                                                                                                                                 | 2        | 3        | 4        | 5        |   |   |     |          |  |  |  |  |      |          |          |  |  |  |      |          |          |          |  |  |      |          |          |          |          |  |      |          |          |          |          |          |      |          |          |          |          |          |      |          |          |          |          |          |  |   |   |  |  |  |      |          |  |  |  |  |      |          |          |  |  |  |
| 1 B                                                                                                                            | 0.000000                                                                                                                                                                                                                                                                                                                                                                                                                                                                                                                                                                                                                                                                                                                                                                                                                                                                                                                                                                                                                                                                                                                                          |          |          |          |          |   |   |     |          |  |  |  |  |      |          |          |  |  |  |      |          |          |          |  |  |      |          |          |          |          |  |      |          |          |          |          |          |      |          |          |          |          |          |      |          |          |          |          |          |  |   |   |  |  |  |      |          |  |  |  |  |      |          |          |  |  |  |
| 2 Re                                                                                                                           | 2.440832                                                                                                                                                                                                                                                                                                                                                                                                                                                                                                                                                                                                                                                                                                                                                                                                                                                                                                                                                                                                                                                                                                                                          | 0.000000 |          |          |          |   |   |     |          |  |  |  |  |      |          |          |  |  |  |      |          |          |          |  |  |      |          |          |          |          |  |      |          |          |          |          |          |      |          |          |          |          |          |      |          |          |          |          |          |  |   |   |  |  |  |      |          |  |  |  |  |      |          |          |  |  |  |
| 3 Re                                                                                                                           | 2.099599                                                                                                                                                                                                                                                                                                                                                                                                                                                                                                                                                                                                                                                                                                                                                                                                                                                                                                                                                                                                                                                                                                                                          | 2.411419 | 0.000000 |          |          |   |   |     |          |  |  |  |  |      |          |          |  |  |  |      |          |          |          |  |  |      |          |          |          |          |  |      |          |          |          |          |          |      |          |          |          |          |          |      |          |          |          |          |          |  |   |   |  |  |  |      |          |  |  |  |  |      |          |          |  |  |  |
| 4 Re                                                                                                                           | 2.099599                                                                                                                                                                                                                                                                                                                                                                                                                                                                                                                                                                                                                                                                                                                                                                                                                                                                                                                                                                                                                                                                                                                                          | 2.411419 | 3.005330 | 0.000000 |          |   |   |     |          |  |  |  |  |      |          |          |  |  |  |      |          |          |          |  |  |      |          |          |          |          |  |      |          |          |          |          |          |      |          |          |          |          |          |      |          |          |          |          |          |  |   |   |  |  |  |      |          |  |  |  |  |      |          |          |  |  |  |
| 5 B                                                                                                                            | 3.585375                                                                                                                                                                                                                                                                                                                                                                                                                                                                                                                                                                                                                                                                                                                                                                                                                                                                                                                                                                                                                                                                                                                                          | 2.292784 | 3.140114 | 2.186676 | 0.000000 |   |   |     |          |  |  |  |  |      |          |          |  |  |  |      |          |          |          |  |  |      |          |          |          |          |  |      |          |          |          |          |          |      |          |          |          |          |          |      |          |          |          |          |          |  |   |   |  |  |  |      |          |  |  |  |  |      |          |          |  |  |  |
| 6 B                                                                                                                            | 3.585375                                                                                                                                                                                                                                                                                                                                                                                                                                                                                                                                                                                                                                                                                                                                                                                                                                                                                                                                                                                                                                                                                                                                          | 2.292784 | 2.186676 | 3.140114 | 1.689918 |   |   |     |          |  |  |  |  |      |          |          |  |  |  |      |          |          |          |  |  |      |          |          |          |          |  |      |          |          |          |          |          |      |          |          |          |          |          |      |          |          |          |          |          |  |   |   |  |  |  |      |          |  |  |  |  |      |          |          |  |  |  |
| 7 B                                                                                                                            | 3.077541                                                                                                                                                                                                                                                                                                                                                                                                                                                                                                                                                                                                                                                                                                                                                                                                                                                                                                                                                                                                                                                                                                                                          | 2.930713 | 2.250361 | 2.250361 | 1.735009 |   |   |     |          |  |  |  |  |      |          |          |  |  |  |      |          |          |          |  |  |      |          |          |          |          |  |      |          |          |          |          |          |      |          |          |          |          |          |      |          |          |          |          |          |  |   |   |  |  |  |      |          |  |  |  |  |      |          |          |  |  |  |
|                                                                                                                                | 6                                                                                                                                                                                                                                                                                                                                                                                                                                                                                                                                                                                                                                                                                                                                                                                                                                                                                                                                                                                                                                                                                                                                                 | 7        |          |          |          |   |   |     |          |  |  |  |  |      |          |          |  |  |  |      |          |          |          |  |  |      |          |          |          |          |  |      |          |          |          |          |          |      |          |          |          |          |          |      |          |          |          |          |          |  |   |   |  |  |  |      |          |  |  |  |  |      |          |          |  |  |  |
| 6 B                                                                                                                            | 0.000000                                                                                                                                                                                                                                                                                                                                                                                                                                                                                                                                                                                                                                                                                                                                                                                                                                                                                                                                                                                                                                                                                                                                          |          |          |          |          |   |   |     |          |  |  |  |  |      |          |          |  |  |  |      |          |          |          |  |  |      |          |          |          |          |  |      |          |          |          |          |          |      |          |          |          |          |          |      |          |          |          |          |          |  |   |   |  |  |  |      |          |  |  |  |  |      |          |          |  |  |  |
| 7 B                                                                                                                            | 1.735009                                                                                                                                                                                                                                                                                                                                                                                                                                                                                                                                                                                                                                                                                                                                                                                                                                                                                                                                                                                                                                                                                                                                          | 0.000000 |          |          |          |   |   |     |          |  |  |  |  |      |          |          |  |  |  |      |          |          |          |  |  |      |          |          |          |          |  |      |          |          |          |          |          |      |          |          |          |          |          |      |          |          |          |          |          |  |   |   |  |  |  |      |          |  |  |  |  |      |          |          |  |  |  |
|  <p>5. -917.4147131 +16.9 C<sub>3v</sub></p>  | <table border="1"> <thead> <tr> <th></th> <th>1</th> <th>2</th> <th>3</th> <th>4</th> <th>5</th> </tr> </thead> <tbody> <tr> <td>1 B</td> <td>0.000000</td> <td></td> <td></td> <td></td> <td></td> </tr> <tr> <td>2 B</td> <td>3.098674</td> <td>0.000000</td> <td></td> <td></td> <td></td> </tr> <tr> <td>3 B</td> <td>3.100910</td> <td>3.099729</td> <td>0.000000</td> <td></td> <td></td> </tr> <tr> <td>4 B</td> <td>1.842877</td> <td>1.842563</td> <td>1.840037</td> <td>0.000000</td> <td></td> </tr> <tr> <td>5 Re</td> <td>3.524300</td> <td>2.091924</td> <td>2.092488</td> <td>2.268684</td> <td>0.000000</td> </tr> <tr> <td>6 Re</td> <td>2.092513</td> <td>3.526563</td> <td>2.091798</td> <td>2.269008</td> <td>2.598305</td> </tr> <tr> <td>7 Re</td> <td>2.089115</td> <td>2.090542</td> <td>3.526005</td> <td>2.269567</td> <td>2.597707</td> </tr> <tr> <td></td> <td>6</td> <td>7</td> <td></td> <td></td> <td></td> </tr> <tr> <td>6 Re</td> <td>0.000000</td> <td></td> <td></td> <td></td> <td></td> </tr> <tr> <td>7 Re</td> <td>2.600771</td> <td>0.000000</td> <td></td> <td></td> <td></td> </tr> </tbody> </table> |          | 1        | 2        | 3        | 4 | 5 | 1 B | 0.000000 |  |  |  |  | 2 B  | 3.098674 | 0.000000 |  |  |  | 3 B  | 3.100910 | 3.099729 | 0.000000 |  |  | 4 B  | 1.842877 | 1.842563 | 1.840037 | 0.000000 |  | 5 Re | 3.524300 | 2.091924 | 2.092488 | 2.268684 | 0.000000 | 6 Re | 2.092513 | 3.526563 | 2.091798 | 2.269008 | 2.598305 | 7 Re | 2.089115 | 2.090542 | 3.526005 | 2.269567 | 2.597707 |  | 6 | 7 |  |  |  | 6 Re | 0.000000 |  |  |  |  | 7 Re | 2.600771 | 0.000000 |  |  |  |
|                                                                                                                                | 1                                                                                                                                                                                                                                                                                                                                                                                                                                                                                                                                                                                                                                                                                                                                                                                                                                                                                                                                                                                                                                                                                                                                                 | 2        | 3        | 4        | 5        |   |   |     |          |  |  |  |  |      |          |          |  |  |  |      |          |          |          |  |  |      |          |          |          |          |  |      |          |          |          |          |          |      |          |          |          |          |          |      |          |          |          |          |          |  |   |   |  |  |  |      |          |  |  |  |  |      |          |          |  |  |  |
| 1 B                                                                                                                            | 0.000000                                                                                                                                                                                                                                                                                                                                                                                                                                                                                                                                                                                                                                                                                                                                                                                                                                                                                                                                                                                                                                                                                                                                          |          |          |          |          |   |   |     |          |  |  |  |  |      |          |          |  |  |  |      |          |          |          |  |  |      |          |          |          |          |  |      |          |          |          |          |          |      |          |          |          |          |          |      |          |          |          |          |          |  |   |   |  |  |  |      |          |  |  |  |  |      |          |          |  |  |  |
| 2 B                                                                                                                            | 3.098674                                                                                                                                                                                                                                                                                                                                                                                                                                                                                                                                                                                                                                                                                                                                                                                                                                                                                                                                                                                                                                                                                                                                          | 0.000000 |          |          |          |   |   |     |          |  |  |  |  |      |          |          |  |  |  |      |          |          |          |  |  |      |          |          |          |          |  |      |          |          |          |          |          |      |          |          |          |          |          |      |          |          |          |          |          |  |   |   |  |  |  |      |          |  |  |  |  |      |          |          |  |  |  |
| 3 B                                                                                                                            | 3.100910                                                                                                                                                                                                                                                                                                                                                                                                                                                                                                                                                                                                                                                                                                                                                                                                                                                                                                                                                                                                                                                                                                                                          | 3.099729 | 0.000000 |          |          |   |   |     |          |  |  |  |  |      |          |          |  |  |  |      |          |          |          |  |  |      |          |          |          |          |  |      |          |          |          |          |          |      |          |          |          |          |          |      |          |          |          |          |          |  |   |   |  |  |  |      |          |  |  |  |  |      |          |          |  |  |  |
| 4 B                                                                                                                            | 1.842877                                                                                                                                                                                                                                                                                                                                                                                                                                                                                                                                                                                                                                                                                                                                                                                                                                                                                                                                                                                                                                                                                                                                          | 1.842563 | 1.840037 | 0.000000 |          |   |   |     |          |  |  |  |  |      |          |          |  |  |  |      |          |          |          |  |  |      |          |          |          |          |  |      |          |          |          |          |          |      |          |          |          |          |          |      |          |          |          |          |          |  |   |   |  |  |  |      |          |  |  |  |  |      |          |          |  |  |  |
| 5 Re                                                                                                                           | 3.524300                                                                                                                                                                                                                                                                                                                                                                                                                                                                                                                                                                                                                                                                                                                                                                                                                                                                                                                                                                                                                                                                                                                                          | 2.091924 | 2.092488 | 2.268684 | 0.000000 |   |   |     |          |  |  |  |  |      |          |          |  |  |  |      |          |          |          |  |  |      |          |          |          |          |  |      |          |          |          |          |          |      |          |          |          |          |          |      |          |          |          |          |          |  |   |   |  |  |  |      |          |  |  |  |  |      |          |          |  |  |  |
| 6 Re                                                                                                                           | 2.092513                                                                                                                                                                                                                                                                                                                                                                                                                                                                                                                                                                                                                                                                                                                                                                                                                                                                                                                                                                                                                                                                                                                                          | 3.526563 | 2.091798 | 2.269008 | 2.598305 |   |   |     |          |  |  |  |  |      |          |          |  |  |  |      |          |          |          |  |  |      |          |          |          |          |  |      |          |          |          |          |          |      |          |          |          |          |          |      |          |          |          |          |          |  |   |   |  |  |  |      |          |  |  |  |  |      |          |          |  |  |  |
| 7 Re                                                                                                                           | 2.089115                                                                                                                                                                                                                                                                                                                                                                                                                                                                                                                                                                                                                                                                                                                                                                                                                                                                                                                                                                                                                                                                                                                                          | 2.090542 | 3.526005 | 2.269567 | 2.597707 |   |   |     |          |  |  |  |  |      |          |          |  |  |  |      |          |          |          |  |  |      |          |          |          |          |  |      |          |          |          |          |          |      |          |          |          |          |          |      |          |          |          |          |          |  |   |   |  |  |  |      |          |  |  |  |  |      |          |          |  |  |  |
|                                                                                                                                | 6                                                                                                                                                                                                                                                                                                                                                                                                                                                                                                                                                                                                                                                                                                                                                                                                                                                                                                                                                                                                                                                                                                                                                 | 7        |          |          |          |   |   |     |          |  |  |  |  |      |          |          |  |  |  |      |          |          |          |  |  |      |          |          |          |          |  |      |          |          |          |          |          |      |          |          |          |          |          |      |          |          |          |          |          |  |   |   |  |  |  |      |          |  |  |  |  |      |          |          |  |  |  |
| 6 Re                                                                                                                           | 0.000000                                                                                                                                                                                                                                                                                                                                                                                                                                                                                                                                                                                                                                                                                                                                                                                                                                                                                                                                                                                                                                                                                                                                          |          |          |          |          |   |   |     |          |  |  |  |  |      |          |          |  |  |  |      |          |          |          |  |  |      |          |          |          |          |  |      |          |          |          |          |          |      |          |          |          |          |          |      |          |          |          |          |          |  |   |   |  |  |  |      |          |  |  |  |  |      |          |          |  |  |  |
| 7 Re                                                                                                                           | 2.600771                                                                                                                                                                                                                                                                                                                                                                                                                                                                                                                                                                                                                                                                                                                                                                                                                                                                                                                                                                                                                                                                                                                                          | 0.000000 |          |          |          |   |   |     |          |  |  |  |  |      |          |          |  |  |  |      |          |          |          |  |  |      |          |          |          |          |  |      |          |          |          |          |          |      |          |          |          |          |          |      |          |          |          |          |          |  |   |   |  |  |  |      |          |  |  |  |  |      |          |          |  |  |  |
|  <p>6. -917.3967227 +28.2 C<sub>1</sub></p> | <table border="1"> <thead> <tr> <th></th> <th>1</th> <th>2</th> <th>3</th> <th>4</th> <th>5</th> </tr> </thead> <tbody> <tr> <td>1 B</td> <td>0.000000</td> <td></td> <td></td> <td></td> <td></td> </tr> <tr> <td>2 B</td> <td>1.696950</td> <td>0.000000</td> <td></td> <td></td> <td></td> </tr> <tr> <td>3 Re</td> <td>2.024482</td> <td>2.356117</td> <td>0.000000</td> <td></td> <td></td> </tr> <tr> <td>4 B</td> <td>1.822549</td> <td>1.754166</td> <td>2.337836</td> <td>0.000000</td> <td></td> </tr> <tr> <td>5 Re</td> <td>3.433638</td> <td>2.083364</td> <td>3.012298</td> <td>2.290902</td> <td>0.000000</td> </tr> <tr> <td>6 B</td> <td>3.993711</td> <td>3.224755</td> <td>2.419772</td> <td>3.290527</td> <td>2.121039</td> </tr> <tr> <td>7 Re</td> <td>3.594171</td> <td>3.326259</td> <td>2.542896</td> <td>2.259235</td> <td>2.387750</td> </tr> <tr> <td></td> <td>6</td> <td>7</td> <td></td> <td></td> <td></td> </tr> <tr> <td>6 B</td> <td>0.000000</td> <td></td> <td></td> <td></td> <td></td> </tr> <tr> <td>7 Re</td> <td>2.096267</td> <td>0.000000</td> <td></td> <td></td> <td></td> </tr> </tbody> </table>  |          | 1        | 2        | 3        | 4 | 5 | 1 B | 0.000000 |  |  |  |  | 2 B  | 1.696950 | 0.000000 |  |  |  | 3 Re | 2.024482 | 2.356117 | 0.000000 |  |  | 4 B  | 1.822549 | 1.754166 | 2.337836 | 0.000000 |  | 5 Re | 3.433638 | 2.083364 | 3.012298 | 2.290902 | 0.000000 | 6 B  | 3.993711 | 3.224755 | 2.419772 | 3.290527 | 2.121039 | 7 Re | 3.594171 | 3.326259 | 2.542896 | 2.259235 | 2.387750 |  | 6 | 7 |  |  |  | 6 B  | 0.000000 |  |  |  |  | 7 Re | 2.096267 | 0.000000 |  |  |  |
|                                                                                                                                | 1                                                                                                                                                                                                                                                                                                                                                                                                                                                                                                                                                                                                                                                                                                                                                                                                                                                                                                                                                                                                                                                                                                                                                 | 2        | 3        | 4        | 5        |   |   |     |          |  |  |  |  |      |          |          |  |  |  |      |          |          |          |  |  |      |          |          |          |          |  |      |          |          |          |          |          |      |          |          |          |          |          |      |          |          |          |          |          |  |   |   |  |  |  |      |          |  |  |  |  |      |          |          |  |  |  |
| 1 B                                                                                                                            | 0.000000                                                                                                                                                                                                                                                                                                                                                                                                                                                                                                                                                                                                                                                                                                                                                                                                                                                                                                                                                                                                                                                                                                                                          |          |          |          |          |   |   |     |          |  |  |  |  |      |          |          |  |  |  |      |          |          |          |  |  |      |          |          |          |          |  |      |          |          |          |          |          |      |          |          |          |          |          |      |          |          |          |          |          |  |   |   |  |  |  |      |          |  |  |  |  |      |          |          |  |  |  |
| 2 B                                                                                                                            | 1.696950                                                                                                                                                                                                                                                                                                                                                                                                                                                                                                                                                                                                                                                                                                                                                                                                                                                                                                                                                                                                                                                                                                                                          | 0.000000 |          |          |          |   |   |     |          |  |  |  |  |      |          |          |  |  |  |      |          |          |          |  |  |      |          |          |          |          |  |      |          |          |          |          |          |      |          |          |          |          |          |      |          |          |          |          |          |  |   |   |  |  |  |      |          |  |  |  |  |      |          |          |  |  |  |
| 3 Re                                                                                                                           | 2.024482                                                                                                                                                                                                                                                                                                                                                                                                                                                                                                                                                                                                                                                                                                                                                                                                                                                                                                                                                                                                                                                                                                                                          | 2.356117 | 0.000000 |          |          |   |   |     |          |  |  |  |  |      |          |          |  |  |  |      |          |          |          |  |  |      |          |          |          |          |  |      |          |          |          |          |          |      |          |          |          |          |          |      |          |          |          |          |          |  |   |   |  |  |  |      |          |  |  |  |  |      |          |          |  |  |  |
| 4 B                                                                                                                            | 1.822549                                                                                                                                                                                                                                                                                                                                                                                                                                                                                                                                                                                                                                                                                                                                                                                                                                                                                                                                                                                                                                                                                                                                          | 1.754166 | 2.337836 | 0.000000 |          |   |   |     |          |  |  |  |  |      |          |          |  |  |  |      |          |          |          |  |  |      |          |          |          |          |  |      |          |          |          |          |          |      |          |          |          |          |          |      |          |          |          |          |          |  |   |   |  |  |  |      |          |  |  |  |  |      |          |          |  |  |  |
| 5 Re                                                                                                                           | 3.433638                                                                                                                                                                                                                                                                                                                                                                                                                                                                                                                                                                                                                                                                                                                                                                                                                                                                                                                                                                                                                                                                                                                                          | 2.083364 | 3.012298 | 2.290902 | 0.000000 |   |   |     |          |  |  |  |  |      |          |          |  |  |  |      |          |          |          |  |  |      |          |          |          |          |  |      |          |          |          |          |          |      |          |          |          |          |          |      |          |          |          |          |          |  |   |   |  |  |  |      |          |  |  |  |  |      |          |          |  |  |  |
| 6 B                                                                                                                            | 3.993711                                                                                                                                                                                                                                                                                                                                                                                                                                                                                                                                                                                                                                                                                                                                                                                                                                                                                                                                                                                                                                                                                                                                          | 3.224755 | 2.419772 | 3.290527 | 2.121039 |   |   |     |          |  |  |  |  |      |          |          |  |  |  |      |          |          |          |  |  |      |          |          |          |          |  |      |          |          |          |          |          |      |          |          |          |          |          |      |          |          |          |          |          |  |   |   |  |  |  |      |          |  |  |  |  |      |          |          |  |  |  |
| 7 Re                                                                                                                           | 3.594171                                                                                                                                                                                                                                                                                                                                                                                                                                                                                                                                                                                                                                                                                                                                                                                                                                                                                                                                                                                                                                                                                                                                          | 3.326259 | 2.542896 | 2.259235 | 2.387750 |   |   |     |          |  |  |  |  |      |          |          |  |  |  |      |          |          |          |  |  |      |          |          |          |          |  |      |          |          |          |          |          |      |          |          |          |          |          |      |          |          |          |          |          |  |   |   |  |  |  |      |          |  |  |  |  |      |          |          |  |  |  |
|                                                                                                                                | 6                                                                                                                                                                                                                                                                                                                                                                                                                                                                                                                                                                                                                                                                                                                                                                                                                                                                                                                                                                                                                                                                                                                                                 | 7        |          |          |          |   |   |     |          |  |  |  |  |      |          |          |  |  |  |      |          |          |          |  |  |      |          |          |          |          |  |      |          |          |          |          |          |      |          |          |          |          |          |      |          |          |          |          |          |  |   |   |  |  |  |      |          |  |  |  |  |      |          |          |  |  |  |
| 6 B                                                                                                                            | 0.000000                                                                                                                                                                                                                                                                                                                                                                                                                                                                                                                                                                                                                                                                                                                                                                                                                                                                                                                                                                                                                                                                                                                                          |          |          |          |          |   |   |     |          |  |  |  |  |      |          |          |  |  |  |      |          |          |          |  |  |      |          |          |          |          |  |      |          |          |          |          |          |      |          |          |          |          |          |      |          |          |          |          |          |  |   |   |  |  |  |      |          |  |  |  |  |      |          |          |  |  |  |
| 7 Re                                                                                                                           | 2.096267                                                                                                                                                                                                                                                                                                                                                                                                                                                                                                                                                                                                                                                                                                                                                                                                                                                                                                                                                                                                                                                                                                                                          | 0.000000 |          |          |          |   |   |     |          |  |  |  |  |      |          |          |  |  |  |      |          |          |          |  |  |      |          |          |          |          |  |      |          |          |          |          |          |      |          |          |          |          |          |      |          |          |          |          |          |  |   |   |  |  |  |      |          |  |  |  |  |      |          |          |  |  |  |



Table S3C. Energy ranking for all of the Cp<sub>3</sub>Re<sub>3</sub>B<sub>4</sub>H<sub>4</sub> optimized structures after B3LYP/6-31G(d) optimizations:

| No. | Structure                | Final energy (a.u.) | ΔE (kcal/mol) |
|-----|--------------------------|---------------------|---------------|
| 1   | 07v-01-CapOh d           | -917.1960783        | 0.00          |
| 2   | 07v-02-TricapTd a        | -917.1960773        | 0.00          |
| 3   | 07v-01-CapOh e           | -917.1960753        | 0.00          |
| 4   | 07v-02-TricapTd b        | -917.1855134        | 6.63          |
| 5   | 07v-01-CapOh b           | -917.1812464        | 9.31          |
| 6   | 07v-01-CapOh c _i-20     | -917.1799178        | 10.14         |
| 7   | 07v-03-PentBipyr b       | -917.1799043        | 10.15         |
| 8   | 07v-01-CapOh c _r-20     | -917.1797787        | 10.23         |
| 9   | 07v-02-TricapTd c        | -917.1687897        | 17.12         |
| 10  | 07v-03-PentBipyr c       | -917.1687470        | 17.15         |
| 11  | 07v-03-PentBipyr d _r-31 | -917.1685615        | 17.27         |
| 12  | 07v-03-PentBipyr d _i-31 | -917.1681591        | 17.52         |
| 13  | 07v-01-CapOh j           | -917.1553723        | 25.54         |
| 14  | 07v-01-CapOh l           | -917.1517259        | 27.83         |
| 15  | 07v-01-CapOh h           | -917.1517165        | 27.84         |
| 16  | 07v-01-CapOh k           | -917.1467260        | 30.97         |
| 17  | 07v-03-PentBipyr a       | -917.1440511        | 32.65         |
| 18  | 07v-03-PentBipyr f       | -917.1315602        | 40.49         |
| 19  | 07v-01-CapOh a _r-68     | -917.1303480        | 41.25         |
| 20  | 07v-01-CapOh a _i-68     | -917.1277030        | 42.91         |
| 21  | 07v-01-CapOh f _r-31     | -917.1238127        | 45.35         |
| 22  | 07v-01-CapOh f _i-31     | -917.1223875        | 46.24         |
| 23  | 07v-01-CapOh g           | -917.1198923        | 47.81         |
| 24  | 07v-01-CapOh i           | -917.1057128        | 56.71         |
| 25  | 07v-03-PentBipyr e _i-37 | -917.0904312        | 66.30         |
| 26  | 07v-03-PentBipyr e _r-37 | -917.0903893        | 66.32         |

Table S4A. Initial  $\text{Cp}_3\text{Re}_3\text{B}_5\text{H}_5$  structures, 51 structures.

|                                                                                                                    |                                                                                                                       |
|--------------------------------------------------------------------------------------------------------------------|-----------------------------------------------------------------------------------------------------------------------|
| <p>Initial structures</p>                                                                                          | 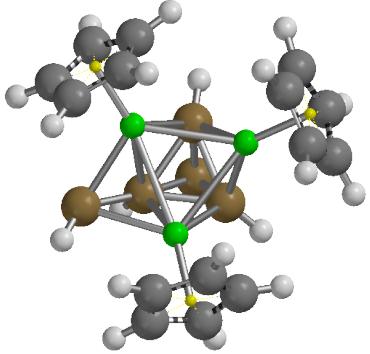 <p>Dicapped octahedron (11)</p>     |
|  <p>Bisdisphenoid (9)</p>        |  <p>Cube (4)</p>                    |
|  <p>Antiprism (4)</p>           |  <p>Trigonal antiprism (8)</p>     |
|  <p>Hexagonal bipyramid (7)</p> |  <p>All capped tetrahedron (8)</p> |

Table S4B. Distance table for the lowest-lying Cp<sub>3</sub>Re<sub>3</sub>B<sub>5</sub>H<sub>5</sub> structures after M06L/6-311G(d,p) optimization. Included are the ZPcorrected E (a.u.), relative energy (kcal/mol) and symmetry.

| 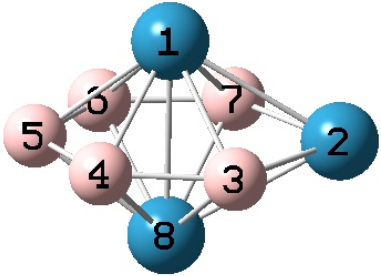 <p>1. -942.9328102 0.0 C<sub>2v</sub></p>    | <table border="1"> <thead> <tr> <th></th> <th>1</th> <th>2</th> <th>3</th> <th>4</th> <th>5</th> </tr> </thead> <tbody> <tr> <td>1 Re</td> <td>0.000000</td> <td></td> <td></td> <td></td> <td></td> </tr> <tr> <td>2 Re</td> <td>2.606689</td> <td>0.000000</td> <td></td> <td></td> <td></td> </tr> <tr> <td>3 B</td> <td>2.266248</td> <td>2.127726</td> <td>0.000000</td> <td></td> <td></td> </tr> <tr> <td>4 B</td> <td>2.182033</td> <td>3.462758</td> <td>1.760184</td> <td>0.000000</td> <td></td> </tr> <tr> <td>5 B</td> <td>2.192598</td> <td>3.979775</td> <td>3.068192</td> <td>1.706789</td> <td>0.000000</td> </tr> <tr> <td>6 B</td> <td>2.184915</td> <td>3.460037</td> <td>3.562323</td> <td>2.959055</td> <td>1.706354</td> </tr> <tr> <td>7 B</td> <td>2.267974</td> <td>2.124583</td> <td>3.241625</td> <td>3.561145</td> <td>3.065814</td> </tr> <tr> <td>8 Re</td> <td>2.667326</td> <td>2.604968</td> <td>2.270887</td> <td>2.179516</td> <td>2.193784</td> </tr> <tr> <td></td> <td>6</td> <td>7</td> <td>8</td> <td></td> <td></td> </tr> <tr> <td>6 B</td> <td>0.000000</td> <td></td> <td></td> <td></td> <td></td> </tr> <tr> <td>7 B</td> <td>1.757660</td> <td>0.000000</td> <td></td> <td></td> <td></td> </tr> <tr> <td>8 Re</td> <td>2.181244</td> <td>2.272207</td> <td>0.000000</td> <td></td> <td></td> </tr> </tbody> </table>                                                 |          | 1        | 2        | 3        | 4 | 5 | 1 Re | 0.000000 |  |  |  |  | 2 Re | 2.606689 | 0.000000 |  |  |  | 3 B  | 2.266248 | 2.127726 | 0.000000 |  |  | 4 B | 2.182033 | 3.462758 | 1.760184 | 0.000000 |  | 5 B | 2.192598 | 3.979775 | 3.068192 | 1.706789 | 0.000000 | 6 B  | 2.184915 | 3.460037 | 3.562323 | 2.959055 | 1.706354 | 7 B  | 2.267974 | 2.124583 | 3.241625 | 3.561145 | 3.065814 | 8 Re | 2.667326 | 2.604968 | 2.270887 | 2.179516 | 2.193784 |  | 6 | 7 | 8 |  |  | 6 B  | 0.000000 |  |  |  |  | 7 B  | 1.757660 | 0.000000 |  |  |  | 8 Re | 2.181244 | 2.272207 | 0.000000 |  |  |
|--------------------------------------------------------------------------------------------------------------------------------|-----------------------------------------------------------------------------------------------------------------------------------------------------------------------------------------------------------------------------------------------------------------------------------------------------------------------------------------------------------------------------------------------------------------------------------------------------------------------------------------------------------------------------------------------------------------------------------------------------------------------------------------------------------------------------------------------------------------------------------------------------------------------------------------------------------------------------------------------------------------------------------------------------------------------------------------------------------------------------------------------------------------------------------------------------------------------------------------------------------------------------------------------------------------------------------------------------------------------------------------------------------------------------------------------------------------------------------------------------------------------------------------------------------------------|----------|----------|----------|----------|---|---|------|----------|--|--|--|--|------|----------|----------|--|--|--|------|----------|----------|----------|--|--|-----|----------|----------|----------|----------|--|-----|----------|----------|----------|----------|----------|------|----------|----------|----------|----------|----------|------|----------|----------|----------|----------|----------|------|----------|----------|----------|----------|----------|--|---|---|---|--|--|------|----------|--|--|--|--|------|----------|----------|--|--|--|------|----------|----------|----------|--|--|
|                                                                                                                                | 1                                                                                                                                                                                                                                                                                                                                                                                                                                                                                                                                                                                                                                                                                                                                                                                                                                                                                                                                                                                                                                                                                                                                                                                                                                                                                                                                                                                                                     | 2        | 3        | 4        | 5        |   |   |      |          |  |  |  |  |      |          |          |  |  |  |      |          |          |          |  |  |     |          |          |          |          |  |     |          |          |          |          |          |      |          |          |          |          |          |      |          |          |          |          |          |      |          |          |          |          |          |  |   |   |   |  |  |      |          |  |  |  |  |      |          |          |  |  |  |      |          |          |          |  |  |
| 1 Re                                                                                                                           | 0.000000                                                                                                                                                                                                                                                                                                                                                                                                                                                                                                                                                                                                                                                                                                                                                                                                                                                                                                                                                                                                                                                                                                                                                                                                                                                                                                                                                                                                              |          |          |          |          |   |   |      |          |  |  |  |  |      |          |          |  |  |  |      |          |          |          |  |  |     |          |          |          |          |  |     |          |          |          |          |          |      |          |          |          |          |          |      |          |          |          |          |          |      |          |          |          |          |          |  |   |   |   |  |  |      |          |  |  |  |  |      |          |          |  |  |  |      |          |          |          |  |  |
| 2 Re                                                                                                                           | 2.606689                                                                                                                                                                                                                                                                                                                                                                                                                                                                                                                                                                                                                                                                                                                                                                                                                                                                                                                                                                                                                                                                                                                                                                                                                                                                                                                                                                                                              | 0.000000 |          |          |          |   |   |      |          |  |  |  |  |      |          |          |  |  |  |      |          |          |          |  |  |     |          |          |          |          |  |     |          |          |          |          |          |      |          |          |          |          |          |      |          |          |          |          |          |      |          |          |          |          |          |  |   |   |   |  |  |      |          |  |  |  |  |      |          |          |  |  |  |      |          |          |          |  |  |
| 3 B                                                                                                                            | 2.266248                                                                                                                                                                                                                                                                                                                                                                                                                                                                                                                                                                                                                                                                                                                                                                                                                                                                                                                                                                                                                                                                                                                                                                                                                                                                                                                                                                                                              | 2.127726 | 0.000000 |          |          |   |   |      |          |  |  |  |  |      |          |          |  |  |  |      |          |          |          |  |  |     |          |          |          |          |  |     |          |          |          |          |          |      |          |          |          |          |          |      |          |          |          |          |          |      |          |          |          |          |          |  |   |   |   |  |  |      |          |  |  |  |  |      |          |          |  |  |  |      |          |          |          |  |  |
| 4 B                                                                                                                            | 2.182033                                                                                                                                                                                                                                                                                                                                                                                                                                                                                                                                                                                                                                                                                                                                                                                                                                                                                                                                                                                                                                                                                                                                                                                                                                                                                                                                                                                                              | 3.462758 | 1.760184 | 0.000000 |          |   |   |      |          |  |  |  |  |      |          |          |  |  |  |      |          |          |          |  |  |     |          |          |          |          |  |     |          |          |          |          |          |      |          |          |          |          |          |      |          |          |          |          |          |      |          |          |          |          |          |  |   |   |   |  |  |      |          |  |  |  |  |      |          |          |  |  |  |      |          |          |          |  |  |
| 5 B                                                                                                                            | 2.192598                                                                                                                                                                                                                                                                                                                                                                                                                                                                                                                                                                                                                                                                                                                                                                                                                                                                                                                                                                                                                                                                                                                                                                                                                                                                                                                                                                                                              | 3.979775 | 3.068192 | 1.706789 | 0.000000 |   |   |      |          |  |  |  |  |      |          |          |  |  |  |      |          |          |          |  |  |     |          |          |          |          |  |     |          |          |          |          |          |      |          |          |          |          |          |      |          |          |          |          |          |      |          |          |          |          |          |  |   |   |   |  |  |      |          |  |  |  |  |      |          |          |  |  |  |      |          |          |          |  |  |
| 6 B                                                                                                                            | 2.184915                                                                                                                                                                                                                                                                                                                                                                                                                                                                                                                                                                                                                                                                                                                                                                                                                                                                                                                                                                                                                                                                                                                                                                                                                                                                                                                                                                                                              | 3.460037 | 3.562323 | 2.959055 | 1.706354 |   |   |      |          |  |  |  |  |      |          |          |  |  |  |      |          |          |          |  |  |     |          |          |          |          |  |     |          |          |          |          |          |      |          |          |          |          |          |      |          |          |          |          |          |      |          |          |          |          |          |  |   |   |   |  |  |      |          |  |  |  |  |      |          |          |  |  |  |      |          |          |          |  |  |
| 7 B                                                                                                                            | 2.267974                                                                                                                                                                                                                                                                                                                                                                                                                                                                                                                                                                                                                                                                                                                                                                                                                                                                                                                                                                                                                                                                                                                                                                                                                                                                                                                                                                                                              | 2.124583 | 3.241625 | 3.561145 | 3.065814 |   |   |      |          |  |  |  |  |      |          |          |  |  |  |      |          |          |          |  |  |     |          |          |          |          |  |     |          |          |          |          |          |      |          |          |          |          |          |      |          |          |          |          |          |      |          |          |          |          |          |  |   |   |   |  |  |      |          |  |  |  |  |      |          |          |  |  |  |      |          |          |          |  |  |
| 8 Re                                                                                                                           | 2.667326                                                                                                                                                                                                                                                                                                                                                                                                                                                                                                                                                                                                                                                                                                                                                                                                                                                                                                                                                                                                                                                                                                                                                                                                                                                                                                                                                                                                              | 2.604968 | 2.270887 | 2.179516 | 2.193784 |   |   |      |          |  |  |  |  |      |          |          |  |  |  |      |          |          |          |  |  |     |          |          |          |          |  |     |          |          |          |          |          |      |          |          |          |          |          |      |          |          |          |          |          |      |          |          |          |          |          |  |   |   |   |  |  |      |          |  |  |  |  |      |          |          |  |  |  |      |          |          |          |  |  |
|                                                                                                                                | 6                                                                                                                                                                                                                                                                                                                                                                                                                                                                                                                                                                                                                                                                                                                                                                                                                                                                                                                                                                                                                                                                                                                                                                                                                                                                                                                                                                                                                     | 7        | 8        |          |          |   |   |      |          |  |  |  |  |      |          |          |  |  |  |      |          |          |          |  |  |     |          |          |          |          |  |     |          |          |          |          |          |      |          |          |          |          |          |      |          |          |          |          |          |      |          |          |          |          |          |  |   |   |   |  |  |      |          |  |  |  |  |      |          |          |  |  |  |      |          |          |          |  |  |
| 6 B                                                                                                                            | 0.000000                                                                                                                                                                                                                                                                                                                                                                                                                                                                                                                                                                                                                                                                                                                                                                                                                                                                                                                                                                                                                                                                                                                                                                                                                                                                                                                                                                                                              |          |          |          |          |   |   |      |          |  |  |  |  |      |          |          |  |  |  |      |          |          |          |  |  |     |          |          |          |          |  |     |          |          |          |          |          |      |          |          |          |          |          |      |          |          |          |          |          |      |          |          |          |          |          |  |   |   |   |  |  |      |          |  |  |  |  |      |          |          |  |  |  |      |          |          |          |  |  |
| 7 B                                                                                                                            | 1.757660                                                                                                                                                                                                                                                                                                                                                                                                                                                                                                                                                                                                                                                                                                                                                                                                                                                                                                                                                                                                                                                                                                                                                                                                                                                                                                                                                                                                              | 0.000000 |          |          |          |   |   |      |          |  |  |  |  |      |          |          |  |  |  |      |          |          |          |  |  |     |          |          |          |          |  |     |          |          |          |          |          |      |          |          |          |          |          |      |          |          |          |          |          |      |          |          |          |          |          |  |   |   |   |  |  |      |          |  |  |  |  |      |          |          |  |  |  |      |          |          |          |  |  |
| 8 Re                                                                                                                           | 2.181244                                                                                                                                                                                                                                                                                                                                                                                                                                                                                                                                                                                                                                                                                                                                                                                                                                                                                                                                                                                                                                                                                                                                                                                                                                                                                                                                                                                                              | 2.272207 | 0.000000 |          |          |   |   |      |          |  |  |  |  |      |          |          |  |  |  |      |          |          |          |  |  |     |          |          |          |          |  |     |          |          |          |          |          |      |          |          |          |          |          |      |          |          |          |          |          |      |          |          |          |          |          |  |   |   |   |  |  |      |          |  |  |  |  |      |          |          |  |  |  |      |          |          |          |  |  |
|  <p>2. -942.9059558 +16.9 C<sub>s</sub></p>  | <table border="1"> <thead> <tr> <th></th> <th>1</th> <th>2</th> <th>3</th> <th>4</th> <th>5</th> </tr> </thead> <tbody> <tr> <td>1 Re</td> <td>0.000000</td> <td></td> <td></td> <td></td> <td></td> </tr> <tr> <td>2 B</td> <td>2.209782</td> <td>0.000000</td> <td></td> <td></td> <td></td> </tr> <tr> <td>3 Re</td> <td>2.644431</td> <td>3.082717</td> <td>0.000000</td> <td></td> <td></td> </tr> <tr> <td>4 B</td> <td>3.086059</td> <td>1.753152</td> <td>2.207170</td> <td>0.000000</td> <td></td> </tr> <tr> <td>5 B</td> <td>2.087311</td> <td>3.066222</td> <td>2.084589</td> <td>3.066740</td> <td>0.000000</td> </tr> <tr> <td>6 B</td> <td>2.261108</td> <td>1.750281</td> <td>2.261623</td> <td>1.751481</td> <td>3.287017</td> </tr> <tr> <td>7 Re</td> <td>2.950416</td> <td>2.228422</td> <td>2.953736</td> <td>2.235439</td> <td>2.073980</td> </tr> <tr> <td>8 B</td> <td>2.096501</td> <td>3.166686</td> <td>2.095520</td> <td>3.165672</td> <td>3.149387</td> </tr> <tr> <td></td> <td>6</td> <td>7</td> <td>8</td> <td></td> <td></td> </tr> <tr> <td>6 B</td> <td>0.000000</td> <td></td> <td></td> <td></td> <td></td> </tr> <tr> <td>7 Re</td> <td>3.292055</td> <td>0.000000</td> <td></td> <td></td> <td></td> </tr> <tr> <td>8 B</td> <td>1.800130</td> <td>4.172927</td> <td>0.000000</td> <td></td> <td></td> </tr> </tbody> </table> <p>Bridge Re7-H-B5 Re7-H 1.8954 B5-H 1.2760</p> |          | 1        | 2        | 3        | 4 | 5 | 1 Re | 0.000000 |  |  |  |  | 2 B  | 2.209782 | 0.000000 |  |  |  | 3 Re | 2.644431 | 3.082717 | 0.000000 |  |  | 4 B | 3.086059 | 1.753152 | 2.207170 | 0.000000 |  | 5 B | 2.087311 | 3.066222 | 2.084589 | 3.066740 | 0.000000 | 6 B  | 2.261108 | 1.750281 | 2.261623 | 1.751481 | 3.287017 | 7 Re | 2.950416 | 2.228422 | 2.953736 | 2.235439 | 2.073980 | 8 B  | 2.096501 | 3.166686 | 2.095520 | 3.165672 | 3.149387 |  | 6 | 7 | 8 |  |  | 6 B  | 0.000000 |  |  |  |  | 7 Re | 3.292055 | 0.000000 |  |  |  | 8 B  | 1.800130 | 4.172927 | 0.000000 |  |  |
|                                                                                                                                | 1                                                                                                                                                                                                                                                                                                                                                                                                                                                                                                                                                                                                                                                                                                                                                                                                                                                                                                                                                                                                                                                                                                                                                                                                                                                                                                                                                                                                                     | 2        | 3        | 4        | 5        |   |   |      |          |  |  |  |  |      |          |          |  |  |  |      |          |          |          |  |  |     |          |          |          |          |  |     |          |          |          |          |          |      |          |          |          |          |          |      |          |          |          |          |          |      |          |          |          |          |          |  |   |   |   |  |  |      |          |  |  |  |  |      |          |          |  |  |  |      |          |          |          |  |  |
| 1 Re                                                                                                                           | 0.000000                                                                                                                                                                                                                                                                                                                                                                                                                                                                                                                                                                                                                                                                                                                                                                                                                                                                                                                                                                                                                                                                                                                                                                                                                                                                                                                                                                                                              |          |          |          |          |   |   |      |          |  |  |  |  |      |          |          |  |  |  |      |          |          |          |  |  |     |          |          |          |          |  |     |          |          |          |          |          |      |          |          |          |          |          |      |          |          |          |          |          |      |          |          |          |          |          |  |   |   |   |  |  |      |          |  |  |  |  |      |          |          |  |  |  |      |          |          |          |  |  |
| 2 B                                                                                                                            | 2.209782                                                                                                                                                                                                                                                                                                                                                                                                                                                                                                                                                                                                                                                                                                                                                                                                                                                                                                                                                                                                                                                                                                                                                                                                                                                                                                                                                                                                              | 0.000000 |          |          |          |   |   |      |          |  |  |  |  |      |          |          |  |  |  |      |          |          |          |  |  |     |          |          |          |          |  |     |          |          |          |          |          |      |          |          |          |          |          |      |          |          |          |          |          |      |          |          |          |          |          |  |   |   |   |  |  |      |          |  |  |  |  |      |          |          |  |  |  |      |          |          |          |  |  |
| 3 Re                                                                                                                           | 2.644431                                                                                                                                                                                                                                                                                                                                                                                                                                                                                                                                                                                                                                                                                                                                                                                                                                                                                                                                                                                                                                                                                                                                                                                                                                                                                                                                                                                                              | 3.082717 | 0.000000 |          |          |   |   |      |          |  |  |  |  |      |          |          |  |  |  |      |          |          |          |  |  |     |          |          |          |          |  |     |          |          |          |          |          |      |          |          |          |          |          |      |          |          |          |          |          |      |          |          |          |          |          |  |   |   |   |  |  |      |          |  |  |  |  |      |          |          |  |  |  |      |          |          |          |  |  |
| 4 B                                                                                                                            | 3.086059                                                                                                                                                                                                                                                                                                                                                                                                                                                                                                                                                                                                                                                                                                                                                                                                                                                                                                                                                                                                                                                                                                                                                                                                                                                                                                                                                                                                              | 1.753152 | 2.207170 | 0.000000 |          |   |   |      |          |  |  |  |  |      |          |          |  |  |  |      |          |          |          |  |  |     |          |          |          |          |  |     |          |          |          |          |          |      |          |          |          |          |          |      |          |          |          |          |          |      |          |          |          |          |          |  |   |   |   |  |  |      |          |  |  |  |  |      |          |          |  |  |  |      |          |          |          |  |  |
| 5 B                                                                                                                            | 2.087311                                                                                                                                                                                                                                                                                                                                                                                                                                                                                                                                                                                                                                                                                                                                                                                                                                                                                                                                                                                                                                                                                                                                                                                                                                                                                                                                                                                                              | 3.066222 | 2.084589 | 3.066740 | 0.000000 |   |   |      |          |  |  |  |  |      |          |          |  |  |  |      |          |          |          |  |  |     |          |          |          |          |  |     |          |          |          |          |          |      |          |          |          |          |          |      |          |          |          |          |          |      |          |          |          |          |          |  |   |   |   |  |  |      |          |  |  |  |  |      |          |          |  |  |  |      |          |          |          |  |  |
| 6 B                                                                                                                            | 2.261108                                                                                                                                                                                                                                                                                                                                                                                                                                                                                                                                                                                                                                                                                                                                                                                                                                                                                                                                                                                                                                                                                                                                                                                                                                                                                                                                                                                                              | 1.750281 | 2.261623 | 1.751481 | 3.287017 |   |   |      |          |  |  |  |  |      |          |          |  |  |  |      |          |          |          |  |  |     |          |          |          |          |  |     |          |          |          |          |          |      |          |          |          |          |          |      |          |          |          |          |          |      |          |          |          |          |          |  |   |   |   |  |  |      |          |  |  |  |  |      |          |          |  |  |  |      |          |          |          |  |  |
| 7 Re                                                                                                                           | 2.950416                                                                                                                                                                                                                                                                                                                                                                                                                                                                                                                                                                                                                                                                                                                                                                                                                                                                                                                                                                                                                                                                                                                                                                                                                                                                                                                                                                                                              | 2.228422 | 2.953736 | 2.235439 | 2.073980 |   |   |      |          |  |  |  |  |      |          |          |  |  |  |      |          |          |          |  |  |     |          |          |          |          |  |     |          |          |          |          |          |      |          |          |          |          |          |      |          |          |          |          |          |      |          |          |          |          |          |  |   |   |   |  |  |      |          |  |  |  |  |      |          |          |  |  |  |      |          |          |          |  |  |
| 8 B                                                                                                                            | 2.096501                                                                                                                                                                                                                                                                                                                                                                                                                                                                                                                                                                                                                                                                                                                                                                                                                                                                                                                                                                                                                                                                                                                                                                                                                                                                                                                                                                                                              | 3.166686 | 2.095520 | 3.165672 | 3.149387 |   |   |      |          |  |  |  |  |      |          |          |  |  |  |      |          |          |          |  |  |     |          |          |          |          |  |     |          |          |          |          |          |      |          |          |          |          |          |      |          |          |          |          |          |      |          |          |          |          |          |  |   |   |   |  |  |      |          |  |  |  |  |      |          |          |  |  |  |      |          |          |          |  |  |
|                                                                                                                                | 6                                                                                                                                                                                                                                                                                                                                                                                                                                                                                                                                                                                                                                                                                                                                                                                                                                                                                                                                                                                                                                                                                                                                                                                                                                                                                                                                                                                                                     | 7        | 8        |          |          |   |   |      |          |  |  |  |  |      |          |          |  |  |  |      |          |          |          |  |  |     |          |          |          |          |  |     |          |          |          |          |          |      |          |          |          |          |          |      |          |          |          |          |          |      |          |          |          |          |          |  |   |   |   |  |  |      |          |  |  |  |  |      |          |          |  |  |  |      |          |          |          |  |  |
| 6 B                                                                                                                            | 0.000000                                                                                                                                                                                                                                                                                                                                                                                                                                                                                                                                                                                                                                                                                                                                                                                                                                                                                                                                                                                                                                                                                                                                                                                                                                                                                                                                                                                                              |          |          |          |          |   |   |      |          |  |  |  |  |      |          |          |  |  |  |      |          |          |          |  |  |     |          |          |          |          |  |     |          |          |          |          |          |      |          |          |          |          |          |      |          |          |          |          |          |      |          |          |          |          |          |  |   |   |   |  |  |      |          |  |  |  |  |      |          |          |  |  |  |      |          |          |          |  |  |
| 7 Re                                                                                                                           | 3.292055                                                                                                                                                                                                                                                                                                                                                                                                                                                                                                                                                                                                                                                                                                                                                                                                                                                                                                                                                                                                                                                                                                                                                                                                                                                                                                                                                                                                              | 0.000000 |          |          |          |   |   |      |          |  |  |  |  |      |          |          |  |  |  |      |          |          |          |  |  |     |          |          |          |          |  |     |          |          |          |          |          |      |          |          |          |          |          |      |          |          |          |          |          |      |          |          |          |          |          |  |   |   |   |  |  |      |          |  |  |  |  |      |          |          |  |  |  |      |          |          |          |  |  |
| 8 B                                                                                                                            | 1.800130                                                                                                                                                                                                                                                                                                                                                                                                                                                                                                                                                                                                                                                                                                                                                                                                                                                                                                                                                                                                                                                                                                                                                                                                                                                                                                                                                                                                              | 4.172927 | 0.000000 |          |          |   |   |      |          |  |  |  |  |      |          |          |  |  |  |      |          |          |          |  |  |     |          |          |          |          |  |     |          |          |          |          |          |      |          |          |          |          |          |      |          |          |          |          |          |      |          |          |          |          |          |  |   |   |   |  |  |      |          |  |  |  |  |      |          |          |  |  |  |      |          |          |          |  |  |
|  <p>3. -942.9009922 +20.0 C<sub>1</sub></p> | <table border="1"> <thead> <tr> <th></th> <th>1</th> <th>2</th> <th>3</th> <th>4</th> <th>5</th> </tr> </thead> <tbody> <tr> <td>1 Re</td> <td>0.000000</td> <td></td> <td></td> <td></td> <td></td> </tr> <tr> <td>2 Re</td> <td>2.506977</td> <td>0.000000</td> <td></td> <td></td> <td></td> </tr> <tr> <td>3 B</td> <td>2.289678</td> <td>2.093267</td> <td>0.000000</td> <td></td> <td></td> </tr> <tr> <td>4 B</td> <td>2.250853</td> <td>3.212546</td> <td>1.698914</td> <td>0.000000</td> <td></td> </tr> <tr> <td>5 B</td> <td>2.294622</td> <td>3.231031</td> <td>2.819007</td> <td>1.720833</td> <td>0.000000</td> </tr> <tr> <td>6 Re</td> <td>2.956011</td> <td>2.420592</td> <td>3.458713</td> <td>3.376091</td> <td>2.150973</td> </tr> <tr> <td>7 B</td> <td>2.155588</td> <td>2.405490</td> <td>3.675705</td> <td>3.881361</td> <td>3.028589</td> </tr> <tr> <td>8 B</td> <td>2.838405</td> <td>2.393056</td> <td>1.852474</td> <td>1.710844</td> <td>1.774691</td> </tr> <tr> <td></td> <td>6</td> <td>7</td> <td>8</td> <td></td> <td></td> </tr> <tr> <td>6 Re</td> <td>0.000000</td> <td></td> <td></td> <td></td> <td></td> </tr> <tr> <td>7 B</td> <td>2.050308</td> <td>0.000000</td> <td></td> <td></td> <td></td> </tr> <tr> <td>8 B</td> <td>2.308387</td> <td>3.526062</td> <td>0.000000</td> <td></td> <td></td> </tr> </tbody> </table>                                                 |          | 1        | 2        | 3        | 4 | 5 | 1 Re | 0.000000 |  |  |  |  | 2 Re | 2.506977 | 0.000000 |  |  |  | 3 B  | 2.289678 | 2.093267 | 0.000000 |  |  | 4 B | 2.250853 | 3.212546 | 1.698914 | 0.000000 |  | 5 B | 2.294622 | 3.231031 | 2.819007 | 1.720833 | 0.000000 | 6 Re | 2.956011 | 2.420592 | 3.458713 | 3.376091 | 2.150973 | 7 B  | 2.155588 | 2.405490 | 3.675705 | 3.881361 | 3.028589 | 8 B  | 2.838405 | 2.393056 | 1.852474 | 1.710844 | 1.774691 |  | 6 | 7 | 8 |  |  | 6 Re | 0.000000 |  |  |  |  | 7 B  | 2.050308 | 0.000000 |  |  |  | 8 B  | 2.308387 | 3.526062 | 0.000000 |  |  |
|                                                                                                                                | 1                                                                                                                                                                                                                                                                                                                                                                                                                                                                                                                                                                                                                                                                                                                                                                                                                                                                                                                                                                                                                                                                                                                                                                                                                                                                                                                                                                                                                     | 2        | 3        | 4        | 5        |   |   |      |          |  |  |  |  |      |          |          |  |  |  |      |          |          |          |  |  |     |          |          |          |          |  |     |          |          |          |          |          |      |          |          |          |          |          |      |          |          |          |          |          |      |          |          |          |          |          |  |   |   |   |  |  |      |          |  |  |  |  |      |          |          |  |  |  |      |          |          |          |  |  |
| 1 Re                                                                                                                           | 0.000000                                                                                                                                                                                                                                                                                                                                                                                                                                                                                                                                                                                                                                                                                                                                                                                                                                                                                                                                                                                                                                                                                                                                                                                                                                                                                                                                                                                                              |          |          |          |          |   |   |      |          |  |  |  |  |      |          |          |  |  |  |      |          |          |          |  |  |     |          |          |          |          |  |     |          |          |          |          |          |      |          |          |          |          |          |      |          |          |          |          |          |      |          |          |          |          |          |  |   |   |   |  |  |      |          |  |  |  |  |      |          |          |  |  |  |      |          |          |          |  |  |
| 2 Re                                                                                                                           | 2.506977                                                                                                                                                                                                                                                                                                                                                                                                                                                                                                                                                                                                                                                                                                                                                                                                                                                                                                                                                                                                                                                                                                                                                                                                                                                                                                                                                                                                              | 0.000000 |          |          |          |   |   |      |          |  |  |  |  |      |          |          |  |  |  |      |          |          |          |  |  |     |          |          |          |          |  |     |          |          |          |          |          |      |          |          |          |          |          |      |          |          |          |          |          |      |          |          |          |          |          |  |   |   |   |  |  |      |          |  |  |  |  |      |          |          |  |  |  |      |          |          |          |  |  |
| 3 B                                                                                                                            | 2.289678                                                                                                                                                                                                                                                                                                                                                                                                                                                                                                                                                                                                                                                                                                                                                                                                                                                                                                                                                                                                                                                                                                                                                                                                                                                                                                                                                                                                              | 2.093267 | 0.000000 |          |          |   |   |      |          |  |  |  |  |      |          |          |  |  |  |      |          |          |          |  |  |     |          |          |          |          |  |     |          |          |          |          |          |      |          |          |          |          |          |      |          |          |          |          |          |      |          |          |          |          |          |  |   |   |   |  |  |      |          |  |  |  |  |      |          |          |  |  |  |      |          |          |          |  |  |
| 4 B                                                                                                                            | 2.250853                                                                                                                                                                                                                                                                                                                                                                                                                                                                                                                                                                                                                                                                                                                                                                                                                                                                                                                                                                                                                                                                                                                                                                                                                                                                                                                                                                                                              | 3.212546 | 1.698914 | 0.000000 |          |   |   |      |          |  |  |  |  |      |          |          |  |  |  |      |          |          |          |  |  |     |          |          |          |          |  |     |          |          |          |          |          |      |          |          |          |          |          |      |          |          |          |          |          |      |          |          |          |          |          |  |   |   |   |  |  |      |          |  |  |  |  |      |          |          |  |  |  |      |          |          |          |  |  |
| 5 B                                                                                                                            | 2.294622                                                                                                                                                                                                                                                                                                                                                                                                                                                                                                                                                                                                                                                                                                                                                                                                                                                                                                                                                                                                                                                                                                                                                                                                                                                                                                                                                                                                              | 3.231031 | 2.819007 | 1.720833 | 0.000000 |   |   |      |          |  |  |  |  |      |          |          |  |  |  |      |          |          |          |  |  |     |          |          |          |          |  |     |          |          |          |          |          |      |          |          |          |          |          |      |          |          |          |          |          |      |          |          |          |          |          |  |   |   |   |  |  |      |          |  |  |  |  |      |          |          |  |  |  |      |          |          |          |  |  |
| 6 Re                                                                                                                           | 2.956011                                                                                                                                                                                                                                                                                                                                                                                                                                                                                                                                                                                                                                                                                                                                                                                                                                                                                                                                                                                                                                                                                                                                                                                                                                                                                                                                                                                                              | 2.420592 | 3.458713 | 3.376091 | 2.150973 |   |   |      |          |  |  |  |  |      |          |          |  |  |  |      |          |          |          |  |  |     |          |          |          |          |  |     |          |          |          |          |          |      |          |          |          |          |          |      |          |          |          |          |          |      |          |          |          |          |          |  |   |   |   |  |  |      |          |  |  |  |  |      |          |          |  |  |  |      |          |          |          |  |  |
| 7 B                                                                                                                            | 2.155588                                                                                                                                                                                                                                                                                                                                                                                                                                                                                                                                                                                                                                                                                                                                                                                                                                                                                                                                                                                                                                                                                                                                                                                                                                                                                                                                                                                                              | 2.405490 | 3.675705 | 3.881361 | 3.028589 |   |   |      |          |  |  |  |  |      |          |          |  |  |  |      |          |          |          |  |  |     |          |          |          |          |  |     |          |          |          |          |          |      |          |          |          |          |          |      |          |          |          |          |          |      |          |          |          |          |          |  |   |   |   |  |  |      |          |  |  |  |  |      |          |          |  |  |  |      |          |          |          |  |  |
| 8 B                                                                                                                            | 2.838405                                                                                                                                                                                                                                                                                                                                                                                                                                                                                                                                                                                                                                                                                                                                                                                                                                                                                                                                                                                                                                                                                                                                                                                                                                                                                                                                                                                                              | 2.393056 | 1.852474 | 1.710844 | 1.774691 |   |   |      |          |  |  |  |  |      |          |          |  |  |  |      |          |          |          |  |  |     |          |          |          |          |  |     |          |          |          |          |          |      |          |          |          |          |          |      |          |          |          |          |          |      |          |          |          |          |          |  |   |   |   |  |  |      |          |  |  |  |  |      |          |          |  |  |  |      |          |          |          |  |  |
|                                                                                                                                | 6                                                                                                                                                                                                                                                                                                                                                                                                                                                                                                                                                                                                                                                                                                                                                                                                                                                                                                                                                                                                                                                                                                                                                                                                                                                                                                                                                                                                                     | 7        | 8        |          |          |   |   |      |          |  |  |  |  |      |          |          |  |  |  |      |          |          |          |  |  |     |          |          |          |          |  |     |          |          |          |          |          |      |          |          |          |          |          |      |          |          |          |          |          |      |          |          |          |          |          |  |   |   |   |  |  |      |          |  |  |  |  |      |          |          |  |  |  |      |          |          |          |  |  |
| 6 Re                                                                                                                           | 0.000000                                                                                                                                                                                                                                                                                                                                                                                                                                                                                                                                                                                                                                                                                                                                                                                                                                                                                                                                                                                                                                                                                                                                                                                                                                                                                                                                                                                                              |          |          |          |          |   |   |      |          |  |  |  |  |      |          |          |  |  |  |      |          |          |          |  |  |     |          |          |          |          |  |     |          |          |          |          |          |      |          |          |          |          |          |      |          |          |          |          |          |      |          |          |          |          |          |  |   |   |   |  |  |      |          |  |  |  |  |      |          |          |  |  |  |      |          |          |          |  |  |
| 7 B                                                                                                                            | 2.050308                                                                                                                                                                                                                                                                                                                                                                                                                                                                                                                                                                                                                                                                                                                                                                                                                                                                                                                                                                                                                                                                                                                                                                                                                                                                                                                                                                                                              | 0.000000 |          |          |          |   |   |      |          |  |  |  |  |      |          |          |  |  |  |      |          |          |          |  |  |     |          |          |          |          |  |     |          |          |          |          |          |      |          |          |          |          |          |      |          |          |          |          |          |      |          |          |          |          |          |  |   |   |   |  |  |      |          |  |  |  |  |      |          |          |  |  |  |      |          |          |          |  |  |
| 8 B                                                                                                                            | 2.308387                                                                                                                                                                                                                                                                                                                                                                                                                                                                                                                                                                                                                                                                                                                                                                                                                                                                                                                                                                                                                                                                                                                                                                                                                                                                                                                                                                                                              | 3.526062 | 0.000000 |          |          |   |   |      |          |  |  |  |  |      |          |          |  |  |  |      |          |          |          |  |  |     |          |          |          |          |  |     |          |          |          |          |          |      |          |          |          |          |          |      |          |          |          |          |          |      |          |          |          |          |          |  |   |   |   |  |  |      |          |  |  |  |  |      |          |          |  |  |  |      |          |          |          |  |  |

| 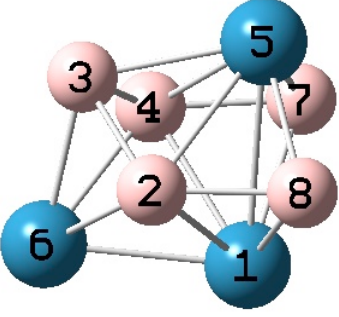 <p>4. -942.8989368 +21.3 C<sub>s</sub></p>   | <table border="1"> <thead> <tr> <th></th> <th>1</th> <th>2</th> <th>3</th> <th>4</th> <th>5</th> </tr> </thead> <tbody> <tr><td>1 Re</td><td>0.000000</td><td></td><td></td><td></td><td></td></tr> <tr><td>2 B</td><td>2.283111</td><td>0.000000</td><td></td><td></td><td></td></tr> <tr><td>3 B</td><td>3.046328</td><td>1.807167</td><td>0.000000</td><td></td><td></td></tr> <tr><td>4 B</td><td>2.283488</td><td>2.695140</td><td>1.808162</td><td>0.000000</td><td></td></tr> <tr><td>5 Re</td><td>2.791277</td><td>2.310384</td><td>2.172569</td><td>2.310914</td><td>0.000000</td></tr> <tr><td>6 Re</td><td>2.406570</td><td>2.194688</td><td>2.135188</td><td>2.194907</td><td>3.608970</td></tr> <tr><td>7 B</td><td>2.212445</td><td>3.365429</td><td>3.110604</td><td>1.775887</td><td>2.048837</td></tr> <tr><td>8 B</td><td>2.213571</td><td>1.774243</td><td>3.109587</td><td>3.366737</td><td>2.049524</td></tr> <tr> <td></td> <td>6</td> <td>7</td> <td>8</td> <td></td> <td></td> </tr> <tr><td>6 Re</td><td>0.000000</td><td></td><td></td><td></td><td></td></tr> <tr><td>7 B</td><td>3.597320</td><td>0.000000</td><td></td><td></td><td></td></tr> <tr><td>8 B</td><td>3.596828</td><td>3.034966</td><td>0.000000</td><td></td><td></td></tr> </tbody> </table> |          | 1        | 2        | 3        | 4 | 5 | 1 Re | 0.000000 |  |  |  |  | 2 B  | 2.283111 | 0.000000 |  |  |  | 3 B | 3.046328 | 1.807167 | 0.000000 |  |  | 4 B  | 2.283488 | 2.695140 | 1.808162 | 0.000000 |  | 5 Re | 2.791277 | 2.310384 | 2.172569 | 2.310914 | 0.000000 | 6 Re | 2.406570 | 2.194688 | 2.135188 | 2.194907 | 3.608970 | 7 B | 2.212445 | 3.365429 | 3.110604 | 1.775887 | 2.048837 | 8 B | 2.213571 | 1.774243 | 3.109587 | 3.366737 | 2.049524 |  | 6 | 7 | 8 |  |  | 6 Re | 0.000000 |  |  |  |  | 7 B | 3.597320 | 0.000000 |  |  |  | 8 B | 3.596828 | 3.034966 | 0.000000 |  |  |
|--------------------------------------------------------------------------------------------------------------------------------|------------------------------------------------------------------------------------------------------------------------------------------------------------------------------------------------------------------------------------------------------------------------------------------------------------------------------------------------------------------------------------------------------------------------------------------------------------------------------------------------------------------------------------------------------------------------------------------------------------------------------------------------------------------------------------------------------------------------------------------------------------------------------------------------------------------------------------------------------------------------------------------------------------------------------------------------------------------------------------------------------------------------------------------------------------------------------------------------------------------------------------------------------------------------------------------------------------------------------------------------------------------------------------------|----------|----------|----------|----------|---|---|------|----------|--|--|--|--|------|----------|----------|--|--|--|-----|----------|----------|----------|--|--|------|----------|----------|----------|----------|--|------|----------|----------|----------|----------|----------|------|----------|----------|----------|----------|----------|-----|----------|----------|----------|----------|----------|-----|----------|----------|----------|----------|----------|--|---|---|---|--|--|------|----------|--|--|--|--|-----|----------|----------|--|--|--|-----|----------|----------|----------|--|--|
|                                                                                                                                | 1                                                                                                                                                                                                                                                                                                                                                                                                                                                                                                                                                                                                                                                                                                                                                                                                                                                                                                                                                                                                                                                                                                                                                                                                                                                                                        | 2        | 3        | 4        | 5        |   |   |      |          |  |  |  |  |      |          |          |  |  |  |     |          |          |          |  |  |      |          |          |          |          |  |      |          |          |          |          |          |      |          |          |          |          |          |     |          |          |          |          |          |     |          |          |          |          |          |  |   |   |   |  |  |      |          |  |  |  |  |     |          |          |  |  |  |     |          |          |          |  |  |
| 1 Re                                                                                                                           | 0.000000                                                                                                                                                                                                                                                                                                                                                                                                                                                                                                                                                                                                                                                                                                                                                                                                                                                                                                                                                                                                                                                                                                                                                                                                                                                                                 |          |          |          |          |   |   |      |          |  |  |  |  |      |          |          |  |  |  |     |          |          |          |  |  |      |          |          |          |          |  |      |          |          |          |          |          |      |          |          |          |          |          |     |          |          |          |          |          |     |          |          |          |          |          |  |   |   |   |  |  |      |          |  |  |  |  |     |          |          |  |  |  |     |          |          |          |  |  |
| 2 B                                                                                                                            | 2.283111                                                                                                                                                                                                                                                                                                                                                                                                                                                                                                                                                                                                                                                                                                                                                                                                                                                                                                                                                                                                                                                                                                                                                                                                                                                                                 | 0.000000 |          |          |          |   |   |      |          |  |  |  |  |      |          |          |  |  |  |     |          |          |          |  |  |      |          |          |          |          |  |      |          |          |          |          |          |      |          |          |          |          |          |     |          |          |          |          |          |     |          |          |          |          |          |  |   |   |   |  |  |      |          |  |  |  |  |     |          |          |  |  |  |     |          |          |          |  |  |
| 3 B                                                                                                                            | 3.046328                                                                                                                                                                                                                                                                                                                                                                                                                                                                                                                                                                                                                                                                                                                                                                                                                                                                                                                                                                                                                                                                                                                                                                                                                                                                                 | 1.807167 | 0.000000 |          |          |   |   |      |          |  |  |  |  |      |          |          |  |  |  |     |          |          |          |  |  |      |          |          |          |          |  |      |          |          |          |          |          |      |          |          |          |          |          |     |          |          |          |          |          |     |          |          |          |          |          |  |   |   |   |  |  |      |          |  |  |  |  |     |          |          |  |  |  |     |          |          |          |  |  |
| 4 B                                                                                                                            | 2.283488                                                                                                                                                                                                                                                                                                                                                                                                                                                                                                                                                                                                                                                                                                                                                                                                                                                                                                                                                                                                                                                                                                                                                                                                                                                                                 | 2.695140 | 1.808162 | 0.000000 |          |   |   |      |          |  |  |  |  |      |          |          |  |  |  |     |          |          |          |  |  |      |          |          |          |          |  |      |          |          |          |          |          |      |          |          |          |          |          |     |          |          |          |          |          |     |          |          |          |          |          |  |   |   |   |  |  |      |          |  |  |  |  |     |          |          |  |  |  |     |          |          |          |  |  |
| 5 Re                                                                                                                           | 2.791277                                                                                                                                                                                                                                                                                                                                                                                                                                                                                                                                                                                                                                                                                                                                                                                                                                                                                                                                                                                                                                                                                                                                                                                                                                                                                 | 2.310384 | 2.172569 | 2.310914 | 0.000000 |   |   |      |          |  |  |  |  |      |          |          |  |  |  |     |          |          |          |  |  |      |          |          |          |          |  |      |          |          |          |          |          |      |          |          |          |          |          |     |          |          |          |          |          |     |          |          |          |          |          |  |   |   |   |  |  |      |          |  |  |  |  |     |          |          |  |  |  |     |          |          |          |  |  |
| 6 Re                                                                                                                           | 2.406570                                                                                                                                                                                                                                                                                                                                                                                                                                                                                                                                                                                                                                                                                                                                                                                                                                                                                                                                                                                                                                                                                                                                                                                                                                                                                 | 2.194688 | 2.135188 | 2.194907 | 3.608970 |   |   |      |          |  |  |  |  |      |          |          |  |  |  |     |          |          |          |  |  |      |          |          |          |          |  |      |          |          |          |          |          |      |          |          |          |          |          |     |          |          |          |          |          |     |          |          |          |          |          |  |   |   |   |  |  |      |          |  |  |  |  |     |          |          |  |  |  |     |          |          |          |  |  |
| 7 B                                                                                                                            | 2.212445                                                                                                                                                                                                                                                                                                                                                                                                                                                                                                                                                                                                                                                                                                                                                                                                                                                                                                                                                                                                                                                                                                                                                                                                                                                                                 | 3.365429 | 3.110604 | 1.775887 | 2.048837 |   |   |      |          |  |  |  |  |      |          |          |  |  |  |     |          |          |          |  |  |      |          |          |          |          |  |      |          |          |          |          |          |      |          |          |          |          |          |     |          |          |          |          |          |     |          |          |          |          |          |  |   |   |   |  |  |      |          |  |  |  |  |     |          |          |  |  |  |     |          |          |          |  |  |
| 8 B                                                                                                                            | 2.213571                                                                                                                                                                                                                                                                                                                                                                                                                                                                                                                                                                                                                                                                                                                                                                                                                                                                                                                                                                                                                                                                                                                                                                                                                                                                                 | 1.774243 | 3.109587 | 3.366737 | 2.049524 |   |   |      |          |  |  |  |  |      |          |          |  |  |  |     |          |          |          |  |  |      |          |          |          |          |  |      |          |          |          |          |          |      |          |          |          |          |          |     |          |          |          |          |          |     |          |          |          |          |          |  |   |   |   |  |  |      |          |  |  |  |  |     |          |          |  |  |  |     |          |          |          |  |  |
|                                                                                                                                | 6                                                                                                                                                                                                                                                                                                                                                                                                                                                                                                                                                                                                                                                                                                                                                                                                                                                                                                                                                                                                                                                                                                                                                                                                                                                                                        | 7        | 8        |          |          |   |   |      |          |  |  |  |  |      |          |          |  |  |  |     |          |          |          |  |  |      |          |          |          |          |  |      |          |          |          |          |          |      |          |          |          |          |          |     |          |          |          |          |          |     |          |          |          |          |          |  |   |   |   |  |  |      |          |  |  |  |  |     |          |          |  |  |  |     |          |          |          |  |  |
| 6 Re                                                                                                                           | 0.000000                                                                                                                                                                                                                                                                                                                                                                                                                                                                                                                                                                                                                                                                                                                                                                                                                                                                                                                                                                                                                                                                                                                                                                                                                                                                                 |          |          |          |          |   |   |      |          |  |  |  |  |      |          |          |  |  |  |     |          |          |          |  |  |      |          |          |          |          |  |      |          |          |          |          |          |      |          |          |          |          |          |     |          |          |          |          |          |     |          |          |          |          |          |  |   |   |   |  |  |      |          |  |  |  |  |     |          |          |  |  |  |     |          |          |          |  |  |
| 7 B                                                                                                                            | 3.597320                                                                                                                                                                                                                                                                                                                                                                                                                                                                                                                                                                                                                                                                                                                                                                                                                                                                                                                                                                                                                                                                                                                                                                                                                                                                                 | 0.000000 |          |          |          |   |   |      |          |  |  |  |  |      |          |          |  |  |  |     |          |          |          |  |  |      |          |          |          |          |  |      |          |          |          |          |          |      |          |          |          |          |          |     |          |          |          |          |          |     |          |          |          |          |          |  |   |   |   |  |  |      |          |  |  |  |  |     |          |          |  |  |  |     |          |          |          |  |  |
| 8 B                                                                                                                            | 3.596828                                                                                                                                                                                                                                                                                                                                                                                                                                                                                                                                                                                                                                                                                                                                                                                                                                                                                                                                                                                                                                                                                                                                                                                                                                                                                 | 3.034966 | 0.000000 |          |          |   |   |      |          |  |  |  |  |      |          |          |  |  |  |     |          |          |          |  |  |      |          |          |          |          |  |      |          |          |          |          |          |      |          |          |          |          |          |     |          |          |          |          |          |     |          |          |          |          |          |  |   |   |   |  |  |      |          |  |  |  |  |     |          |          |  |  |  |     |          |          |          |  |  |
|  <p>5. -942.8951018 +23.7 C<sub>s</sub></p>   | <table border="1"> <thead> <tr> <th></th> <th>1</th> <th>2</th> <th>3</th> <th>4</th> <th>5</th> </tr> </thead> <tbody> <tr><td>1 B</td><td>0.000000</td><td></td><td></td><td></td><td></td></tr> <tr><td>2 Re</td><td>2.127996</td><td>0.000000</td><td></td><td></td><td></td></tr> <tr><td>3 B</td><td>1.808431</td><td>3.272550</td><td>0.000000</td><td></td><td></td></tr> <tr><td>4 Re</td><td>3.288434</td><td>3.455091</td><td>2.121100</td><td>0.000000</td><td></td></tr> <tr><td>5 B</td><td>1.735029</td><td>2.357487</td><td>1.734757</td><td>2.360505</td><td>0.000000</td></tr> <tr><td>6 Re</td><td>2.281935</td><td>2.390755</td><td>2.288203</td><td>2.439991</td><td>2.818991</td></tr> <tr><td>7 B</td><td>3.427645</td><td>2.205165</td><td>3.409828</td><td>2.199214</td><td>2.851142</td></tr> <tr><td>8 B</td><td>3.017705</td><td>2.214497</td><td>3.009892</td><td>2.215203</td><td>1.719221</td></tr> <tr> <td></td> <td>6</td> <td>7</td> <td>8</td> <td></td> <td></td> </tr> <tr><td>6 Re</td><td>0.000000</td><td></td><td></td><td></td><td></td></tr> <tr><td>7 B</td><td>2.267013</td><td>0.000000</td><td></td><td></td><td></td></tr> <tr><td>8 B</td><td>3.067920</td><td>1.720527</td><td>0.000000</td><td></td><td></td></tr> </tbody> </table> |          | 1        | 2        | 3        | 4 | 5 | 1 B  | 0.000000 |  |  |  |  | 2 Re | 2.127996 | 0.000000 |  |  |  | 3 B | 1.808431 | 3.272550 | 0.000000 |  |  | 4 Re | 3.288434 | 3.455091 | 2.121100 | 0.000000 |  | 5 B  | 1.735029 | 2.357487 | 1.734757 | 2.360505 | 0.000000 | 6 Re | 2.281935 | 2.390755 | 2.288203 | 2.439991 | 2.818991 | 7 B | 3.427645 | 2.205165 | 3.409828 | 2.199214 | 2.851142 | 8 B | 3.017705 | 2.214497 | 3.009892 | 2.215203 | 1.719221 |  | 6 | 7 | 8 |  |  | 6 Re | 0.000000 |  |  |  |  | 7 B | 2.267013 | 0.000000 |  |  |  | 8 B | 3.067920 | 1.720527 | 0.000000 |  |  |
|                                                                                                                                | 1                                                                                                                                                                                                                                                                                                                                                                                                                                                                                                                                                                                                                                                                                                                                                                                                                                                                                                                                                                                                                                                                                                                                                                                                                                                                                        | 2        | 3        | 4        | 5        |   |   |      |          |  |  |  |  |      |          |          |  |  |  |     |          |          |          |  |  |      |          |          |          |          |  |      |          |          |          |          |          |      |          |          |          |          |          |     |          |          |          |          |          |     |          |          |          |          |          |  |   |   |   |  |  |      |          |  |  |  |  |     |          |          |  |  |  |     |          |          |          |  |  |
| 1 B                                                                                                                            | 0.000000                                                                                                                                                                                                                                                                                                                                                                                                                                                                                                                                                                                                                                                                                                                                                                                                                                                                                                                                                                                                                                                                                                                                                                                                                                                                                 |          |          |          |          |   |   |      |          |  |  |  |  |      |          |          |  |  |  |     |          |          |          |  |  |      |          |          |          |          |  |      |          |          |          |          |          |      |          |          |          |          |          |     |          |          |          |          |          |     |          |          |          |          |          |  |   |   |   |  |  |      |          |  |  |  |  |     |          |          |  |  |  |     |          |          |          |  |  |
| 2 Re                                                                                                                           | 2.127996                                                                                                                                                                                                                                                                                                                                                                                                                                                                                                                                                                                                                                                                                                                                                                                                                                                                                                                                                                                                                                                                                                                                                                                                                                                                                 | 0.000000 |          |          |          |   |   |      |          |  |  |  |  |      |          |          |  |  |  |     |          |          |          |  |  |      |          |          |          |          |  |      |          |          |          |          |          |      |          |          |          |          |          |     |          |          |          |          |          |     |          |          |          |          |          |  |   |   |   |  |  |      |          |  |  |  |  |     |          |          |  |  |  |     |          |          |          |  |  |
| 3 B                                                                                                                            | 1.808431                                                                                                                                                                                                                                                                                                                                                                                                                                                                                                                                                                                                                                                                                                                                                                                                                                                                                                                                                                                                                                                                                                                                                                                                                                                                                 | 3.272550 | 0.000000 |          |          |   |   |      |          |  |  |  |  |      |          |          |  |  |  |     |          |          |          |  |  |      |          |          |          |          |  |      |          |          |          |          |          |      |          |          |          |          |          |     |          |          |          |          |          |     |          |          |          |          |          |  |   |   |   |  |  |      |          |  |  |  |  |     |          |          |  |  |  |     |          |          |          |  |  |
| 4 Re                                                                                                                           | 3.288434                                                                                                                                                                                                                                                                                                                                                                                                                                                                                                                                                                                                                                                                                                                                                                                                                                                                                                                                                                                                                                                                                                                                                                                                                                                                                 | 3.455091 | 2.121100 | 0.000000 |          |   |   |      |          |  |  |  |  |      |          |          |  |  |  |     |          |          |          |  |  |      |          |          |          |          |  |      |          |          |          |          |          |      |          |          |          |          |          |     |          |          |          |          |          |     |          |          |          |          |          |  |   |   |   |  |  |      |          |  |  |  |  |     |          |          |  |  |  |     |          |          |          |  |  |
| 5 B                                                                                                                            | 1.735029                                                                                                                                                                                                                                                                                                                                                                                                                                                                                                                                                                                                                                                                                                                                                                                                                                                                                                                                                                                                                                                                                                                                                                                                                                                                                 | 2.357487 | 1.734757 | 2.360505 | 0.000000 |   |   |      |          |  |  |  |  |      |          |          |  |  |  |     |          |          |          |  |  |      |          |          |          |          |  |      |          |          |          |          |          |      |          |          |          |          |          |     |          |          |          |          |          |     |          |          |          |          |          |  |   |   |   |  |  |      |          |  |  |  |  |     |          |          |  |  |  |     |          |          |          |  |  |
| 6 Re                                                                                                                           | 2.281935                                                                                                                                                                                                                                                                                                                                                                                                                                                                                                                                                                                                                                                                                                                                                                                                                                                                                                                                                                                                                                                                                                                                                                                                                                                                                 | 2.390755 | 2.288203 | 2.439991 | 2.818991 |   |   |      |          |  |  |  |  |      |          |          |  |  |  |     |          |          |          |  |  |      |          |          |          |          |  |      |          |          |          |          |          |      |          |          |          |          |          |     |          |          |          |          |          |     |          |          |          |          |          |  |   |   |   |  |  |      |          |  |  |  |  |     |          |          |  |  |  |     |          |          |          |  |  |
| 7 B                                                                                                                            | 3.427645                                                                                                                                                                                                                                                                                                                                                                                                                                                                                                                                                                                                                                                                                                                                                                                                                                                                                                                                                                                                                                                                                                                                                                                                                                                                                 | 2.205165 | 3.409828 | 2.199214 | 2.851142 |   |   |      |          |  |  |  |  |      |          |          |  |  |  |     |          |          |          |  |  |      |          |          |          |          |  |      |          |          |          |          |          |      |          |          |          |          |          |     |          |          |          |          |          |     |          |          |          |          |          |  |   |   |   |  |  |      |          |  |  |  |  |     |          |          |  |  |  |     |          |          |          |  |  |
| 8 B                                                                                                                            | 3.017705                                                                                                                                                                                                                                                                                                                                                                                                                                                                                                                                                                                                                                                                                                                                                                                                                                                                                                                                                                                                                                                                                                                                                                                                                                                                                 | 2.214497 | 3.009892 | 2.215203 | 1.719221 |   |   |      |          |  |  |  |  |      |          |          |  |  |  |     |          |          |          |  |  |      |          |          |          |          |  |      |          |          |          |          |          |      |          |          |          |          |          |     |          |          |          |          |          |     |          |          |          |          |          |  |   |   |   |  |  |      |          |  |  |  |  |     |          |          |  |  |  |     |          |          |          |  |  |
|                                                                                                                                | 6                                                                                                                                                                                                                                                                                                                                                                                                                                                                                                                                                                                                                                                                                                                                                                                                                                                                                                                                                                                                                                                                                                                                                                                                                                                                                        | 7        | 8        |          |          |   |   |      |          |  |  |  |  |      |          |          |  |  |  |     |          |          |          |  |  |      |          |          |          |          |  |      |          |          |          |          |          |      |          |          |          |          |          |     |          |          |          |          |          |     |          |          |          |          |          |  |   |   |   |  |  |      |          |  |  |  |  |     |          |          |  |  |  |     |          |          |          |  |  |
| 6 Re                                                                                                                           | 0.000000                                                                                                                                                                                                                                                                                                                                                                                                                                                                                                                                                                                                                                                                                                                                                                                                                                                                                                                                                                                                                                                                                                                                                                                                                                                                                 |          |          |          |          |   |   |      |          |  |  |  |  |      |          |          |  |  |  |     |          |          |          |  |  |      |          |          |          |          |  |      |          |          |          |          |          |      |          |          |          |          |          |     |          |          |          |          |          |     |          |          |          |          |          |  |   |   |   |  |  |      |          |  |  |  |  |     |          |          |  |  |  |     |          |          |          |  |  |
| 7 B                                                                                                                            | 2.267013                                                                                                                                                                                                                                                                                                                                                                                                                                                                                                                                                                                                                                                                                                                                                                                                                                                                                                                                                                                                                                                                                                                                                                                                                                                                                 | 0.000000 |          |          |          |   |   |      |          |  |  |  |  |      |          |          |  |  |  |     |          |          |          |  |  |      |          |          |          |          |  |      |          |          |          |          |          |      |          |          |          |          |          |     |          |          |          |          |          |     |          |          |          |          |          |  |   |   |   |  |  |      |          |  |  |  |  |     |          |          |  |  |  |     |          |          |          |  |  |
| 8 B                                                                                                                            | 3.067920                                                                                                                                                                                                                                                                                                                                                                                                                                                                                                                                                                                                                                                                                                                                                                                                                                                                                                                                                                                                                                                                                                                                                                                                                                                                                 | 1.720527 | 0.000000 |          |          |   |   |      |          |  |  |  |  |      |          |          |  |  |  |     |          |          |          |  |  |      |          |          |          |          |  |      |          |          |          |          |          |      |          |          |          |          |          |     |          |          |          |          |          |     |          |          |          |          |          |  |   |   |   |  |  |      |          |  |  |  |  |     |          |          |  |  |  |     |          |          |          |  |  |
|  <p>6. -942.8936888 +24.6 C<sub>1</sub></p> | <table border="1"> <thead> <tr> <th></th> <th>1</th> <th>2</th> <th>3</th> <th>4</th> <th>5</th> </tr> </thead> <tbody> <tr><td>1 Re</td><td>0.000000</td><td></td><td></td><td></td><td></td></tr> <tr><td>2 B</td><td>2.129627</td><td>0.000000</td><td></td><td></td><td></td></tr> <tr><td>3 B</td><td>2.461847</td><td>1.816479</td><td>0.000000</td><td></td><td></td></tr> <tr><td>4 Re</td><td>2.461893</td><td>3.434411</td><td>2.296994</td><td>0.000000</td><td></td></tr> <tr><td>5 B</td><td>3.498127</td><td>3.795982</td><td>3.142520</td><td>2.080246</td><td>0.000000</td></tr> <tr><td>6 Re</td><td>2.460926</td><td>2.281302</td><td>2.778734</td><td>2.883727</td><td>2.120385</td></tr> <tr><td>7 B</td><td>3.276441</td><td>1.664403</td><td>1.726268</td><td>3.414519</td><td>3.159012</td></tr> <tr><td>8 B</td><td>3.355900</td><td>2.801716</td><td>1.786195</td><td>2.252248</td><td>1.804571</td></tr> <tr> <td></td> <td>6</td> <td>7</td> <td>8</td> <td></td> <td></td> </tr> <tr><td>6 Re</td><td>0.000000</td><td></td><td></td><td></td><td></td></tr> <tr><td>7 B</td><td>2.264353</td><td>0.000000</td><td></td><td></td><td></td></tr> <tr><td>8 B</td><td>2.284824</td><td>1.716581</td><td>0.000000</td><td></td><td></td></tr> </tbody> </table> |          | 1        | 2        | 3        | 4 | 5 | 1 Re | 0.000000 |  |  |  |  | 2 B  | 2.129627 | 0.000000 |  |  |  | 3 B | 2.461847 | 1.816479 | 0.000000 |  |  | 4 Re | 2.461893 | 3.434411 | 2.296994 | 0.000000 |  | 5 B  | 3.498127 | 3.795982 | 3.142520 | 2.080246 | 0.000000 | 6 Re | 2.460926 | 2.281302 | 2.778734 | 2.883727 | 2.120385 | 7 B | 3.276441 | 1.664403 | 1.726268 | 3.414519 | 3.159012 | 8 B | 3.355900 | 2.801716 | 1.786195 | 2.252248 | 1.804571 |  | 6 | 7 | 8 |  |  | 6 Re | 0.000000 |  |  |  |  | 7 B | 2.264353 | 0.000000 |  |  |  | 8 B | 2.284824 | 1.716581 | 0.000000 |  |  |
|                                                                                                                                | 1                                                                                                                                                                                                                                                                                                                                                                                                                                                                                                                                                                                                                                                                                                                                                                                                                                                                                                                                                                                                                                                                                                                                                                                                                                                                                        | 2        | 3        | 4        | 5        |   |   |      |          |  |  |  |  |      |          |          |  |  |  |     |          |          |          |  |  |      |          |          |          |          |  |      |          |          |          |          |          |      |          |          |          |          |          |     |          |          |          |          |          |     |          |          |          |          |          |  |   |   |   |  |  |      |          |  |  |  |  |     |          |          |  |  |  |     |          |          |          |  |  |
| 1 Re                                                                                                                           | 0.000000                                                                                                                                                                                                                                                                                                                                                                                                                                                                                                                                                                                                                                                                                                                                                                                                                                                                                                                                                                                                                                                                                                                                                                                                                                                                                 |          |          |          |          |   |   |      |          |  |  |  |  |      |          |          |  |  |  |     |          |          |          |  |  |      |          |          |          |          |  |      |          |          |          |          |          |      |          |          |          |          |          |     |          |          |          |          |          |     |          |          |          |          |          |  |   |   |   |  |  |      |          |  |  |  |  |     |          |          |  |  |  |     |          |          |          |  |  |
| 2 B                                                                                                                            | 2.129627                                                                                                                                                                                                                                                                                                                                                                                                                                                                                                                                                                                                                                                                                                                                                                                                                                                                                                                                                                                                                                                                                                                                                                                                                                                                                 | 0.000000 |          |          |          |   |   |      |          |  |  |  |  |      |          |          |  |  |  |     |          |          |          |  |  |      |          |          |          |          |  |      |          |          |          |          |          |      |          |          |          |          |          |     |          |          |          |          |          |     |          |          |          |          |          |  |   |   |   |  |  |      |          |  |  |  |  |     |          |          |  |  |  |     |          |          |          |  |  |
| 3 B                                                                                                                            | 2.461847                                                                                                                                                                                                                                                                                                                                                                                                                                                                                                                                                                                                                                                                                                                                                                                                                                                                                                                                                                                                                                                                                                                                                                                                                                                                                 | 1.816479 | 0.000000 |          |          |   |   |      |          |  |  |  |  |      |          |          |  |  |  |     |          |          |          |  |  |      |          |          |          |          |  |      |          |          |          |          |          |      |          |          |          |          |          |     |          |          |          |          |          |     |          |          |          |          |          |  |   |   |   |  |  |      |          |  |  |  |  |     |          |          |  |  |  |     |          |          |          |  |  |
| 4 Re                                                                                                                           | 2.461893                                                                                                                                                                                                                                                                                                                                                                                                                                                                                                                                                                                                                                                                                                                                                                                                                                                                                                                                                                                                                                                                                                                                                                                                                                                                                 | 3.434411 | 2.296994 | 0.000000 |          |   |   |      |          |  |  |  |  |      |          |          |  |  |  |     |          |          |          |  |  |      |          |          |          |          |  |      |          |          |          |          |          |      |          |          |          |          |          |     |          |          |          |          |          |     |          |          |          |          |          |  |   |   |   |  |  |      |          |  |  |  |  |     |          |          |  |  |  |     |          |          |          |  |  |
| 5 B                                                                                                                            | 3.498127                                                                                                                                                                                                                                                                                                                                                                                                                                                                                                                                                                                                                                                                                                                                                                                                                                                                                                                                                                                                                                                                                                                                                                                                                                                                                 | 3.795982 | 3.142520 | 2.080246 | 0.000000 |   |   |      |          |  |  |  |  |      |          |          |  |  |  |     |          |          |          |  |  |      |          |          |          |          |  |      |          |          |          |          |          |      |          |          |          |          |          |     |          |          |          |          |          |     |          |          |          |          |          |  |   |   |   |  |  |      |          |  |  |  |  |     |          |          |  |  |  |     |          |          |          |  |  |
| 6 Re                                                                                                                           | 2.460926                                                                                                                                                                                                                                                                                                                                                                                                                                                                                                                                                                                                                                                                                                                                                                                                                                                                                                                                                                                                                                                                                                                                                                                                                                                                                 | 2.281302 | 2.778734 | 2.883727 | 2.120385 |   |   |      |          |  |  |  |  |      |          |          |  |  |  |     |          |          |          |  |  |      |          |          |          |          |  |      |          |          |          |          |          |      |          |          |          |          |          |     |          |          |          |          |          |     |          |          |          |          |          |  |   |   |   |  |  |      |          |  |  |  |  |     |          |          |  |  |  |     |          |          |          |  |  |
| 7 B                                                                                                                            | 3.276441                                                                                                                                                                                                                                                                                                                                                                                                                                                                                                                                                                                                                                                                                                                                                                                                                                                                                                                                                                                                                                                                                                                                                                                                                                                                                 | 1.664403 | 1.726268 | 3.414519 | 3.159012 |   |   |      |          |  |  |  |  |      |          |          |  |  |  |     |          |          |          |  |  |      |          |          |          |          |  |      |          |          |          |          |          |      |          |          |          |          |          |     |          |          |          |          |          |     |          |          |          |          |          |  |   |   |   |  |  |      |          |  |  |  |  |     |          |          |  |  |  |     |          |          |          |  |  |
| 8 B                                                                                                                            | 3.355900                                                                                                                                                                                                                                                                                                                                                                                                                                                                                                                                                                                                                                                                                                                                                                                                                                                                                                                                                                                                                                                                                                                                                                                                                                                                                 | 2.801716 | 1.786195 | 2.252248 | 1.804571 |   |   |      |          |  |  |  |  |      |          |          |  |  |  |     |          |          |          |  |  |      |          |          |          |          |  |      |          |          |          |          |          |      |          |          |          |          |          |     |          |          |          |          |          |     |          |          |          |          |          |  |   |   |   |  |  |      |          |  |  |  |  |     |          |          |  |  |  |     |          |          |          |  |  |
|                                                                                                                                | 6                                                                                                                                                                                                                                                                                                                                                                                                                                                                                                                                                                                                                                                                                                                                                                                                                                                                                                                                                                                                                                                                                                                                                                                                                                                                                        | 7        | 8        |          |          |   |   |      |          |  |  |  |  |      |          |          |  |  |  |     |          |          |          |  |  |      |          |          |          |          |  |      |          |          |          |          |          |      |          |          |          |          |          |     |          |          |          |          |          |     |          |          |          |          |          |  |   |   |   |  |  |      |          |  |  |  |  |     |          |          |  |  |  |     |          |          |          |  |  |
| 6 Re                                                                                                                           | 0.000000                                                                                                                                                                                                                                                                                                                                                                                                                                                                                                                                                                                                                                                                                                                                                                                                                                                                                                                                                                                                                                                                                                                                                                                                                                                                                 |          |          |          |          |   |   |      |          |  |  |  |  |      |          |          |  |  |  |     |          |          |          |  |  |      |          |          |          |          |  |      |          |          |          |          |          |      |          |          |          |          |          |     |          |          |          |          |          |     |          |          |          |          |          |  |   |   |   |  |  |      |          |  |  |  |  |     |          |          |  |  |  |     |          |          |          |  |  |
| 7 B                                                                                                                            | 2.264353                                                                                                                                                                                                                                                                                                                                                                                                                                                                                                                                                                                                                                                                                                                                                                                                                                                                                                                                                                                                                                                                                                                                                                                                                                                                                 | 0.000000 |          |          |          |   |   |      |          |  |  |  |  |      |          |          |  |  |  |     |          |          |          |  |  |      |          |          |          |          |  |      |          |          |          |          |          |      |          |          |          |          |          |     |          |          |          |          |          |     |          |          |          |          |          |  |   |   |   |  |  |      |          |  |  |  |  |     |          |          |  |  |  |     |          |          |          |  |  |
| 8 B                                                                                                                            | 2.284824                                                                                                                                                                                                                                                                                                                                                                                                                                                                                                                                                                                                                                                                                                                                                                                                                                                                                                                                                                                                                                                                                                                                                                                                                                                                                 | 1.716581 | 0.000000 |          |          |   |   |      |          |  |  |  |  |      |          |          |  |  |  |     |          |          |          |  |  |      |          |          |          |          |  |      |          |          |          |          |          |      |          |          |          |          |          |     |          |          |          |          |          |     |          |          |          |          |          |  |   |   |   |  |  |      |          |  |  |  |  |     |          |          |  |  |  |     |          |          |          |  |  |

| 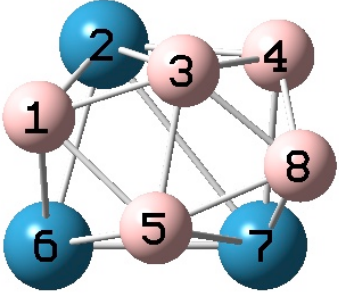 <p>7. -942.8891070 +27.4 C<sub>1</sub></p>   | <table border="1"> <thead> <tr> <th></th> <th>1</th> <th>2</th> <th>3</th> <th>4</th> <th>5</th> </tr> </thead> <tbody> <tr><td>1 B</td><td>0.000000</td><td></td><td></td><td></td><td></td></tr> <tr><td>2 Re</td><td>2.129356</td><td>0.000000</td><td></td><td></td><td></td></tr> <tr><td>3 B</td><td>1.759035</td><td>2.351836</td><td>0.000000</td><td></td><td></td></tr> <tr><td>4 B</td><td>3.022860</td><td>2.110262</td><td>1.809151</td><td>0.000000</td><td></td></tr> <tr><td>5 B</td><td>1.855959</td><td>3.011013</td><td>1.822570</td><td>2.773235</td><td>0.000000</td></tr> <tr><td>6 Re</td><td>2.180029</td><td>2.392360</td><td>3.179633</td><td>3.434085</td><td>2.243398</td></tr> <tr><td>7 Re</td><td>3.409481</td><td>2.916940</td><td>3.006224</td><td>2.255639</td><td>2.346763</td></tr> <tr><td>8 B</td><td>3.025344</td><td>3.260118</td><td>1.725618</td><td>1.770188</td><td>1.795387</td></tr> <tr> <td></td> <td>6</td> <td>7</td> <td>8</td> <td></td> <td></td> </tr> <tr><td>6 Re</td><td>0.000000</td><td></td><td></td><td></td><td></td></tr> <tr><td>7 Re</td><td>2.441396</td><td>0.000000</td><td></td><td></td><td></td></tr> <tr><td>8 B</td><td>3.464823</td><td>2.103709</td><td>0.000000</td><td></td><td></td></tr> </tbody> </table>                                              |          | 1        | 2        | 3        | 4 | 5 | 1 B  | 0.000000 |  |  |  |  | 2 Re | 2.129356 | 0.000000 |  |  |  | 3 B  | 1.759035 | 2.351836 | 0.000000 |  |  | 4 B | 3.022860 | 2.110262 | 1.809151 | 0.000000 |  | 5 B | 1.855959 | 3.011013 | 1.822570 | 2.773235 | 0.000000 | 6 Re | 2.180029 | 2.392360 | 3.179633 | 3.434085 | 2.243398 | 7 Re | 3.409481 | 2.916940 | 3.006224 | 2.255639 | 2.346763 | 8 B  | 3.025344 | 3.260118 | 1.725618 | 1.770188 | 1.795387 |  | 6 | 7 | 8 |  |  | 6 Re | 0.000000 |  |  |  |  | 7 Re | 2.441396 | 0.000000 |  |  |  | 8 B  | 3.464823 | 2.103709 | 0.000000 |  |  |
|--------------------------------------------------------------------------------------------------------------------------------|----------------------------------------------------------------------------------------------------------------------------------------------------------------------------------------------------------------------------------------------------------------------------------------------------------------------------------------------------------------------------------------------------------------------------------------------------------------------------------------------------------------------------------------------------------------------------------------------------------------------------------------------------------------------------------------------------------------------------------------------------------------------------------------------------------------------------------------------------------------------------------------------------------------------------------------------------------------------------------------------------------------------------------------------------------------------------------------------------------------------------------------------------------------------------------------------------------------------------------------------------------------------------------------------------------------------------------------|----------|----------|----------|----------|---|---|------|----------|--|--|--|--|------|----------|----------|--|--|--|------|----------|----------|----------|--|--|-----|----------|----------|----------|----------|--|-----|----------|----------|----------|----------|----------|------|----------|----------|----------|----------|----------|------|----------|----------|----------|----------|----------|------|----------|----------|----------|----------|----------|--|---|---|---|--|--|------|----------|--|--|--|--|------|----------|----------|--|--|--|------|----------|----------|----------|--|--|
|                                                                                                                                | 1                                                                                                                                                                                                                                                                                                                                                                                                                                                                                                                                                                                                                                                                                                                                                                                                                                                                                                                                                                                                                                                                                                                                                                                                                                                                                                                                      | 2        | 3        | 4        | 5        |   |   |      |          |  |  |  |  |      |          |          |  |  |  |      |          |          |          |  |  |     |          |          |          |          |  |     |          |          |          |          |          |      |          |          |          |          |          |      |          |          |          |          |          |      |          |          |          |          |          |  |   |   |   |  |  |      |          |  |  |  |  |      |          |          |  |  |  |      |          |          |          |  |  |
| 1 B                                                                                                                            | 0.000000                                                                                                                                                                                                                                                                                                                                                                                                                                                                                                                                                                                                                                                                                                                                                                                                                                                                                                                                                                                                                                                                                                                                                                                                                                                                                                                               |          |          |          |          |   |   |      |          |  |  |  |  |      |          |          |  |  |  |      |          |          |          |  |  |     |          |          |          |          |  |     |          |          |          |          |          |      |          |          |          |          |          |      |          |          |          |          |          |      |          |          |          |          |          |  |   |   |   |  |  |      |          |  |  |  |  |      |          |          |  |  |  |      |          |          |          |  |  |
| 2 Re                                                                                                                           | 2.129356                                                                                                                                                                                                                                                                                                                                                                                                                                                                                                                                                                                                                                                                                                                                                                                                                                                                                                                                                                                                                                                                                                                                                                                                                                                                                                                               | 0.000000 |          |          |          |   |   |      |          |  |  |  |  |      |          |          |  |  |  |      |          |          |          |  |  |     |          |          |          |          |  |     |          |          |          |          |          |      |          |          |          |          |          |      |          |          |          |          |          |      |          |          |          |          |          |  |   |   |   |  |  |      |          |  |  |  |  |      |          |          |  |  |  |      |          |          |          |  |  |
| 3 B                                                                                                                            | 1.759035                                                                                                                                                                                                                                                                                                                                                                                                                                                                                                                                                                                                                                                                                                                                                                                                                                                                                                                                                                                                                                                                                                                                                                                                                                                                                                                               | 2.351836 | 0.000000 |          |          |   |   |      |          |  |  |  |  |      |          |          |  |  |  |      |          |          |          |  |  |     |          |          |          |          |  |     |          |          |          |          |          |      |          |          |          |          |          |      |          |          |          |          |          |      |          |          |          |          |          |  |   |   |   |  |  |      |          |  |  |  |  |      |          |          |  |  |  |      |          |          |          |  |  |
| 4 B                                                                                                                            | 3.022860                                                                                                                                                                                                                                                                                                                                                                                                                                                                                                                                                                                                                                                                                                                                                                                                                                                                                                                                                                                                                                                                                                                                                                                                                                                                                                                               | 2.110262 | 1.809151 | 0.000000 |          |   |   |      |          |  |  |  |  |      |          |          |  |  |  |      |          |          |          |  |  |     |          |          |          |          |  |     |          |          |          |          |          |      |          |          |          |          |          |      |          |          |          |          |          |      |          |          |          |          |          |  |   |   |   |  |  |      |          |  |  |  |  |      |          |          |  |  |  |      |          |          |          |  |  |
| 5 B                                                                                                                            | 1.855959                                                                                                                                                                                                                                                                                                                                                                                                                                                                                                                                                                                                                                                                                                                                                                                                                                                                                                                                                                                                                                                                                                                                                                                                                                                                                                                               | 3.011013 | 1.822570 | 2.773235 | 0.000000 |   |   |      |          |  |  |  |  |      |          |          |  |  |  |      |          |          |          |  |  |     |          |          |          |          |  |     |          |          |          |          |          |      |          |          |          |          |          |      |          |          |          |          |          |      |          |          |          |          |          |  |   |   |   |  |  |      |          |  |  |  |  |      |          |          |  |  |  |      |          |          |          |  |  |
| 6 Re                                                                                                                           | 2.180029                                                                                                                                                                                                                                                                                                                                                                                                                                                                                                                                                                                                                                                                                                                                                                                                                                                                                                                                                                                                                                                                                                                                                                                                                                                                                                                               | 2.392360 | 3.179633 | 3.434085 | 2.243398 |   |   |      |          |  |  |  |  |      |          |          |  |  |  |      |          |          |          |  |  |     |          |          |          |          |  |     |          |          |          |          |          |      |          |          |          |          |          |      |          |          |          |          |          |      |          |          |          |          |          |  |   |   |   |  |  |      |          |  |  |  |  |      |          |          |  |  |  |      |          |          |          |  |  |
| 7 Re                                                                                                                           | 3.409481                                                                                                                                                                                                                                                                                                                                                                                                                                                                                                                                                                                                                                                                                                                                                                                                                                                                                                                                                                                                                                                                                                                                                                                                                                                                                                                               | 2.916940 | 3.006224 | 2.255639 | 2.346763 |   |   |      |          |  |  |  |  |      |          |          |  |  |  |      |          |          |          |  |  |     |          |          |          |          |  |     |          |          |          |          |          |      |          |          |          |          |          |      |          |          |          |          |          |      |          |          |          |          |          |  |   |   |   |  |  |      |          |  |  |  |  |      |          |          |  |  |  |      |          |          |          |  |  |
| 8 B                                                                                                                            | 3.025344                                                                                                                                                                                                                                                                                                                                                                                                                                                                                                                                                                                                                                                                                                                                                                                                                                                                                                                                                                                                                                                                                                                                                                                                                                                                                                                               | 3.260118 | 1.725618 | 1.770188 | 1.795387 |   |   |      |          |  |  |  |  |      |          |          |  |  |  |      |          |          |          |  |  |     |          |          |          |          |  |     |          |          |          |          |          |      |          |          |          |          |          |      |          |          |          |          |          |      |          |          |          |          |          |  |   |   |   |  |  |      |          |  |  |  |  |      |          |          |  |  |  |      |          |          |          |  |  |
|                                                                                                                                | 6                                                                                                                                                                                                                                                                                                                                                                                                                                                                                                                                                                                                                                                                                                                                                                                                                                                                                                                                                                                                                                                                                                                                                                                                                                                                                                                                      | 7        | 8        |          |          |   |   |      |          |  |  |  |  |      |          |          |  |  |  |      |          |          |          |  |  |     |          |          |          |          |  |     |          |          |          |          |          |      |          |          |          |          |          |      |          |          |          |          |          |      |          |          |          |          |          |  |   |   |   |  |  |      |          |  |  |  |  |      |          |          |  |  |  |      |          |          |          |  |  |
| 6 Re                                                                                                                           | 0.000000                                                                                                                                                                                                                                                                                                                                                                                                                                                                                                                                                                                                                                                                                                                                                                                                                                                                                                                                                                                                                                                                                                                                                                                                                                                                                                                               |          |          |          |          |   |   |      |          |  |  |  |  |      |          |          |  |  |  |      |          |          |          |  |  |     |          |          |          |          |  |     |          |          |          |          |          |      |          |          |          |          |          |      |          |          |          |          |          |      |          |          |          |          |          |  |   |   |   |  |  |      |          |  |  |  |  |      |          |          |  |  |  |      |          |          |          |  |  |
| 7 Re                                                                                                                           | 2.441396                                                                                                                                                                                                                                                                                                                                                                                                                                                                                                                                                                                                                                                                                                                                                                                                                                                                                                                                                                                                                                                                                                                                                                                                                                                                                                                               | 0.000000 |          |          |          |   |   |      |          |  |  |  |  |      |          |          |  |  |  |      |          |          |          |  |  |     |          |          |          |          |  |     |          |          |          |          |          |      |          |          |          |          |          |      |          |          |          |          |          |      |          |          |          |          |          |  |   |   |   |  |  |      |          |  |  |  |  |      |          |          |  |  |  |      |          |          |          |  |  |
| 8 B                                                                                                                            | 3.464823                                                                                                                                                                                                                                                                                                                                                                                                                                                                                                                                                                                                                                                                                                                                                                                                                                                                                                                                                                                                                                                                                                                                                                                                                                                                                                                               | 2.103709 | 0.000000 |          |          |   |   |      |          |  |  |  |  |      |          |          |  |  |  |      |          |          |          |  |  |     |          |          |          |          |  |     |          |          |          |          |          |      |          |          |          |          |          |      |          |          |          |          |          |      |          |          |          |          |          |  |   |   |   |  |  |      |          |  |  |  |  |      |          |          |  |  |  |      |          |          |          |  |  |
|  <p>8. -942.8880158 +28.1 C<sub>1</sub></p>   | <table border="1"> <thead> <tr> <th></th> <th>1</th> <th>2</th> <th>3</th> <th>4</th> <th>5</th> </tr> </thead> <tbody> <tr><td>1 Re</td><td>0.000000</td><td></td><td></td><td></td><td></td></tr> <tr><td>2 B</td><td>3.319256</td><td>0.000000</td><td></td><td></td><td></td></tr> <tr><td>3 B</td><td>3.021229</td><td>2.104833</td><td>0.000000</td><td></td><td></td></tr> <tr><td>4 B</td><td>2.280544</td><td>3.343831</td><td>1.796365</td><td>0.000000</td><td></td></tr> <tr><td>5 B</td><td>2.116004</td><td>1.678575</td><td>1.718221</td><td>2.516731</td><td>0.000000</td></tr> <tr><td>6 Re</td><td>2.480297</td><td>2.192334</td><td>2.293374</td><td>2.169178</td><td>2.413437</td></tr> <tr><td>7 B</td><td>2.216405</td><td>3.166357</td><td>1.730886</td><td>1.704149</td><td>1.727573</td></tr> <tr><td>8 Re</td><td>2.619123</td><td>2.186371</td><td>3.584558</td><td>4.055498</td><td>2.105914</td></tr> <tr> <td></td> <td>6</td> <td>7</td> <td>8</td> <td></td> <td></td> </tr> <tr><td>6 Re</td><td>0.000000</td><td></td><td></td><td></td><td></td></tr> <tr><td>7 B</td><td>3.078083</td><td>0.000000</td><td></td><td></td><td></td></tr> <tr><td>8 Re</td><td>2.879557</td><td>3.660290</td><td>0.000000</td><td></td><td></td></tr> </tbody> </table> <p>Re8-H 1.6738</p>                          |          | 1        | 2        | 3        | 4 | 5 | 1 Re | 0.000000 |  |  |  |  | 2 B  | 3.319256 | 0.000000 |  |  |  | 3 B  | 3.021229 | 2.104833 | 0.000000 |  |  | 4 B | 2.280544 | 3.343831 | 1.796365 | 0.000000 |  | 5 B | 2.116004 | 1.678575 | 1.718221 | 2.516731 | 0.000000 | 6 Re | 2.480297 | 2.192334 | 2.293374 | 2.169178 | 2.413437 | 7 B  | 2.216405 | 3.166357 | 1.730886 | 1.704149 | 1.727573 | 8 Re | 2.619123 | 2.186371 | 3.584558 | 4.055498 | 2.105914 |  | 6 | 7 | 8 |  |  | 6 Re | 0.000000 |  |  |  |  | 7 B  | 3.078083 | 0.000000 |  |  |  | 8 Re | 2.879557 | 3.660290 | 0.000000 |  |  |
|                                                                                                                                | 1                                                                                                                                                                                                                                                                                                                                                                                                                                                                                                                                                                                                                                                                                                                                                                                                                                                                                                                                                                                                                                                                                                                                                                                                                                                                                                                                      | 2        | 3        | 4        | 5        |   |   |      |          |  |  |  |  |      |          |          |  |  |  |      |          |          |          |  |  |     |          |          |          |          |  |     |          |          |          |          |          |      |          |          |          |          |          |      |          |          |          |          |          |      |          |          |          |          |          |  |   |   |   |  |  |      |          |  |  |  |  |      |          |          |  |  |  |      |          |          |          |  |  |
| 1 Re                                                                                                                           | 0.000000                                                                                                                                                                                                                                                                                                                                                                                                                                                                                                                                                                                                                                                                                                                                                                                                                                                                                                                                                                                                                                                                                                                                                                                                                                                                                                                               |          |          |          |          |   |   |      |          |  |  |  |  |      |          |          |  |  |  |      |          |          |          |  |  |     |          |          |          |          |  |     |          |          |          |          |          |      |          |          |          |          |          |      |          |          |          |          |          |      |          |          |          |          |          |  |   |   |   |  |  |      |          |  |  |  |  |      |          |          |  |  |  |      |          |          |          |  |  |
| 2 B                                                                                                                            | 3.319256                                                                                                                                                                                                                                                                                                                                                                                                                                                                                                                                                                                                                                                                                                                                                                                                                                                                                                                                                                                                                                                                                                                                                                                                                                                                                                                               | 0.000000 |          |          |          |   |   |      |          |  |  |  |  |      |          |          |  |  |  |      |          |          |          |  |  |     |          |          |          |          |  |     |          |          |          |          |          |      |          |          |          |          |          |      |          |          |          |          |          |      |          |          |          |          |          |  |   |   |   |  |  |      |          |  |  |  |  |      |          |          |  |  |  |      |          |          |          |  |  |
| 3 B                                                                                                                            | 3.021229                                                                                                                                                                                                                                                                                                                                                                                                                                                                                                                                                                                                                                                                                                                                                                                                                                                                                                                                                                                                                                                                                                                                                                                                                                                                                                                               | 2.104833 | 0.000000 |          |          |   |   |      |          |  |  |  |  |      |          |          |  |  |  |      |          |          |          |  |  |     |          |          |          |          |  |     |          |          |          |          |          |      |          |          |          |          |          |      |          |          |          |          |          |      |          |          |          |          |          |  |   |   |   |  |  |      |          |  |  |  |  |      |          |          |  |  |  |      |          |          |          |  |  |
| 4 B                                                                                                                            | 2.280544                                                                                                                                                                                                                                                                                                                                                                                                                                                                                                                                                                                                                                                                                                                                                                                                                                                                                                                                                                                                                                                                                                                                                                                                                                                                                                                               | 3.343831 | 1.796365 | 0.000000 |          |   |   |      |          |  |  |  |  |      |          |          |  |  |  |      |          |          |          |  |  |     |          |          |          |          |  |     |          |          |          |          |          |      |          |          |          |          |          |      |          |          |          |          |          |      |          |          |          |          |          |  |   |   |   |  |  |      |          |  |  |  |  |      |          |          |  |  |  |      |          |          |          |  |  |
| 5 B                                                                                                                            | 2.116004                                                                                                                                                                                                                                                                                                                                                                                                                                                                                                                                                                                                                                                                                                                                                                                                                                                                                                                                                                                                                                                                                                                                                                                                                                                                                                                               | 1.678575 | 1.718221 | 2.516731 | 0.000000 |   |   |      |          |  |  |  |  |      |          |          |  |  |  |      |          |          |          |  |  |     |          |          |          |          |  |     |          |          |          |          |          |      |          |          |          |          |          |      |          |          |          |          |          |      |          |          |          |          |          |  |   |   |   |  |  |      |          |  |  |  |  |      |          |          |  |  |  |      |          |          |          |  |  |
| 6 Re                                                                                                                           | 2.480297                                                                                                                                                                                                                                                                                                                                                                                                                                                                                                                                                                                                                                                                                                                                                                                                                                                                                                                                                                                                                                                                                                                                                                                                                                                                                                                               | 2.192334 | 2.293374 | 2.169178 | 2.413437 |   |   |      |          |  |  |  |  |      |          |          |  |  |  |      |          |          |          |  |  |     |          |          |          |          |  |     |          |          |          |          |          |      |          |          |          |          |          |      |          |          |          |          |          |      |          |          |          |          |          |  |   |   |   |  |  |      |          |  |  |  |  |      |          |          |  |  |  |      |          |          |          |  |  |
| 7 B                                                                                                                            | 2.216405                                                                                                                                                                                                                                                                                                                                                                                                                                                                                                                                                                                                                                                                                                                                                                                                                                                                                                                                                                                                                                                                                                                                                                                                                                                                                                                               | 3.166357 | 1.730886 | 1.704149 | 1.727573 |   |   |      |          |  |  |  |  |      |          |          |  |  |  |      |          |          |          |  |  |     |          |          |          |          |  |     |          |          |          |          |          |      |          |          |          |          |          |      |          |          |          |          |          |      |          |          |          |          |          |  |   |   |   |  |  |      |          |  |  |  |  |      |          |          |  |  |  |      |          |          |          |  |  |
| 8 Re                                                                                                                           | 2.619123                                                                                                                                                                                                                                                                                                                                                                                                                                                                                                                                                                                                                                                                                                                                                                                                                                                                                                                                                                                                                                                                                                                                                                                                                                                                                                                               | 2.186371 | 3.584558 | 4.055498 | 2.105914 |   |   |      |          |  |  |  |  |      |          |          |  |  |  |      |          |          |          |  |  |     |          |          |          |          |  |     |          |          |          |          |          |      |          |          |          |          |          |      |          |          |          |          |          |      |          |          |          |          |          |  |   |   |   |  |  |      |          |  |  |  |  |      |          |          |  |  |  |      |          |          |          |  |  |
|                                                                                                                                | 6                                                                                                                                                                                                                                                                                                                                                                                                                                                                                                                                                                                                                                                                                                                                                                                                                                                                                                                                                                                                                                                                                                                                                                                                                                                                                                                                      | 7        | 8        |          |          |   |   |      |          |  |  |  |  |      |          |          |  |  |  |      |          |          |          |  |  |     |          |          |          |          |  |     |          |          |          |          |          |      |          |          |          |          |          |      |          |          |          |          |          |      |          |          |          |          |          |  |   |   |   |  |  |      |          |  |  |  |  |      |          |          |  |  |  |      |          |          |          |  |  |
| 6 Re                                                                                                                           | 0.000000                                                                                                                                                                                                                                                                                                                                                                                                                                                                                                                                                                                                                                                                                                                                                                                                                                                                                                                                                                                                                                                                                                                                                                                                                                                                                                                               |          |          |          |          |   |   |      |          |  |  |  |  |      |          |          |  |  |  |      |          |          |          |  |  |     |          |          |          |          |  |     |          |          |          |          |          |      |          |          |          |          |          |      |          |          |          |          |          |      |          |          |          |          |          |  |   |   |   |  |  |      |          |  |  |  |  |      |          |          |  |  |  |      |          |          |          |  |  |
| 7 B                                                                                                                            | 3.078083                                                                                                                                                                                                                                                                                                                                                                                                                                                                                                                                                                                                                                                                                                                                                                                                                                                                                                                                                                                                                                                                                                                                                                                                                                                                                                                               | 0.000000 |          |          |          |   |   |      |          |  |  |  |  |      |          |          |  |  |  |      |          |          |          |  |  |     |          |          |          |          |  |     |          |          |          |          |          |      |          |          |          |          |          |      |          |          |          |          |          |      |          |          |          |          |          |  |   |   |   |  |  |      |          |  |  |  |  |      |          |          |  |  |  |      |          |          |          |  |  |
| 8 Re                                                                                                                           | 2.879557                                                                                                                                                                                                                                                                                                                                                                                                                                                                                                                                                                                                                                                                                                                                                                                                                                                                                                                                                                                                                                                                                                                                                                                                                                                                                                                               | 3.660290 | 0.000000 |          |          |   |   |      |          |  |  |  |  |      |          |          |  |  |  |      |          |          |          |  |  |     |          |          |          |          |  |     |          |          |          |          |          |      |          |          |          |          |          |      |          |          |          |          |          |      |          |          |          |          |          |  |   |   |   |  |  |      |          |  |  |  |  |      |          |          |  |  |  |      |          |          |          |  |  |
|  <p>9. -942.8843756 +30.4 C<sub>1</sub></p> | <table border="1"> <thead> <tr> <th></th> <th>1</th> <th>2</th> <th>3</th> <th>4</th> <th>5</th> </tr> </thead> <tbody> <tr><td>1 Re</td><td>0.000000</td><td></td><td></td><td></td><td></td></tr> <tr><td>2 B</td><td>3.268083</td><td>0.000000</td><td></td><td></td><td></td></tr> <tr><td>3 Re</td><td>2.433833</td><td>3.426616</td><td>0.000000</td><td></td><td></td></tr> <tr><td>4 B</td><td>2.352371</td><td>1.662026</td><td>2.337812</td><td>0.000000</td><td></td></tr> <tr><td>5 B</td><td>2.149644</td><td>1.699430</td><td>3.512886</td><td>1.825102</td><td>0.000000</td></tr> <tr><td>6 Re</td><td>2.504895</td><td>2.257579</td><td>2.831078</td><td>2.674571</td><td>2.263017</td></tr> <tr><td>7 B</td><td>2.250469</td><td>3.386060</td><td>2.099102</td><td>1.731216</td><td>3.018199</td></tr> <tr><td>8 B</td><td>3.286728</td><td>1.763193</td><td>2.179060</td><td>1.773168</td><td>2.859248</td></tr> <tr> <td></td> <td>6</td> <td>7</td> <td>8</td> <td></td> <td></td> </tr> <tr><td>6 Re</td><td>0.000000</td><td></td><td></td><td></td><td></td></tr> <tr><td>7 B</td><td>3.772801</td><td>0.000000</td><td></td><td></td><td></td></tr> <tr><td>8 B</td><td>2.212488</td><td>3.010857</td><td>0.000000</td><td></td><td></td></tr> </tbody> </table> <p>Bridge B4-H-B7 B4-H 1.2567 B7-H 1.4831</p> |          | 1        | 2        | 3        | 4 | 5 | 1 Re | 0.000000 |  |  |  |  | 2 B  | 3.268083 | 0.000000 |  |  |  | 3 Re | 2.433833 | 3.426616 | 0.000000 |  |  | 4 B | 2.352371 | 1.662026 | 2.337812 | 0.000000 |  | 5 B | 2.149644 | 1.699430 | 3.512886 | 1.825102 | 0.000000 | 6 Re | 2.504895 | 2.257579 | 2.831078 | 2.674571 | 2.263017 | 7 B  | 2.250469 | 3.386060 | 2.099102 | 1.731216 | 3.018199 | 8 B  | 3.286728 | 1.763193 | 2.179060 | 1.773168 | 2.859248 |  | 6 | 7 | 8 |  |  | 6 Re | 0.000000 |  |  |  |  | 7 B  | 3.772801 | 0.000000 |  |  |  | 8 B  | 2.212488 | 3.010857 | 0.000000 |  |  |
|                                                                                                                                | 1                                                                                                                                                                                                                                                                                                                                                                                                                                                                                                                                                                                                                                                                                                                                                                                                                                                                                                                                                                                                                                                                                                                                                                                                                                                                                                                                      | 2        | 3        | 4        | 5        |   |   |      |          |  |  |  |  |      |          |          |  |  |  |      |          |          |          |  |  |     |          |          |          |          |  |     |          |          |          |          |          |      |          |          |          |          |          |      |          |          |          |          |          |      |          |          |          |          |          |  |   |   |   |  |  |      |          |  |  |  |  |      |          |          |  |  |  |      |          |          |          |  |  |
| 1 Re                                                                                                                           | 0.000000                                                                                                                                                                                                                                                                                                                                                                                                                                                                                                                                                                                                                                                                                                                                                                                                                                                                                                                                                                                                                                                                                                                                                                                                                                                                                                                               |          |          |          |          |   |   |      |          |  |  |  |  |      |          |          |  |  |  |      |          |          |          |  |  |     |          |          |          |          |  |     |          |          |          |          |          |      |          |          |          |          |          |      |          |          |          |          |          |      |          |          |          |          |          |  |   |   |   |  |  |      |          |  |  |  |  |      |          |          |  |  |  |      |          |          |          |  |  |
| 2 B                                                                                                                            | 3.268083                                                                                                                                                                                                                                                                                                                                                                                                                                                                                                                                                                                                                                                                                                                                                                                                                                                                                                                                                                                                                                                                                                                                                                                                                                                                                                                               | 0.000000 |          |          |          |   |   |      |          |  |  |  |  |      |          |          |  |  |  |      |          |          |          |  |  |     |          |          |          |          |  |     |          |          |          |          |          |      |          |          |          |          |          |      |          |          |          |          |          |      |          |          |          |          |          |  |   |   |   |  |  |      |          |  |  |  |  |      |          |          |  |  |  |      |          |          |          |  |  |
| 3 Re                                                                                                                           | 2.433833                                                                                                                                                                                                                                                                                                                                                                                                                                                                                                                                                                                                                                                                                                                                                                                                                                                                                                                                                                                                                                                                                                                                                                                                                                                                                                                               | 3.426616 | 0.000000 |          |          |   |   |      |          |  |  |  |  |      |          |          |  |  |  |      |          |          |          |  |  |     |          |          |          |          |  |     |          |          |          |          |          |      |          |          |          |          |          |      |          |          |          |          |          |      |          |          |          |          |          |  |   |   |   |  |  |      |          |  |  |  |  |      |          |          |  |  |  |      |          |          |          |  |  |
| 4 B                                                                                                                            | 2.352371                                                                                                                                                                                                                                                                                                                                                                                                                                                                                                                                                                                                                                                                                                                                                                                                                                                                                                                                                                                                                                                                                                                                                                                                                                                                                                                               | 1.662026 | 2.337812 | 0.000000 |          |   |   |      |          |  |  |  |  |      |          |          |  |  |  |      |          |          |          |  |  |     |          |          |          |          |  |     |          |          |          |          |          |      |          |          |          |          |          |      |          |          |          |          |          |      |          |          |          |          |          |  |   |   |   |  |  |      |          |  |  |  |  |      |          |          |  |  |  |      |          |          |          |  |  |
| 5 B                                                                                                                            | 2.149644                                                                                                                                                                                                                                                                                                                                                                                                                                                                                                                                                                                                                                                                                                                                                                                                                                                                                                                                                                                                                                                                                                                                                                                                                                                                                                                               | 1.699430 | 3.512886 | 1.825102 | 0.000000 |   |   |      |          |  |  |  |  |      |          |          |  |  |  |      |          |          |          |  |  |     |          |          |          |          |  |     |          |          |          |          |          |      |          |          |          |          |          |      |          |          |          |          |          |      |          |          |          |          |          |  |   |   |   |  |  |      |          |  |  |  |  |      |          |          |  |  |  |      |          |          |          |  |  |
| 6 Re                                                                                                                           | 2.504895                                                                                                                                                                                                                                                                                                                                                                                                                                                                                                                                                                                                                                                                                                                                                                                                                                                                                                                                                                                                                                                                                                                                                                                                                                                                                                                               | 2.257579 | 2.831078 | 2.674571 | 2.263017 |   |   |      |          |  |  |  |  |      |          |          |  |  |  |      |          |          |          |  |  |     |          |          |          |          |  |     |          |          |          |          |          |      |          |          |          |          |          |      |          |          |          |          |          |      |          |          |          |          |          |  |   |   |   |  |  |      |          |  |  |  |  |      |          |          |  |  |  |      |          |          |          |  |  |
| 7 B                                                                                                                            | 2.250469                                                                                                                                                                                                                                                                                                                                                                                                                                                                                                                                                                                                                                                                                                                                                                                                                                                                                                                                                                                                                                                                                                                                                                                                                                                                                                                               | 3.386060 | 2.099102 | 1.731216 | 3.018199 |   |   |      |          |  |  |  |  |      |          |          |  |  |  |      |          |          |          |  |  |     |          |          |          |          |  |     |          |          |          |          |          |      |          |          |          |          |          |      |          |          |          |          |          |      |          |          |          |          |          |  |   |   |   |  |  |      |          |  |  |  |  |      |          |          |  |  |  |      |          |          |          |  |  |
| 8 B                                                                                                                            | 3.286728                                                                                                                                                                                                                                                                                                                                                                                                                                                                                                                                                                                                                                                                                                                                                                                                                                                                                                                                                                                                                                                                                                                                                                                                                                                                                                                               | 1.763193 | 2.179060 | 1.773168 | 2.859248 |   |   |      |          |  |  |  |  |      |          |          |  |  |  |      |          |          |          |  |  |     |          |          |          |          |  |     |          |          |          |          |          |      |          |          |          |          |          |      |          |          |          |          |          |      |          |          |          |          |          |  |   |   |   |  |  |      |          |  |  |  |  |      |          |          |  |  |  |      |          |          |          |  |  |
|                                                                                                                                | 6                                                                                                                                                                                                                                                                                                                                                                                                                                                                                                                                                                                                                                                                                                                                                                                                                                                                                                                                                                                                                                                                                                                                                                                                                                                                                                                                      | 7        | 8        |          |          |   |   |      |          |  |  |  |  |      |          |          |  |  |  |      |          |          |          |  |  |     |          |          |          |          |  |     |          |          |          |          |          |      |          |          |          |          |          |      |          |          |          |          |          |      |          |          |          |          |          |  |   |   |   |  |  |      |          |  |  |  |  |      |          |          |  |  |  |      |          |          |          |  |  |
| 6 Re                                                                                                                           | 0.000000                                                                                                                                                                                                                                                                                                                                                                                                                                                                                                                                                                                                                                                                                                                                                                                                                                                                                                                                                                                                                                                                                                                                                                                                                                                                                                                               |          |          |          |          |   |   |      |          |  |  |  |  |      |          |          |  |  |  |      |          |          |          |  |  |     |          |          |          |          |  |     |          |          |          |          |          |      |          |          |          |          |          |      |          |          |          |          |          |      |          |          |          |          |          |  |   |   |   |  |  |      |          |  |  |  |  |      |          |          |  |  |  |      |          |          |          |  |  |
| 7 B                                                                                                                            | 3.772801                                                                                                                                                                                                                                                                                                                                                                                                                                                                                                                                                                                                                                                                                                                                                                                                                                                                                                                                                                                                                                                                                                                                                                                                                                                                                                                               | 0.000000 |          |          |          |   |   |      |          |  |  |  |  |      |          |          |  |  |  |      |          |          |          |  |  |     |          |          |          |          |  |     |          |          |          |          |          |      |          |          |          |          |          |      |          |          |          |          |          |      |          |          |          |          |          |  |   |   |   |  |  |      |          |  |  |  |  |      |          |          |  |  |  |      |          |          |          |  |  |
| 8 B                                                                                                                            | 2.212488                                                                                                                                                                                                                                                                                                                                                                                                                                                                                                                                                                                                                                                                                                                                                                                                                                                                                                                                                                                                                                                                                                                                                                                                                                                                                                                               | 3.010857 | 0.000000 |          |          |   |   |      |          |  |  |  |  |      |          |          |  |  |  |      |          |          |          |  |  |     |          |          |          |          |  |     |          |          |          |          |          |      |          |          |          |          |          |      |          |          |          |          |          |      |          |          |          |          |          |  |   |   |   |  |  |      |          |  |  |  |  |      |          |          |  |  |  |      |          |          |          |  |  |

Table S4C. Energy ranking for all of the Cp<sub>3</sub>Re<sub>3</sub>B<sub>5</sub>H<sub>5</sub> optimized structures after B3LYP/6-31G(d) optimizations:

| No. | Structure                  | Final energy (a.u.) | $\Delta E$<br>(kcal/mol) |
|-----|----------------------------|---------------------|--------------------------|
| 1   | 08v-06-Bipireex_re a       | -942.6499348        | 0.00                     |
| 2   | 08v-06-Bipireex_re c       | -942.6392326        | 6.72                     |
| 3   | 08v-02-Bisdisph_re e       | -942.6392279        | 6.72                     |
| 4   | 08v-05-AntiprTrig_re e     | -942.6392250        | 6.72                     |
| 5   | 08v-03-Cube-re c           | -942.6392246        | 6.72                     |
| 6   | 08v-01-DicapOh_re h        | -942.6392151        | 6.73                     |
| 7   | 08v-01-DicapOh_re c        | -942.6326545        | 10.84                    |
| 8   | 08v-04-Antipr_re d         | -942.6324644        | 10.96                    |
| 9   | 08v-02-Bisdisph_re h _i-12 | -942.6323409        | 11.04                    |
| 10  | 08v-02-Bisdisph_re h _r-12 | -942.6322929        | 11.07                    |
| 11  | 08v-05-AntiprTrig_re g     | -942.6299197        | 12.56                    |
| 12  | 08v-03-Cube-re b           | -942.6286897        | 13.33                    |
| 13  | 08v-04-Antipr_re b         | -942.6283881        | 13.52                    |
| 14  | 08v-04-Antipr_re a         | -942.6283877        | 13.52                    |
| 15  | 08v-02-Bisdisph_re c       | -942.6283653        | 13.54                    |
| 16  | 08v-07-Tdallcap_re c       | -942.6283646        | 13.54                    |
| 17  | 08v-02-Bisdisph_re g _r-22 | -942.6278938        | 13.83                    |
| 18  | 08v-02-Bisdisph_re g _i-22 | -942.6274290        | 14.12                    |
| 19  | 08v-07-Tdallcap_re h       | -942.6259391        | 15.06                    |
| 20  | 08v-07-Tdallcap_re d       | -942.6135971        | 22.80                    |
| 21  | 08v-07-Tdallcap_re b       | -942.6135960        | 22.80                    |
| 22  | 08v-03-Cube-re a           | -942.6135933        | 22.81                    |
| 23  | 08v-01-DicapOh_re g        | -942.6135902        | 22.81                    |
| 24  | 08v-06-Bipireex_re f       | -942.6119385        | 23.84                    |
| 25  | 08v-01-DicapOh_re b _i-34  | -942.6110809        | 24.38                    |
| 26  | 08v-01-DicapOh_re b _r-34  | -942.6108209        | 24.54                    |
| 27  | 08v-03-Cube-re d           | -942.6072503        | 26.79                    |
| 28  | 08v-05-AntiprTrig_re f     | -942.6072503        | 26.79                    |
| 29  | 08v-06-Bipireex_re d       | -942.6072117        | 26.81                    |
| 30  | 08v-01-DicapOh_re e        | -942.6063000        | 27.38                    |
| 31  | 08v-02-Bisdisph_re b       | -942.6033783        | 29.22                    |
| 32  | 08v-04-Antipr_re c         | -942.6033122        | 29.26                    |
| 33  | 08v-07-Tdallcap_re f       | -942.6001414        | 31.25                    |
| 34  | 08v-07-Tdallcap_re a       | -942.5933278        | 35.52                    |
| 35  | 08v-05-AntiprTrig_re b     | -942.5917148        | 36.53                    |
| 36  | 08v-07-Tdallcap_re g       | -942.5911659        | 36.88                    |
| 37  | 08v-02-Bisdisph_re a       | -942.5909139        | 37.04                    |

|    |                        |              |       |
|----|------------------------|--------------|-------|
| 38 | 08v-01-DicapOh_re i    | -942.5896298 | 37.84 |
| 39 | 08v-02-Bisdisph_re d   | -942.5891803 | 38.12 |
| 40 | 08v-01-DicapOh_re k    | -942.5863539 | 39.90 |
| 41 | 08v-06-Bipireex_re e   | -942.5794550 | 44.23 |
| 42 | 08v-05-AntiprTrig_re a | -942.5794512 | 44.23 |
| 43 | 08v-02-Bisdisph_re f   | -942.5786788 | 44.71 |
| 44 | 08v-02-Bisdisph_re i   | -942.5706050 | 49.78 |
| 45 | 08v-06-Bipireex_re b   | -942.5693774 | 50.55 |
| 46 | 08v-01-DicapOh_re d    | -942.5669221 | 52.09 |
| 47 | 08v-01-DicapOh_re a    | -942.5655155 | 52.97 |
| 48 | 08v-01-DicapOh_re f    | -942.5622852 | 55.00 |
| 49 | 08v-07-Tdallcap_re e   | -942.5471122 | 64.52 |
| 50 | 08v-05-AntiprTrig_re h | -942.5458102 | 65.34 |
| 51 | 08v-01-DicapOh_re j    | -942.5334574 | 73.09 |
| 52 | 08v-05-AntiprTrig_re c | -942.5265850 | 77.40 |
| 53 | 08v-05-AntiprTrig_re d | -942.5265849 | 77.40 |

Table S5A. Initial  $\text{Cp}_3\text{Re}_3\text{B}_6\text{H}_6$  structures, 55 structures.

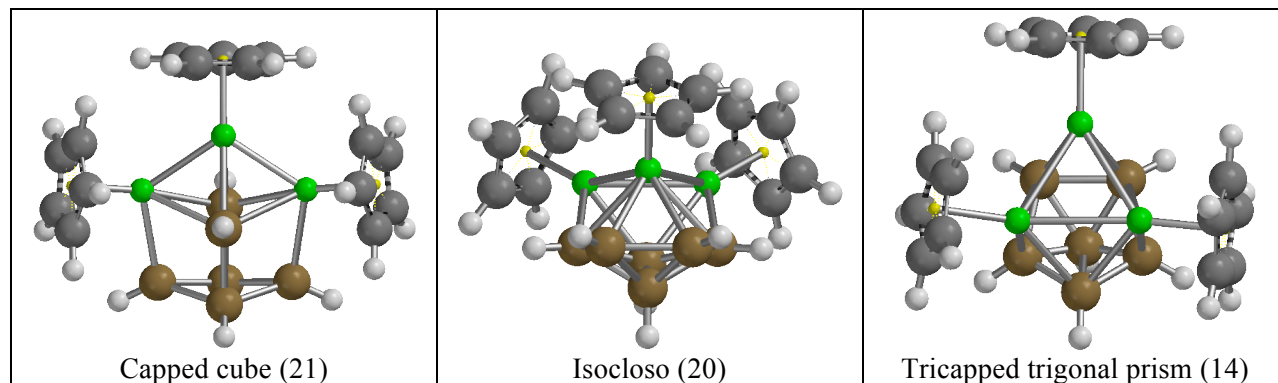



Table S5B. Distance table for the lowest-lying  $\text{Cp}_3\text{Re}_3\text{B}_6\text{H}_6$  structures after M06L/6-311G(d,p) optimization. Included are the ZPcorrected E (a.u.), relative energy (kcal/mol) and symmetry. For clarity only the atoms forming the cluster framework are presented.

| 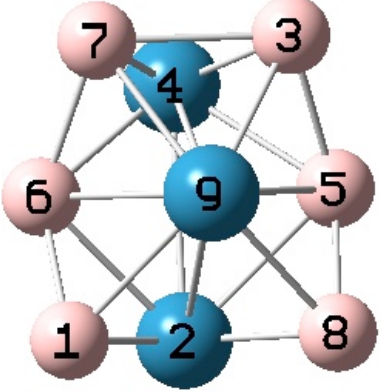 <p>1. -968.4254255 0.0 <math>C_s</math></p>         | <table border="1"> <thead> <tr> <th></th> <th>1</th> <th>2</th> <th>3</th> <th>4</th> <th>5</th> </tr> </thead> <tbody> <tr><td>1 B</td><td>0.000000</td><td></td><td></td><td></td><td></td></tr> <tr><td>2 Re</td><td>2.043289</td><td>0.000000</td><td></td><td></td><td></td></tr> <tr><td>3 B</td><td>4.006405</td><td>3.598477</td><td>0.000000</td><td></td><td></td></tr> <tr><td>4 Re</td><td>3.534431</td><td>2.721175</td><td>2.041483</td><td>0.000000</td><td></td></tr> <tr><td>5 B</td><td>3.462501</td><td>2.289339</td><td>1.849449</td><td>2.174010</td><td>0.000000</td></tr> <tr><td>6 B</td><td>1.742496</td><td>2.292059</td><td>3.149453</td><td>2.177267</td><td>3.129007</td></tr> <tr><td>7 B</td><td>3.179167</td><td>3.597802</td><td>2.068096</td><td>2.043022</td><td>3.142641</td></tr> <tr><td>8 B</td><td>2.855023</td><td>2.040420</td><td>3.178102</td><td>3.532505</td><td>1.745050</td></tr> <tr><td>9 Re</td><td>2.244180</td><td>2.776954</td><td>2.190301</td><td>2.927234</td><td>2.307667</td></tr> <tr> <td></td> <td>6</td> <td>7</td> <td>8</td> <td>9</td> <td></td> </tr> <tr><td>7 B</td><td>1.852740</td><td>0.000000</td><td></td><td></td><td></td></tr> <tr><td>8 B</td><td>3.458224</td><td>3.995617</td><td>0.000000</td><td></td><td></td></tr> <tr><td>9 Re</td><td>2.306336</td><td>2.182123</td><td>2.238682</td><td>0.000000</td><td></td></tr> </tbody> </table> |          | 1        | 2        | 3        | 4 | 5 | 1 B  | 0.000000 |  |  |  |  | 2 Re | 2.043289 | 0.000000 |  |  |  | 3 B  | 4.006405 | 3.598477 | 0.000000 |  |  | 4 Re | 3.534431 | 2.721175 | 2.041483 | 0.000000 |  | 5 B  | 3.462501 | 2.289339 | 1.849449 | 2.174010 | 0.000000 | 6 B  | 1.742496 | 2.292059 | 3.149453 | 2.177267 | 3.129007 | 7 B | 3.179167 | 3.597802 | 2.068096 | 2.043022 | 3.142641 | 8 B  | 2.855023 | 2.040420 | 3.178102 | 3.532505 | 1.745050 | 9 Re | 2.244180 | 2.776954 | 2.190301 | 2.927234 | 2.307667 |  | 6 | 7 | 8 | 9 |  | 7 B | 1.852740 | 0.000000 |  |  |  | 8 B  | 3.458224 | 3.995617 | 0.000000 |  |  | 9 Re | 2.306336 | 2.182123 | 2.238682 | 0.000000 |  |
|---------------------------------------------------------------------------------------------------------------------------------------|------------------------------------------------------------------------------------------------------------------------------------------------------------------------------------------------------------------------------------------------------------------------------------------------------------------------------------------------------------------------------------------------------------------------------------------------------------------------------------------------------------------------------------------------------------------------------------------------------------------------------------------------------------------------------------------------------------------------------------------------------------------------------------------------------------------------------------------------------------------------------------------------------------------------------------------------------------------------------------------------------------------------------------------------------------------------------------------------------------------------------------------------------------------------------------------------------------------------------------------------------------------------------------------------------------------------------------------------------------------------------------------------------------------------------|----------|----------|----------|----------|---|---|------|----------|--|--|--|--|------|----------|----------|--|--|--|------|----------|----------|----------|--|--|------|----------|----------|----------|----------|--|------|----------|----------|----------|----------|----------|------|----------|----------|----------|----------|----------|-----|----------|----------|----------|----------|----------|------|----------|----------|----------|----------|----------|------|----------|----------|----------|----------|----------|--|---|---|---|---|--|-----|----------|----------|--|--|--|------|----------|----------|----------|--|--|------|----------|----------|----------|----------|--|
|                                                                                                                                       | 1                                                                                                                                                                                                                                                                                                                                                                                                                                                                                                                                                                                                                                                                                                                                                                                                                                                                                                                                                                                                                                                                                                                                                                                                                                                                                                                                                                                                                            | 2        | 3        | 4        | 5        |   |   |      |          |  |  |  |  |      |          |          |  |  |  |      |          |          |          |  |  |      |          |          |          |          |  |      |          |          |          |          |          |      |          |          |          |          |          |     |          |          |          |          |          |      |          |          |          |          |          |      |          |          |          |          |          |  |   |   |   |   |  |     |          |          |  |  |  |      |          |          |          |  |  |      |          |          |          |          |  |
| 1 B                                                                                                                                   | 0.000000                                                                                                                                                                                                                                                                                                                                                                                                                                                                                                                                                                                                                                                                                                                                                                                                                                                                                                                                                                                                                                                                                                                                                                                                                                                                                                                                                                                                                     |          |          |          |          |   |   |      |          |  |  |  |  |      |          |          |  |  |  |      |          |          |          |  |  |      |          |          |          |          |  |      |          |          |          |          |          |      |          |          |          |          |          |     |          |          |          |          |          |      |          |          |          |          |          |      |          |          |          |          |          |  |   |   |   |   |  |     |          |          |  |  |  |      |          |          |          |  |  |      |          |          |          |          |  |
| 2 Re                                                                                                                                  | 2.043289                                                                                                                                                                                                                                                                                                                                                                                                                                                                                                                                                                                                                                                                                                                                                                                                                                                                                                                                                                                                                                                                                                                                                                                                                                                                                                                                                                                                                     | 0.000000 |          |          |          |   |   |      |          |  |  |  |  |      |          |          |  |  |  |      |          |          |          |  |  |      |          |          |          |          |  |      |          |          |          |          |          |      |          |          |          |          |          |     |          |          |          |          |          |      |          |          |          |          |          |      |          |          |          |          |          |  |   |   |   |   |  |     |          |          |  |  |  |      |          |          |          |  |  |      |          |          |          |          |  |
| 3 B                                                                                                                                   | 4.006405                                                                                                                                                                                                                                                                                                                                                                                                                                                                                                                                                                                                                                                                                                                                                                                                                                                                                                                                                                                                                                                                                                                                                                                                                                                                                                                                                                                                                     | 3.598477 | 0.000000 |          |          |   |   |      |          |  |  |  |  |      |          |          |  |  |  |      |          |          |          |  |  |      |          |          |          |          |  |      |          |          |          |          |          |      |          |          |          |          |          |     |          |          |          |          |          |      |          |          |          |          |          |      |          |          |          |          |          |  |   |   |   |   |  |     |          |          |  |  |  |      |          |          |          |  |  |      |          |          |          |          |  |
| 4 Re                                                                                                                                  | 3.534431                                                                                                                                                                                                                                                                                                                                                                                                                                                                                                                                                                                                                                                                                                                                                                                                                                                                                                                                                                                                                                                                                                                                                                                                                                                                                                                                                                                                                     | 2.721175 | 2.041483 | 0.000000 |          |   |   |      |          |  |  |  |  |      |          |          |  |  |  |      |          |          |          |  |  |      |          |          |          |          |  |      |          |          |          |          |          |      |          |          |          |          |          |     |          |          |          |          |          |      |          |          |          |          |          |      |          |          |          |          |          |  |   |   |   |   |  |     |          |          |  |  |  |      |          |          |          |  |  |      |          |          |          |          |  |
| 5 B                                                                                                                                   | 3.462501                                                                                                                                                                                                                                                                                                                                                                                                                                                                                                                                                                                                                                                                                                                                                                                                                                                                                                                                                                                                                                                                                                                                                                                                                                                                                                                                                                                                                     | 2.289339 | 1.849449 | 2.174010 | 0.000000 |   |   |      |          |  |  |  |  |      |          |          |  |  |  |      |          |          |          |  |  |      |          |          |          |          |  |      |          |          |          |          |          |      |          |          |          |          |          |     |          |          |          |          |          |      |          |          |          |          |          |      |          |          |          |          |          |  |   |   |   |   |  |     |          |          |  |  |  |      |          |          |          |  |  |      |          |          |          |          |  |
| 6 B                                                                                                                                   | 1.742496                                                                                                                                                                                                                                                                                                                                                                                                                                                                                                                                                                                                                                                                                                                                                                                                                                                                                                                                                                                                                                                                                                                                                                                                                                                                                                                                                                                                                     | 2.292059 | 3.149453 | 2.177267 | 3.129007 |   |   |      |          |  |  |  |  |      |          |          |  |  |  |      |          |          |          |  |  |      |          |          |          |          |  |      |          |          |          |          |          |      |          |          |          |          |          |     |          |          |          |          |          |      |          |          |          |          |          |      |          |          |          |          |          |  |   |   |   |   |  |     |          |          |  |  |  |      |          |          |          |  |  |      |          |          |          |          |  |
| 7 B                                                                                                                                   | 3.179167                                                                                                                                                                                                                                                                                                                                                                                                                                                                                                                                                                                                                                                                                                                                                                                                                                                                                                                                                                                                                                                                                                                                                                                                                                                                                                                                                                                                                     | 3.597802 | 2.068096 | 2.043022 | 3.142641 |   |   |      |          |  |  |  |  |      |          |          |  |  |  |      |          |          |          |  |  |      |          |          |          |          |  |      |          |          |          |          |          |      |          |          |          |          |          |     |          |          |          |          |          |      |          |          |          |          |          |      |          |          |          |          |          |  |   |   |   |   |  |     |          |          |  |  |  |      |          |          |          |  |  |      |          |          |          |          |  |
| 8 B                                                                                                                                   | 2.855023                                                                                                                                                                                                                                                                                                                                                                                                                                                                                                                                                                                                                                                                                                                                                                                                                                                                                                                                                                                                                                                                                                                                                                                                                                                                                                                                                                                                                     | 2.040420 | 3.178102 | 3.532505 | 1.745050 |   |   |      |          |  |  |  |  |      |          |          |  |  |  |      |          |          |          |  |  |      |          |          |          |          |  |      |          |          |          |          |          |      |          |          |          |          |          |     |          |          |          |          |          |      |          |          |          |          |          |      |          |          |          |          |          |  |   |   |   |   |  |     |          |          |  |  |  |      |          |          |          |  |  |      |          |          |          |          |  |
| 9 Re                                                                                                                                  | 2.244180                                                                                                                                                                                                                                                                                                                                                                                                                                                                                                                                                                                                                                                                                                                                                                                                                                                                                                                                                                                                                                                                                                                                                                                                                                                                                                                                                                                                                     | 2.776954 | 2.190301 | 2.927234 | 2.307667 |   |   |      |          |  |  |  |  |      |          |          |  |  |  |      |          |          |          |  |  |      |          |          |          |          |  |      |          |          |          |          |          |      |          |          |          |          |          |     |          |          |          |          |          |      |          |          |          |          |          |      |          |          |          |          |          |  |   |   |   |   |  |     |          |          |  |  |  |      |          |          |          |  |  |      |          |          |          |          |  |
|                                                                                                                                       | 6                                                                                                                                                                                                                                                                                                                                                                                                                                                                                                                                                                                                                                                                                                                                                                                                                                                                                                                                                                                                                                                                                                                                                                                                                                                                                                                                                                                                                            | 7        | 8        | 9        |          |   |   |      |          |  |  |  |  |      |          |          |  |  |  |      |          |          |          |  |  |      |          |          |          |          |  |      |          |          |          |          |          |      |          |          |          |          |          |     |          |          |          |          |          |      |          |          |          |          |          |      |          |          |          |          |          |  |   |   |   |   |  |     |          |          |  |  |  |      |          |          |          |  |  |      |          |          |          |          |  |
| 7 B                                                                                                                                   | 1.852740                                                                                                                                                                                                                                                                                                                                                                                                                                                                                                                                                                                                                                                                                                                                                                                                                                                                                                                                                                                                                                                                                                                                                                                                                                                                                                                                                                                                                     | 0.000000 |          |          |          |   |   |      |          |  |  |  |  |      |          |          |  |  |  |      |          |          |          |  |  |      |          |          |          |          |  |      |          |          |          |          |          |      |          |          |          |          |          |     |          |          |          |          |          |      |          |          |          |          |          |      |          |          |          |          |          |  |   |   |   |   |  |     |          |          |  |  |  |      |          |          |          |  |  |      |          |          |          |          |  |
| 8 B                                                                                                                                   | 3.458224                                                                                                                                                                                                                                                                                                                                                                                                                                                                                                                                                                                                                                                                                                                                                                                                                                                                                                                                                                                                                                                                                                                                                                                                                                                                                                                                                                                                                     | 3.995617 | 0.000000 |          |          |   |   |      |          |  |  |  |  |      |          |          |  |  |  |      |          |          |          |  |  |      |          |          |          |          |  |      |          |          |          |          |          |      |          |          |          |          |          |     |          |          |          |          |          |      |          |          |          |          |          |      |          |          |          |          |          |  |   |   |   |   |  |     |          |          |  |  |  |      |          |          |          |  |  |      |          |          |          |          |  |
| 9 Re                                                                                                                                  | 2.306336                                                                                                                                                                                                                                                                                                                                                                                                                                                                                                                                                                                                                                                                                                                                                                                                                                                                                                                                                                                                                                                                                                                                                                                                                                                                                                                                                                                                                     | 2.182123 | 2.238682 | 0.000000 |          |   |   |      |          |  |  |  |  |      |          |          |  |  |  |      |          |          |          |  |  |      |          |          |          |          |  |      |          |          |          |          |          |      |          |          |          |          |          |     |          |          |          |          |          |      |          |          |          |          |          |      |          |          |          |          |          |  |   |   |   |   |  |     |          |          |  |  |  |      |          |          |          |  |  |      |          |          |          |          |  |
|  <p>2. -968.4125768 +8.1 <math>C_s</math></p>       | <table border="1"> <thead> <tr> <th></th> <th>1</th> <th>2</th> <th>3</th> <th>4</th> <th>5</th> </tr> </thead> <tbody> <tr><td>1 Re</td><td>0.000000</td><td></td><td></td><td></td><td></td></tr> <tr><td>2 B</td><td>2.261623</td><td>0.000000</td><td></td><td></td><td></td></tr> <tr><td>3 B</td><td>2.266672</td><td>1.703883</td><td>0.000000</td><td></td><td></td></tr> <tr><td>4 B</td><td>2.283028</td><td>3.495433</td><td>3.488746</td><td>0.000000</td><td></td></tr> <tr><td>5 Re</td><td>2.815750</td><td>2.250186</td><td>3.058319</td><td>2.241595</td><td>0.000000</td></tr> <tr><td>6 Re</td><td>2.835095</td><td>3.068617</td><td>2.248582</td><td>2.247168</td><td>2.538425</td></tr> <tr><td>7 B</td><td>2.107668</td><td>3.796768</td><td>3.039585</td><td>1.752015</td><td>3.470795</td></tr> <tr><td>8 B</td><td>2.109691</td><td>3.058421</td><td>3.807495</td><td>1.755823</td><td>2.098155</td></tr> <tr><td>9 B</td><td>3.210948</td><td>1.707580</td><td>1.708087</td><td>3.585113</td><td>2.221728</td></tr> <tr> <td></td> <td>6</td> <td>7</td> <td>8</td> <td>9</td> <td></td> </tr> <tr><td>7 B</td><td>2.104268</td><td>0.000000</td><td></td><td></td><td></td></tr> <tr><td>8 B</td><td>3.486801</td><td>3.028335</td><td>0.000000</td><td></td><td></td></tr> <tr><td>9 B</td><td>2.225209</td><td>3.844176</td><td>3.851772</td><td>0.000000</td><td></td></tr> </tbody> </table>  |          | 1        | 2        | 3        | 4 | 5 | 1 Re | 0.000000 |  |  |  |  | 2 B  | 2.261623 | 0.000000 |  |  |  | 3 B  | 2.266672 | 1.703883 | 0.000000 |  |  | 4 B  | 2.283028 | 3.495433 | 3.488746 | 0.000000 |  | 5 Re | 2.815750 | 2.250186 | 3.058319 | 2.241595 | 0.000000 | 6 Re | 2.835095 | 3.068617 | 2.248582 | 2.247168 | 2.538425 | 7 B | 2.107668 | 3.796768 | 3.039585 | 1.752015 | 3.470795 | 8 B  | 2.109691 | 3.058421 | 3.807495 | 1.755823 | 2.098155 | 9 B  | 3.210948 | 1.707580 | 1.708087 | 3.585113 | 2.221728 |  | 6 | 7 | 8 | 9 |  | 7 B | 2.104268 | 0.000000 |  |  |  | 8 B  | 3.486801 | 3.028335 | 0.000000 |  |  | 9 B  | 2.225209 | 3.844176 | 3.851772 | 0.000000 |  |
|                                                                                                                                       | 1                                                                                                                                                                                                                                                                                                                                                                                                                                                                                                                                                                                                                                                                                                                                                                                                                                                                                                                                                                                                                                                                                                                                                                                                                                                                                                                                                                                                                            | 2        | 3        | 4        | 5        |   |   |      |          |  |  |  |  |      |          |          |  |  |  |      |          |          |          |  |  |      |          |          |          |          |  |      |          |          |          |          |          |      |          |          |          |          |          |     |          |          |          |          |          |      |          |          |          |          |          |      |          |          |          |          |          |  |   |   |   |   |  |     |          |          |  |  |  |      |          |          |          |  |  |      |          |          |          |          |  |
| 1 Re                                                                                                                                  | 0.000000                                                                                                                                                                                                                                                                                                                                                                                                                                                                                                                                                                                                                                                                                                                                                                                                                                                                                                                                                                                                                                                                                                                                                                                                                                                                                                                                                                                                                     |          |          |          |          |   |   |      |          |  |  |  |  |      |          |          |  |  |  |      |          |          |          |  |  |      |          |          |          |          |  |      |          |          |          |          |          |      |          |          |          |          |          |     |          |          |          |          |          |      |          |          |          |          |          |      |          |          |          |          |          |  |   |   |   |   |  |     |          |          |  |  |  |      |          |          |          |  |  |      |          |          |          |          |  |
| 2 B                                                                                                                                   | 2.261623                                                                                                                                                                                                                                                                                                                                                                                                                                                                                                                                                                                                                                                                                                                                                                                                                                                                                                                                                                                                                                                                                                                                                                                                                                                                                                                                                                                                                     | 0.000000 |          |          |          |   |   |      |          |  |  |  |  |      |          |          |  |  |  |      |          |          |          |  |  |      |          |          |          |          |  |      |          |          |          |          |          |      |          |          |          |          |          |     |          |          |          |          |          |      |          |          |          |          |          |      |          |          |          |          |          |  |   |   |   |   |  |     |          |          |  |  |  |      |          |          |          |  |  |      |          |          |          |          |  |
| 3 B                                                                                                                                   | 2.266672                                                                                                                                                                                                                                                                                                                                                                                                                                                                                                                                                                                                                                                                                                                                                                                                                                                                                                                                                                                                                                                                                                                                                                                                                                                                                                                                                                                                                     | 1.703883 | 0.000000 |          |          |   |   |      |          |  |  |  |  |      |          |          |  |  |  |      |          |          |          |  |  |      |          |          |          |          |  |      |          |          |          |          |          |      |          |          |          |          |          |     |          |          |          |          |          |      |          |          |          |          |          |      |          |          |          |          |          |  |   |   |   |   |  |     |          |          |  |  |  |      |          |          |          |  |  |      |          |          |          |          |  |
| 4 B                                                                                                                                   | 2.283028                                                                                                                                                                                                                                                                                                                                                                                                                                                                                                                                                                                                                                                                                                                                                                                                                                                                                                                                                                                                                                                                                                                                                                                                                                                                                                                                                                                                                     | 3.495433 | 3.488746 | 0.000000 |          |   |   |      |          |  |  |  |  |      |          |          |  |  |  |      |          |          |          |  |  |      |          |          |          |          |  |      |          |          |          |          |          |      |          |          |          |          |          |     |          |          |          |          |          |      |          |          |          |          |          |      |          |          |          |          |          |  |   |   |   |   |  |     |          |          |  |  |  |      |          |          |          |  |  |      |          |          |          |          |  |
| 5 Re                                                                                                                                  | 2.815750                                                                                                                                                                                                                                                                                                                                                                                                                                                                                                                                                                                                                                                                                                                                                                                                                                                                                                                                                                                                                                                                                                                                                                                                                                                                                                                                                                                                                     | 2.250186 | 3.058319 | 2.241595 | 0.000000 |   |   |      |          |  |  |  |  |      |          |          |  |  |  |      |          |          |          |  |  |      |          |          |          |          |  |      |          |          |          |          |          |      |          |          |          |          |          |     |          |          |          |          |          |      |          |          |          |          |          |      |          |          |          |          |          |  |   |   |   |   |  |     |          |          |  |  |  |      |          |          |          |  |  |      |          |          |          |          |  |
| 6 Re                                                                                                                                  | 2.835095                                                                                                                                                                                                                                                                                                                                                                                                                                                                                                                                                                                                                                                                                                                                                                                                                                                                                                                                                                                                                                                                                                                                                                                                                                                                                                                                                                                                                     | 3.068617 | 2.248582 | 2.247168 | 2.538425 |   |   |      |          |  |  |  |  |      |          |          |  |  |  |      |          |          |          |  |  |      |          |          |          |          |  |      |          |          |          |          |          |      |          |          |          |          |          |     |          |          |          |          |          |      |          |          |          |          |          |      |          |          |          |          |          |  |   |   |   |   |  |     |          |          |  |  |  |      |          |          |          |  |  |      |          |          |          |          |  |
| 7 B                                                                                                                                   | 2.107668                                                                                                                                                                                                                                                                                                                                                                                                                                                                                                                                                                                                                                                                                                                                                                                                                                                                                                                                                                                                                                                                                                                                                                                                                                                                                                                                                                                                                     | 3.796768 | 3.039585 | 1.752015 | 3.470795 |   |   |      |          |  |  |  |  |      |          |          |  |  |  |      |          |          |          |  |  |      |          |          |          |          |  |      |          |          |          |          |          |      |          |          |          |          |          |     |          |          |          |          |          |      |          |          |          |          |          |      |          |          |          |          |          |  |   |   |   |   |  |     |          |          |  |  |  |      |          |          |          |  |  |      |          |          |          |          |  |
| 8 B                                                                                                                                   | 2.109691                                                                                                                                                                                                                                                                                                                                                                                                                                                                                                                                                                                                                                                                                                                                                                                                                                                                                                                                                                                                                                                                                                                                                                                                                                                                                                                                                                                                                     | 3.058421 | 3.807495 | 1.755823 | 2.098155 |   |   |      |          |  |  |  |  |      |          |          |  |  |  |      |          |          |          |  |  |      |          |          |          |          |  |      |          |          |          |          |          |      |          |          |          |          |          |     |          |          |          |          |          |      |          |          |          |          |          |      |          |          |          |          |          |  |   |   |   |   |  |     |          |          |  |  |  |      |          |          |          |  |  |      |          |          |          |          |  |
| 9 B                                                                                                                                   | 3.210948                                                                                                                                                                                                                                                                                                                                                                                                                                                                                                                                                                                                                                                                                                                                                                                                                                                                                                                                                                                                                                                                                                                                                                                                                                                                                                                                                                                                                     | 1.707580 | 1.708087 | 3.585113 | 2.221728 |   |   |      |          |  |  |  |  |      |          |          |  |  |  |      |          |          |          |  |  |      |          |          |          |          |  |      |          |          |          |          |          |      |          |          |          |          |          |     |          |          |          |          |          |      |          |          |          |          |          |      |          |          |          |          |          |  |   |   |   |   |  |     |          |          |  |  |  |      |          |          |          |  |  |      |          |          |          |          |  |
|                                                                                                                                       | 6                                                                                                                                                                                                                                                                                                                                                                                                                                                                                                                                                                                                                                                                                                                                                                                                                                                                                                                                                                                                                                                                                                                                                                                                                                                                                                                                                                                                                            | 7        | 8        | 9        |          |   |   |      |          |  |  |  |  |      |          |          |  |  |  |      |          |          |          |  |  |      |          |          |          |          |  |      |          |          |          |          |          |      |          |          |          |          |          |     |          |          |          |          |          |      |          |          |          |          |          |      |          |          |          |          |          |  |   |   |   |   |  |     |          |          |  |  |  |      |          |          |          |  |  |      |          |          |          |          |  |
| 7 B                                                                                                                                   | 2.104268                                                                                                                                                                                                                                                                                                                                                                                                                                                                                                                                                                                                                                                                                                                                                                                                                                                                                                                                                                                                                                                                                                                                                                                                                                                                                                                                                                                                                     | 0.000000 |          |          |          |   |   |      |          |  |  |  |  |      |          |          |  |  |  |      |          |          |          |  |  |      |          |          |          |          |  |      |          |          |          |          |          |      |          |          |          |          |          |     |          |          |          |          |          |      |          |          |          |          |          |      |          |          |          |          |          |  |   |   |   |   |  |     |          |          |  |  |  |      |          |          |          |  |  |      |          |          |          |          |  |
| 8 B                                                                                                                                   | 3.486801                                                                                                                                                                                                                                                                                                                                                                                                                                                                                                                                                                                                                                                                                                                                                                                                                                                                                                                                                                                                                                                                                                                                                                                                                                                                                                                                                                                                                     | 3.028335 | 0.000000 |          |          |   |   |      |          |  |  |  |  |      |          |          |  |  |  |      |          |          |          |  |  |      |          |          |          |          |  |      |          |          |          |          |          |      |          |          |          |          |          |     |          |          |          |          |          |      |          |          |          |          |          |      |          |          |          |          |          |  |   |   |   |   |  |     |          |          |  |  |  |      |          |          |          |  |  |      |          |          |          |          |  |
| 9 B                                                                                                                                   | 2.225209                                                                                                                                                                                                                                                                                                                                                                                                                                                                                                                                                                                                                                                                                                                                                                                                                                                                                                                                                                                                                                                                                                                                                                                                                                                                                                                                                                                                                     | 3.844176 | 3.851772 | 0.000000 |          |   |   |      |          |  |  |  |  |      |          |          |  |  |  |      |          |          |          |  |  |      |          |          |          |          |  |      |          |          |          |          |          |      |          |          |          |          |          |     |          |          |          |          |          |      |          |          |          |          |          |      |          |          |          |          |          |  |   |   |   |   |  |     |          |          |  |  |  |      |          |          |          |  |  |      |          |          |          |          |  |
|  <p>3. -968.4118200 +8.5 <math>C_1(C_s)</math></p> | <table border="1"> <thead> <tr> <th></th> <th>1</th> <th>2</th> <th>3</th> <th>4</th> <th>5</th> </tr> </thead> <tbody> <tr><td>1 B</td><td>0.000000</td><td></td><td></td><td></td><td></td></tr> <tr><td>2 B</td><td>1.754169</td><td>0.000000</td><td></td><td></td><td></td></tr> <tr><td>3 Re</td><td>3.141008</td><td>3.943045</td><td>0.000000</td><td></td><td></td></tr> <tr><td>4 Re</td><td>2.275283</td><td>2.020693</td><td>2.881956</td><td>0.000000</td><td></td></tr> <tr><td>5 B</td><td>3.406361</td><td>3.109332</td><td>2.177470</td><td>2.083863</td><td>0.000000</td></tr> <tr><td>6 B</td><td>1.743912</td><td>3.067928</td><td>2.227929</td><td>2.179269</td><td>3.220986</td></tr> <tr><td>7 B</td><td>1.744100</td><td>3.221676</td><td>2.250901</td><td>3.228385</td><td>3.500644</td></tr> <tr><td>8 Re</td><td>2.294619</td><td>2.288570</td><td>2.620462</td><td>2.793673</td><td>2.260429</td></tr> <tr><td>9 B</td><td>3.195806</td><td>4.125713</td><td>2.057461</td><td>4.067600</td><td>3.322296</td></tr> <tr> <td></td> <td>6</td> <td>7</td> <td>8</td> <td>9</td> <td></td> </tr> <tr><td>7 B</td><td>1.794788</td><td>0.000000</td><td></td><td></td><td></td></tr> <tr><td>8 Re</td><td>3.074932</td><td>2.273966</td><td>0.000000</td><td></td><td></td></tr> <tr><td>9 B</td><td>3.172164</td><td>1.768743</td><td>2.149018</td><td>0.000000</td><td></td></tr> </tbody> </table> |          | 1        | 2        | 3        | 4 | 5 | 1 B  | 0.000000 |  |  |  |  | 2 B  | 1.754169 | 0.000000 |  |  |  | 3 Re | 3.141008 | 3.943045 | 0.000000 |  |  | 4 Re | 2.275283 | 2.020693 | 2.881956 | 0.000000 |  | 5 B  | 3.406361 | 3.109332 | 2.177470 | 2.083863 | 0.000000 | 6 B  | 1.743912 | 3.067928 | 2.227929 | 2.179269 | 3.220986 | 7 B | 1.744100 | 3.221676 | 2.250901 | 3.228385 | 3.500644 | 8 Re | 2.294619 | 2.288570 | 2.620462 | 2.793673 | 2.260429 | 9 B  | 3.195806 | 4.125713 | 2.057461 | 4.067600 | 3.322296 |  | 6 | 7 | 8 | 9 |  | 7 B | 1.794788 | 0.000000 |  |  |  | 8 Re | 3.074932 | 2.273966 | 0.000000 |  |  | 9 B  | 3.172164 | 1.768743 | 2.149018 | 0.000000 |  |
|                                                                                                                                       | 1                                                                                                                                                                                                                                                                                                                                                                                                                                                                                                                                                                                                                                                                                                                                                                                                                                                                                                                                                                                                                                                                                                                                                                                                                                                                                                                                                                                                                            | 2        | 3        | 4        | 5        |   |   |      |          |  |  |  |  |      |          |          |  |  |  |      |          |          |          |  |  |      |          |          |          |          |  |      |          |          |          |          |          |      |          |          |          |          |          |     |          |          |          |          |          |      |          |          |          |          |          |      |          |          |          |          |          |  |   |   |   |   |  |     |          |          |  |  |  |      |          |          |          |  |  |      |          |          |          |          |  |
| 1 B                                                                                                                                   | 0.000000                                                                                                                                                                                                                                                                                                                                                                                                                                                                                                                                                                                                                                                                                                                                                                                                                                                                                                                                                                                                                                                                                                                                                                                                                                                                                                                                                                                                                     |          |          |          |          |   |   |      |          |  |  |  |  |      |          |          |  |  |  |      |          |          |          |  |  |      |          |          |          |          |  |      |          |          |          |          |          |      |          |          |          |          |          |     |          |          |          |          |          |      |          |          |          |          |          |      |          |          |          |          |          |  |   |   |   |   |  |     |          |          |  |  |  |      |          |          |          |  |  |      |          |          |          |          |  |
| 2 B                                                                                                                                   | 1.754169                                                                                                                                                                                                                                                                                                                                                                                                                                                                                                                                                                                                                                                                                                                                                                                                                                                                                                                                                                                                                                                                                                                                                                                                                                                                                                                                                                                                                     | 0.000000 |          |          |          |   |   |      |          |  |  |  |  |      |          |          |  |  |  |      |          |          |          |  |  |      |          |          |          |          |  |      |          |          |          |          |          |      |          |          |          |          |          |     |          |          |          |          |          |      |          |          |          |          |          |      |          |          |          |          |          |  |   |   |   |   |  |     |          |          |  |  |  |      |          |          |          |  |  |      |          |          |          |          |  |
| 3 Re                                                                                                                                  | 3.141008                                                                                                                                                                                                                                                                                                                                                                                                                                                                                                                                                                                                                                                                                                                                                                                                                                                                                                                                                                                                                                                                                                                                                                                                                                                                                                                                                                                                                     | 3.943045 | 0.000000 |          |          |   |   |      |          |  |  |  |  |      |          |          |  |  |  |      |          |          |          |  |  |      |          |          |          |          |  |      |          |          |          |          |          |      |          |          |          |          |          |     |          |          |          |          |          |      |          |          |          |          |          |      |          |          |          |          |          |  |   |   |   |   |  |     |          |          |  |  |  |      |          |          |          |  |  |      |          |          |          |          |  |
| 4 Re                                                                                                                                  | 2.275283                                                                                                                                                                                                                                                                                                                                                                                                                                                                                                                                                                                                                                                                                                                                                                                                                                                                                                                                                                                                                                                                                                                                                                                                                                                                                                                                                                                                                     | 2.020693 | 2.881956 | 0.000000 |          |   |   |      |          |  |  |  |  |      |          |          |  |  |  |      |          |          |          |  |  |      |          |          |          |          |  |      |          |          |          |          |          |      |          |          |          |          |          |     |          |          |          |          |          |      |          |          |          |          |          |      |          |          |          |          |          |  |   |   |   |   |  |     |          |          |  |  |  |      |          |          |          |  |  |      |          |          |          |          |  |
| 5 B                                                                                                                                   | 3.406361                                                                                                                                                                                                                                                                                                                                                                                                                                                                                                                                                                                                                                                                                                                                                                                                                                                                                                                                                                                                                                                                                                                                                                                                                                                                                                                                                                                                                     | 3.109332 | 2.177470 | 2.083863 | 0.000000 |   |   |      |          |  |  |  |  |      |          |          |  |  |  |      |          |          |          |  |  |      |          |          |          |          |  |      |          |          |          |          |          |      |          |          |          |          |          |     |          |          |          |          |          |      |          |          |          |          |          |      |          |          |          |          |          |  |   |   |   |   |  |     |          |          |  |  |  |      |          |          |          |  |  |      |          |          |          |          |  |
| 6 B                                                                                                                                   | 1.743912                                                                                                                                                                                                                                                                                                                                                                                                                                                                                                                                                                                                                                                                                                                                                                                                                                                                                                                                                                                                                                                                                                                                                                                                                                                                                                                                                                                                                     | 3.067928 | 2.227929 | 2.179269 | 3.220986 |   |   |      |          |  |  |  |  |      |          |          |  |  |  |      |          |          |          |  |  |      |          |          |          |          |  |      |          |          |          |          |          |      |          |          |          |          |          |     |          |          |          |          |          |      |          |          |          |          |          |      |          |          |          |          |          |  |   |   |   |   |  |     |          |          |  |  |  |      |          |          |          |  |  |      |          |          |          |          |  |
| 7 B                                                                                                                                   | 1.744100                                                                                                                                                                                                                                                                                                                                                                                                                                                                                                                                                                                                                                                                                                                                                                                                                                                                                                                                                                                                                                                                                                                                                                                                                                                                                                                                                                                                                     | 3.221676 | 2.250901 | 3.228385 | 3.500644 |   |   |      |          |  |  |  |  |      |          |          |  |  |  |      |          |          |          |  |  |      |          |          |          |          |  |      |          |          |          |          |          |      |          |          |          |          |          |     |          |          |          |          |          |      |          |          |          |          |          |      |          |          |          |          |          |  |   |   |   |   |  |     |          |          |  |  |  |      |          |          |          |  |  |      |          |          |          |          |  |
| 8 Re                                                                                                                                  | 2.294619                                                                                                                                                                                                                                                                                                                                                                                                                                                                                                                                                                                                                                                                                                                                                                                                                                                                                                                                                                                                                                                                                                                                                                                                                                                                                                                                                                                                                     | 2.288570 | 2.620462 | 2.793673 | 2.260429 |   |   |      |          |  |  |  |  |      |          |          |  |  |  |      |          |          |          |  |  |      |          |          |          |          |  |      |          |          |          |          |          |      |          |          |          |          |          |     |          |          |          |          |          |      |          |          |          |          |          |      |          |          |          |          |          |  |   |   |   |   |  |     |          |          |  |  |  |      |          |          |          |  |  |      |          |          |          |          |  |
| 9 B                                                                                                                                   | 3.195806                                                                                                                                                                                                                                                                                                                                                                                                                                                                                                                                                                                                                                                                                                                                                                                                                                                                                                                                                                                                                                                                                                                                                                                                                                                                                                                                                                                                                     | 4.125713 | 2.057461 | 4.067600 | 3.322296 |   |   |      |          |  |  |  |  |      |          |          |  |  |  |      |          |          |          |  |  |      |          |          |          |          |  |      |          |          |          |          |          |      |          |          |          |          |          |     |          |          |          |          |          |      |          |          |          |          |          |      |          |          |          |          |          |  |   |   |   |   |  |     |          |          |  |  |  |      |          |          |          |  |  |      |          |          |          |          |  |
|                                                                                                                                       | 6                                                                                                                                                                                                                                                                                                                                                                                                                                                                                                                                                                                                                                                                                                                                                                                                                                                                                                                                                                                                                                                                                                                                                                                                                                                                                                                                                                                                                            | 7        | 8        | 9        |          |   |   |      |          |  |  |  |  |      |          |          |  |  |  |      |          |          |          |  |  |      |          |          |          |          |  |      |          |          |          |          |          |      |          |          |          |          |          |     |          |          |          |          |          |      |          |          |          |          |          |      |          |          |          |          |          |  |   |   |   |   |  |     |          |          |  |  |  |      |          |          |          |  |  |      |          |          |          |          |  |
| 7 B                                                                                                                                   | 1.794788                                                                                                                                                                                                                                                                                                                                                                                                                                                                                                                                                                                                                                                                                                                                                                                                                                                                                                                                                                                                                                                                                                                                                                                                                                                                                                                                                                                                                     | 0.000000 |          |          |          |   |   |      |          |  |  |  |  |      |          |          |  |  |  |      |          |          |          |  |  |      |          |          |          |          |  |      |          |          |          |          |          |      |          |          |          |          |          |     |          |          |          |          |          |      |          |          |          |          |          |      |          |          |          |          |          |  |   |   |   |   |  |     |          |          |  |  |  |      |          |          |          |  |  |      |          |          |          |          |  |
| 8 Re                                                                                                                                  | 3.074932                                                                                                                                                                                                                                                                                                                                                                                                                                                                                                                                                                                                                                                                                                                                                                                                                                                                                                                                                                                                                                                                                                                                                                                                                                                                                                                                                                                                                     | 2.273966 | 0.000000 |          |          |   |   |      |          |  |  |  |  |      |          |          |  |  |  |      |          |          |          |  |  |      |          |          |          |          |  |      |          |          |          |          |          |      |          |          |          |          |          |     |          |          |          |          |          |      |          |          |          |          |          |      |          |          |          |          |          |  |   |   |   |   |  |     |          |          |  |  |  |      |          |          |          |  |  |      |          |          |          |          |  |
| 9 B                                                                                                                                   | 3.172164                                                                                                                                                                                                                                                                                                                                                                                                                                                                                                                                                                                                                                                                                                                                                                                                                                                                                                                                                                                                                                                                                                                                                                                                                                                                                                                                                                                                                     | 1.768743 | 2.149018 | 0.000000 |          |   |   |      |          |  |  |  |  |      |          |          |  |  |  |      |          |          |          |  |  |      |          |          |          |          |  |      |          |          |          |          |          |      |          |          |          |          |          |     |          |          |          |          |          |      |          |          |          |          |          |      |          |          |          |          |          |  |   |   |   |   |  |     |          |          |  |  |  |      |          |          |          |  |  |      |          |          |          |          |  |

| 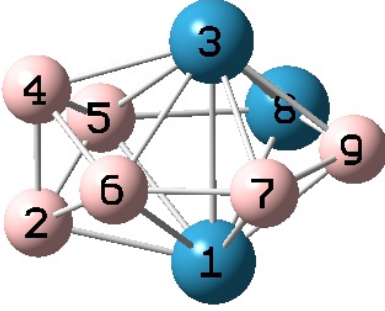 <p>4. -968.3985149 +16.9 (C<sub>s</sub>)</p> | <table border="1"> <thead> <tr> <th></th> <th>1</th> <th>2</th> <th>3</th> <th>4</th> <th>5</th> </tr> </thead> <tbody> <tr><td>1 Re</td><td>0.000000</td><td></td><td></td><td></td><td></td></tr> <tr><td>2 B</td><td>2.175175</td><td>0.000000</td><td></td><td></td><td></td></tr> <tr><td>3 Re</td><td>2.805520</td><td>3.081262</td><td>0.000000</td><td></td><td></td></tr> <tr><td>4 B</td><td>3.072599</td><td>1.682294</td><td>2.183010</td><td>0.000000</td><td></td></tr> <tr><td>5 B</td><td>2.295363</td><td>1.754350</td><td>2.298576</td><td>1.730794</td><td>0.000000</td></tr> <tr><td>6 B</td><td>2.271090</td><td>1.752261</td><td>2.269025</td><td>1.765299</td><td>2.568554</td></tr> <tr><td>7 B</td><td>2.140871</td><td>3.168903</td><td>2.138550</td><td>3.180374</td><td>3.353790</td></tr> <tr><td>8 Re</td><td>2.552917</td><td>3.759429</td><td>2.765236</td><td>3.833609</td><td>2.398658</td></tr> <tr><td>9 B</td><td>2.200984</td><td>3.892955</td><td>2.201371</td><td>3.893852</td><td>3.262626</td></tr> <tr> <th></th> <th>6</th> <th>7</th> <th>8</th> <th>9</th> <th></th> </tr> <tr><td>6 B</td><td>0.000000</td><td></td><td></td><td></td><td></td></tr> <tr><td>7 B</td><td>1.810937</td><td>0.000000</td><td></td><td></td><td></td></tr> <tr><td>8 Re</td><td>3.992922</td><td>3.574627</td><td>0.000000</td><td></td><td></td></tr> <tr><td>9 B</td><td>3.190321</td><td>1.869666</td><td>2.189685</td><td>0.000000</td><td></td></tr> </tbody> </table> |          | 1        | 2        | 3        | 4 | 5 | 1 Re | 0.000000 |  |  |  |  | 2 B | 2.175175 | 0.000000 |  |  |  | 3 Re | 2.805520 | 3.081262 | 0.000000 |  |  | 4 B  | 3.072599 | 1.682294 | 2.183010 | 0.000000 |  | 5 B  | 2.295363 | 1.754350 | 2.298576 | 1.730794 | 0.000000 | 6 B  | 2.271090 | 1.752261 | 2.269025 | 1.765299 | 2.568554 | 7 B | 2.140871 | 3.168903 | 2.138550 | 3.180374 | 3.353790 | 8 Re | 2.552917 | 3.759429 | 2.765236 | 3.833609 | 2.398658 | 9 B  | 2.200984 | 3.892955 | 2.201371 | 3.893852 | 3.262626 |  | 6 | 7 | 8 | 9 |  | 6 B  | 0.000000 |  |  |  |  | 7 B | 1.810937 | 0.000000 |  |  |  | 8 Re | 3.992922 | 3.574627 | 0.000000 |  |  | 9 B  | 3.190321 | 1.869666 | 2.189685 | 0.000000 |  |
|--------------------------------------------------------------------------------------------------------------------------------|---------------------------------------------------------------------------------------------------------------------------------------------------------------------------------------------------------------------------------------------------------------------------------------------------------------------------------------------------------------------------------------------------------------------------------------------------------------------------------------------------------------------------------------------------------------------------------------------------------------------------------------------------------------------------------------------------------------------------------------------------------------------------------------------------------------------------------------------------------------------------------------------------------------------------------------------------------------------------------------------------------------------------------------------------------------------------------------------------------------------------------------------------------------------------------------------------------------------------------------------------------------------------------------------------------------------------------------------------------------------------------------------------------------------------------------------------------------------------------------------------------|----------|----------|----------|----------|---|---|------|----------|--|--|--|--|-----|----------|----------|--|--|--|------|----------|----------|----------|--|--|------|----------|----------|----------|----------|--|------|----------|----------|----------|----------|----------|------|----------|----------|----------|----------|----------|-----|----------|----------|----------|----------|----------|------|----------|----------|----------|----------|----------|------|----------|----------|----------|----------|----------|--|---|---|---|---|--|------|----------|--|--|--|--|-----|----------|----------|--|--|--|------|----------|----------|----------|--|--|------|----------|----------|----------|----------|--|
|                                                                                                                                | 1                                                                                                                                                                                                                                                                                                                                                                                                                                                                                                                                                                                                                                                                                                                                                                                                                                                                                                                                                                                                                                                                                                                                                                                                                                                                                                                                                                                                                                                                                                       | 2        | 3        | 4        | 5        |   |   |      |          |  |  |  |  |     |          |          |  |  |  |      |          |          |          |  |  |      |          |          |          |          |  |      |          |          |          |          |          |      |          |          |          |          |          |     |          |          |          |          |          |      |          |          |          |          |          |      |          |          |          |          |          |  |   |   |   |   |  |      |          |  |  |  |  |     |          |          |  |  |  |      |          |          |          |  |  |      |          |          |          |          |  |
| 1 Re                                                                                                                           | 0.000000                                                                                                                                                                                                                                                                                                                                                                                                                                                                                                                                                                                                                                                                                                                                                                                                                                                                                                                                                                                                                                                                                                                                                                                                                                                                                                                                                                                                                                                                                                |          |          |          |          |   |   |      |          |  |  |  |  |     |          |          |  |  |  |      |          |          |          |  |  |      |          |          |          |          |  |      |          |          |          |          |          |      |          |          |          |          |          |     |          |          |          |          |          |      |          |          |          |          |          |      |          |          |          |          |          |  |   |   |   |   |  |      |          |  |  |  |  |     |          |          |  |  |  |      |          |          |          |  |  |      |          |          |          |          |  |
| 2 B                                                                                                                            | 2.175175                                                                                                                                                                                                                                                                                                                                                                                                                                                                                                                                                                                                                                                                                                                                                                                                                                                                                                                                                                                                                                                                                                                                                                                                                                                                                                                                                                                                                                                                                                | 0.000000 |          |          |          |   |   |      |          |  |  |  |  |     |          |          |  |  |  |      |          |          |          |  |  |      |          |          |          |          |  |      |          |          |          |          |          |      |          |          |          |          |          |     |          |          |          |          |          |      |          |          |          |          |          |      |          |          |          |          |          |  |   |   |   |   |  |      |          |  |  |  |  |     |          |          |  |  |  |      |          |          |          |  |  |      |          |          |          |          |  |
| 3 Re                                                                                                                           | 2.805520                                                                                                                                                                                                                                                                                                                                                                                                                                                                                                                                                                                                                                                                                                                                                                                                                                                                                                                                                                                                                                                                                                                                                                                                                                                                                                                                                                                                                                                                                                | 3.081262 | 0.000000 |          |          |   |   |      |          |  |  |  |  |     |          |          |  |  |  |      |          |          |          |  |  |      |          |          |          |          |  |      |          |          |          |          |          |      |          |          |          |          |          |     |          |          |          |          |          |      |          |          |          |          |          |      |          |          |          |          |          |  |   |   |   |   |  |      |          |  |  |  |  |     |          |          |  |  |  |      |          |          |          |  |  |      |          |          |          |          |  |
| 4 B                                                                                                                            | 3.072599                                                                                                                                                                                                                                                                                                                                                                                                                                                                                                                                                                                                                                                                                                                                                                                                                                                                                                                                                                                                                                                                                                                                                                                                                                                                                                                                                                                                                                                                                                | 1.682294 | 2.183010 | 0.000000 |          |   |   |      |          |  |  |  |  |     |          |          |  |  |  |      |          |          |          |  |  |      |          |          |          |          |  |      |          |          |          |          |          |      |          |          |          |          |          |     |          |          |          |          |          |      |          |          |          |          |          |      |          |          |          |          |          |  |   |   |   |   |  |      |          |  |  |  |  |     |          |          |  |  |  |      |          |          |          |  |  |      |          |          |          |          |  |
| 5 B                                                                                                                            | 2.295363                                                                                                                                                                                                                                                                                                                                                                                                                                                                                                                                                                                                                                                                                                                                                                                                                                                                                                                                                                                                                                                                                                                                                                                                                                                                                                                                                                                                                                                                                                | 1.754350 | 2.298576 | 1.730794 | 0.000000 |   |   |      |          |  |  |  |  |     |          |          |  |  |  |      |          |          |          |  |  |      |          |          |          |          |  |      |          |          |          |          |          |      |          |          |          |          |          |     |          |          |          |          |          |      |          |          |          |          |          |      |          |          |          |          |          |  |   |   |   |   |  |      |          |  |  |  |  |     |          |          |  |  |  |      |          |          |          |  |  |      |          |          |          |          |  |
| 6 B                                                                                                                            | 2.271090                                                                                                                                                                                                                                                                                                                                                                                                                                                                                                                                                                                                                                                                                                                                                                                                                                                                                                                                                                                                                                                                                                                                                                                                                                                                                                                                                                                                                                                                                                | 1.752261 | 2.269025 | 1.765299 | 2.568554 |   |   |      |          |  |  |  |  |     |          |          |  |  |  |      |          |          |          |  |  |      |          |          |          |          |  |      |          |          |          |          |          |      |          |          |          |          |          |     |          |          |          |          |          |      |          |          |          |          |          |      |          |          |          |          |          |  |   |   |   |   |  |      |          |  |  |  |  |     |          |          |  |  |  |      |          |          |          |  |  |      |          |          |          |          |  |
| 7 B                                                                                                                            | 2.140871                                                                                                                                                                                                                                                                                                                                                                                                                                                                                                                                                                                                                                                                                                                                                                                                                                                                                                                                                                                                                                                                                                                                                                                                                                                                                                                                                                                                                                                                                                | 3.168903 | 2.138550 | 3.180374 | 3.353790 |   |   |      |          |  |  |  |  |     |          |          |  |  |  |      |          |          |          |  |  |      |          |          |          |          |  |      |          |          |          |          |          |      |          |          |          |          |          |     |          |          |          |          |          |      |          |          |          |          |          |      |          |          |          |          |          |  |   |   |   |   |  |      |          |  |  |  |  |     |          |          |  |  |  |      |          |          |          |  |  |      |          |          |          |          |  |
| 8 Re                                                                                                                           | 2.552917                                                                                                                                                                                                                                                                                                                                                                                                                                                                                                                                                                                                                                                                                                                                                                                                                                                                                                                                                                                                                                                                                                                                                                                                                                                                                                                                                                                                                                                                                                | 3.759429 | 2.765236 | 3.833609 | 2.398658 |   |   |      |          |  |  |  |  |     |          |          |  |  |  |      |          |          |          |  |  |      |          |          |          |          |  |      |          |          |          |          |          |      |          |          |          |          |          |     |          |          |          |          |          |      |          |          |          |          |          |      |          |          |          |          |          |  |   |   |   |   |  |      |          |  |  |  |  |     |          |          |  |  |  |      |          |          |          |  |  |      |          |          |          |          |  |
| 9 B                                                                                                                            | 2.200984                                                                                                                                                                                                                                                                                                                                                                                                                                                                                                                                                                                                                                                                                                                                                                                                                                                                                                                                                                                                                                                                                                                                                                                                                                                                                                                                                                                                                                                                                                | 3.892955 | 2.201371 | 3.893852 | 3.262626 |   |   |      |          |  |  |  |  |     |          |          |  |  |  |      |          |          |          |  |  |      |          |          |          |          |  |      |          |          |          |          |          |      |          |          |          |          |          |     |          |          |          |          |          |      |          |          |          |          |          |      |          |          |          |          |          |  |   |   |   |   |  |      |          |  |  |  |  |     |          |          |  |  |  |      |          |          |          |  |  |      |          |          |          |          |  |
|                                                                                                                                | 6                                                                                                                                                                                                                                                                                                                                                                                                                                                                                                                                                                                                                                                                                                                                                                                                                                                                                                                                                                                                                                                                                                                                                                                                                                                                                                                                                                                                                                                                                                       | 7        | 8        | 9        |          |   |   |      |          |  |  |  |  |     |          |          |  |  |  |      |          |          |          |  |  |      |          |          |          |          |  |      |          |          |          |          |          |      |          |          |          |          |          |     |          |          |          |          |          |      |          |          |          |          |          |      |          |          |          |          |          |  |   |   |   |   |  |      |          |  |  |  |  |     |          |          |  |  |  |      |          |          |          |  |  |      |          |          |          |          |  |
| 6 B                                                                                                                            | 0.000000                                                                                                                                                                                                                                                                                                                                                                                                                                                                                                                                                                                                                                                                                                                                                                                                                                                                                                                                                                                                                                                                                                                                                                                                                                                                                                                                                                                                                                                                                                |          |          |          |          |   |   |      |          |  |  |  |  |     |          |          |  |  |  |      |          |          |          |  |  |      |          |          |          |          |  |      |          |          |          |          |          |      |          |          |          |          |          |     |          |          |          |          |          |      |          |          |          |          |          |      |          |          |          |          |          |  |   |   |   |   |  |      |          |  |  |  |  |     |          |          |  |  |  |      |          |          |          |  |  |      |          |          |          |          |  |
| 7 B                                                                                                                            | 1.810937                                                                                                                                                                                                                                                                                                                                                                                                                                                                                                                                                                                                                                                                                                                                                                                                                                                                                                                                                                                                                                                                                                                                                                                                                                                                                                                                                                                                                                                                                                | 0.000000 |          |          |          |   |   |      |          |  |  |  |  |     |          |          |  |  |  |      |          |          |          |  |  |      |          |          |          |          |  |      |          |          |          |          |          |      |          |          |          |          |          |     |          |          |          |          |          |      |          |          |          |          |          |      |          |          |          |          |          |  |   |   |   |   |  |      |          |  |  |  |  |     |          |          |  |  |  |      |          |          |          |  |  |      |          |          |          |          |  |
| 8 Re                                                                                                                           | 3.992922                                                                                                                                                                                                                                                                                                                                                                                                                                                                                                                                                                                                                                                                                                                                                                                                                                                                                                                                                                                                                                                                                                                                                                                                                                                                                                                                                                                                                                                                                                | 3.574627 | 0.000000 |          |          |   |   |      |          |  |  |  |  |     |          |          |  |  |  |      |          |          |          |  |  |      |          |          |          |          |  |      |          |          |          |          |          |      |          |          |          |          |          |     |          |          |          |          |          |      |          |          |          |          |          |      |          |          |          |          |          |  |   |   |   |   |  |      |          |  |  |  |  |     |          |          |  |  |  |      |          |          |          |  |  |      |          |          |          |          |  |
| 9 B                                                                                                                            | 3.190321                                                                                                                                                                                                                                                                                                                                                                                                                                                                                                                                                                                                                                                                                                                                                                                                                                                                                                                                                                                                                                                                                                                                                                                                                                                                                                                                                                                                                                                                                                | 1.869666 | 2.189685 | 0.000000 |          |   |   |      |          |  |  |  |  |     |          |          |  |  |  |      |          |          |          |  |  |      |          |          |          |          |  |      |          |          |          |          |          |      |          |          |          |          |          |     |          |          |          |          |          |      |          |          |          |          |          |      |          |          |          |          |          |  |   |   |   |   |  |      |          |  |  |  |  |     |          |          |  |  |  |      |          |          |          |  |  |      |          |          |          |          |  |
|  <p>5. -968.3967519 +18.0 C<sub>2v</sub></p> | <table border="1"> <thead> <tr> <th></th> <th>1</th> <th>2</th> <th>3</th> <th>4</th> <th>5</th> </tr> </thead> <tbody> <tr><td>1 Re</td><td>0.000000</td><td></td><td></td><td></td><td></td></tr> <tr><td>2 B</td><td>2.164571</td><td>0.000000</td><td></td><td></td><td></td></tr> <tr><td>3 Re</td><td>2.789109</td><td>3.056132</td><td>0.000000</td><td></td><td></td></tr> <tr><td>4 B</td><td>3.056013</td><td>1.668645</td><td>2.164654</td><td>0.000000</td><td></td></tr> <tr><td>5 B</td><td>2.264768</td><td>1.761553</td><td>2.264419</td><td>1.761574</td><td>0.000000</td></tr> <tr><td>6 B</td><td>2.261401</td><td>1.761226</td><td>2.262031</td><td>1.761269</td><td>2.580611</td></tr> <tr><td>7 B</td><td>2.212391</td><td>3.240527</td><td>2.212061</td><td>3.240122</td><td>3.428827</td></tr> <tr><td>8 B</td><td>2.226600</td><td>3.245652</td><td>2.226622</td><td>3.245890</td><td>1.849943</td></tr> <tr><td>9 Re</td><td>2.553717</td><td>4.311395</td><td>2.553455</td><td>4.311302</td><td>3.595369</td></tr> <tr> <th></th> <th>6</th> <th>7</th> <th>8</th> <th>9</th> <th></th> </tr> <tr><td>6 B</td><td>0.000000</td><td></td><td></td><td></td><td></td></tr> <tr><td>7 B</td><td>1.850293</td><td>0.000000</td><td></td><td></td><td></td></tr> <tr><td>8 B</td><td>3.440517</td><td>3.244998</td><td>0.000000</td><td></td><td></td></tr> <tr><td>9 Re</td><td>3.619378</td><td>2.260392</td><td>2.225510</td><td>0.000000</td><td></td></tr> </tbody> </table> |          | 1        | 2        | 3        | 4 | 5 | 1 Re | 0.000000 |  |  |  |  | 2 B | 2.164571 | 0.000000 |  |  |  | 3 Re | 2.789109 | 3.056132 | 0.000000 |  |  | 4 B  | 3.056013 | 1.668645 | 2.164654 | 0.000000 |  | 5 B  | 2.264768 | 1.761553 | 2.264419 | 1.761574 | 0.000000 | 6 B  | 2.261401 | 1.761226 | 2.262031 | 1.761269 | 2.580611 | 7 B | 2.212391 | 3.240527 | 2.212061 | 3.240122 | 3.428827 | 8 B  | 2.226600 | 3.245652 | 2.226622 | 3.245890 | 1.849943 | 9 Re | 2.553717 | 4.311395 | 2.553455 | 4.311302 | 3.595369 |  | 6 | 7 | 8 | 9 |  | 6 B  | 0.000000 |  |  |  |  | 7 B | 1.850293 | 0.000000 |  |  |  | 8 B  | 3.440517 | 3.244998 | 0.000000 |  |  | 9 Re | 3.619378 | 2.260392 | 2.225510 | 0.000000 |  |
|                                                                                                                                | 1                                                                                                                                                                                                                                                                                                                                                                                                                                                                                                                                                                                                                                                                                                                                                                                                                                                                                                                                                                                                                                                                                                                                                                                                                                                                                                                                                                                                                                                                                                       | 2        | 3        | 4        | 5        |   |   |      |          |  |  |  |  |     |          |          |  |  |  |      |          |          |          |  |  |      |          |          |          |          |  |      |          |          |          |          |          |      |          |          |          |          |          |     |          |          |          |          |          |      |          |          |          |          |          |      |          |          |          |          |          |  |   |   |   |   |  |      |          |  |  |  |  |     |          |          |  |  |  |      |          |          |          |  |  |      |          |          |          |          |  |
| 1 Re                                                                                                                           | 0.000000                                                                                                                                                                                                                                                                                                                                                                                                                                                                                                                                                                                                                                                                                                                                                                                                                                                                                                                                                                                                                                                                                                                                                                                                                                                                                                                                                                                                                                                                                                |          |          |          |          |   |   |      |          |  |  |  |  |     |          |          |  |  |  |      |          |          |          |  |  |      |          |          |          |          |  |      |          |          |          |          |          |      |          |          |          |          |          |     |          |          |          |          |          |      |          |          |          |          |          |      |          |          |          |          |          |  |   |   |   |   |  |      |          |  |  |  |  |     |          |          |  |  |  |      |          |          |          |  |  |      |          |          |          |          |  |
| 2 B                                                                                                                            | 2.164571                                                                                                                                                                                                                                                                                                                                                                                                                                                                                                                                                                                                                                                                                                                                                                                                                                                                                                                                                                                                                                                                                                                                                                                                                                                                                                                                                                                                                                                                                                | 0.000000 |          |          |          |   |   |      |          |  |  |  |  |     |          |          |  |  |  |      |          |          |          |  |  |      |          |          |          |          |  |      |          |          |          |          |          |      |          |          |          |          |          |     |          |          |          |          |          |      |          |          |          |          |          |      |          |          |          |          |          |  |   |   |   |   |  |      |          |  |  |  |  |     |          |          |  |  |  |      |          |          |          |  |  |      |          |          |          |          |  |
| 3 Re                                                                                                                           | 2.789109                                                                                                                                                                                                                                                                                                                                                                                                                                                                                                                                                                                                                                                                                                                                                                                                                                                                                                                                                                                                                                                                                                                                                                                                                                                                                                                                                                                                                                                                                                | 3.056132 | 0.000000 |          |          |   |   |      |          |  |  |  |  |     |          |          |  |  |  |      |          |          |          |  |  |      |          |          |          |          |  |      |          |          |          |          |          |      |          |          |          |          |          |     |          |          |          |          |          |      |          |          |          |          |          |      |          |          |          |          |          |  |   |   |   |   |  |      |          |  |  |  |  |     |          |          |  |  |  |      |          |          |          |  |  |      |          |          |          |          |  |
| 4 B                                                                                                                            | 3.056013                                                                                                                                                                                                                                                                                                                                                                                                                                                                                                                                                                                                                                                                                                                                                                                                                                                                                                                                                                                                                                                                                                                                                                                                                                                                                                                                                                                                                                                                                                | 1.668645 | 2.164654 | 0.000000 |          |   |   |      |          |  |  |  |  |     |          |          |  |  |  |      |          |          |          |  |  |      |          |          |          |          |  |      |          |          |          |          |          |      |          |          |          |          |          |     |          |          |          |          |          |      |          |          |          |          |          |      |          |          |          |          |          |  |   |   |   |   |  |      |          |  |  |  |  |     |          |          |  |  |  |      |          |          |          |  |  |      |          |          |          |          |  |
| 5 B                                                                                                                            | 2.264768                                                                                                                                                                                                                                                                                                                                                                                                                                                                                                                                                                                                                                                                                                                                                                                                                                                                                                                                                                                                                                                                                                                                                                                                                                                                                                                                                                                                                                                                                                | 1.761553 | 2.264419 | 1.761574 | 0.000000 |   |   |      |          |  |  |  |  |     |          |          |  |  |  |      |          |          |          |  |  |      |          |          |          |          |  |      |          |          |          |          |          |      |          |          |          |          |          |     |          |          |          |          |          |      |          |          |          |          |          |      |          |          |          |          |          |  |   |   |   |   |  |      |          |  |  |  |  |     |          |          |  |  |  |      |          |          |          |  |  |      |          |          |          |          |  |
| 6 B                                                                                                                            | 2.261401                                                                                                                                                                                                                                                                                                                                                                                                                                                                                                                                                                                                                                                                                                                                                                                                                                                                                                                                                                                                                                                                                                                                                                                                                                                                                                                                                                                                                                                                                                | 1.761226 | 2.262031 | 1.761269 | 2.580611 |   |   |      |          |  |  |  |  |     |          |          |  |  |  |      |          |          |          |  |  |      |          |          |          |          |  |      |          |          |          |          |          |      |          |          |          |          |          |     |          |          |          |          |          |      |          |          |          |          |          |      |          |          |          |          |          |  |   |   |   |   |  |      |          |  |  |  |  |     |          |          |  |  |  |      |          |          |          |  |  |      |          |          |          |          |  |
| 7 B                                                                                                                            | 2.212391                                                                                                                                                                                                                                                                                                                                                                                                                                                                                                                                                                                                                                                                                                                                                                                                                                                                                                                                                                                                                                                                                                                                                                                                                                                                                                                                                                                                                                                                                                | 3.240527 | 2.212061 | 3.240122 | 3.428827 |   |   |      |          |  |  |  |  |     |          |          |  |  |  |      |          |          |          |  |  |      |          |          |          |          |  |      |          |          |          |          |          |      |          |          |          |          |          |     |          |          |          |          |          |      |          |          |          |          |          |      |          |          |          |          |          |  |   |   |   |   |  |      |          |  |  |  |  |     |          |          |  |  |  |      |          |          |          |  |  |      |          |          |          |          |  |
| 8 B                                                                                                                            | 2.226600                                                                                                                                                                                                                                                                                                                                                                                                                                                                                                                                                                                                                                                                                                                                                                                                                                                                                                                                                                                                                                                                                                                                                                                                                                                                                                                                                                                                                                                                                                | 3.245652 | 2.226622 | 3.245890 | 1.849943 |   |   |      |          |  |  |  |  |     |          |          |  |  |  |      |          |          |          |  |  |      |          |          |          |          |  |      |          |          |          |          |          |      |          |          |          |          |          |     |          |          |          |          |          |      |          |          |          |          |          |      |          |          |          |          |          |  |   |   |   |   |  |      |          |  |  |  |  |     |          |          |  |  |  |      |          |          |          |  |  |      |          |          |          |          |  |
| 9 Re                                                                                                                           | 2.553717                                                                                                                                                                                                                                                                                                                                                                                                                                                                                                                                                                                                                                                                                                                                                                                                                                                                                                                                                                                                                                                                                                                                                                                                                                                                                                                                                                                                                                                                                                | 4.311395 | 2.553455 | 4.311302 | 3.595369 |   |   |      |          |  |  |  |  |     |          |          |  |  |  |      |          |          |          |  |  |      |          |          |          |          |  |      |          |          |          |          |          |      |          |          |          |          |          |     |          |          |          |          |          |      |          |          |          |          |          |      |          |          |          |          |          |  |   |   |   |   |  |      |          |  |  |  |  |     |          |          |  |  |  |      |          |          |          |  |  |      |          |          |          |          |  |
|                                                                                                                                | 6                                                                                                                                                                                                                                                                                                                                                                                                                                                                                                                                                                                                                                                                                                                                                                                                                                                                                                                                                                                                                                                                                                                                                                                                                                                                                                                                                                                                                                                                                                       | 7        | 8        | 9        |          |   |   |      |          |  |  |  |  |     |          |          |  |  |  |      |          |          |          |  |  |      |          |          |          |          |  |      |          |          |          |          |          |      |          |          |          |          |          |     |          |          |          |          |          |      |          |          |          |          |          |      |          |          |          |          |          |  |   |   |   |   |  |      |          |  |  |  |  |     |          |          |  |  |  |      |          |          |          |  |  |      |          |          |          |          |  |
| 6 B                                                                                                                            | 0.000000                                                                                                                                                                                                                                                                                                                                                                                                                                                                                                                                                                                                                                                                                                                                                                                                                                                                                                                                                                                                                                                                                                                                                                                                                                                                                                                                                                                                                                                                                                |          |          |          |          |   |   |      |          |  |  |  |  |     |          |          |  |  |  |      |          |          |          |  |  |      |          |          |          |          |  |      |          |          |          |          |          |      |          |          |          |          |          |     |          |          |          |          |          |      |          |          |          |          |          |      |          |          |          |          |          |  |   |   |   |   |  |      |          |  |  |  |  |     |          |          |  |  |  |      |          |          |          |  |  |      |          |          |          |          |  |
| 7 B                                                                                                                            | 1.850293                                                                                                                                                                                                                                                                                                                                                                                                                                                                                                                                                                                                                                                                                                                                                                                                                                                                                                                                                                                                                                                                                                                                                                                                                                                                                                                                                                                                                                                                                                | 0.000000 |          |          |          |   |   |      |          |  |  |  |  |     |          |          |  |  |  |      |          |          |          |  |  |      |          |          |          |          |  |      |          |          |          |          |          |      |          |          |          |          |          |     |          |          |          |          |          |      |          |          |          |          |          |      |          |          |          |          |          |  |   |   |   |   |  |      |          |  |  |  |  |     |          |          |  |  |  |      |          |          |          |  |  |      |          |          |          |          |  |
| 8 B                                                                                                                            | 3.440517                                                                                                                                                                                                                                                                                                                                                                                                                                                                                                                                                                                                                                                                                                                                                                                                                                                                                                                                                                                                                                                                                                                                                                                                                                                                                                                                                                                                                                                                                                | 3.244998 | 0.000000 |          |          |   |   |      |          |  |  |  |  |     |          |          |  |  |  |      |          |          |          |  |  |      |          |          |          |          |  |      |          |          |          |          |          |      |          |          |          |          |          |     |          |          |          |          |          |      |          |          |          |          |          |      |          |          |          |          |          |  |   |   |   |   |  |      |          |  |  |  |  |     |          |          |  |  |  |      |          |          |          |  |  |      |          |          |          |          |  |
| 9 Re                                                                                                                           | 3.619378                                                                                                                                                                                                                                                                                                                                                                                                                                                                                                                                                                                                                                                                                                                                                                                                                                                                                                                                                                                                                                                                                                                                                                                                                                                                                                                                                                                                                                                                                                | 2.260392 | 2.225510 | 0.000000 |          |   |   |      |          |  |  |  |  |     |          |          |  |  |  |      |          |          |          |  |  |      |          |          |          |          |  |      |          |          |          |          |          |      |          |          |          |          |          |     |          |          |          |          |          |      |          |          |          |          |          |      |          |          |          |          |          |  |   |   |   |   |  |      |          |  |  |  |  |     |          |          |  |  |  |      |          |          |          |  |  |      |          |          |          |          |  |
|  <p>6. -968.3919120 +21.0 C<sub>s</sub></p> | <table border="1"> <thead> <tr> <th></th> <th>1</th> <th>2</th> <th>3</th> <th>4</th> <th>5</th> </tr> </thead> <tbody> <tr><td>1 B</td><td>0.000000</td><td></td><td></td><td></td><td></td></tr> <tr><td>2 B</td><td>1.790858</td><td>0.000000</td><td></td><td></td><td></td></tr> <tr><td>3 B</td><td>1.769742</td><td>1.769889</td><td>0.000000</td><td></td><td></td></tr> <tr><td>4 Re</td><td>2.329648</td><td>3.232326</td><td>3.179327</td><td>0.000000</td><td></td></tr> <tr><td>5 Re</td><td>3.232658</td><td>2.329646</td><td>3.179883</td><td>2.804101</td><td>0.000000</td></tr> <tr><td>6 Re</td><td>3.094647</td><td>3.094741</td><td>2.367143</td><td>2.454060</td><td>2.455041</td></tr> <tr><td>7 B</td><td>1.756005</td><td>2.935609</td><td>1.762295</td><td>2.155477</td><td>3.648894</td></tr> <tr><td>8 B</td><td>1.779369</td><td>1.779226</td><td>2.899570</td><td>2.174412</td><td>2.174251</td></tr> <tr><td>9 B</td><td>2.935462</td><td>1.755986</td><td>1.762465</td><td>3.647951</td><td>2.155515</td></tr> <tr> <th></th> <th>6</th> <th>7</th> <th>8</th> <th>9</th> <th></th> </tr> <tr><td>6 Re</td><td>0.000000</td><td></td><td></td><td></td><td></td></tr> <tr><td>7 B</td><td>2.199493</td><td>0.000000</td><td></td><td></td><td></td></tr> <tr><td>8 B</td><td>3.331481</td><td>3.039787</td><td>0.000000</td><td></td><td></td></tr> <tr><td>9 B</td><td>2.199422</td><td>3.090054</td><td>3.039474</td><td>0.000000</td><td></td></tr> </tbody> </table> |          | 1        | 2        | 3        | 4 | 5 | 1 B  | 0.000000 |  |  |  |  | 2 B | 1.790858 | 0.000000 |  |  |  | 3 B  | 1.769742 | 1.769889 | 0.000000 |  |  | 4 Re | 2.329648 | 3.232326 | 3.179327 | 0.000000 |  | 5 Re | 3.232658 | 2.329646 | 3.179883 | 2.804101 | 0.000000 | 6 Re | 3.094647 | 3.094741 | 2.367143 | 2.454060 | 2.455041 | 7 B | 1.756005 | 2.935609 | 1.762295 | 2.155477 | 3.648894 | 8 B  | 1.779369 | 1.779226 | 2.899570 | 2.174412 | 2.174251 | 9 B  | 2.935462 | 1.755986 | 1.762465 | 3.647951 | 2.155515 |  | 6 | 7 | 8 | 9 |  | 6 Re | 0.000000 |  |  |  |  | 7 B | 2.199493 | 0.000000 |  |  |  | 8 B  | 3.331481 | 3.039787 | 0.000000 |  |  | 9 B  | 2.199422 | 3.090054 | 3.039474 | 0.000000 |  |
|                                                                                                                                | 1                                                                                                                                                                                                                                                                                                                                                                                                                                                                                                                                                                                                                                                                                                                                                                                                                                                                                                                                                                                                                                                                                                                                                                                                                                                                                                                                                                                                                                                                                                       | 2        | 3        | 4        | 5        |   |   |      |          |  |  |  |  |     |          |          |  |  |  |      |          |          |          |  |  |      |          |          |          |          |  |      |          |          |          |          |          |      |          |          |          |          |          |     |          |          |          |          |          |      |          |          |          |          |          |      |          |          |          |          |          |  |   |   |   |   |  |      |          |  |  |  |  |     |          |          |  |  |  |      |          |          |          |  |  |      |          |          |          |          |  |
| 1 B                                                                                                                            | 0.000000                                                                                                                                                                                                                                                                                                                                                                                                                                                                                                                                                                                                                                                                                                                                                                                                                                                                                                                                                                                                                                                                                                                                                                                                                                                                                                                                                                                                                                                                                                |          |          |          |          |   |   |      |          |  |  |  |  |     |          |          |  |  |  |      |          |          |          |  |  |      |          |          |          |          |  |      |          |          |          |          |          |      |          |          |          |          |          |     |          |          |          |          |          |      |          |          |          |          |          |      |          |          |          |          |          |  |   |   |   |   |  |      |          |  |  |  |  |     |          |          |  |  |  |      |          |          |          |  |  |      |          |          |          |          |  |
| 2 B                                                                                                                            | 1.790858                                                                                                                                                                                                                                                                                                                                                                                                                                                                                                                                                                                                                                                                                                                                                                                                                                                                                                                                                                                                                                                                                                                                                                                                                                                                                                                                                                                                                                                                                                | 0.000000 |          |          |          |   |   |      |          |  |  |  |  |     |          |          |  |  |  |      |          |          |          |  |  |      |          |          |          |          |  |      |          |          |          |          |          |      |          |          |          |          |          |     |          |          |          |          |          |      |          |          |          |          |          |      |          |          |          |          |          |  |   |   |   |   |  |      |          |  |  |  |  |     |          |          |  |  |  |      |          |          |          |  |  |      |          |          |          |          |  |
| 3 B                                                                                                                            | 1.769742                                                                                                                                                                                                                                                                                                                                                                                                                                                                                                                                                                                                                                                                                                                                                                                                                                                                                                                                                                                                                                                                                                                                                                                                                                                                                                                                                                                                                                                                                                | 1.769889 | 0.000000 |          |          |   |   |      |          |  |  |  |  |     |          |          |  |  |  |      |          |          |          |  |  |      |          |          |          |          |  |      |          |          |          |          |          |      |          |          |          |          |          |     |          |          |          |          |          |      |          |          |          |          |          |      |          |          |          |          |          |  |   |   |   |   |  |      |          |  |  |  |  |     |          |          |  |  |  |      |          |          |          |  |  |      |          |          |          |          |  |
| 4 Re                                                                                                                           | 2.329648                                                                                                                                                                                                                                                                                                                                                                                                                                                                                                                                                                                                                                                                                                                                                                                                                                                                                                                                                                                                                                                                                                                                                                                                                                                                                                                                                                                                                                                                                                | 3.232326 | 3.179327 | 0.000000 |          |   |   |      |          |  |  |  |  |     |          |          |  |  |  |      |          |          |          |  |  |      |          |          |          |          |  |      |          |          |          |          |          |      |          |          |          |          |          |     |          |          |          |          |          |      |          |          |          |          |          |      |          |          |          |          |          |  |   |   |   |   |  |      |          |  |  |  |  |     |          |          |  |  |  |      |          |          |          |  |  |      |          |          |          |          |  |
| 5 Re                                                                                                                           | 3.232658                                                                                                                                                                                                                                                                                                                                                                                                                                                                                                                                                                                                                                                                                                                                                                                                                                                                                                                                                                                                                                                                                                                                                                                                                                                                                                                                                                                                                                                                                                | 2.329646 | 3.179883 | 2.804101 | 0.000000 |   |   |      |          |  |  |  |  |     |          |          |  |  |  |      |          |          |          |  |  |      |          |          |          |          |  |      |          |          |          |          |          |      |          |          |          |          |          |     |          |          |          |          |          |      |          |          |          |          |          |      |          |          |          |          |          |  |   |   |   |   |  |      |          |  |  |  |  |     |          |          |  |  |  |      |          |          |          |  |  |      |          |          |          |          |  |
| 6 Re                                                                                                                           | 3.094647                                                                                                                                                                                                                                                                                                                                                                                                                                                                                                                                                                                                                                                                                                                                                                                                                                                                                                                                                                                                                                                                                                                                                                                                                                                                                                                                                                                                                                                                                                | 3.094741 | 2.367143 | 2.454060 | 2.455041 |   |   |      |          |  |  |  |  |     |          |          |  |  |  |      |          |          |          |  |  |      |          |          |          |          |  |      |          |          |          |          |          |      |          |          |          |          |          |     |          |          |          |          |          |      |          |          |          |          |          |      |          |          |          |          |          |  |   |   |   |   |  |      |          |  |  |  |  |     |          |          |  |  |  |      |          |          |          |  |  |      |          |          |          |          |  |
| 7 B                                                                                                                            | 1.756005                                                                                                                                                                                                                                                                                                                                                                                                                                                                                                                                                                                                                                                                                                                                                                                                                                                                                                                                                                                                                                                                                                                                                                                                                                                                                                                                                                                                                                                                                                | 2.935609 | 1.762295 | 2.155477 | 3.648894 |   |   |      |          |  |  |  |  |     |          |          |  |  |  |      |          |          |          |  |  |      |          |          |          |          |  |      |          |          |          |          |          |      |          |          |          |          |          |     |          |          |          |          |          |      |          |          |          |          |          |      |          |          |          |          |          |  |   |   |   |   |  |      |          |  |  |  |  |     |          |          |  |  |  |      |          |          |          |  |  |      |          |          |          |          |  |
| 8 B                                                                                                                            | 1.779369                                                                                                                                                                                                                                                                                                                                                                                                                                                                                                                                                                                                                                                                                                                                                                                                                                                                                                                                                                                                                                                                                                                                                                                                                                                                                                                                                                                                                                                                                                | 1.779226 | 2.899570 | 2.174412 | 2.174251 |   |   |      |          |  |  |  |  |     |          |          |  |  |  |      |          |          |          |  |  |      |          |          |          |          |  |      |          |          |          |          |          |      |          |          |          |          |          |     |          |          |          |          |          |      |          |          |          |          |          |      |          |          |          |          |          |  |   |   |   |   |  |      |          |  |  |  |  |     |          |          |  |  |  |      |          |          |          |  |  |      |          |          |          |          |  |
| 9 B                                                                                                                            | 2.935462                                                                                                                                                                                                                                                                                                                                                                                                                                                                                                                                                                                                                                                                                                                                                                                                                                                                                                                                                                                                                                                                                                                                                                                                                                                                                                                                                                                                                                                                                                | 1.755986 | 1.762465 | 3.647951 | 2.155515 |   |   |      |          |  |  |  |  |     |          |          |  |  |  |      |          |          |          |  |  |      |          |          |          |          |  |      |          |          |          |          |          |      |          |          |          |          |          |     |          |          |          |          |          |      |          |          |          |          |          |      |          |          |          |          |          |  |   |   |   |   |  |      |          |  |  |  |  |     |          |          |  |  |  |      |          |          |          |  |  |      |          |          |          |          |  |
|                                                                                                                                | 6                                                                                                                                                                                                                                                                                                                                                                                                                                                                                                                                                                                                                                                                                                                                                                                                                                                                                                                                                                                                                                                                                                                                                                                                                                                                                                                                                                                                                                                                                                       | 7        | 8        | 9        |          |   |   |      |          |  |  |  |  |     |          |          |  |  |  |      |          |          |          |  |  |      |          |          |          |          |  |      |          |          |          |          |          |      |          |          |          |          |          |     |          |          |          |          |          |      |          |          |          |          |          |      |          |          |          |          |          |  |   |   |   |   |  |      |          |  |  |  |  |     |          |          |  |  |  |      |          |          |          |  |  |      |          |          |          |          |  |
| 6 Re                                                                                                                           | 0.000000                                                                                                                                                                                                                                                                                                                                                                                                                                                                                                                                                                                                                                                                                                                                                                                                                                                                                                                                                                                                                                                                                                                                                                                                                                                                                                                                                                                                                                                                                                |          |          |          |          |   |   |      |          |  |  |  |  |     |          |          |  |  |  |      |          |          |          |  |  |      |          |          |          |          |  |      |          |          |          |          |          |      |          |          |          |          |          |     |          |          |          |          |          |      |          |          |          |          |          |      |          |          |          |          |          |  |   |   |   |   |  |      |          |  |  |  |  |     |          |          |  |  |  |      |          |          |          |  |  |      |          |          |          |          |  |
| 7 B                                                                                                                            | 2.199493                                                                                                                                                                                                                                                                                                                                                                                                                                                                                                                                                                                                                                                                                                                                                                                                                                                                                                                                                                                                                                                                                                                                                                                                                                                                                                                                                                                                                                                                                                | 0.000000 |          |          |          |   |   |      |          |  |  |  |  |     |          |          |  |  |  |      |          |          |          |  |  |      |          |          |          |          |  |      |          |          |          |          |          |      |          |          |          |          |          |     |          |          |          |          |          |      |          |          |          |          |          |      |          |          |          |          |          |  |   |   |   |   |  |      |          |  |  |  |  |     |          |          |  |  |  |      |          |          |          |  |  |      |          |          |          |          |  |
| 8 B                                                                                                                            | 3.331481                                                                                                                                                                                                                                                                                                                                                                                                                                                                                                                                                                                                                                                                                                                                                                                                                                                                                                                                                                                                                                                                                                                                                                                                                                                                                                                                                                                                                                                                                                | 3.039787 | 0.000000 |          |          |   |   |      |          |  |  |  |  |     |          |          |  |  |  |      |          |          |          |  |  |      |          |          |          |          |  |      |          |          |          |          |          |      |          |          |          |          |          |     |          |          |          |          |          |      |          |          |          |          |          |      |          |          |          |          |          |  |   |   |   |   |  |      |          |  |  |  |  |     |          |          |  |  |  |      |          |          |          |  |  |      |          |          |          |          |  |
| 9 B                                                                                                                            | 2.199422                                                                                                                                                                                                                                                                                                                                                                                                                                                                                                                                                                                                                                                                                                                                                                                                                                                                                                                                                                                                                                                                                                                                                                                                                                                                                                                                                                                                                                                                                                | 3.090054 | 3.039474 | 0.000000 |          |   |   |      |          |  |  |  |  |     |          |          |  |  |  |      |          |          |          |  |  |      |          |          |          |          |  |      |          |          |          |          |          |      |          |          |          |          |          |     |          |          |          |          |          |      |          |          |          |          |          |      |          |          |          |          |          |  |   |   |   |   |  |      |          |  |  |  |  |     |          |          |  |  |  |      |          |          |          |  |  |      |          |          |          |          |  |

| 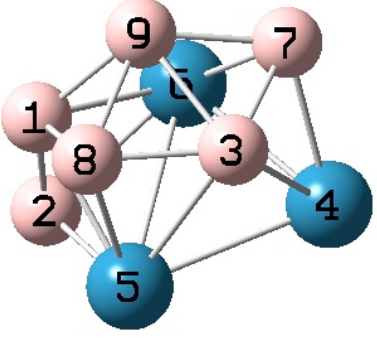 <p>7. -968.3782417 +29.6 C<sub>1</sub></p>   | <table border="1"> <thead> <tr> <th></th> <th>1</th> <th>2</th> <th>3</th> <th>4</th> <th>5</th> </tr> </thead> <tbody> <tr><td>1 B</td><td>0.000000</td><td></td><td></td><td></td><td></td></tr> <tr><td>2 B</td><td>1.780809</td><td>0.000000</td><td></td><td></td><td></td></tr> <tr><td>3 B</td><td>2.726121</td><td>3.645544</td><td>0.000000</td><td></td><td></td></tr> <tr><td>4 Re</td><td>3.598640</td><td>3.434942</td><td>2.306175</td><td>0.000000</td><td></td></tr> <tr><td>5 Re</td><td>2.256067</td><td>2.044305</td><td>2.367323</td><td>2.597347</td><td>0.000000</td></tr> <tr><td>6 Re</td><td>2.268345</td><td>2.179825</td><td>3.017265</td><td>2.406803</td><td>2.914482</td></tr> <tr><td>7 B</td><td>3.072959</td><td>3.860297</td><td>1.754035</td><td>2.131049</td><td>3.390836</td></tr> <tr><td>8 B</td><td>1.751399</td><td>3.080391</td><td>1.717218</td><td>3.541869</td><td>2.114724</td></tr> <tr><td>9 B</td><td>1.751638</td><td>3.214210</td><td>1.851446</td><td>3.238000</td><td>3.026100</td></tr> <tr> <th></th> <th>6</th> <th>7</th> <th>8</th> <th>9</th> <th></th> </tr> <tr><td>6 Re</td><td>0.000000</td><td></td><td></td><td></td><td></td></tr> <tr><td>7 B</td><td>2.223929</td><td>0.000000</td><td></td><td></td><td></td></tr> <tr><td>8 B</td><td>3.333054</td><td>2.961948</td><td>0.000000</td><td></td><td></td></tr> <tr><td>9 B</td><td>2.354113</td><td>1.763327</td><td>1.785537</td><td>0.000000</td><td></td></tr> </tbody> </table>  |          | 1        | 2        | 3        | 4 | 5 | 1 B | 0.000000 |  |  |  |  | 2 B | 1.780809 | 0.000000 |  |  |  | 3 B | 2.726121 | 3.645544 | 0.000000 |  |  | 4 Re | 3.598640 | 3.434942 | 2.306175 | 0.000000 |  | 5 Re | 2.256067 | 2.044305 | 2.367323 | 2.597347 | 0.000000 | 6 Re | 2.268345 | 2.179825 | 3.017265 | 2.406803 | 2.914482 | 7 B  | 3.072959 | 3.860297 | 1.754035 | 2.131049 | 3.390836 | 8 B  | 1.751399 | 3.080391 | 1.717218 | 3.541869 | 2.114724 | 9 B | 1.751638 | 3.214210 | 1.851446 | 3.238000 | 3.026100 |  | 6 | 7 | 8 | 9 |  | 6 Re | 0.000000 |  |  |  |  | 7 B  | 2.223929 | 0.000000 |  |  |  | 8 B  | 3.333054 | 2.961948 | 0.000000 |  |  | 9 B | 2.354113 | 1.763327 | 1.785537 | 0.000000 |  |
|--------------------------------------------------------------------------------------------------------------------------------|----------------------------------------------------------------------------------------------------------------------------------------------------------------------------------------------------------------------------------------------------------------------------------------------------------------------------------------------------------------------------------------------------------------------------------------------------------------------------------------------------------------------------------------------------------------------------------------------------------------------------------------------------------------------------------------------------------------------------------------------------------------------------------------------------------------------------------------------------------------------------------------------------------------------------------------------------------------------------------------------------------------------------------------------------------------------------------------------------------------------------------------------------------------------------------------------------------------------------------------------------------------------------------------------------------------------------------------------------------------------------------------------------------------------------------------------------------------------------------------------------------|----------|----------|----------|----------|---|---|-----|----------|--|--|--|--|-----|----------|----------|--|--|--|-----|----------|----------|----------|--|--|------|----------|----------|----------|----------|--|------|----------|----------|----------|----------|----------|------|----------|----------|----------|----------|----------|------|----------|----------|----------|----------|----------|------|----------|----------|----------|----------|----------|-----|----------|----------|----------|----------|----------|--|---|---|---|---|--|------|----------|--|--|--|--|------|----------|----------|--|--|--|------|----------|----------|----------|--|--|-----|----------|----------|----------|----------|--|
|                                                                                                                                | 1                                                                                                                                                                                                                                                                                                                                                                                                                                                                                                                                                                                                                                                                                                                                                                                                                                                                                                                                                                                                                                                                                                                                                                                                                                                                                                                                                                                                                                                                                                        | 2        | 3        | 4        | 5        |   |   |     |          |  |  |  |  |     |          |          |  |  |  |     |          |          |          |  |  |      |          |          |          |          |  |      |          |          |          |          |          |      |          |          |          |          |          |      |          |          |          |          |          |      |          |          |          |          |          |     |          |          |          |          |          |  |   |   |   |   |  |      |          |  |  |  |  |      |          |          |  |  |  |      |          |          |          |  |  |     |          |          |          |          |  |
| 1 B                                                                                                                            | 0.000000                                                                                                                                                                                                                                                                                                                                                                                                                                                                                                                                                                                                                                                                                                                                                                                                                                                                                                                                                                                                                                                                                                                                                                                                                                                                                                                                                                                                                                                                                                 |          |          |          |          |   |   |     |          |  |  |  |  |     |          |          |  |  |  |     |          |          |          |  |  |      |          |          |          |          |  |      |          |          |          |          |          |      |          |          |          |          |          |      |          |          |          |          |          |      |          |          |          |          |          |     |          |          |          |          |          |  |   |   |   |   |  |      |          |  |  |  |  |      |          |          |  |  |  |      |          |          |          |  |  |     |          |          |          |          |  |
| 2 B                                                                                                                            | 1.780809                                                                                                                                                                                                                                                                                                                                                                                                                                                                                                                                                                                                                                                                                                                                                                                                                                                                                                                                                                                                                                                                                                                                                                                                                                                                                                                                                                                                                                                                                                 | 0.000000 |          |          |          |   |   |     |          |  |  |  |  |     |          |          |  |  |  |     |          |          |          |  |  |      |          |          |          |          |  |      |          |          |          |          |          |      |          |          |          |          |          |      |          |          |          |          |          |      |          |          |          |          |          |     |          |          |          |          |          |  |   |   |   |   |  |      |          |  |  |  |  |      |          |          |  |  |  |      |          |          |          |  |  |     |          |          |          |          |  |
| 3 B                                                                                                                            | 2.726121                                                                                                                                                                                                                                                                                                                                                                                                                                                                                                                                                                                                                                                                                                                                                                                                                                                                                                                                                                                                                                                                                                                                                                                                                                                                                                                                                                                                                                                                                                 | 3.645544 | 0.000000 |          |          |   |   |     |          |  |  |  |  |     |          |          |  |  |  |     |          |          |          |  |  |      |          |          |          |          |  |      |          |          |          |          |          |      |          |          |          |          |          |      |          |          |          |          |          |      |          |          |          |          |          |     |          |          |          |          |          |  |   |   |   |   |  |      |          |  |  |  |  |      |          |          |  |  |  |      |          |          |          |  |  |     |          |          |          |          |  |
| 4 Re                                                                                                                           | 3.598640                                                                                                                                                                                                                                                                                                                                                                                                                                                                                                                                                                                                                                                                                                                                                                                                                                                                                                                                                                                                                                                                                                                                                                                                                                                                                                                                                                                                                                                                                                 | 3.434942 | 2.306175 | 0.000000 |          |   |   |     |          |  |  |  |  |     |          |          |  |  |  |     |          |          |          |  |  |      |          |          |          |          |  |      |          |          |          |          |          |      |          |          |          |          |          |      |          |          |          |          |          |      |          |          |          |          |          |     |          |          |          |          |          |  |   |   |   |   |  |      |          |  |  |  |  |      |          |          |  |  |  |      |          |          |          |  |  |     |          |          |          |          |  |
| 5 Re                                                                                                                           | 2.256067                                                                                                                                                                                                                                                                                                                                                                                                                                                                                                                                                                                                                                                                                                                                                                                                                                                                                                                                                                                                                                                                                                                                                                                                                                                                                                                                                                                                                                                                                                 | 2.044305 | 2.367323 | 2.597347 | 0.000000 |   |   |     |          |  |  |  |  |     |          |          |  |  |  |     |          |          |          |  |  |      |          |          |          |          |  |      |          |          |          |          |          |      |          |          |          |          |          |      |          |          |          |          |          |      |          |          |          |          |          |     |          |          |          |          |          |  |   |   |   |   |  |      |          |  |  |  |  |      |          |          |  |  |  |      |          |          |          |  |  |     |          |          |          |          |  |
| 6 Re                                                                                                                           | 2.268345                                                                                                                                                                                                                                                                                                                                                                                                                                                                                                                                                                                                                                                                                                                                                                                                                                                                                                                                                                                                                                                                                                                                                                                                                                                                                                                                                                                                                                                                                                 | 2.179825 | 3.017265 | 2.406803 | 2.914482 |   |   |     |          |  |  |  |  |     |          |          |  |  |  |     |          |          |          |  |  |      |          |          |          |          |  |      |          |          |          |          |          |      |          |          |          |          |          |      |          |          |          |          |          |      |          |          |          |          |          |     |          |          |          |          |          |  |   |   |   |   |  |      |          |  |  |  |  |      |          |          |  |  |  |      |          |          |          |  |  |     |          |          |          |          |  |
| 7 B                                                                                                                            | 3.072959                                                                                                                                                                                                                                                                                                                                                                                                                                                                                                                                                                                                                                                                                                                                                                                                                                                                                                                                                                                                                                                                                                                                                                                                                                                                                                                                                                                                                                                                                                 | 3.860297 | 1.754035 | 2.131049 | 3.390836 |   |   |     |          |  |  |  |  |     |          |          |  |  |  |     |          |          |          |  |  |      |          |          |          |          |  |      |          |          |          |          |          |      |          |          |          |          |          |      |          |          |          |          |          |      |          |          |          |          |          |     |          |          |          |          |          |  |   |   |   |   |  |      |          |  |  |  |  |      |          |          |  |  |  |      |          |          |          |  |  |     |          |          |          |          |  |
| 8 B                                                                                                                            | 1.751399                                                                                                                                                                                                                                                                                                                                                                                                                                                                                                                                                                                                                                                                                                                                                                                                                                                                                                                                                                                                                                                                                                                                                                                                                                                                                                                                                                                                                                                                                                 | 3.080391 | 1.717218 | 3.541869 | 2.114724 |   |   |     |          |  |  |  |  |     |          |          |  |  |  |     |          |          |          |  |  |      |          |          |          |          |  |      |          |          |          |          |          |      |          |          |          |          |          |      |          |          |          |          |          |      |          |          |          |          |          |     |          |          |          |          |          |  |   |   |   |   |  |      |          |  |  |  |  |      |          |          |  |  |  |      |          |          |          |  |  |     |          |          |          |          |  |
| 9 B                                                                                                                            | 1.751638                                                                                                                                                                                                                                                                                                                                                                                                                                                                                                                                                                                                                                                                                                                                                                                                                                                                                                                                                                                                                                                                                                                                                                                                                                                                                                                                                                                                                                                                                                 | 3.214210 | 1.851446 | 3.238000 | 3.026100 |   |   |     |          |  |  |  |  |     |          |          |  |  |  |     |          |          |          |  |  |      |          |          |          |          |  |      |          |          |          |          |          |      |          |          |          |          |          |      |          |          |          |          |          |      |          |          |          |          |          |     |          |          |          |          |          |  |   |   |   |   |  |      |          |  |  |  |  |      |          |          |  |  |  |      |          |          |          |  |  |     |          |          |          |          |  |
|                                                                                                                                | 6                                                                                                                                                                                                                                                                                                                                                                                                                                                                                                                                                                                                                                                                                                                                                                                                                                                                                                                                                                                                                                                                                                                                                                                                                                                                                                                                                                                                                                                                                                        | 7        | 8        | 9        |          |   |   |     |          |  |  |  |  |     |          |          |  |  |  |     |          |          |          |  |  |      |          |          |          |          |  |      |          |          |          |          |          |      |          |          |          |          |          |      |          |          |          |          |          |      |          |          |          |          |          |     |          |          |          |          |          |  |   |   |   |   |  |      |          |  |  |  |  |      |          |          |  |  |  |      |          |          |          |  |  |     |          |          |          |          |  |
| 6 Re                                                                                                                           | 0.000000                                                                                                                                                                                                                                                                                                                                                                                                                                                                                                                                                                                                                                                                                                                                                                                                                                                                                                                                                                                                                                                                                                                                                                                                                                                                                                                                                                                                                                                                                                 |          |          |          |          |   |   |     |          |  |  |  |  |     |          |          |  |  |  |     |          |          |          |  |  |      |          |          |          |          |  |      |          |          |          |          |          |      |          |          |          |          |          |      |          |          |          |          |          |      |          |          |          |          |          |     |          |          |          |          |          |  |   |   |   |   |  |      |          |  |  |  |  |      |          |          |  |  |  |      |          |          |          |  |  |     |          |          |          |          |  |
| 7 B                                                                                                                            | 2.223929                                                                                                                                                                                                                                                                                                                                                                                                                                                                                                                                                                                                                                                                                                                                                                                                                                                                                                                                                                                                                                                                                                                                                                                                                                                                                                                                                                                                                                                                                                 | 0.000000 |          |          |          |   |   |     |          |  |  |  |  |     |          |          |  |  |  |     |          |          |          |  |  |      |          |          |          |          |  |      |          |          |          |          |          |      |          |          |          |          |          |      |          |          |          |          |          |      |          |          |          |          |          |     |          |          |          |          |          |  |   |   |   |   |  |      |          |  |  |  |  |      |          |          |  |  |  |      |          |          |          |  |  |     |          |          |          |          |  |
| 8 B                                                                                                                            | 3.333054                                                                                                                                                                                                                                                                                                                                                                                                                                                                                                                                                                                                                                                                                                                                                                                                                                                                                                                                                                                                                                                                                                                                                                                                                                                                                                                                                                                                                                                                                                 | 2.961948 | 0.000000 |          |          |   |   |     |          |  |  |  |  |     |          |          |  |  |  |     |          |          |          |  |  |      |          |          |          |          |  |      |          |          |          |          |          |      |          |          |          |          |          |      |          |          |          |          |          |      |          |          |          |          |          |     |          |          |          |          |          |  |   |   |   |   |  |      |          |  |  |  |  |      |          |          |  |  |  |      |          |          |          |  |  |     |          |          |          |          |  |
| 9 B                                                                                                                            | 2.354113                                                                                                                                                                                                                                                                                                                                                                                                                                                                                                                                                                                                                                                                                                                                                                                                                                                                                                                                                                                                                                                                                                                                                                                                                                                                                                                                                                                                                                                                                                 | 1.763327 | 1.785537 | 0.000000 |          |   |   |     |          |  |  |  |  |     |          |          |  |  |  |     |          |          |          |  |  |      |          |          |          |          |  |      |          |          |          |          |          |      |          |          |          |          |          |      |          |          |          |          |          |      |          |          |          |          |          |     |          |          |          |          |          |  |   |   |   |   |  |      |          |  |  |  |  |      |          |          |  |  |  |      |          |          |          |  |  |     |          |          |          |          |  |
|  <p>8. -968.3715871 +33.8 C<sub>1</sub></p>  | <table border="1"> <thead> <tr> <th></th> <th>1</th> <th>2</th> <th>3</th> <th>4</th> <th>5</th> </tr> </thead> <tbody> <tr><td>1 B</td><td>0.000000</td><td></td><td></td><td></td><td></td></tr> <tr><td>2 B</td><td>1.732722</td><td>0.000000</td><td></td><td></td><td></td></tr> <tr><td>3 B</td><td>1.787490</td><td>1.894476</td><td>0.000000</td><td></td><td></td></tr> <tr><td>4 B</td><td>3.013954</td><td>3.077310</td><td>3.272893</td><td>0.000000</td><td></td></tr> <tr><td>5 Re</td><td>3.449783</td><td>2.316476</td><td>3.162107</td><td>2.178671</td><td>0.000000</td></tr> <tr><td>6 Re</td><td>3.350114</td><td>3.118247</td><td>2.291365</td><td>2.295103</td><td>2.417174</td></tr> <tr><td>7 Re</td><td>2.083629</td><td>3.152478</td><td>2.283327</td><td>2.187443</td><td>3.610228</td></tr> <tr><td>8 B</td><td>1.751992</td><td>1.782727</td><td>2.693447</td><td>1.748686</td><td>2.262169</td></tr> <tr><td>9 B</td><td>2.957160</td><td>1.758274</td><td>1.785457</td><td>3.390739</td><td>2.114753</td></tr> <tr> <th></th> <th>6</th> <th>7</th> <th>8</th> <th>9</th> <th></th> </tr> <tr><td>6 Re</td><td>0.000000</td><td></td><td></td><td></td><td></td></tr> <tr><td>7 Re</td><td>2.409194</td><td>0.000000</td><td></td><td></td><td></td></tr> <tr><td>8 B</td><td>3.051764</td><td>2.378724</td><td>0.000000</td><td></td><td></td></tr> <tr><td>9 B</td><td>2.246966</td><td>3.514071</td><td>2.960022</td><td>0.000000</td><td></td></tr> </tbody> </table> |          | 1        | 2        | 3        | 4 | 5 | 1 B | 0.000000 |  |  |  |  | 2 B | 1.732722 | 0.000000 |  |  |  | 3 B | 1.787490 | 1.894476 | 0.000000 |  |  | 4 B  | 3.013954 | 3.077310 | 3.272893 | 0.000000 |  | 5 Re | 3.449783 | 2.316476 | 3.162107 | 2.178671 | 0.000000 | 6 Re | 3.350114 | 3.118247 | 2.291365 | 2.295103 | 2.417174 | 7 Re | 2.083629 | 3.152478 | 2.283327 | 2.187443 | 3.610228 | 8 B  | 1.751992 | 1.782727 | 2.693447 | 1.748686 | 2.262169 | 9 B | 2.957160 | 1.758274 | 1.785457 | 3.390739 | 2.114753 |  | 6 | 7 | 8 | 9 |  | 6 Re | 0.000000 |  |  |  |  | 7 Re | 2.409194 | 0.000000 |  |  |  | 8 B  | 3.051764 | 2.378724 | 0.000000 |  |  | 9 B | 2.246966 | 3.514071 | 2.960022 | 0.000000 |  |
|                                                                                                                                | 1                                                                                                                                                                                                                                                                                                                                                                                                                                                                                                                                                                                                                                                                                                                                                                                                                                                                                                                                                                                                                                                                                                                                                                                                                                                                                                                                                                                                                                                                                                        | 2        | 3        | 4        | 5        |   |   |     |          |  |  |  |  |     |          |          |  |  |  |     |          |          |          |  |  |      |          |          |          |          |  |      |          |          |          |          |          |      |          |          |          |          |          |      |          |          |          |          |          |      |          |          |          |          |          |     |          |          |          |          |          |  |   |   |   |   |  |      |          |  |  |  |  |      |          |          |  |  |  |      |          |          |          |  |  |     |          |          |          |          |  |
| 1 B                                                                                                                            | 0.000000                                                                                                                                                                                                                                                                                                                                                                                                                                                                                                                                                                                                                                                                                                                                                                                                                                                                                                                                                                                                                                                                                                                                                                                                                                                                                                                                                                                                                                                                                                 |          |          |          |          |   |   |     |          |  |  |  |  |     |          |          |  |  |  |     |          |          |          |  |  |      |          |          |          |          |  |      |          |          |          |          |          |      |          |          |          |          |          |      |          |          |          |          |          |      |          |          |          |          |          |     |          |          |          |          |          |  |   |   |   |   |  |      |          |  |  |  |  |      |          |          |  |  |  |      |          |          |          |  |  |     |          |          |          |          |  |
| 2 B                                                                                                                            | 1.732722                                                                                                                                                                                                                                                                                                                                                                                                                                                                                                                                                                                                                                                                                                                                                                                                                                                                                                                                                                                                                                                                                                                                                                                                                                                                                                                                                                                                                                                                                                 | 0.000000 |          |          |          |   |   |     |          |  |  |  |  |     |          |          |  |  |  |     |          |          |          |  |  |      |          |          |          |          |  |      |          |          |          |          |          |      |          |          |          |          |          |      |          |          |          |          |          |      |          |          |          |          |          |     |          |          |          |          |          |  |   |   |   |   |  |      |          |  |  |  |  |      |          |          |  |  |  |      |          |          |          |  |  |     |          |          |          |          |  |
| 3 B                                                                                                                            | 1.787490                                                                                                                                                                                                                                                                                                                                                                                                                                                                                                                                                                                                                                                                                                                                                                                                                                                                                                                                                                                                                                                                                                                                                                                                                                                                                                                                                                                                                                                                                                 | 1.894476 | 0.000000 |          |          |   |   |     |          |  |  |  |  |     |          |          |  |  |  |     |          |          |          |  |  |      |          |          |          |          |  |      |          |          |          |          |          |      |          |          |          |          |          |      |          |          |          |          |          |      |          |          |          |          |          |     |          |          |          |          |          |  |   |   |   |   |  |      |          |  |  |  |  |      |          |          |  |  |  |      |          |          |          |  |  |     |          |          |          |          |  |
| 4 B                                                                                                                            | 3.013954                                                                                                                                                                                                                                                                                                                                                                                                                                                                                                                                                                                                                                                                                                                                                                                                                                                                                                                                                                                                                                                                                                                                                                                                                                                                                                                                                                                                                                                                                                 | 3.077310 | 3.272893 | 0.000000 |          |   |   |     |          |  |  |  |  |     |          |          |  |  |  |     |          |          |          |  |  |      |          |          |          |          |  |      |          |          |          |          |          |      |          |          |          |          |          |      |          |          |          |          |          |      |          |          |          |          |          |     |          |          |          |          |          |  |   |   |   |   |  |      |          |  |  |  |  |      |          |          |  |  |  |      |          |          |          |  |  |     |          |          |          |          |  |
| 5 Re                                                                                                                           | 3.449783                                                                                                                                                                                                                                                                                                                                                                                                                                                                                                                                                                                                                                                                                                                                                                                                                                                                                                                                                                                                                                                                                                                                                                                                                                                                                                                                                                                                                                                                                                 | 2.316476 | 3.162107 | 2.178671 | 0.000000 |   |   |     |          |  |  |  |  |     |          |          |  |  |  |     |          |          |          |  |  |      |          |          |          |          |  |      |          |          |          |          |          |      |          |          |          |          |          |      |          |          |          |          |          |      |          |          |          |          |          |     |          |          |          |          |          |  |   |   |   |   |  |      |          |  |  |  |  |      |          |          |  |  |  |      |          |          |          |  |  |     |          |          |          |          |  |
| 6 Re                                                                                                                           | 3.350114                                                                                                                                                                                                                                                                                                                                                                                                                                                                                                                                                                                                                                                                                                                                                                                                                                                                                                                                                                                                                                                                                                                                                                                                                                                                                                                                                                                                                                                                                                 | 3.118247 | 2.291365 | 2.295103 | 2.417174 |   |   |     |          |  |  |  |  |     |          |          |  |  |  |     |          |          |          |  |  |      |          |          |          |          |  |      |          |          |          |          |          |      |          |          |          |          |          |      |          |          |          |          |          |      |          |          |          |          |          |     |          |          |          |          |          |  |   |   |   |   |  |      |          |  |  |  |  |      |          |          |  |  |  |      |          |          |          |  |  |     |          |          |          |          |  |
| 7 Re                                                                                                                           | 2.083629                                                                                                                                                                                                                                                                                                                                                                                                                                                                                                                                                                                                                                                                                                                                                                                                                                                                                                                                                                                                                                                                                                                                                                                                                                                                                                                                                                                                                                                                                                 | 3.152478 | 2.283327 | 2.187443 | 3.610228 |   |   |     |          |  |  |  |  |     |          |          |  |  |  |     |          |          |          |  |  |      |          |          |          |          |  |      |          |          |          |          |          |      |          |          |          |          |          |      |          |          |          |          |          |      |          |          |          |          |          |     |          |          |          |          |          |  |   |   |   |   |  |      |          |  |  |  |  |      |          |          |  |  |  |      |          |          |          |  |  |     |          |          |          |          |  |
| 8 B                                                                                                                            | 1.751992                                                                                                                                                                                                                                                                                                                                                                                                                                                                                                                                                                                                                                                                                                                                                                                                                                                                                                                                                                                                                                                                                                                                                                                                                                                                                                                                                                                                                                                                                                 | 1.782727 | 2.693447 | 1.748686 | 2.262169 |   |   |     |          |  |  |  |  |     |          |          |  |  |  |     |          |          |          |  |  |      |          |          |          |          |  |      |          |          |          |          |          |      |          |          |          |          |          |      |          |          |          |          |          |      |          |          |          |          |          |     |          |          |          |          |          |  |   |   |   |   |  |      |          |  |  |  |  |      |          |          |  |  |  |      |          |          |          |  |  |     |          |          |          |          |  |
| 9 B                                                                                                                            | 2.957160                                                                                                                                                                                                                                                                                                                                                                                                                                                                                                                                                                                                                                                                                                                                                                                                                                                                                                                                                                                                                                                                                                                                                                                                                                                                                                                                                                                                                                                                                                 | 1.758274 | 1.785457 | 3.390739 | 2.114753 |   |   |     |          |  |  |  |  |     |          |          |  |  |  |     |          |          |          |  |  |      |          |          |          |          |  |      |          |          |          |          |          |      |          |          |          |          |          |      |          |          |          |          |          |      |          |          |          |          |          |     |          |          |          |          |          |  |   |   |   |   |  |      |          |  |  |  |  |      |          |          |  |  |  |      |          |          |          |  |  |     |          |          |          |          |  |
|                                                                                                                                | 6                                                                                                                                                                                                                                                                                                                                                                                                                                                                                                                                                                                                                                                                                                                                                                                                                                                                                                                                                                                                                                                                                                                                                                                                                                                                                                                                                                                                                                                                                                        | 7        | 8        | 9        |          |   |   |     |          |  |  |  |  |     |          |          |  |  |  |     |          |          |          |  |  |      |          |          |          |          |  |      |          |          |          |          |          |      |          |          |          |          |          |      |          |          |          |          |          |      |          |          |          |          |          |     |          |          |          |          |          |  |   |   |   |   |  |      |          |  |  |  |  |      |          |          |  |  |  |      |          |          |          |  |  |     |          |          |          |          |  |
| 6 Re                                                                                                                           | 0.000000                                                                                                                                                                                                                                                                                                                                                                                                                                                                                                                                                                                                                                                                                                                                                                                                                                                                                                                                                                                                                                                                                                                                                                                                                                                                                                                                                                                                                                                                                                 |          |          |          |          |   |   |     |          |  |  |  |  |     |          |          |  |  |  |     |          |          |          |  |  |      |          |          |          |          |  |      |          |          |          |          |          |      |          |          |          |          |          |      |          |          |          |          |          |      |          |          |          |          |          |     |          |          |          |          |          |  |   |   |   |   |  |      |          |  |  |  |  |      |          |          |  |  |  |      |          |          |          |  |  |     |          |          |          |          |  |
| 7 Re                                                                                                                           | 2.409194                                                                                                                                                                                                                                                                                                                                                                                                                                                                                                                                                                                                                                                                                                                                                                                                                                                                                                                                                                                                                                                                                                                                                                                                                                                                                                                                                                                                                                                                                                 | 0.000000 |          |          |          |   |   |     |          |  |  |  |  |     |          |          |  |  |  |     |          |          |          |  |  |      |          |          |          |          |  |      |          |          |          |          |          |      |          |          |          |          |          |      |          |          |          |          |          |      |          |          |          |          |          |     |          |          |          |          |          |  |   |   |   |   |  |      |          |  |  |  |  |      |          |          |  |  |  |      |          |          |          |  |  |     |          |          |          |          |  |
| 8 B                                                                                                                            | 3.051764                                                                                                                                                                                                                                                                                                                                                                                                                                                                                                                                                                                                                                                                                                                                                                                                                                                                                                                                                                                                                                                                                                                                                                                                                                                                                                                                                                                                                                                                                                 | 2.378724 | 0.000000 |          |          |   |   |     |          |  |  |  |  |     |          |          |  |  |  |     |          |          |          |  |  |      |          |          |          |          |  |      |          |          |          |          |          |      |          |          |          |          |          |      |          |          |          |          |          |      |          |          |          |          |          |     |          |          |          |          |          |  |   |   |   |   |  |      |          |  |  |  |  |      |          |          |  |  |  |      |          |          |          |  |  |     |          |          |          |          |  |
| 9 B                                                                                                                            | 2.246966                                                                                                                                                                                                                                                                                                                                                                                                                                                                                                                                                                                                                                                                                                                                                                                                                                                                                                                                                                                                                                                                                                                                                                                                                                                                                                                                                                                                                                                                                                 | 3.514071 | 2.960022 | 0.000000 |          |   |   |     |          |  |  |  |  |     |          |          |  |  |  |     |          |          |          |  |  |      |          |          |          |          |  |      |          |          |          |          |          |      |          |          |          |          |          |      |          |          |          |          |          |      |          |          |          |          |          |     |          |          |          |          |          |  |   |   |   |   |  |      |          |  |  |  |  |      |          |          |  |  |  |      |          |          |          |  |  |     |          |          |          |          |  |
|  <p>9. -968.3655883 +37.6 C<sub>s</sub></p> | <table border="1"> <thead> <tr> <th></th> <th>1</th> <th>2</th> <th>3</th> <th>4</th> <th>5</th> </tr> </thead> <tbody> <tr><td>1 B</td><td>0.000000</td><td></td><td></td><td></td><td></td></tr> <tr><td>2 B</td><td>1.893175</td><td>0.000000</td><td></td><td></td><td></td></tr> <tr><td>3 B</td><td>2.684546</td><td>2.684534</td><td>0.000000</td><td></td><td></td></tr> <tr><td>4 Re</td><td>3.293997</td><td>2.333996</td><td>2.300429</td><td>0.000000</td><td></td></tr> <tr><td>5 Re</td><td>2.181831</td><td>2.181834</td><td>3.372536</td><td>2.392657</td><td>0.000000</td></tr> <tr><td>6 B</td><td>2.945529</td><td>1.778652</td><td>1.773949</td><td>2.081926</td><td>3.407556</td></tr> <tr><td>7 B</td><td>1.825757</td><td>1.825759</td><td>1.924317</td><td>3.188885</td><td>3.383214</td></tr> <tr><td>8 Re</td><td>2.333978</td><td>3.293924</td><td>2.300427</td><td>2.853765</td><td>2.392555</td></tr> <tr><td>9 B</td><td>1.778633</td><td>2.945503</td><td>1.773949</td><td>3.555843</td><td>3.407516</td></tr> <tr> <th></th> <th>6</th> <th>7</th> <th>8</th> <th>9</th> <th></th> </tr> <tr><td>6 B</td><td>0.000000</td><td></td><td></td><td></td><td></td></tr> <tr><td>7 B</td><td>1.731052</td><td>0.000000</td><td></td><td></td><td></td></tr> <tr><td>8 Re</td><td>3.555822</td><td>3.188866</td><td>0.000000</td><td></td><td></td></tr> <tr><td>9 B</td><td>2.911772</td><td>1.731043</td><td>2.081934</td><td>0.000000</td><td></td></tr> </tbody> </table>  |          | 1        | 2        | 3        | 4 | 5 | 1 B | 0.000000 |  |  |  |  | 2 B | 1.893175 | 0.000000 |  |  |  | 3 B | 2.684546 | 2.684534 | 0.000000 |  |  | 4 Re | 3.293997 | 2.333996 | 2.300429 | 0.000000 |  | 5 Re | 2.181831 | 2.181834 | 3.372536 | 2.392657 | 0.000000 | 6 B  | 2.945529 | 1.778652 | 1.773949 | 2.081926 | 3.407556 | 7 B  | 1.825757 | 1.825759 | 1.924317 | 3.188885 | 3.383214 | 8 Re | 2.333978 | 3.293924 | 2.300427 | 2.853765 | 2.392555 | 9 B | 1.778633 | 2.945503 | 1.773949 | 3.555843 | 3.407516 |  | 6 | 7 | 8 | 9 |  | 6 B  | 0.000000 |  |  |  |  | 7 B  | 1.731052 | 0.000000 |  |  |  | 8 Re | 3.555822 | 3.188866 | 0.000000 |  |  | 9 B | 2.911772 | 1.731043 | 2.081934 | 0.000000 |  |
|                                                                                                                                | 1                                                                                                                                                                                                                                                                                                                                                                                                                                                                                                                                                                                                                                                                                                                                                                                                                                                                                                                                                                                                                                                                                                                                                                                                                                                                                                                                                                                                                                                                                                        | 2        | 3        | 4        | 5        |   |   |     |          |  |  |  |  |     |          |          |  |  |  |     |          |          |          |  |  |      |          |          |          |          |  |      |          |          |          |          |          |      |          |          |          |          |          |      |          |          |          |          |          |      |          |          |          |          |          |     |          |          |          |          |          |  |   |   |   |   |  |      |          |  |  |  |  |      |          |          |  |  |  |      |          |          |          |  |  |     |          |          |          |          |  |
| 1 B                                                                                                                            | 0.000000                                                                                                                                                                                                                                                                                                                                                                                                                                                                                                                                                                                                                                                                                                                                                                                                                                                                                                                                                                                                                                                                                                                                                                                                                                                                                                                                                                                                                                                                                                 |          |          |          |          |   |   |     |          |  |  |  |  |     |          |          |  |  |  |     |          |          |          |  |  |      |          |          |          |          |  |      |          |          |          |          |          |      |          |          |          |          |          |      |          |          |          |          |          |      |          |          |          |          |          |     |          |          |          |          |          |  |   |   |   |   |  |      |          |  |  |  |  |      |          |          |  |  |  |      |          |          |          |  |  |     |          |          |          |          |  |
| 2 B                                                                                                                            | 1.893175                                                                                                                                                                                                                                                                                                                                                                                                                                                                                                                                                                                                                                                                                                                                                                                                                                                                                                                                                                                                                                                                                                                                                                                                                                                                                                                                                                                                                                                                                                 | 0.000000 |          |          |          |   |   |     |          |  |  |  |  |     |          |          |  |  |  |     |          |          |          |  |  |      |          |          |          |          |  |      |          |          |          |          |          |      |          |          |          |          |          |      |          |          |          |          |          |      |          |          |          |          |          |     |          |          |          |          |          |  |   |   |   |   |  |      |          |  |  |  |  |      |          |          |  |  |  |      |          |          |          |  |  |     |          |          |          |          |  |
| 3 B                                                                                                                            | 2.684546                                                                                                                                                                                                                                                                                                                                                                                                                                                                                                                                                                                                                                                                                                                                                                                                                                                                                                                                                                                                                                                                                                                                                                                                                                                                                                                                                                                                                                                                                                 | 2.684534 | 0.000000 |          |          |   |   |     |          |  |  |  |  |     |          |          |  |  |  |     |          |          |          |  |  |      |          |          |          |          |  |      |          |          |          |          |          |      |          |          |          |          |          |      |          |          |          |          |          |      |          |          |          |          |          |     |          |          |          |          |          |  |   |   |   |   |  |      |          |  |  |  |  |      |          |          |  |  |  |      |          |          |          |  |  |     |          |          |          |          |  |
| 4 Re                                                                                                                           | 3.293997                                                                                                                                                                                                                                                                                                                                                                                                                                                                                                                                                                                                                                                                                                                                                                                                                                                                                                                                                                                                                                                                                                                                                                                                                                                                                                                                                                                                                                                                                                 | 2.333996 | 2.300429 | 0.000000 |          |   |   |     |          |  |  |  |  |     |          |          |  |  |  |     |          |          |          |  |  |      |          |          |          |          |  |      |          |          |          |          |          |      |          |          |          |          |          |      |          |          |          |          |          |      |          |          |          |          |          |     |          |          |          |          |          |  |   |   |   |   |  |      |          |  |  |  |  |      |          |          |  |  |  |      |          |          |          |  |  |     |          |          |          |          |  |
| 5 Re                                                                                                                           | 2.181831                                                                                                                                                                                                                                                                                                                                                                                                                                                                                                                                                                                                                                                                                                                                                                                                                                                                                                                                                                                                                                                                                                                                                                                                                                                                                                                                                                                                                                                                                                 | 2.181834 | 3.372536 | 2.392657 | 0.000000 |   |   |     |          |  |  |  |  |     |          |          |  |  |  |     |          |          |          |  |  |      |          |          |          |          |  |      |          |          |          |          |          |      |          |          |          |          |          |      |          |          |          |          |          |      |          |          |          |          |          |     |          |          |          |          |          |  |   |   |   |   |  |      |          |  |  |  |  |      |          |          |  |  |  |      |          |          |          |  |  |     |          |          |          |          |  |
| 6 B                                                                                                                            | 2.945529                                                                                                                                                                                                                                                                                                                                                                                                                                                                                                                                                                                                                                                                                                                                                                                                                                                                                                                                                                                                                                                                                                                                                                                                                                                                                                                                                                                                                                                                                                 | 1.778652 | 1.773949 | 2.081926 | 3.407556 |   |   |     |          |  |  |  |  |     |          |          |  |  |  |     |          |          |          |  |  |      |          |          |          |          |  |      |          |          |          |          |          |      |          |          |          |          |          |      |          |          |          |          |          |      |          |          |          |          |          |     |          |          |          |          |          |  |   |   |   |   |  |      |          |  |  |  |  |      |          |          |  |  |  |      |          |          |          |  |  |     |          |          |          |          |  |
| 7 B                                                                                                                            | 1.825757                                                                                                                                                                                                                                                                                                                                                                                                                                                                                                                                                                                                                                                                                                                                                                                                                                                                                                                                                                                                                                                                                                                                                                                                                                                                                                                                                                                                                                                                                                 | 1.825759 | 1.924317 | 3.188885 | 3.383214 |   |   |     |          |  |  |  |  |     |          |          |  |  |  |     |          |          |          |  |  |      |          |          |          |          |  |      |          |          |          |          |          |      |          |          |          |          |          |      |          |          |          |          |          |      |          |          |          |          |          |     |          |          |          |          |          |  |   |   |   |   |  |      |          |  |  |  |  |      |          |          |  |  |  |      |          |          |          |  |  |     |          |          |          |          |  |
| 8 Re                                                                                                                           | 2.333978                                                                                                                                                                                                                                                                                                                                                                                                                                                                                                                                                                                                                                                                                                                                                                                                                                                                                                                                                                                                                                                                                                                                                                                                                                                                                                                                                                                                                                                                                                 | 3.293924 | 2.300427 | 2.853765 | 2.392555 |   |   |     |          |  |  |  |  |     |          |          |  |  |  |     |          |          |          |  |  |      |          |          |          |          |  |      |          |          |          |          |          |      |          |          |          |          |          |      |          |          |          |          |          |      |          |          |          |          |          |     |          |          |          |          |          |  |   |   |   |   |  |      |          |  |  |  |  |      |          |          |  |  |  |      |          |          |          |  |  |     |          |          |          |          |  |
| 9 B                                                                                                                            | 1.778633                                                                                                                                                                                                                                                                                                                                                                                                                                                                                                                                                                                                                                                                                                                                                                                                                                                                                                                                                                                                                                                                                                                                                                                                                                                                                                                                                                                                                                                                                                 | 2.945503 | 1.773949 | 3.555843 | 3.407516 |   |   |     |          |  |  |  |  |     |          |          |  |  |  |     |          |          |          |  |  |      |          |          |          |          |  |      |          |          |          |          |          |      |          |          |          |          |          |      |          |          |          |          |          |      |          |          |          |          |          |     |          |          |          |          |          |  |   |   |   |   |  |      |          |  |  |  |  |      |          |          |  |  |  |      |          |          |          |  |  |     |          |          |          |          |  |
|                                                                                                                                | 6                                                                                                                                                                                                                                                                                                                                                                                                                                                                                                                                                                                                                                                                                                                                                                                                                                                                                                                                                                                                                                                                                                                                                                                                                                                                                                                                                                                                                                                                                                        | 7        | 8        | 9        |          |   |   |     |          |  |  |  |  |     |          |          |  |  |  |     |          |          |          |  |  |      |          |          |          |          |  |      |          |          |          |          |          |      |          |          |          |          |          |      |          |          |          |          |          |      |          |          |          |          |          |     |          |          |          |          |          |  |   |   |   |   |  |      |          |  |  |  |  |      |          |          |  |  |  |      |          |          |          |  |  |     |          |          |          |          |  |
| 6 B                                                                                                                            | 0.000000                                                                                                                                                                                                                                                                                                                                                                                                                                                                                                                                                                                                                                                                                                                                                                                                                                                                                                                                                                                                                                                                                                                                                                                                                                                                                                                                                                                                                                                                                                 |          |          |          |          |   |   |     |          |  |  |  |  |     |          |          |  |  |  |     |          |          |          |  |  |      |          |          |          |          |  |      |          |          |          |          |          |      |          |          |          |          |          |      |          |          |          |          |          |      |          |          |          |          |          |     |          |          |          |          |          |  |   |   |   |   |  |      |          |  |  |  |  |      |          |          |  |  |  |      |          |          |          |  |  |     |          |          |          |          |  |
| 7 B                                                                                                                            | 1.731052                                                                                                                                                                                                                                                                                                                                                                                                                                                                                                                                                                                                                                                                                                                                                                                                                                                                                                                                                                                                                                                                                                                                                                                                                                                                                                                                                                                                                                                                                                 | 0.000000 |          |          |          |   |   |     |          |  |  |  |  |     |          |          |  |  |  |     |          |          |          |  |  |      |          |          |          |          |  |      |          |          |          |          |          |      |          |          |          |          |          |      |          |          |          |          |          |      |          |          |          |          |          |     |          |          |          |          |          |  |   |   |   |   |  |      |          |  |  |  |  |      |          |          |  |  |  |      |          |          |          |  |  |     |          |          |          |          |  |
| 8 Re                                                                                                                           | 3.555822                                                                                                                                                                                                                                                                                                                                                                                                                                                                                                                                                                                                                                                                                                                                                                                                                                                                                                                                                                                                                                                                                                                                                                                                                                                                                                                                                                                                                                                                                                 | 3.188866 | 0.000000 |          |          |   |   |     |          |  |  |  |  |     |          |          |  |  |  |     |          |          |          |  |  |      |          |          |          |          |  |      |          |          |          |          |          |      |          |          |          |          |          |      |          |          |          |          |          |      |          |          |          |          |          |     |          |          |          |          |          |  |   |   |   |   |  |      |          |  |  |  |  |      |          |          |  |  |  |      |          |          |          |  |  |     |          |          |          |          |  |
| 9 B                                                                                                                            | 2.911772                                                                                                                                                                                                                                                                                                                                                                                                                                                                                                                                                                                                                                                                                                                                                                                                                                                                                                                                                                                                                                                                                                                                                                                                                                                                                                                                                                                                                                                                                                 | 1.731043 | 2.081934 | 0.000000 |          |   |   |     |          |  |  |  |  |     |          |          |  |  |  |     |          |          |          |  |  |      |          |          |          |          |  |      |          |          |          |          |          |      |          |          |          |          |          |      |          |          |          |          |          |      |          |          |          |          |          |     |          |          |          |          |          |  |   |   |   |   |  |      |          |  |  |  |  |      |          |          |  |  |  |      |          |          |          |  |  |     |          |          |          |          |  |

Table S5C. Energy ranking for all of the  $\text{Cp}_3\text{Re}_3\text{B}_6\text{H}_6$  optimized structures after B3LYP/6-31G(d) optimizations:

| No. | Structure                         | Final energy (a.u.) | $\Delta E$<br>(kcal/mol) |
|-----|-----------------------------------|---------------------|--------------------------|
| 1   | 09v-01-PressCapCube__Re l         | -968.1326974        | 0.00                     |
| 2   | 09v-03-TricTrPrism__Re m __r-103  | -968.1325838        | 0.07                     |
| 3   | 09v-03-TricTrPrism__Re j __r-15   | -968.1222372        | 6.56                     |
| 4   | 09v-03-TricTrPrism__Re j __i-15   | -968.1220467        | 6.68                     |
| 5   | 09v-03-TricTrPrism__Re h          | -968.1116228        | 13.22                    |
| 6   | 09v-02-Tl99__Re n __r-44          | -968.1114761        | 13.32                    |
| 7   | 09v-02-Tl99__Re n __i-44          | -968.1107054        | 13.80                    |
| 8   | 09v-01-PressCapCube__Re p         | -968.1079784        | 15.51                    |
| 9   | 09v-03-TricTrPrism__Re e          | -968.1079748        | 15.51                    |
| 10  | 09v-01-PressCapCube__Re c __i-17  | -968.0969311        | 22.44                    |
| 11  | 09v-01-PressCapCube__Re c __r-17  | -968.0968813        | 22.48                    |
| 12  | 09v-01-PressCapCube__Re o         | -968.0964124        | 22.77                    |
| 13  | 09v-01-PressCapCube__Re t __r-135 | -968.0952157        | 23.52                    |
| 14  | 09v-01-PressCapCube__Re m __r-145 | -968.0932564        | 24.75                    |
| 15  | 09v-01-PressCapCube__Re s         | -968.0908309        | 26.27                    |
| 16  | 09v-02-Tl99__Re l                 | -968.0908308        | 26.27                    |
| 17  | 09v-03-TricTrPrism__Re a          | -968.0908281        | 26.27                    |
| 18  | 09v-01-PressCapCube__Re d __r-234 | -968.0906137        | 26.41                    |
| 19  | 09v-03-TricTrPrism__Re i          | -968.0905839        | 26.43                    |
| 20  | 09v-02-Tl99__Re d                 | -968.0905552        | 26.45                    |
| 21  | 09v-03-TricTrPrism__Re c          | -968.0905533        | 26.45                    |
| 22  | 09v-02-Tl99__Re e                 | -968.0905489        | 26.45                    |
| 23  | 09v-03-TricTrPrism__Re g          | -968.0905461        | 26.45                    |
| 24  | 09v-03-TricTrPrism__Re n __r-102  | -968.0879266        | 28.09                    |
| 25  | 09v-03-TricTrPrism__Re k          | -968.0869033        | 28.74                    |
| 26  | 09v-02-Tl99__Re i                 | -968.0868927        | 28.74                    |
| 27  | 09v-02-Tl99__Re c __r-803         | -968.0822852        | 31.63                    |
| 28  | 09v-01-PressCapCube__Re m __i-145 | -968.0812718        | 32.27                    |
| 29  | 09v-03-TricTrPrism__Re m __i-103  | -968.0810267        | 32.42                    |
| 30  | 09v-02-Tl99__Re p                 | -968.0790288        | 33.68                    |
| 31  | 09v-01-PressCapCube__Re f __r-39  | -968.0779306        | 34.37                    |
| 32  | 09v-01-PressCapCube__Re i         | -968.0778837        | 34.40                    |
| 33  | 09v-02-Tl99__Re g                 | -968.0767224        | 35.13                    |
| 34  | 09v-02-Tl99__Re q                 | -968.0766388        | 35.18                    |
| 35  | 09v-02-Tl99__Re r                 | -968.0766388        | 35.18                    |
| 36  | 09v-02-Tl99__Re j                 | -968.0766289        | 35.18                    |
| 37  | 09v-01-PressCapCube__Re f __i-39  | -968.0763818        | 35.34                    |

|    |                                  |              |       |
|----|----------------------------------|--------------|-------|
| 38 | 09v-02-TI99__Re t _r-13          | -968.0760767 | 35.53 |
| 39 | 09v-02-TI99__Re t _i-13          | -968.0750538 | 36.17 |
| 40 | 09v-02-TI99__Re b                | -968.0730687 | 37.42 |
| 41 | 09v-02-TI99__Re h                | -968.0709351 | 38.76 |
| 42 | 09v-03-TricTrPrism__Re b         | -968.0709351 | 38.76 |
| 43 | 09v-01-PressCapCube__Re g        | -968.0709350 | 38.76 |
| 44 | 09v-03-TricTrPrism__Re f         | -968.0696592 | 39.56 |
| 45 | 09v-01-PressCapCube__Re e        | -968.0684016 | 40.35 |
| 46 | 09v-01-PressCapCube__Re n _r-92  | -968.0662932 | 41.67 |
| 47 | 09v-03-TricTrPrism__Re d         | -968.0658488 | 41.95 |
| 48 | 09v-01-PressCapCube__Re u        | -968.0641340 | 43.02 |
| 49 | 09v-02-TI99__Re f                | -968.0599202 | 45.67 |
| 50 | 09v-03-TricTrPrism__Re l         | -968.0564982 | 47.82 |
| 51 | 09v-01-PressCapCube__Re q        | -968.0562819 | 47.95 |
| 52 | 09v-02-TI99__Re s                | -968.0543996 | 49.13 |
| 53 | 09v-02-TI99__Re k                | -968.0518574 | 50.73 |
| 54 | 09v-01-PressCapCube__Re b        | -968.0511942 | 51.14 |
| 55 | 09v-01-PressCapCube__Re n _i-92  | -968.0488493 | 52.62 |
| 56 | 09v-03-TricTrPrism__Re n _i-102  | -968.0484218 | 52.88 |
| 57 | 09v-01-PressCapCube__Re j        | -968.0465537 | 54.06 |
| 58 | 09v-02-TI99__Re o                | -968.0463664 | 54.17 |
| 59 | 09v-01-PressCapCube__Re t _i-135 | -968.0361032 | 60.61 |
| 60 | 09v-02-TI99__Re c _i-803         | -968.0320657 | 63.15 |
| 61 | 09v-01-PressCapCube__Re k        | -968.0304216 | 64.18 |
| 62 | 09v-02-TI99__Re m                | -968.0274668 | 66.03 |
| 63 | 09v-02-TI99__Re a                | -968.0251573 | 67.48 |
| 64 | 09v-01-PressCapCube__Re r _r-26  | -968.0027440 | 81.55 |
| 65 | 09v-01-PressCapCube__Re r _i-26  | -968.0017691 | 82.16 |
| 66 | 09v-01-PressCapCube__Re a _r-77  | -967.9951146 | 86.34 |
| 67 | 09v-01-PressCapCube__Re h        | -967.9851315 | 92.60 |
| 68 | 09v-01-PressCapCube__Re a _i-77  | -967.9837385 | 93.47 |
| 69 | 09v-01-PressCapCube__Re d _i-234 | -967.9735126 | 99.89 |

Table S6A. Initial  $\text{Cp}_3\text{Re}_3\text{B}_7\text{H}_7$  structures, 110 structures.

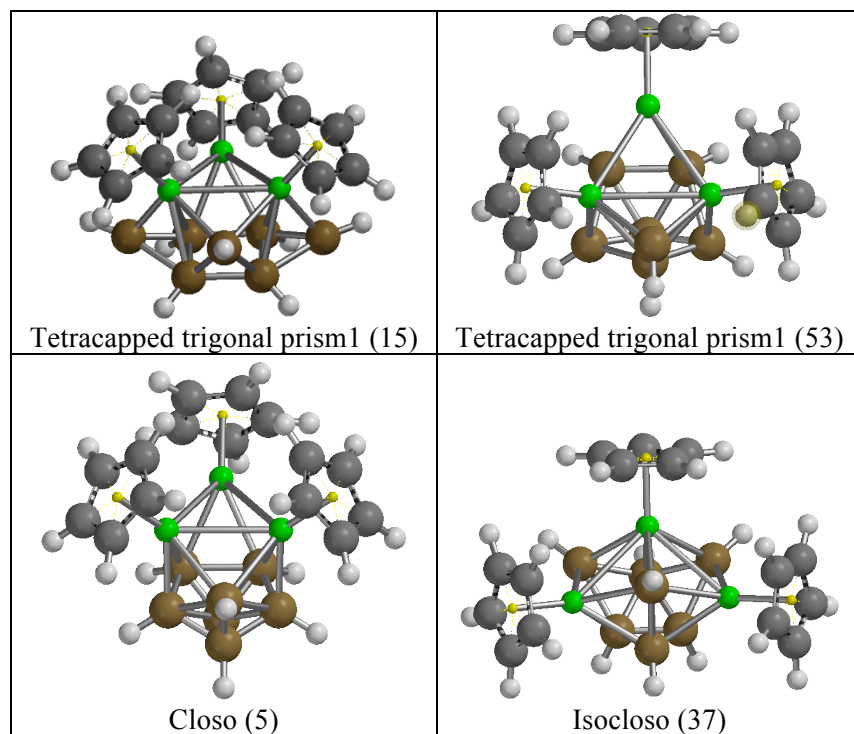

Table S6B. Distance table for the lowest-lying Cp<sub>3</sub>Re<sub>3</sub>B<sub>7</sub>H<sub>7</sub> structures after M06L/6-311G(d,p) optimization. Included are the ZPcorrected E (a.u.), relative energy (kcal/mol) and symmetry. For clarity only the atoms forming the cluster framework are presented.

| 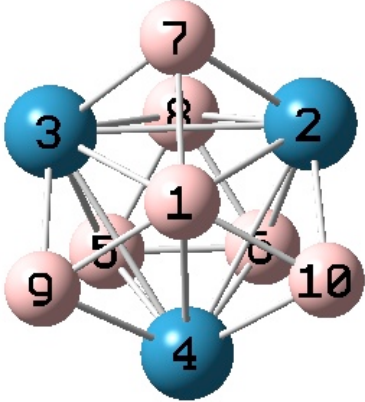 <p><b>1. -993.92792330 0.0 C<sub>3v</sub></b></p>  | <table border="1"> <thead> <tr> <th></th> <th>1</th> <th>2</th> <th>3</th> <th>4</th> <th>5</th> </tr> </thead> <tbody> <tr><td>1 B</td><td>0.000000</td><td></td><td></td><td></td><td></td></tr> <tr><td>2 Re</td><td>2.281709</td><td>0.000000</td><td></td><td></td><td></td></tr> <tr><td>3 Re</td><td>2.283191</td><td>2.837007</td><td>0.000000</td><td></td><td></td></tr> <tr><td>4 Re</td><td>2.284783</td><td>2.837747</td><td>2.835439</td><td>0.000000</td><td></td></tr> <tr><td>5 B</td><td>3.460335</td><td>3.138575</td><td>2.237531</td><td>2.241891</td><td>0.000000</td></tr> <tr><td>6 B</td><td>3.459196</td><td>2.242786</td><td>3.135078</td><td>2.238961</td><td>1.699462</td></tr> <tr><td>7 B</td><td>1.836565</td><td>2.090081</td><td>2.090905</td><td>3.630714</td><td>3.797305</td></tr> <tr><td>8 B</td><td>3.457251</td><td>2.239541</td><td>2.239092</td><td>3.135284</td><td>1.698365</td></tr> <tr><td>9 B</td><td>1.838599</td><td>3.631072</td><td>2.090575</td><td>2.092114</td><td>3.027130</td></tr> <tr><td>10 B</td><td>1.835406</td><td>2.092168</td><td>3.629143</td><td>2.090861</td><td>3.800662</td></tr> <tr> <th></th> <th>6</th> <th>7</th> <th>8</th> <th>9</th> <th>10</th> </tr> <tr><td>6 B</td><td>0.000000</td><td></td><td></td><td></td><td></td></tr> <tr><td>7 B</td><td>3.798532</td><td>0.000000</td><td></td><td></td><td></td></tr> <tr><td>8 B</td><td>1.698547</td><td>3.023047</td><td>0.000000</td><td></td><td></td></tr> <tr><td>9 B</td><td>3.798823</td><td>3.104824</td><td>3.798553</td><td>0.000000</td><td></td></tr> <tr><td>10 B</td><td>3.027372</td><td>3.105196</td><td>3.797837</td><td>3.103219</td><td>0.000000</td></tr> </tbody> </table>  |          | 1        | 2        | 3        | 4 | 5 | 1 B  | 0.000000 |  |  |  |  | 2 Re | 2.281709 | 0.000000 |  |  |  | 3 Re | 2.283191 | 2.837007 | 0.000000 |  |  | 4 Re | 2.284783 | 2.837747 | 2.835439 | 0.000000 |  | 5 B  | 3.460335 | 3.138575 | 2.237531 | 2.241891 | 0.000000 | 6 B | 3.459196 | 2.242786 | 3.135078 | 2.238961 | 1.699462 | 7 B  | 1.836565 | 2.090081 | 2.090905 | 3.630714 | 3.797305 | 8 B | 3.457251 | 2.239541 | 2.239092 | 3.135284 | 1.698365 | 9 B | 1.838599 | 3.631072 | 2.090575 | 2.092114 | 3.027130 | 10 B | 1.835406 | 2.092168 | 3.629143 | 2.090861 | 3.800662 |  | 6 | 7 | 8 | 9 | 10 | 6 B | 0.000000 |  |  |  |  | 7 B  | 3.798532 | 0.000000 |  |  |  | 8 B | 1.698547 | 3.023047 | 0.000000 |  |  | 9 B | 3.798823 | 3.104824 | 3.798553 | 0.000000 |  | 10 B | 3.027372 | 3.105196 | 3.797837 | 3.103219 | 0.000000 |
|--------------------------------------------------------------------------------------------------------------------------------------|-----------------------------------------------------------------------------------------------------------------------------------------------------------------------------------------------------------------------------------------------------------------------------------------------------------------------------------------------------------------------------------------------------------------------------------------------------------------------------------------------------------------------------------------------------------------------------------------------------------------------------------------------------------------------------------------------------------------------------------------------------------------------------------------------------------------------------------------------------------------------------------------------------------------------------------------------------------------------------------------------------------------------------------------------------------------------------------------------------------------------------------------------------------------------------------------------------------------------------------------------------------------------------------------------------------------------------------------------------------------------------------------------------------------------------------------------------------------------------------------------------------------------------------------------------------------------------------------------------------------------------------------------------------------------------------------------------------------------------------|----------|----------|----------|----------|---|---|------|----------|--|--|--|--|------|----------|----------|--|--|--|------|----------|----------|----------|--|--|------|----------|----------|----------|----------|--|------|----------|----------|----------|----------|----------|-----|----------|----------|----------|----------|----------|------|----------|----------|----------|----------|----------|-----|----------|----------|----------|----------|----------|-----|----------|----------|----------|----------|----------|------|----------|----------|----------|----------|----------|--|---|---|---|---|----|-----|----------|--|--|--|--|------|----------|----------|--|--|--|-----|----------|----------|----------|--|--|-----|----------|----------|----------|----------|--|------|----------|----------|----------|----------|----------|
|                                                                                                                                      | 1                                                                                                                                                                                                                                                                                                                                                                                                                                                                                                                                                                                                                                                                                                                                                                                                                                                                                                                                                                                                                                                                                                                                                                                                                                                                                                                                                                                                                                                                                                                                                                                                                                                                                                                                 | 2        | 3        | 4        | 5        |   |   |      |          |  |  |  |  |      |          |          |  |  |  |      |          |          |          |  |  |      |          |          |          |          |  |      |          |          |          |          |          |     |          |          |          |          |          |      |          |          |          |          |          |     |          |          |          |          |          |     |          |          |          |          |          |      |          |          |          |          |          |  |   |   |   |   |    |     |          |  |  |  |  |      |          |          |  |  |  |     |          |          |          |  |  |     |          |          |          |          |  |      |          |          |          |          |          |
| 1 B                                                                                                                                  | 0.000000                                                                                                                                                                                                                                                                                                                                                                                                                                                                                                                                                                                                                                                                                                                                                                                                                                                                                                                                                                                                                                                                                                                                                                                                                                                                                                                                                                                                                                                                                                                                                                                                                                                                                                                          |          |          |          |          |   |   |      |          |  |  |  |  |      |          |          |  |  |  |      |          |          |          |  |  |      |          |          |          |          |  |      |          |          |          |          |          |     |          |          |          |          |          |      |          |          |          |          |          |     |          |          |          |          |          |     |          |          |          |          |          |      |          |          |          |          |          |  |   |   |   |   |    |     |          |  |  |  |  |      |          |          |  |  |  |     |          |          |          |  |  |     |          |          |          |          |  |      |          |          |          |          |          |
| 2 Re                                                                                                                                 | 2.281709                                                                                                                                                                                                                                                                                                                                                                                                                                                                                                                                                                                                                                                                                                                                                                                                                                                                                                                                                                                                                                                                                                                                                                                                                                                                                                                                                                                                                                                                                                                                                                                                                                                                                                                          | 0.000000 |          |          |          |   |   |      |          |  |  |  |  |      |          |          |  |  |  |      |          |          |          |  |  |      |          |          |          |          |  |      |          |          |          |          |          |     |          |          |          |          |          |      |          |          |          |          |          |     |          |          |          |          |          |     |          |          |          |          |          |      |          |          |          |          |          |  |   |   |   |   |    |     |          |  |  |  |  |      |          |          |  |  |  |     |          |          |          |  |  |     |          |          |          |          |  |      |          |          |          |          |          |
| 3 Re                                                                                                                                 | 2.283191                                                                                                                                                                                                                                                                                                                                                                                                                                                                                                                                                                                                                                                                                                                                                                                                                                                                                                                                                                                                                                                                                                                                                                                                                                                                                                                                                                                                                                                                                                                                                                                                                                                                                                                          | 2.837007 | 0.000000 |          |          |   |   |      |          |  |  |  |  |      |          |          |  |  |  |      |          |          |          |  |  |      |          |          |          |          |  |      |          |          |          |          |          |     |          |          |          |          |          |      |          |          |          |          |          |     |          |          |          |          |          |     |          |          |          |          |          |      |          |          |          |          |          |  |   |   |   |   |    |     |          |  |  |  |  |      |          |          |  |  |  |     |          |          |          |  |  |     |          |          |          |          |  |      |          |          |          |          |          |
| 4 Re                                                                                                                                 | 2.284783                                                                                                                                                                                                                                                                                                                                                                                                                                                                                                                                                                                                                                                                                                                                                                                                                                                                                                                                                                                                                                                                                                                                                                                                                                                                                                                                                                                                                                                                                                                                                                                                                                                                                                                          | 2.837747 | 2.835439 | 0.000000 |          |   |   |      |          |  |  |  |  |      |          |          |  |  |  |      |          |          |          |  |  |      |          |          |          |          |  |      |          |          |          |          |          |     |          |          |          |          |          |      |          |          |          |          |          |     |          |          |          |          |          |     |          |          |          |          |          |      |          |          |          |          |          |  |   |   |   |   |    |     |          |  |  |  |  |      |          |          |  |  |  |     |          |          |          |  |  |     |          |          |          |          |  |      |          |          |          |          |          |
| 5 B                                                                                                                                  | 3.460335                                                                                                                                                                                                                                                                                                                                                                                                                                                                                                                                                                                                                                                                                                                                                                                                                                                                                                                                                                                                                                                                                                                                                                                                                                                                                                                                                                                                                                                                                                                                                                                                                                                                                                                          | 3.138575 | 2.237531 | 2.241891 | 0.000000 |   |   |      |          |  |  |  |  |      |          |          |  |  |  |      |          |          |          |  |  |      |          |          |          |          |  |      |          |          |          |          |          |     |          |          |          |          |          |      |          |          |          |          |          |     |          |          |          |          |          |     |          |          |          |          |          |      |          |          |          |          |          |  |   |   |   |   |    |     |          |  |  |  |  |      |          |          |  |  |  |     |          |          |          |  |  |     |          |          |          |          |  |      |          |          |          |          |          |
| 6 B                                                                                                                                  | 3.459196                                                                                                                                                                                                                                                                                                                                                                                                                                                                                                                                                                                                                                                                                                                                                                                                                                                                                                                                                                                                                                                                                                                                                                                                                                                                                                                                                                                                                                                                                                                                                                                                                                                                                                                          | 2.242786 | 3.135078 | 2.238961 | 1.699462 |   |   |      |          |  |  |  |  |      |          |          |  |  |  |      |          |          |          |  |  |      |          |          |          |          |  |      |          |          |          |          |          |     |          |          |          |          |          |      |          |          |          |          |          |     |          |          |          |          |          |     |          |          |          |          |          |      |          |          |          |          |          |  |   |   |   |   |    |     |          |  |  |  |  |      |          |          |  |  |  |     |          |          |          |  |  |     |          |          |          |          |  |      |          |          |          |          |          |
| 7 B                                                                                                                                  | 1.836565                                                                                                                                                                                                                                                                                                                                                                                                                                                                                                                                                                                                                                                                                                                                                                                                                                                                                                                                                                                                                                                                                                                                                                                                                                                                                                                                                                                                                                                                                                                                                                                                                                                                                                                          | 2.090081 | 2.090905 | 3.630714 | 3.797305 |   |   |      |          |  |  |  |  |      |          |          |  |  |  |      |          |          |          |  |  |      |          |          |          |          |  |      |          |          |          |          |          |     |          |          |          |          |          |      |          |          |          |          |          |     |          |          |          |          |          |     |          |          |          |          |          |      |          |          |          |          |          |  |   |   |   |   |    |     |          |  |  |  |  |      |          |          |  |  |  |     |          |          |          |  |  |     |          |          |          |          |  |      |          |          |          |          |          |
| 8 B                                                                                                                                  | 3.457251                                                                                                                                                                                                                                                                                                                                                                                                                                                                                                                                                                                                                                                                                                                                                                                                                                                                                                                                                                                                                                                                                                                                                                                                                                                                                                                                                                                                                                                                                                                                                                                                                                                                                                                          | 2.239541 | 2.239092 | 3.135284 | 1.698365 |   |   |      |          |  |  |  |  |      |          |          |  |  |  |      |          |          |          |  |  |      |          |          |          |          |  |      |          |          |          |          |          |     |          |          |          |          |          |      |          |          |          |          |          |     |          |          |          |          |          |     |          |          |          |          |          |      |          |          |          |          |          |  |   |   |   |   |    |     |          |  |  |  |  |      |          |          |  |  |  |     |          |          |          |  |  |     |          |          |          |          |  |      |          |          |          |          |          |
| 9 B                                                                                                                                  | 1.838599                                                                                                                                                                                                                                                                                                                                                                                                                                                                                                                                                                                                                                                                                                                                                                                                                                                                                                                                                                                                                                                                                                                                                                                                                                                                                                                                                                                                                                                                                                                                                                                                                                                                                                                          | 3.631072 | 2.090575 | 2.092114 | 3.027130 |   |   |      |          |  |  |  |  |      |          |          |  |  |  |      |          |          |          |  |  |      |          |          |          |          |  |      |          |          |          |          |          |     |          |          |          |          |          |      |          |          |          |          |          |     |          |          |          |          |          |     |          |          |          |          |          |      |          |          |          |          |          |  |   |   |   |   |    |     |          |  |  |  |  |      |          |          |  |  |  |     |          |          |          |  |  |     |          |          |          |          |  |      |          |          |          |          |          |
| 10 B                                                                                                                                 | 1.835406                                                                                                                                                                                                                                                                                                                                                                                                                                                                                                                                                                                                                                                                                                                                                                                                                                                                                                                                                                                                                                                                                                                                                                                                                                                                                                                                                                                                                                                                                                                                                                                                                                                                                                                          | 2.092168 | 3.629143 | 2.090861 | 3.800662 |   |   |      |          |  |  |  |  |      |          |          |  |  |  |      |          |          |          |  |  |      |          |          |          |          |  |      |          |          |          |          |          |     |          |          |          |          |          |      |          |          |          |          |          |     |          |          |          |          |          |     |          |          |          |          |          |      |          |          |          |          |          |  |   |   |   |   |    |     |          |  |  |  |  |      |          |          |  |  |  |     |          |          |          |  |  |     |          |          |          |          |  |      |          |          |          |          |          |
|                                                                                                                                      | 6                                                                                                                                                                                                                                                                                                                                                                                                                                                                                                                                                                                                                                                                                                                                                                                                                                                                                                                                                                                                                                                                                                                                                                                                                                                                                                                                                                                                                                                                                                                                                                                                                                                                                                                                 | 7        | 8        | 9        | 10       |   |   |      |          |  |  |  |  |      |          |          |  |  |  |      |          |          |          |  |  |      |          |          |          |          |  |      |          |          |          |          |          |     |          |          |          |          |          |      |          |          |          |          |          |     |          |          |          |          |          |     |          |          |          |          |          |      |          |          |          |          |          |  |   |   |   |   |    |     |          |  |  |  |  |      |          |          |  |  |  |     |          |          |          |  |  |     |          |          |          |          |  |      |          |          |          |          |          |
| 6 B                                                                                                                                  | 0.000000                                                                                                                                                                                                                                                                                                                                                                                                                                                                                                                                                                                                                                                                                                                                                                                                                                                                                                                                                                                                                                                                                                                                                                                                                                                                                                                                                                                                                                                                                                                                                                                                                                                                                                                          |          |          |          |          |   |   |      |          |  |  |  |  |      |          |          |  |  |  |      |          |          |          |  |  |      |          |          |          |          |  |      |          |          |          |          |          |     |          |          |          |          |          |      |          |          |          |          |          |     |          |          |          |          |          |     |          |          |          |          |          |      |          |          |          |          |          |  |   |   |   |   |    |     |          |  |  |  |  |      |          |          |  |  |  |     |          |          |          |  |  |     |          |          |          |          |  |      |          |          |          |          |          |
| 7 B                                                                                                                                  | 3.798532                                                                                                                                                                                                                                                                                                                                                                                                                                                                                                                                                                                                                                                                                                                                                                                                                                                                                                                                                                                                                                                                                                                                                                                                                                                                                                                                                                                                                                                                                                                                                                                                                                                                                                                          | 0.000000 |          |          |          |   |   |      |          |  |  |  |  |      |          |          |  |  |  |      |          |          |          |  |  |      |          |          |          |          |  |      |          |          |          |          |          |     |          |          |          |          |          |      |          |          |          |          |          |     |          |          |          |          |          |     |          |          |          |          |          |      |          |          |          |          |          |  |   |   |   |   |    |     |          |  |  |  |  |      |          |          |  |  |  |     |          |          |          |  |  |     |          |          |          |          |  |      |          |          |          |          |          |
| 8 B                                                                                                                                  | 1.698547                                                                                                                                                                                                                                                                                                                                                                                                                                                                                                                                                                                                                                                                                                                                                                                                                                                                                                                                                                                                                                                                                                                                                                                                                                                                                                                                                                                                                                                                                                                                                                                                                                                                                                                          | 3.023047 | 0.000000 |          |          |   |   |      |          |  |  |  |  |      |          |          |  |  |  |      |          |          |          |  |  |      |          |          |          |          |  |      |          |          |          |          |          |     |          |          |          |          |          |      |          |          |          |          |          |     |          |          |          |          |          |     |          |          |          |          |          |      |          |          |          |          |          |  |   |   |   |   |    |     |          |  |  |  |  |      |          |          |  |  |  |     |          |          |          |  |  |     |          |          |          |          |  |      |          |          |          |          |          |
| 9 B                                                                                                                                  | 3.798823                                                                                                                                                                                                                                                                                                                                                                                                                                                                                                                                                                                                                                                                                                                                                                                                                                                                                                                                                                                                                                                                                                                                                                                                                                                                                                                                                                                                                                                                                                                                                                                                                                                                                                                          | 3.104824 | 3.798553 | 0.000000 |          |   |   |      |          |  |  |  |  |      |          |          |  |  |  |      |          |          |          |  |  |      |          |          |          |          |  |      |          |          |          |          |          |     |          |          |          |          |          |      |          |          |          |          |          |     |          |          |          |          |          |     |          |          |          |          |          |      |          |          |          |          |          |  |   |   |   |   |    |     |          |  |  |  |  |      |          |          |  |  |  |     |          |          |          |  |  |     |          |          |          |          |  |      |          |          |          |          |          |
| 10 B                                                                                                                                 | 3.027372                                                                                                                                                                                                                                                                                                                                                                                                                                                                                                                                                                                                                                                                                                                                                                                                                                                                                                                                                                                                                                                                                                                                                                                                                                                                                                                                                                                                                                                                                                                                                                                                                                                                                                                          | 3.105196 | 3.797837 | 3.103219 | 0.000000 |   |   |      |          |  |  |  |  |      |          |          |  |  |  |      |          |          |          |  |  |      |          |          |          |          |  |      |          |          |          |          |          |     |          |          |          |          |          |      |          |          |          |          |          |     |          |          |          |          |          |     |          |          |          |          |          |      |          |          |          |          |          |  |   |   |   |   |    |     |          |  |  |  |  |      |          |          |  |  |  |     |          |          |          |  |  |     |          |          |          |          |  |      |          |          |          |          |          |
|  <p><b>2. -993.92309560 +3.0 C<sub>1</sub></b></p> | <table border="1"> <thead> <tr> <th></th> <th>1</th> <th>2</th> <th>3</th> <th>4</th> <th>5</th> </tr> </thead> <tbody> <tr><td>1 Re</td><td>0.000000</td><td></td><td></td><td></td><td></td></tr> <tr><td>2 B</td><td>2.160523</td><td>0.000000</td><td></td><td></td><td></td></tr> <tr><td>3 B</td><td>2.262311</td><td>3.123990</td><td>0.000000</td><td></td><td></td></tr> <tr><td>4 B</td><td>2.281782</td><td>3.211842</td><td>3.394711</td><td>0.000000</td><td></td></tr> <tr><td>5 Re</td><td>2.863951</td><td>3.961513</td><td>2.146200</td><td>2.274477</td><td>0.000000</td></tr> <tr><td>6 B</td><td>2.273287</td><td>1.803939</td><td>3.436530</td><td>1.738127</td><td>3.164677</td></tr> <tr><td>7 Re</td><td>2.845802</td><td>2.087522</td><td>2.255843</td><td>3.145486</td><td>2.775816</td></tr> <tr><td>8 B</td><td>2.346307</td><td>4.170559</td><td>3.074363</td><td>1.774152</td><td>1.989075</td></tr> <tr><td>9 B</td><td>2.176930</td><td>1.936672</td><td>1.769711</td><td>3.887929</td><td>3.549538</td></tr> <tr><td>10 B</td><td>3.176195</td><td>3.193111</td><td>3.337712</td><td>1.743665</td><td>2.167266</td></tr> <tr> <th></th> <th>6</th> <th>7</th> <th>8</th> <th>9</th> <th>10</th> </tr> <tr><td>6 B</td><td>0.000000</td><td></td><td></td><td></td><td></td></tr> <tr><td>7 Re</td><td>2.255398</td><td>0.000000</td><td></td><td></td><td></td></tr> <tr><td>8 B</td><td>3.250935</td><td>3.968270</td><td>0.000000</td><td></td><td></td></tr> <tr><td>9 B</td><td>3.152189</td><td>2.083805</td><td>4.098102</td><td>0.000000</td><td></td></tr> <tr><td>10 B</td><td>1.789544</td><td>2.205435</td><td>3.058202</td><td>3.821907</td><td>0.000000</td></tr> </tbody> </table> |          | 1        | 2        | 3        | 4 | 5 | 1 Re | 0.000000 |  |  |  |  | 2 B  | 2.160523 | 0.000000 |  |  |  | 3 B  | 2.262311 | 3.123990 | 0.000000 |  |  | 4 B  | 2.281782 | 3.211842 | 3.394711 | 0.000000 |  | 5 Re | 2.863951 | 3.961513 | 2.146200 | 2.274477 | 0.000000 | 6 B | 2.273287 | 1.803939 | 3.436530 | 1.738127 | 3.164677 | 7 Re | 2.845802 | 2.087522 | 2.255843 | 3.145486 | 2.775816 | 8 B | 2.346307 | 4.170559 | 3.074363 | 1.774152 | 1.989075 | 9 B | 2.176930 | 1.936672 | 1.769711 | 3.887929 | 3.549538 | 10 B | 3.176195 | 3.193111 | 3.337712 | 1.743665 | 2.167266 |  | 6 | 7 | 8 | 9 | 10 | 6 B | 0.000000 |  |  |  |  | 7 Re | 2.255398 | 0.000000 |  |  |  | 8 B | 3.250935 | 3.968270 | 0.000000 |  |  | 9 B | 3.152189 | 2.083805 | 4.098102 | 0.000000 |  | 10 B | 1.789544 | 2.205435 | 3.058202 | 3.821907 | 0.000000 |
|                                                                                                                                      | 1                                                                                                                                                                                                                                                                                                                                                                                                                                                                                                                                                                                                                                                                                                                                                                                                                                                                                                                                                                                                                                                                                                                                                                                                                                                                                                                                                                                                                                                                                                                                                                                                                                                                                                                                 | 2        | 3        | 4        | 5        |   |   |      |          |  |  |  |  |      |          |          |  |  |  |      |          |          |          |  |  |      |          |          |          |          |  |      |          |          |          |          |          |     |          |          |          |          |          |      |          |          |          |          |          |     |          |          |          |          |          |     |          |          |          |          |          |      |          |          |          |          |          |  |   |   |   |   |    |     |          |  |  |  |  |      |          |          |  |  |  |     |          |          |          |  |  |     |          |          |          |          |  |      |          |          |          |          |          |
| 1 Re                                                                                                                                 | 0.000000                                                                                                                                                                                                                                                                                                                                                                                                                                                                                                                                                                                                                                                                                                                                                                                                                                                                                                                                                                                                                                                                                                                                                                                                                                                                                                                                                                                                                                                                                                                                                                                                                                                                                                                          |          |          |          |          |   |   |      |          |  |  |  |  |      |          |          |  |  |  |      |          |          |          |  |  |      |          |          |          |          |  |      |          |          |          |          |          |     |          |          |          |          |          |      |          |          |          |          |          |     |          |          |          |          |          |     |          |          |          |          |          |      |          |          |          |          |          |  |   |   |   |   |    |     |          |  |  |  |  |      |          |          |  |  |  |     |          |          |          |  |  |     |          |          |          |          |  |      |          |          |          |          |          |
| 2 B                                                                                                                                  | 2.160523                                                                                                                                                                                                                                                                                                                                                                                                                                                                                                                                                                                                                                                                                                                                                                                                                                                                                                                                                                                                                                                                                                                                                                                                                                                                                                                                                                                                                                                                                                                                                                                                                                                                                                                          | 0.000000 |          |          |          |   |   |      |          |  |  |  |  |      |          |          |  |  |  |      |          |          |          |  |  |      |          |          |          |          |  |      |          |          |          |          |          |     |          |          |          |          |          |      |          |          |          |          |          |     |          |          |          |          |          |     |          |          |          |          |          |      |          |          |          |          |          |  |   |   |   |   |    |     |          |  |  |  |  |      |          |          |  |  |  |     |          |          |          |  |  |     |          |          |          |          |  |      |          |          |          |          |          |
| 3 B                                                                                                                                  | 2.262311                                                                                                                                                                                                                                                                                                                                                                                                                                                                                                                                                                                                                                                                                                                                                                                                                                                                                                                                                                                                                                                                                                                                                                                                                                                                                                                                                                                                                                                                                                                                                                                                                                                                                                                          | 3.123990 | 0.000000 |          |          |   |   |      |          |  |  |  |  |      |          |          |  |  |  |      |          |          |          |  |  |      |          |          |          |          |  |      |          |          |          |          |          |     |          |          |          |          |          |      |          |          |          |          |          |     |          |          |          |          |          |     |          |          |          |          |          |      |          |          |          |          |          |  |   |   |   |   |    |     |          |  |  |  |  |      |          |          |  |  |  |     |          |          |          |  |  |     |          |          |          |          |  |      |          |          |          |          |          |
| 4 B                                                                                                                                  | 2.281782                                                                                                                                                                                                                                                                                                                                                                                                                                                                                                                                                                                                                                                                                                                                                                                                                                                                                                                                                                                                                                                                                                                                                                                                                                                                                                                                                                                                                                                                                                                                                                                                                                                                                                                          | 3.211842 | 3.394711 | 0.000000 |          |   |   |      |          |  |  |  |  |      |          |          |  |  |  |      |          |          |          |  |  |      |          |          |          |          |  |      |          |          |          |          |          |     |          |          |          |          |          |      |          |          |          |          |          |     |          |          |          |          |          |     |          |          |          |          |          |      |          |          |          |          |          |  |   |   |   |   |    |     |          |  |  |  |  |      |          |          |  |  |  |     |          |          |          |  |  |     |          |          |          |          |  |      |          |          |          |          |          |
| 5 Re                                                                                                                                 | 2.863951                                                                                                                                                                                                                                                                                                                                                                                                                                                                                                                                                                                                                                                                                                                                                                                                                                                                                                                                                                                                                                                                                                                                                                                                                                                                                                                                                                                                                                                                                                                                                                                                                                                                                                                          | 3.961513 | 2.146200 | 2.274477 | 0.000000 |   |   |      |          |  |  |  |  |      |          |          |  |  |  |      |          |          |          |  |  |      |          |          |          |          |  |      |          |          |          |          |          |     |          |          |          |          |          |      |          |          |          |          |          |     |          |          |          |          |          |     |          |          |          |          |          |      |          |          |          |          |          |  |   |   |   |   |    |     |          |  |  |  |  |      |          |          |  |  |  |     |          |          |          |  |  |     |          |          |          |          |  |      |          |          |          |          |          |
| 6 B                                                                                                                                  | 2.273287                                                                                                                                                                                                                                                                                                                                                                                                                                                                                                                                                                                                                                                                                                                                                                                                                                                                                                                                                                                                                                                                                                                                                                                                                                                                                                                                                                                                                                                                                                                                                                                                                                                                                                                          | 1.803939 | 3.436530 | 1.738127 | 3.164677 |   |   |      |          |  |  |  |  |      |          |          |  |  |  |      |          |          |          |  |  |      |          |          |          |          |  |      |          |          |          |          |          |     |          |          |          |          |          |      |          |          |          |          |          |     |          |          |          |          |          |     |          |          |          |          |          |      |          |          |          |          |          |  |   |   |   |   |    |     |          |  |  |  |  |      |          |          |  |  |  |     |          |          |          |  |  |     |          |          |          |          |  |      |          |          |          |          |          |
| 7 Re                                                                                                                                 | 2.845802                                                                                                                                                                                                                                                                                                                                                                                                                                                                                                                                                                                                                                                                                                                                                                                                                                                                                                                                                                                                                                                                                                                                                                                                                                                                                                                                                                                                                                                                                                                                                                                                                                                                                                                          | 2.087522 | 2.255843 | 3.145486 | 2.775816 |   |   |      |          |  |  |  |  |      |          |          |  |  |  |      |          |          |          |  |  |      |          |          |          |          |  |      |          |          |          |          |          |     |          |          |          |          |          |      |          |          |          |          |          |     |          |          |          |          |          |     |          |          |          |          |          |      |          |          |          |          |          |  |   |   |   |   |    |     |          |  |  |  |  |      |          |          |  |  |  |     |          |          |          |  |  |     |          |          |          |          |  |      |          |          |          |          |          |
| 8 B                                                                                                                                  | 2.346307                                                                                                                                                                                                                                                                                                                                                                                                                                                                                                                                                                                                                                                                                                                                                                                                                                                                                                                                                                                                                                                                                                                                                                                                                                                                                                                                                                                                                                                                                                                                                                                                                                                                                                                          | 4.170559 | 3.074363 | 1.774152 | 1.989075 |   |   |      |          |  |  |  |  |      |          |          |  |  |  |      |          |          |          |  |  |      |          |          |          |          |  |      |          |          |          |          |          |     |          |          |          |          |          |      |          |          |          |          |          |     |          |          |          |          |          |     |          |          |          |          |          |      |          |          |          |          |          |  |   |   |   |   |    |     |          |  |  |  |  |      |          |          |  |  |  |     |          |          |          |  |  |     |          |          |          |          |  |      |          |          |          |          |          |
| 9 B                                                                                                                                  | 2.176930                                                                                                                                                                                                                                                                                                                                                                                                                                                                                                                                                                                                                                                                                                                                                                                                                                                                                                                                                                                                                                                                                                                                                                                                                                                                                                                                                                                                                                                                                                                                                                                                                                                                                                                          | 1.936672 | 1.769711 | 3.887929 | 3.549538 |   |   |      |          |  |  |  |  |      |          |          |  |  |  |      |          |          |          |  |  |      |          |          |          |          |  |      |          |          |          |          |          |     |          |          |          |          |          |      |          |          |          |          |          |     |          |          |          |          |          |     |          |          |          |          |          |      |          |          |          |          |          |  |   |   |   |   |    |     |          |  |  |  |  |      |          |          |  |  |  |     |          |          |          |  |  |     |          |          |          |          |  |      |          |          |          |          |          |
| 10 B                                                                                                                                 | 3.176195                                                                                                                                                                                                                                                                                                                                                                                                                                                                                                                                                                                                                                                                                                                                                                                                                                                                                                                                                                                                                                                                                                                                                                                                                                                                                                                                                                                                                                                                                                                                                                                                                                                                                                                          | 3.193111 | 3.337712 | 1.743665 | 2.167266 |   |   |      |          |  |  |  |  |      |          |          |  |  |  |      |          |          |          |  |  |      |          |          |          |          |  |      |          |          |          |          |          |     |          |          |          |          |          |      |          |          |          |          |          |     |          |          |          |          |          |     |          |          |          |          |          |      |          |          |          |          |          |  |   |   |   |   |    |     |          |  |  |  |  |      |          |          |  |  |  |     |          |          |          |  |  |     |          |          |          |          |  |      |          |          |          |          |          |
|                                                                                                                                      | 6                                                                                                                                                                                                                                                                                                                                                                                                                                                                                                                                                                                                                                                                                                                                                                                                                                                                                                                                                                                                                                                                                                                                                                                                                                                                                                                                                                                                                                                                                                                                                                                                                                                                                                                                 | 7        | 8        | 9        | 10       |   |   |      |          |  |  |  |  |      |          |          |  |  |  |      |          |          |          |  |  |      |          |          |          |          |  |      |          |          |          |          |          |     |          |          |          |          |          |      |          |          |          |          |          |     |          |          |          |          |          |     |          |          |          |          |          |      |          |          |          |          |          |  |   |   |   |   |    |     |          |  |  |  |  |      |          |          |  |  |  |     |          |          |          |  |  |     |          |          |          |          |  |      |          |          |          |          |          |
| 6 B                                                                                                                                  | 0.000000                                                                                                                                                                                                                                                                                                                                                                                                                                                                                                                                                                                                                                                                                                                                                                                                                                                                                                                                                                                                                                                                                                                                                                                                                                                                                                                                                                                                                                                                                                                                                                                                                                                                                                                          |          |          |          |          |   |   |      |          |  |  |  |  |      |          |          |  |  |  |      |          |          |          |  |  |      |          |          |          |          |  |      |          |          |          |          |          |     |          |          |          |          |          |      |          |          |          |          |          |     |          |          |          |          |          |     |          |          |          |          |          |      |          |          |          |          |          |  |   |   |   |   |    |     |          |  |  |  |  |      |          |          |  |  |  |     |          |          |          |  |  |     |          |          |          |          |  |      |          |          |          |          |          |
| 7 Re                                                                                                                                 | 2.255398                                                                                                                                                                                                                                                                                                                                                                                                                                                                                                                                                                                                                                                                                                                                                                                                                                                                                                                                                                                                                                                                                                                                                                                                                                                                                                                                                                                                                                                                                                                                                                                                                                                                                                                          | 0.000000 |          |          |          |   |   |      |          |  |  |  |  |      |          |          |  |  |  |      |          |          |          |  |  |      |          |          |          |          |  |      |          |          |          |          |          |     |          |          |          |          |          |      |          |          |          |          |          |     |          |          |          |          |          |     |          |          |          |          |          |      |          |          |          |          |          |  |   |   |   |   |    |     |          |  |  |  |  |      |          |          |  |  |  |     |          |          |          |  |  |     |          |          |          |          |  |      |          |          |          |          |          |
| 8 B                                                                                                                                  | 3.250935                                                                                                                                                                                                                                                                                                                                                                                                                                                                                                                                                                                                                                                                                                                                                                                                                                                                                                                                                                                                                                                                                                                                                                                                                                                                                                                                                                                                                                                                                                                                                                                                                                                                                                                          | 3.968270 | 0.000000 |          |          |   |   |      |          |  |  |  |  |      |          |          |  |  |  |      |          |          |          |  |  |      |          |          |          |          |  |      |          |          |          |          |          |     |          |          |          |          |          |      |          |          |          |          |          |     |          |          |          |          |          |     |          |          |          |          |          |      |          |          |          |          |          |  |   |   |   |   |    |     |          |  |  |  |  |      |          |          |  |  |  |     |          |          |          |  |  |     |          |          |          |          |  |      |          |          |          |          |          |
| 9 B                                                                                                                                  | 3.152189                                                                                                                                                                                                                                                                                                                                                                                                                                                                                                                                                                                                                                                                                                                                                                                                                                                                                                                                                                                                                                                                                                                                                                                                                                                                                                                                                                                                                                                                                                                                                                                                                                                                                                                          | 2.083805 | 4.098102 | 0.000000 |          |   |   |      |          |  |  |  |  |      |          |          |  |  |  |      |          |          |          |  |  |      |          |          |          |          |  |      |          |          |          |          |          |     |          |          |          |          |          |      |          |          |          |          |          |     |          |          |          |          |          |     |          |          |          |          |          |      |          |          |          |          |          |  |   |   |   |   |    |     |          |  |  |  |  |      |          |          |  |  |  |     |          |          |          |  |  |     |          |          |          |          |  |      |          |          |          |          |          |
| 10 B                                                                                                                                 | 1.789544                                                                                                                                                                                                                                                                                                                                                                                                                                                                                                                                                                                                                                                                                                                                                                                                                                                                                                                                                                                                                                                                                                                                                                                                                                                                                                                                                                                                                                                                                                                                                                                                                                                                                                                          | 2.205435 | 3.058202 | 3.821907 | 0.000000 |   |   |      |          |  |  |  |  |      |          |          |  |  |  |      |          |          |          |  |  |      |          |          |          |          |  |      |          |          |          |          |          |     |          |          |          |          |          |      |          |          |          |          |          |     |          |          |          |          |          |     |          |          |          |          |          |      |          |          |          |          |          |  |   |   |   |   |    |     |          |  |  |  |  |      |          |          |  |  |  |     |          |          |          |  |  |     |          |          |          |          |  |      |          |          |          |          |          |

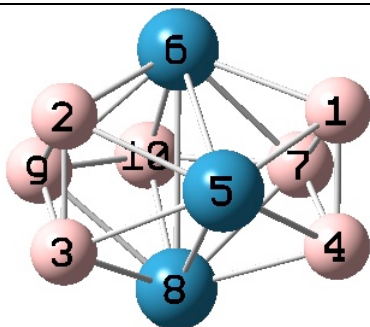

3. -993.90842290 +12.2 C<sub>2v</sub>

|      | 1        | 2        | 3        | 4        | 5        |
|------|----------|----------|----------|----------|----------|
| 1 B  | 0.000000 |          |          |          |          |
| 2 B  | 3.523924 | 0.000000 |          |          |          |
| 3 B  | 3.906581 | 1.689296 | 0.000000 |          |          |
| 4 B  | 1.692817 | 3.903757 | 3.516159 | 0.000000 |          |
| 5 Re | 2.241583 | 2.241636 | 2.229331 | 2.226142 | 0.000000 |
| 6 Re | 2.205721 | 2.204367 | 3.163735 | 3.165105 | 2.705870 |
| 7 B  | 1.731179 | 3.852697 | 3.860508 | 1.753993 | 3.102503 |
| 8 Re | 3.118372 | 3.117207 | 2.189609 | 2.187112 | 2.661997 |
| 9 B  | 3.852470 | 1.732784 | 1.751734 | 3.856761 | 3.102897 |
| 10 B | 3.229763 | 3.233223 | 3.265786 | 3.261799 | 3.681939 |
|      | 6        | 7        | 8        | 9        | 10       |
| 6 Re | 0.000000 |          |          |          |          |
| 7 B  | 2.289063 | 0.000000 |          |          |          |
| 8 Re | 2.981328 | 2.268117 | 0.000000 |          |          |
| 9 B  | 2.288046 | 3.360640 | 2.265206 | 0.000000 |          |
| 10 B | 2.063532 | 1.992234 | 2.095371 | 1.996137 | 0.000000 |

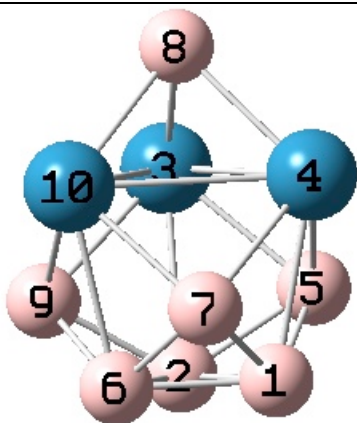

4. -993.88085070 +29.5 C<sub>3v</sub>

|       | 1        | 2        | 3        | 4        | 5        |
|-------|----------|----------|----------|----------|----------|
| 1 B   | 0.000000 |          |          |          |          |
| 2 B   | 1.793707 | 0.000000 |          |          |          |
| 3 Re  | 3.221556 | 2.341923 | 0.000000 |          |          |
| 4 Re  | 2.342133 | 3.215569 | 2.717327 | 0.000000 |          |
| 5 B   | 1.776851 | 1.773096 | 2.158090 | 2.152787 | 0.000000 |
| 6 B   | 1.793603 | 1.793252 | 3.217611 | 3.219244 | 2.929103 |
| 7 B   | 1.773972 | 2.927410 | 3.585357 | 2.154740 | 3.025912 |
| 8 B   | 3.877370 | 3.873749 | 2.137068 | 2.142288 | 3.320499 |
| 9 B   | 2.931183 | 1.778174 | 2.154953 | 3.587891 | 3.029617 |
| 10 Re | 3.220894 | 3.220093 | 2.715968 | 2.719532 | 3.589238 |
|       | 6        | 7        | 8        | 9        | 10       |
| 6 B   | 0.000000 |          |          |          |          |
| 7 B   | 1.775690 | 0.000000 |          |          |          |
| 8 B   | 3.874689 | 3.317216 | 0.000000 |          |          |
| 9 B   | 1.773822 | 3.025222 | 3.316749 | 0.000000 |          |
| 10 Re | 2.344486 | 2.154879 | 2.136173 | 2.154722 | 0.000000 |



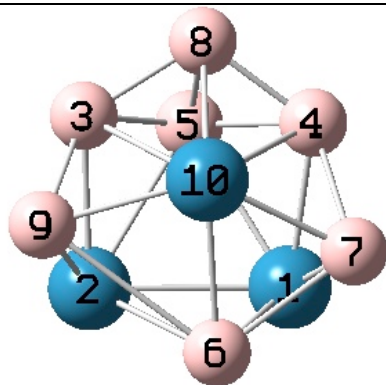

5. -993.87042250 +36.1 C<sub>1</sub>

|       | 1        | 2        | 3        | 4        | 5        |  |
|-------|----------|----------|----------|----------|----------|--|
| 1 Re  | 0.000000 |          |          |          |          |  |
| 2 Re  | 2.472832 | 0.000000 |          |          |          |  |
| 3 B   | 3.431158 | 2.208461 | 0.000000 |          |          |  |
| 4 B   | 2.181211 | 3.425231 | 2.813181 | 0.000000 |          |  |
| 5 B   | 2.336855 | 2.408517 | 1.808981 | 1.835773 | 0.000000 |  |
| 6 B   | 2.160325 | 2.254794 | 3.392447 | 3.185677 | 3.445644 |  |
| 7 B   | 2.029525 | 3.569007 | 3.769104 | 1.920972 | 3.250948 |  |
| 8 B   | 3.380750 | 3.404630 | 1.718506 | 1.707148 | 1.725448 |  |
| 9 B   | 3.803032 | 2.053567 | 1.815572 | 3.785434 | 3.233280 |  |
| 10 Re | 3.094324 | 2.978010 | 2.312201 | 2.320267 | 2.921227 |  |
|       | 6        | 7        | 8        | 9        | 10       |  |
| 6 B   | 0.000000 |          |          |          |          |  |
| 7 B   | 2.075904 | 0.000000 |          |          |          |  |
| 8 B   | 3.839656 | 3.215830 | 0.000000 |          |          |  |
| 9 B   | 2.666481 | 3.836105 | 3.136553 | 0.000000 |          |  |
| 10 Re | 2.256303 | 2.145840 | 2.220320 | 2.131146 | 0.000000 |  |

Table S6C. Energy ranking for all of the Cp<sub>3</sub>Re<sub>3</sub>B<sub>7</sub>H<sub>7</sub> optimized structures after B3LYP/6-31G(d) optimizations:

| No. | Structure                      | Final energy (a.u.) | ΔE (kcal/mol) |
|-----|--------------------------------|---------------------|---------------|
| 1   | 10v-02-TetrTriPri2__Re ag r-37 | -993.62352740       | 0.00          |
| 2   | 10v-02-TetrTriPri2__Re ak r-37 | -993.62352700       | 0.00          |
| 3   | 10v-03-Isocloso 27_r-31        | -993.62337180       | 0.10          |
| 4   | 10v-02-TetrTriPri2__Re ag i-37 | -993.62234100       | 0.74          |
| 5   | 10v-02-TetrTriPri2__Re ak i-37 | -993.62234100       | 0.74          |
| 6   | 10v-03-Isocloso 27_i-31        | -993.62051640       | 1.89          |
| 7   | 10v-01-TetrTriPri1__Re f       | -993.60521370       | 11.49         |
| 8   | 10v-03-Isocloso 17_r-13        | -993.59311400       | 19.09         |
| 9   | 10v-03-Isocloso 17_i-13        | -993.59273950       | 19.32         |
| 10  | 10v-03-Isocloso 28_r-33        | -993.57917620       | 27.83         |
| 11  | 10v-02-TetrTriPri2__Re af r-22 | -993.57894220       | 27.98         |
| 12  | 10v-02-TetrTriPri2__Re af i-22 | -993.57853550       | 28.23         |
| 13  | 10v-03-Isocloso 28_i-33        | -993.57750480       | 28.88         |
| 14  | 10v-03-Isocloso 3_r-31         | -993.56638030       | 35.86         |
| 15  | 10v-03-Isocloso 10_r-31        | -993.56638000       | 35.86         |
| 16  | 10v-03-Isocloso 21_r-42        | -993.56620920       | 35.97         |
| 17  | 10v-03-Isocloso 22_r-42        | -993.56620920       | 35.97         |
| 18  | 10v-03-Isocloso 3_i-31         | -993.56620870       | 35.97         |
| 19  | 10v-03-Isocloso 10_i-31        | -993.56620770       | 35.97         |
| 20  | 10v-02-TetrTriPri2__Re as      | -993.56610260       | 36.04         |
| 21  | 10v-02-TetrTriPri2__Re i       | -993.56610260       | 36.04         |
| 22  | 10v-03-Isocloso 1              | -993.56609870       | 36.04         |
| 23  | 10v-03-Isocloso 36             | -993.56609580       | 36.04         |
| 24  | 10v-03-Isocloso 21_i-42        | -993.56483350       | 36.83         |
| 25  | 10v-03-Isocloso 22_i-42        | -993.56483350       | 36.83         |
| 26  | 10v-03-Isocloso 14_r-37        | -993.56455990       | 37.00         |
| 27  | 10v-02-TetrTriPri2__Re l       | -993.56443350       | 37.08         |
| 28  | 10v-02-TetrTriPri2__Re ae      | -993.56440390       | 37.10         |
| 29  | 10v-02-TetrTriPri2__Re ar      | -993.56440300       | 37.10         |
| 30  | 10v-03-Isocloso 7_i-23         | -993.56343700       | 37.71         |
| 31  | 10v-03-Isocloso 6              | -993.56332810       | 37.78         |
| 32  | 10v-03-Isocloso 7_r-23         | -993.56322510       | 37.84         |
| 33  | 10v-02-TetrTriPri2__Re b       | -993.56320550       | 37.85         |
| 34  | 10v-02-TetrTriPri2__Re aa      | -993.56320450       | 37.85         |
| 35  | 10v-02-TetrTriPri2__Re ai i-12 | -993.56167730       | 38.81         |
| 36  | 10v-03-Isocloso 30             | -993.56164140       | 38.83         |
| 37  | 10v-03-Isocloso 2              | -993.56161060       | 38.85         |

|    |                                  |               |       |
|----|----------------------------------|---------------|-------|
| 38 | 10v-02-TetrcTriPri2__Re ai r-12  | -993.56155710 | 38.89 |
| 39 | 10v-02-TetrcTriPri2__Re y        | -993.55515410 | 42.91 |
| 40 | 10v-03-Isocloso 12               | -993.55514740 | 42.91 |
| 41 | 10v-01-TetrcTriPri1__Re c        | -993.55378760 | 43.76 |
| 42 | 10v-02-TetrcTriPri2__Re ac       | -993.55234560 | 44.67 |
| 43 | 10v-02-TetrcTriPri2__Re v        | -993.55234560 | 44.67 |
| 44 | 10v-03-Isocloso 15               | -993.55230550 | 44.69 |
| 45 | 10v-03-Isocloso 16               | -993.55230360 | 44.69 |
| 46 | 10v-01-TetrcTriPri1__Re a        | -993.55076750 | 45.66 |
| 47 | 10v-03-Isocloso 8                | -993.55076590 | 45.66 |
| 48 | 10v-03-Isocloso 9                | -993.55076360 | 45.66 |
| 49 | 10v-03-Isocloso 11               | -993.55076180 | 45.66 |
| 50 | 10v-03-Isocloso 5                | -993.55076170 | 45.66 |
| 51 | 10v-03-Isocloso 4                | -993.55076130 | 45.66 |
| 52 | 10v-03-Isocloso 29               | -993.55075900 | 45.66 |
| 53 | 10v-01-TetrcTriPri1__Re b        | -993.55075560 | 45.67 |
| 54 | 10v-01-TetrcTriPri1__Re h        | -993.54957190 | 46.41 |
| 55 | 10v-01-TetrcTriPri1__Re n        | -993.54850460 | 47.08 |
| 56 | 10v-02-TetrcTriPri2__Re am       | -993.54570580 | 48.83 |
| 57 | 10v-02-TetrcTriPri2__Re ax       | -993.54570580 | 48.83 |
| 58 | 10v-02-TetrcTriPri2__Re e        | -993.54570580 | 48.83 |
| 59 | 10v-01-TetrcTriPri1__Re j        | -993.54226390 | 50.99 |
| 60 | 10v-04-closo c Re                | -993.54106830 | 51.74 |
| 61 | 10v-02-TetrcTriPri2__Re u        | -993.53778670 | 53.80 |
| 62 | 10v-02-TetrcTriPri2__Re ab       | -993.53778380 | 53.81 |
| 63 | 10v-01-TetrcTriPri1__Re m        | -993.53642890 | 54.66 |
| 64 | 10v-01-TetrcTriPri1__Re i        | -993.53640900 | 54.67 |
| 65 | 10v-02-TetrcTriPri2__Re a r-17   | -993.53515460 | 55.46 |
| 66 | 10v-02-TetrcTriPri2__Re a i-17   | -993.53513990 | 55.46 |
| 67 | 10v-01-TetrcTriPri1__Re g        | -993.53452930 | 55.85 |
| 68 | 10v-02-TetrcTriPri2__Re al r-25  | -993.53341960 | 56.54 |
| 69 | 10v-02-TetrcTriPri2__Re aj r-25  | -993.53341950 | 56.54 |
| 70 | 10v-02-TetrcTriPri2__Re al i-25  | -993.53330760 | 56.61 |
| 71 | 10v-02-TetrcTriPri2__Re aj i-25  | -993.53330380 | 56.62 |
| 72 | 10v-03-Isocloso 13_i-13          | -993.53181220 | 57.55 |
| 73 | 10v-03-Isocloso 13_r-13          | -993.53173220 | 57.60 |
| 74 | 10v-01-TetrcTriPri1__Re d        | -993.53004740 | 58.66 |
| 75 | 10v-02-TetrcTriPri2__Re h        | -993.52984810 | 58.79 |
| 76 | 10v-02-TetrcTriPri2__Re ah       | -993.52984710 | 58.79 |
| 77 | 10v-02-TetrcTriPri2__Re at       | -993.52984340 | 58.79 |
| 78 | 10v-02-TetrcTriPri2__Re ba r-178 | -993.52704050 | 60.55 |

|     |                                 |               |       |
|-----|---------------------------------|---------------|-------|
| 79  | 10v-02-TetrTriPri2__Re k r-178  | -993.52703670 | 60.55 |
| 80  | 10v-03-Isocloso 31              | -993.52637050 | 60.97 |
| 81  | 10v-02-TetrTriPri2__Re c r-80   | -993.52584320 | 61.30 |
| 82  | 10v-04-closo a Re               | -993.52566780 | 61.41 |
| 83  | 10v-02-TetrTriPri2__Re g r-25   | -993.52557160 | 61.47 |
| 84  | 10v-03-Isocloso 23_r-25         | -993.52556790 | 61.47 |
| 85  | 10v-02-TetrTriPri2__Re az r-25  | -993.52553700 | 61.49 |
| 86  | 10v-03-Isocloso 23_i-25         | -993.52531360 | 61.63 |
| 87  | 10v-02-TetrTriPri2__Re az i-25  | -993.52531150 | 61.63 |
| 88  | 10v-02-TetrTriPri2__Re g i-25   | -993.52530870 | 61.63 |
| 89  | 10v-02-TetrTriPri2__Re av       | -993.52464080 | 62.05 |
| 90  | 10v-02-TetrTriPri2__Re j        | -993.52464080 | 62.05 |
| 91  | 10v-02-TetrTriPri2__Re r        | -993.52464080 | 62.05 |
| 92  | 10v-03-Isocloso 24              | -993.52448350 | 62.15 |
| 93  | 10v-03-Isocloso 18_r-16         | -993.52420610 | 62.33 |
| 94  | 10v-02-TetrTriPri2__Re q        | -993.52364970 | 62.68 |
| 95  | 10v-03-Isocloso 18_i-16         | -993.52315180 | 62.99 |
| 96  | 10v-03-Isocloso 19              | -993.52028750 | 64.79 |
| 97  | 10v-02-TetrTriPri2__Re z        | -993.51962510 | 65.20 |
| 98  | 10v-02-TetrTriPri2__Re ad       | -993.51718000 | 66.74 |
| 99  | 10v-03-Isocloso 33              | -993.51716030 | 66.75 |
| 100 | 10v-03-Isocloso 34              | -993.51715840 | 66.75 |
| 101 | 10v-02-TetrTriPri2__Re ay       | -993.51627780 | 67.30 |
| 102 | 10v-02-TetrTriPri2__Re f        | -993.51627470 | 67.30 |
| 103 | 10v-01-TetrTriPri1__Re k i-20   | -993.51600340 | 67.47 |
| 104 | 10v-01-TetrTriPri1__Re k r-20   | -993.51589020 | 67.54 |
| 105 | 10v-02-TetrTriPri2__Re k i-178  | -993.51534170 | 67.89 |
| 106 | 10v-02-TetrTriPri2__Re ba i-178 | -993.51534160 | 67.89 |
| 107 | 10v-02-TetrTriPri2__Re d        | -993.51307910 | 69.31 |
| 108 | 10v-02-TetrTriPri2__Re an r-10  | -993.51263510 | 69.59 |
| 109 | 10v-01-TetrTriPri1__Re e        | -993.50878800 | 72.00 |
| 110 | 10v-02-TetrTriPri2__Re w        | -993.50844970 | 72.21 |
| 111 | 10v-02-TetrTriPri2__Re an i-10  | -993.50551250 | 74.06 |
| 112 | 10v-03-Isocloso 32_r-263        | -993.50359840 | 75.26 |
| 113 | 10v-04-closo e Re               | -993.49814990 | 78.68 |
| 114 | 10v-03-Isocloso 35              | -993.49717510 | 79.29 |
| 115 | 10v-03-Isocloso 37              | -993.49701120 | 79.39 |
| 116 | 10v-03-Isocloso 14_i-37         | -993.49696670 | 79.42 |
| 117 | 10v-03-Isocloso 25              | -993.49465740 | 80.87 |
| 118 | 10v-04-closo d Re               | -993.49465440 | 80.87 |
| 119 | 10v-02-TetrTriPri2__Re ao       | -993.49271760 | 82.09 |

|     |                               |               |        |
|-----|-------------------------------|---------------|--------|
| 120 | 10v-02-TetrTriPri2__Re x      | -993.49271760 | 82.09  |
| 121 | 10v-01-TetrTriPri1__Re o      | -993.48966300 | 84.00  |
| 122 | 10v-03-Isocloso 20            | -993.48887240 | 84.50  |
| 123 | 10v-04-closo b Re __r-996     | -993.48642850 | 86.03  |
| 124 | 10v-03-Isocloso 26            | -993.48642480 | 86.03  |
| 125 | 10v-02-TetrTriPri2__Re au     | -993.48517720 | 86.82  |
| 126 | 10v-02-TetrTriPri2__Re m      | -993.48517560 | 86.82  |
| 127 | 10v-01-TetrTriPri1__Re l      | -993.47194060 | 95.12  |
| 128 | 10v-02-TetrTriPri2__Re o      | -993.46317500 | 100.62 |
| 129 | 10v-04-closo b Re __i-996     | -993.46268830 | 100.93 |
| 130 | 10v-03-Isocloso 32_i-263      | -993.46201020 | 101.36 |
| 131 | 10v-02-TetrTriPri2__Re s      | -993.45740510 | 104.25 |
| 132 | 10v-02-TetrTriPri2__Re n      | -993.45740020 | 104.25 |
| 133 | 10v-02-TetrTriPri2__Re aq     | -993.45740010 | 104.25 |
| 134 | 10v-02-TetrTriPri2__Re c i-80 | -993.45023150 | 108.75 |
| 135 | 10v-02-TetrTriPri2__Re p      | -993.44435130 | 112.44 |
| 136 | 10v-02-TetrTriPri2__Re ap     | -993.44434830 | 112.44 |
| 137 | 10v-02-TetrTriPri2__Re aw     | -993.44120950 | 114.41 |
| 138 | 10v-02-TetrTriPri2__Re t      | -993.43644150 | 117.40 |

Table S7A. Initial  $\text{Cp}_3\text{Re}_3\text{B}_8\text{H}_8$  structures, 215 structures.

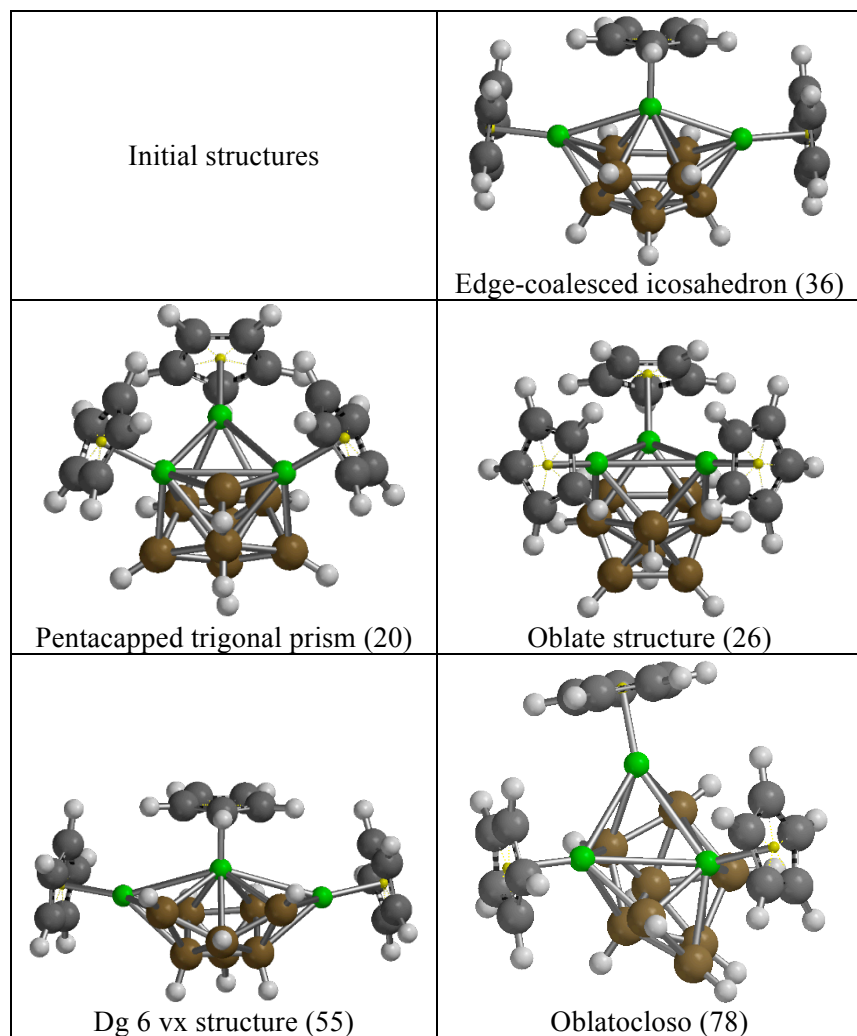

Table S7B. Distance table for the lowest-lying  $\text{Cp}_3\text{Re}_3\text{B}_8\text{H}_8$  structures after M06L/6-311G(d,p) optimization. Included are the ZPcorrected E (a.u.), relative energy (kcal/mol) and symmetry. For clarity only the atoms forming the cluster framework are presented.

| 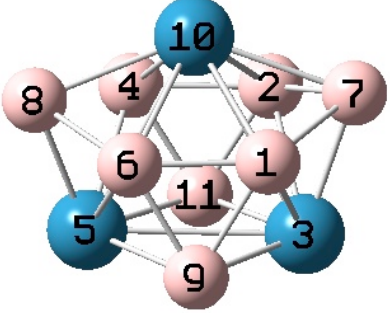 <p>1. -1019.4058055 0.0 C1</p>     | <table border="1"> <thead> <tr> <th></th> <th>1</th> <th>2</th> <th>3</th> <th>4</th> <th>5</th> </tr> </thead> <tbody> <tr><td>1 B</td><td>0.000000</td><td></td><td></td><td></td><td></td></tr> <tr><td>2 B</td><td>3.344371</td><td>0.000000</td><td></td><td></td><td></td></tr> <tr><td>3 Re</td><td>2.262667</td><td>2.263315</td><td>0.000000</td><td></td><td></td></tr> <tr><td>4 B</td><td>3.809771</td><td>1.773018</td><td>3.151387</td><td>0.000000</td><td></td></tr> <tr><td>5 Re</td><td>3.171308</td><td>3.191434</td><td>2.763621</td><td>2.280155</td><td>0.000000</td></tr> <tr><td>6 B</td><td>1.756380</td><td>3.850220</td><td>3.161560</td><td>3.455151</td><td>2.288624</td></tr> <tr><td>7 B</td><td>1.961448</td><td>2.119578</td><td>2.004692</td><td>3.401889</td><td>3.865314</td></tr> <tr><td>8 B</td><td>3.244271</td><td>3.688570</td><td>3.944897</td><td>2.514043</td><td>2.012229</td></tr> <tr><td>9 B</td><td>1.773125</td><td>3.819351</td><td>2.186034</td><td>3.829998</td><td>2.201044</td></tr> <tr><td>10 Re</td><td>2.245429</td><td>2.255283</td><td>2.973524</td><td>2.224461</td><td>2.903772</td></tr> <tr><td>11 B</td><td>3.817648</td><td>1.716184</td><td>2.200495</td><td>1.696105</td><td>2.257094</td></tr> <tr> <td></td> <td>6</td> <td>7</td> <td>8</td> <td>9</td> <td>10</td> </tr> <tr><td>6 B</td><td>0.000000</td><td></td><td></td><td></td><td></td></tr> <tr><td>7 B</td><td>3.317290</td><td>0.000000</td><td></td><td></td><td></td></tr> <tr><td>8 B</td><td>1.840261</td><td>4.073648</td><td>0.000000</td><td></td><td></td></tr> <tr><td>9 B</td><td>1.721151</td><td>3.229441</td><td>3.113344</td><td>0.000000</td><td></td></tr> <tr><td>10 Re</td><td>2.257571</td><td>2.162708</td><td>2.191676</td><td>3.179743</td><td>0.000000</td></tr> <tr><td>11 B</td><td>3.874002</td><td>3.303085</td><td>3.574782</td><td>3.450022</td><td>3.151471</td></tr> </tbody> </table>  |          | 1        | 2        | 3        | 4 | 5 | 1 B | 0.000000 |  |  |  |  | 2 B  | 3.344371 | 0.000000 |  |  |  | 3 Re | 2.262667 | 2.263315 | 0.000000 |  |  | 4 B | 3.809771 | 1.773018 | 3.151387 | 0.000000 |  | 5 Re | 3.171308 | 3.191434 | 2.763621 | 2.280155 | 0.000000 | 6 B | 1.756380 | 3.850220 | 3.161560 | 3.455151 | 2.288624 | 7 B  | 1.961448 | 2.119578 | 2.004692 | 3.401889 | 3.865314 | 8 B  | 3.244271 | 3.688570 | 3.944897 | 2.514043 | 2.012229 | 9 B | 1.773125 | 3.819351 | 2.186034 | 3.829998 | 2.201044 | 10 Re | 2.245429 | 2.255283 | 2.973524 | 2.224461 | 2.903772 | 11 B | 3.817648 | 1.716184 | 2.200495 | 1.696105 | 2.257094 |  | 6 | 7 | 8 | 9 | 10 | 6 B | 0.000000 |  |  |  |  | 7 B  | 3.317290 | 0.000000 |  |  |  | 8 B  | 1.840261 | 4.073648 | 0.000000 |  |  | 9 B | 1.721151 | 3.229441 | 3.113344 | 0.000000 |  | 10 Re | 2.257571 | 2.162708 | 2.191676 | 3.179743 | 0.000000 | 11 B | 3.874002 | 3.303085 | 3.574782 | 3.450022 | 3.151471 |
|----------------------------------------------------------------------------------------------------------------------|------------------------------------------------------------------------------------------------------------------------------------------------------------------------------------------------------------------------------------------------------------------------------------------------------------------------------------------------------------------------------------------------------------------------------------------------------------------------------------------------------------------------------------------------------------------------------------------------------------------------------------------------------------------------------------------------------------------------------------------------------------------------------------------------------------------------------------------------------------------------------------------------------------------------------------------------------------------------------------------------------------------------------------------------------------------------------------------------------------------------------------------------------------------------------------------------------------------------------------------------------------------------------------------------------------------------------------------------------------------------------------------------------------------------------------------------------------------------------------------------------------------------------------------------------------------------------------------------------------------------------------------------------------------------------------------------------------------------------------------------------------------------------------------------------------------------------------------------------------------------------------------------------------------------------------------------------------|----------|----------|----------|----------|---|---|-----|----------|--|--|--|--|------|----------|----------|--|--|--|------|----------|----------|----------|--|--|-----|----------|----------|----------|----------|--|------|----------|----------|----------|----------|----------|-----|----------|----------|----------|----------|----------|------|----------|----------|----------|----------|----------|------|----------|----------|----------|----------|----------|-----|----------|----------|----------|----------|----------|-------|----------|----------|----------|----------|----------|------|----------|----------|----------|----------|----------|--|---|---|---|---|----|-----|----------|--|--|--|--|------|----------|----------|--|--|--|------|----------|----------|----------|--|--|-----|----------|----------|----------|----------|--|-------|----------|----------|----------|----------|----------|------|----------|----------|----------|----------|----------|
|                                                                                                                      | 1                                                                                                                                                                                                                                                                                                                                                                                                                                                                                                                                                                                                                                                                                                                                                                                                                                                                                                                                                                                                                                                                                                                                                                                                                                                                                                                                                                                                                                                                                                                                                                                                                                                                                                                                                                                                                                                                                                                                                          | 2        | 3        | 4        | 5        |   |   |     |          |  |  |  |  |      |          |          |  |  |  |      |          |          |          |  |  |     |          |          |          |          |  |      |          |          |          |          |          |     |          |          |          |          |          |      |          |          |          |          |          |      |          |          |          |          |          |     |          |          |          |          |          |       |          |          |          |          |          |      |          |          |          |          |          |  |   |   |   |   |    |     |          |  |  |  |  |      |          |          |  |  |  |      |          |          |          |  |  |     |          |          |          |          |  |       |          |          |          |          |          |      |          |          |          |          |          |
| 1 B                                                                                                                  | 0.000000                                                                                                                                                                                                                                                                                                                                                                                                                                                                                                                                                                                                                                                                                                                                                                                                                                                                                                                                                                                                                                                                                                                                                                                                                                                                                                                                                                                                                                                                                                                                                                                                                                                                                                                                                                                                                                                                                                                                                   |          |          |          |          |   |   |     |          |  |  |  |  |      |          |          |  |  |  |      |          |          |          |  |  |     |          |          |          |          |  |      |          |          |          |          |          |     |          |          |          |          |          |      |          |          |          |          |          |      |          |          |          |          |          |     |          |          |          |          |          |       |          |          |          |          |          |      |          |          |          |          |          |  |   |   |   |   |    |     |          |  |  |  |  |      |          |          |  |  |  |      |          |          |          |  |  |     |          |          |          |          |  |       |          |          |          |          |          |      |          |          |          |          |          |
| 2 B                                                                                                                  | 3.344371                                                                                                                                                                                                                                                                                                                                                                                                                                                                                                                                                                                                                                                                                                                                                                                                                                                                                                                                                                                                                                                                                                                                                                                                                                                                                                                                                                                                                                                                                                                                                                                                                                                                                                                                                                                                                                                                                                                                                   | 0.000000 |          |          |          |   |   |     |          |  |  |  |  |      |          |          |  |  |  |      |          |          |          |  |  |     |          |          |          |          |  |      |          |          |          |          |          |     |          |          |          |          |          |      |          |          |          |          |          |      |          |          |          |          |          |     |          |          |          |          |          |       |          |          |          |          |          |      |          |          |          |          |          |  |   |   |   |   |    |     |          |  |  |  |  |      |          |          |  |  |  |      |          |          |          |  |  |     |          |          |          |          |  |       |          |          |          |          |          |      |          |          |          |          |          |
| 3 Re                                                                                                                 | 2.262667                                                                                                                                                                                                                                                                                                                                                                                                                                                                                                                                                                                                                                                                                                                                                                                                                                                                                                                                                                                                                                                                                                                                                                                                                                                                                                                                                                                                                                                                                                                                                                                                                                                                                                                                                                                                                                                                                                                                                   | 2.263315 | 0.000000 |          |          |   |   |     |          |  |  |  |  |      |          |          |  |  |  |      |          |          |          |  |  |     |          |          |          |          |  |      |          |          |          |          |          |     |          |          |          |          |          |      |          |          |          |          |          |      |          |          |          |          |          |     |          |          |          |          |          |       |          |          |          |          |          |      |          |          |          |          |          |  |   |   |   |   |    |     |          |  |  |  |  |      |          |          |  |  |  |      |          |          |          |  |  |     |          |          |          |          |  |       |          |          |          |          |          |      |          |          |          |          |          |
| 4 B                                                                                                                  | 3.809771                                                                                                                                                                                                                                                                                                                                                                                                                                                                                                                                                                                                                                                                                                                                                                                                                                                                                                                                                                                                                                                                                                                                                                                                                                                                                                                                                                                                                                                                                                                                                                                                                                                                                                                                                                                                                                                                                                                                                   | 1.773018 | 3.151387 | 0.000000 |          |   |   |     |          |  |  |  |  |      |          |          |  |  |  |      |          |          |          |  |  |     |          |          |          |          |  |      |          |          |          |          |          |     |          |          |          |          |          |      |          |          |          |          |          |      |          |          |          |          |          |     |          |          |          |          |          |       |          |          |          |          |          |      |          |          |          |          |          |  |   |   |   |   |    |     |          |  |  |  |  |      |          |          |  |  |  |      |          |          |          |  |  |     |          |          |          |          |  |       |          |          |          |          |          |      |          |          |          |          |          |
| 5 Re                                                                                                                 | 3.171308                                                                                                                                                                                                                                                                                                                                                                                                                                                                                                                                                                                                                                                                                                                                                                                                                                                                                                                                                                                                                                                                                                                                                                                                                                                                                                                                                                                                                                                                                                                                                                                                                                                                                                                                                                                                                                                                                                                                                   | 3.191434 | 2.763621 | 2.280155 | 0.000000 |   |   |     |          |  |  |  |  |      |          |          |  |  |  |      |          |          |          |  |  |     |          |          |          |          |  |      |          |          |          |          |          |     |          |          |          |          |          |      |          |          |          |          |          |      |          |          |          |          |          |     |          |          |          |          |          |       |          |          |          |          |          |      |          |          |          |          |          |  |   |   |   |   |    |     |          |  |  |  |  |      |          |          |  |  |  |      |          |          |          |  |  |     |          |          |          |          |  |       |          |          |          |          |          |      |          |          |          |          |          |
| 6 B                                                                                                                  | 1.756380                                                                                                                                                                                                                                                                                                                                                                                                                                                                                                                                                                                                                                                                                                                                                                                                                                                                                                                                                                                                                                                                                                                                                                                                                                                                                                                                                                                                                                                                                                                                                                                                                                                                                                                                                                                                                                                                                                                                                   | 3.850220 | 3.161560 | 3.455151 | 2.288624 |   |   |     |          |  |  |  |  |      |          |          |  |  |  |      |          |          |          |  |  |     |          |          |          |          |  |      |          |          |          |          |          |     |          |          |          |          |          |      |          |          |          |          |          |      |          |          |          |          |          |     |          |          |          |          |          |       |          |          |          |          |          |      |          |          |          |          |          |  |   |   |   |   |    |     |          |  |  |  |  |      |          |          |  |  |  |      |          |          |          |  |  |     |          |          |          |          |  |       |          |          |          |          |          |      |          |          |          |          |          |
| 7 B                                                                                                                  | 1.961448                                                                                                                                                                                                                                                                                                                                                                                                                                                                                                                                                                                                                                                                                                                                                                                                                                                                                                                                                                                                                                                                                                                                                                                                                                                                                                                                                                                                                                                                                                                                                                                                                                                                                                                                                                                                                                                                                                                                                   | 2.119578 | 2.004692 | 3.401889 | 3.865314 |   |   |     |          |  |  |  |  |      |          |          |  |  |  |      |          |          |          |  |  |     |          |          |          |          |  |      |          |          |          |          |          |     |          |          |          |          |          |      |          |          |          |          |          |      |          |          |          |          |          |     |          |          |          |          |          |       |          |          |          |          |          |      |          |          |          |          |          |  |   |   |   |   |    |     |          |  |  |  |  |      |          |          |  |  |  |      |          |          |          |  |  |     |          |          |          |          |  |       |          |          |          |          |          |      |          |          |          |          |          |
| 8 B                                                                                                                  | 3.244271                                                                                                                                                                                                                                                                                                                                                                                                                                                                                                                                                                                                                                                                                                                                                                                                                                                                                                                                                                                                                                                                                                                                                                                                                                                                                                                                                                                                                                                                                                                                                                                                                                                                                                                                                                                                                                                                                                                                                   | 3.688570 | 3.944897 | 2.514043 | 2.012229 |   |   |     |          |  |  |  |  |      |          |          |  |  |  |      |          |          |          |  |  |     |          |          |          |          |  |      |          |          |          |          |          |     |          |          |          |          |          |      |          |          |          |          |          |      |          |          |          |          |          |     |          |          |          |          |          |       |          |          |          |          |          |      |          |          |          |          |          |  |   |   |   |   |    |     |          |  |  |  |  |      |          |          |  |  |  |      |          |          |          |  |  |     |          |          |          |          |  |       |          |          |          |          |          |      |          |          |          |          |          |
| 9 B                                                                                                                  | 1.773125                                                                                                                                                                                                                                                                                                                                                                                                                                                                                                                                                                                                                                                                                                                                                                                                                                                                                                                                                                                                                                                                                                                                                                                                                                                                                                                                                                                                                                                                                                                                                                                                                                                                                                                                                                                                                                                                                                                                                   | 3.819351 | 2.186034 | 3.829998 | 2.201044 |   |   |     |          |  |  |  |  |      |          |          |  |  |  |      |          |          |          |  |  |     |          |          |          |          |  |      |          |          |          |          |          |     |          |          |          |          |          |      |          |          |          |          |          |      |          |          |          |          |          |     |          |          |          |          |          |       |          |          |          |          |          |      |          |          |          |          |          |  |   |   |   |   |    |     |          |  |  |  |  |      |          |          |  |  |  |      |          |          |          |  |  |     |          |          |          |          |  |       |          |          |          |          |          |      |          |          |          |          |          |
| 10 Re                                                                                                                | 2.245429                                                                                                                                                                                                                                                                                                                                                                                                                                                                                                                                                                                                                                                                                                                                                                                                                                                                                                                                                                                                                                                                                                                                                                                                                                                                                                                                                                                                                                                                                                                                                                                                                                                                                                                                                                                                                                                                                                                                                   | 2.255283 | 2.973524 | 2.224461 | 2.903772 |   |   |     |          |  |  |  |  |      |          |          |  |  |  |      |          |          |          |  |  |     |          |          |          |          |  |      |          |          |          |          |          |     |          |          |          |          |          |      |          |          |          |          |          |      |          |          |          |          |          |     |          |          |          |          |          |       |          |          |          |          |          |      |          |          |          |          |          |  |   |   |   |   |    |     |          |  |  |  |  |      |          |          |  |  |  |      |          |          |          |  |  |     |          |          |          |          |  |       |          |          |          |          |          |      |          |          |          |          |          |
| 11 B                                                                                                                 | 3.817648                                                                                                                                                                                                                                                                                                                                                                                                                                                                                                                                                                                                                                                                                                                                                                                                                                                                                                                                                                                                                                                                                                                                                                                                                                                                                                                                                                                                                                                                                                                                                                                                                                                                                                                                                                                                                                                                                                                                                   | 1.716184 | 2.200495 | 1.696105 | 2.257094 |   |   |     |          |  |  |  |  |      |          |          |  |  |  |      |          |          |          |  |  |     |          |          |          |          |  |      |          |          |          |          |          |     |          |          |          |          |          |      |          |          |          |          |          |      |          |          |          |          |          |     |          |          |          |          |          |       |          |          |          |          |          |      |          |          |          |          |          |  |   |   |   |   |    |     |          |  |  |  |  |      |          |          |  |  |  |      |          |          |          |  |  |     |          |          |          |          |  |       |          |          |          |          |          |      |          |          |          |          |          |
|                                                                                                                      | 6                                                                                                                                                                                                                                                                                                                                                                                                                                                                                                                                                                                                                                                                                                                                                                                                                                                                                                                                                                                                                                                                                                                                                                                                                                                                                                                                                                                                                                                                                                                                                                                                                                                                                                                                                                                                                                                                                                                                                          | 7        | 8        | 9        | 10       |   |   |     |          |  |  |  |  |      |          |          |  |  |  |      |          |          |          |  |  |     |          |          |          |          |  |      |          |          |          |          |          |     |          |          |          |          |          |      |          |          |          |          |          |      |          |          |          |          |          |     |          |          |          |          |          |       |          |          |          |          |          |      |          |          |          |          |          |  |   |   |   |   |    |     |          |  |  |  |  |      |          |          |  |  |  |      |          |          |          |  |  |     |          |          |          |          |  |       |          |          |          |          |          |      |          |          |          |          |          |
| 6 B                                                                                                                  | 0.000000                                                                                                                                                                                                                                                                                                                                                                                                                                                                                                                                                                                                                                                                                                                                                                                                                                                                                                                                                                                                                                                                                                                                                                                                                                                                                                                                                                                                                                                                                                                                                                                                                                                                                                                                                                                                                                                                                                                                                   |          |          |          |          |   |   |     |          |  |  |  |  |      |          |          |  |  |  |      |          |          |          |  |  |     |          |          |          |          |  |      |          |          |          |          |          |     |          |          |          |          |          |      |          |          |          |          |          |      |          |          |          |          |          |     |          |          |          |          |          |       |          |          |          |          |          |      |          |          |          |          |          |  |   |   |   |   |    |     |          |  |  |  |  |      |          |          |  |  |  |      |          |          |          |  |  |     |          |          |          |          |  |       |          |          |          |          |          |      |          |          |          |          |          |
| 7 B                                                                                                                  | 3.317290                                                                                                                                                                                                                                                                                                                                                                                                                                                                                                                                                                                                                                                                                                                                                                                                                                                                                                                                                                                                                                                                                                                                                                                                                                                                                                                                                                                                                                                                                                                                                                                                                                                                                                                                                                                                                                                                                                                                                   | 0.000000 |          |          |          |   |   |     |          |  |  |  |  |      |          |          |  |  |  |      |          |          |          |  |  |     |          |          |          |          |  |      |          |          |          |          |          |     |          |          |          |          |          |      |          |          |          |          |          |      |          |          |          |          |          |     |          |          |          |          |          |       |          |          |          |          |          |      |          |          |          |          |          |  |   |   |   |   |    |     |          |  |  |  |  |      |          |          |  |  |  |      |          |          |          |  |  |     |          |          |          |          |  |       |          |          |          |          |          |      |          |          |          |          |          |
| 8 B                                                                                                                  | 1.840261                                                                                                                                                                                                                                                                                                                                                                                                                                                                                                                                                                                                                                                                                                                                                                                                                                                                                                                                                                                                                                                                                                                                                                                                                                                                                                                                                                                                                                                                                                                                                                                                                                                                                                                                                                                                                                                                                                                                                   | 4.073648 | 0.000000 |          |          |   |   |     |          |  |  |  |  |      |          |          |  |  |  |      |          |          |          |  |  |     |          |          |          |          |  |      |          |          |          |          |          |     |          |          |          |          |          |      |          |          |          |          |          |      |          |          |          |          |          |     |          |          |          |          |          |       |          |          |          |          |          |      |          |          |          |          |          |  |   |   |   |   |    |     |          |  |  |  |  |      |          |          |  |  |  |      |          |          |          |  |  |     |          |          |          |          |  |       |          |          |          |          |          |      |          |          |          |          |          |
| 9 B                                                                                                                  | 1.721151                                                                                                                                                                                                                                                                                                                                                                                                                                                                                                                                                                                                                                                                                                                                                                                                                                                                                                                                                                                                                                                                                                                                                                                                                                                                                                                                                                                                                                                                                                                                                                                                                                                                                                                                                                                                                                                                                                                                                   | 3.229441 | 3.113344 | 0.000000 |          |   |   |     |          |  |  |  |  |      |          |          |  |  |  |      |          |          |          |  |  |     |          |          |          |          |  |      |          |          |          |          |          |     |          |          |          |          |          |      |          |          |          |          |          |      |          |          |          |          |          |     |          |          |          |          |          |       |          |          |          |          |          |      |          |          |          |          |          |  |   |   |   |   |    |     |          |  |  |  |  |      |          |          |  |  |  |      |          |          |          |  |  |     |          |          |          |          |  |       |          |          |          |          |          |      |          |          |          |          |          |
| 10 Re                                                                                                                | 2.257571                                                                                                                                                                                                                                                                                                                                                                                                                                                                                                                                                                                                                                                                                                                                                                                                                                                                                                                                                                                                                                                                                                                                                                                                                                                                                                                                                                                                                                                                                                                                                                                                                                                                                                                                                                                                                                                                                                                                                   | 2.162708 | 2.191676 | 3.179743 | 0.000000 |   |   |     |          |  |  |  |  |      |          |          |  |  |  |      |          |          |          |  |  |     |          |          |          |          |  |      |          |          |          |          |          |     |          |          |          |          |          |      |          |          |          |          |          |      |          |          |          |          |          |     |          |          |          |          |          |       |          |          |          |          |          |      |          |          |          |          |          |  |   |   |   |   |    |     |          |  |  |  |  |      |          |          |  |  |  |      |          |          |          |  |  |     |          |          |          |          |  |       |          |          |          |          |          |      |          |          |          |          |          |
| 11 B                                                                                                                 | 3.874002                                                                                                                                                                                                                                                                                                                                                                                                                                                                                                                                                                                                                                                                                                                                                                                                                                                                                                                                                                                                                                                                                                                                                                                                                                                                                                                                                                                                                                                                                                                                                                                                                                                                                                                                                                                                                                                                                                                                                   | 3.303085 | 3.574782 | 3.450022 | 3.151471 |   |   |     |          |  |  |  |  |      |          |          |  |  |  |      |          |          |          |  |  |     |          |          |          |          |  |      |          |          |          |          |          |     |          |          |          |          |          |      |          |          |          |          |          |      |          |          |          |          |          |     |          |          |          |          |          |       |          |          |          |          |          |      |          |          |          |          |          |  |   |   |   |   |    |     |          |  |  |  |  |      |          |          |  |  |  |      |          |          |          |  |  |     |          |          |          |          |  |       |          |          |          |          |          |      |          |          |          |          |          |
|  <p>2. -1019.3836883 +13.9 C1</p> | <table border="1"> <thead> <tr> <th></th> <th>1</th> <th>2</th> <th>3</th> <th>4</th> <th>5</th> </tr> </thead> <tbody> <tr><td>1 B</td><td>0.000000</td><td></td><td></td><td></td><td></td></tr> <tr><td>2 Re</td><td>2.297485</td><td>0.000000</td><td></td><td></td><td></td></tr> <tr><td>3 B</td><td>3.487101</td><td>2.198603</td><td>0.000000</td><td></td><td></td></tr> <tr><td>4 B</td><td>1.758469</td><td>3.635366</td><td>3.880451</td><td>0.000000</td><td></td></tr> <tr><td>5 B</td><td>3.693799</td><td>3.573494</td><td>1.907139</td><td>3.167231</td><td>0.000000</td></tr> <tr><td>6 B</td><td>2.809906</td><td>3.820000</td><td>3.163708</td><td>1.744001</td><td>1.875752</td></tr> <tr><td>7 Re</td><td>3.114879</td><td>2.865968</td><td>2.188665</td><td>3.303651</td><td>2.189239</td></tr> <tr><td>8 Re</td><td>2.324236</td><td>2.634234</td><td>2.252617</td><td>2.126933</td><td>2.047197</td></tr> <tr><td>9 B</td><td>1.729015</td><td>2.227061</td><td>3.380751</td><td>2.909593</td><td>3.855761</td></tr> <tr><td>10 B</td><td>3.137081</td><td>2.017117</td><td>2.911335</td><td>4.325647</td><td>4.031320</td></tr> <tr><td>11 B</td><td>1.912379</td><td>3.409610</td><td>3.756219</td><td>1.728974</td><td>3.289129</td></tr> <tr> <td></td> <td>6</td> <td>7</td> <td>8</td> <td>9</td> <td>10</td> </tr> <tr><td>6 B</td><td>0.000000</td><td></td><td></td><td></td><td></td></tr> <tr><td>7 Re</td><td>2.227601</td><td>0.000000</td><td></td><td></td><td></td></tr> <tr><td>8 Re</td><td>2.237849</td><td>2.989940</td><td>0.000000</td><td></td><td></td></tr> <tr><td>9 B</td><td>3.117308</td><td>2.279892</td><td>3.310340</td><td>0.000000</td><td></td></tr> <tr><td>10 B</td><td>4.045310</td><td>2.229142</td><td>3.946675</td><td>1.746855</td><td>0.000000</td></tr> <tr><td>11 B</td><td>1.801289</td><td>2.294065</td><td>2.991748</td><td>1.776944</td><td>3.229915</td></tr> </tbody> </table> |          | 1        | 2        | 3        | 4 | 5 | 1 B | 0.000000 |  |  |  |  | 2 Re | 2.297485 | 0.000000 |  |  |  | 3 B  | 3.487101 | 2.198603 | 0.000000 |  |  | 4 B | 1.758469 | 3.635366 | 3.880451 | 0.000000 |  | 5 B  | 3.693799 | 3.573494 | 1.907139 | 3.167231 | 0.000000 | 6 B | 2.809906 | 3.820000 | 3.163708 | 1.744001 | 1.875752 | 7 Re | 3.114879 | 2.865968 | 2.188665 | 3.303651 | 2.189239 | 8 Re | 2.324236 | 2.634234 | 2.252617 | 2.126933 | 2.047197 | 9 B | 1.729015 | 2.227061 | 3.380751 | 2.909593 | 3.855761 | 10 B  | 3.137081 | 2.017117 | 2.911335 | 4.325647 | 4.031320 | 11 B | 1.912379 | 3.409610 | 3.756219 | 1.728974 | 3.289129 |  | 6 | 7 | 8 | 9 | 10 | 6 B | 0.000000 |  |  |  |  | 7 Re | 2.227601 | 0.000000 |  |  |  | 8 Re | 2.237849 | 2.989940 | 0.000000 |  |  | 9 B | 3.117308 | 2.279892 | 3.310340 | 0.000000 |  | 10 B  | 4.045310 | 2.229142 | 3.946675 | 1.746855 | 0.000000 | 11 B | 1.801289 | 2.294065 | 2.991748 | 1.776944 | 3.229915 |
|                                                                                                                      | 1                                                                                                                                                                                                                                                                                                                                                                                                                                                                                                                                                                                                                                                                                                                                                                                                                                                                                                                                                                                                                                                                                                                                                                                                                                                                                                                                                                                                                                                                                                                                                                                                                                                                                                                                                                                                                                                                                                                                                          | 2        | 3        | 4        | 5        |   |   |     |          |  |  |  |  |      |          |          |  |  |  |      |          |          |          |  |  |     |          |          |          |          |  |      |          |          |          |          |          |     |          |          |          |          |          |      |          |          |          |          |          |      |          |          |          |          |          |     |          |          |          |          |          |       |          |          |          |          |          |      |          |          |          |          |          |  |   |   |   |   |    |     |          |  |  |  |  |      |          |          |  |  |  |      |          |          |          |  |  |     |          |          |          |          |  |       |          |          |          |          |          |      |          |          |          |          |          |
| 1 B                                                                                                                  | 0.000000                                                                                                                                                                                                                                                                                                                                                                                                                                                                                                                                                                                                                                                                                                                                                                                                                                                                                                                                                                                                                                                                                                                                                                                                                                                                                                                                                                                                                                                                                                                                                                                                                                                                                                                                                                                                                                                                                                                                                   |          |          |          |          |   |   |     |          |  |  |  |  |      |          |          |  |  |  |      |          |          |          |  |  |     |          |          |          |          |  |      |          |          |          |          |          |     |          |          |          |          |          |      |          |          |          |          |          |      |          |          |          |          |          |     |          |          |          |          |          |       |          |          |          |          |          |      |          |          |          |          |          |  |   |   |   |   |    |     |          |  |  |  |  |      |          |          |  |  |  |      |          |          |          |  |  |     |          |          |          |          |  |       |          |          |          |          |          |      |          |          |          |          |          |
| 2 Re                                                                                                                 | 2.297485                                                                                                                                                                                                                                                                                                                                                                                                                                                                                                                                                                                                                                                                                                                                                                                                                                                                                                                                                                                                                                                                                                                                                                                                                                                                                                                                                                                                                                                                                                                                                                                                                                                                                                                                                                                                                                                                                                                                                   | 0.000000 |          |          |          |   |   |     |          |  |  |  |  |      |          |          |  |  |  |      |          |          |          |  |  |     |          |          |          |          |  |      |          |          |          |          |          |     |          |          |          |          |          |      |          |          |          |          |          |      |          |          |          |          |          |     |          |          |          |          |          |       |          |          |          |          |          |      |          |          |          |          |          |  |   |   |   |   |    |     |          |  |  |  |  |      |          |          |  |  |  |      |          |          |          |  |  |     |          |          |          |          |  |       |          |          |          |          |          |      |          |          |          |          |          |
| 3 B                                                                                                                  | 3.487101                                                                                                                                                                                                                                                                                                                                                                                                                                                                                                                                                                                                                                                                                                                                                                                                                                                                                                                                                                                                                                                                                                                                                                                                                                                                                                                                                                                                                                                                                                                                                                                                                                                                                                                                                                                                                                                                                                                                                   | 2.198603 | 0.000000 |          |          |   |   |     |          |  |  |  |  |      |          |          |  |  |  |      |          |          |          |  |  |     |          |          |          |          |  |      |          |          |          |          |          |     |          |          |          |          |          |      |          |          |          |          |          |      |          |          |          |          |          |     |          |          |          |          |          |       |          |          |          |          |          |      |          |          |          |          |          |  |   |   |   |   |    |     |          |  |  |  |  |      |          |          |  |  |  |      |          |          |          |  |  |     |          |          |          |          |  |       |          |          |          |          |          |      |          |          |          |          |          |
| 4 B                                                                                                                  | 1.758469                                                                                                                                                                                                                                                                                                                                                                                                                                                                                                                                                                                                                                                                                                                                                                                                                                                                                                                                                                                                                                                                                                                                                                                                                                                                                                                                                                                                                                                                                                                                                                                                                                                                                                                                                                                                                                                                                                                                                   | 3.635366 | 3.880451 | 0.000000 |          |   |   |     |          |  |  |  |  |      |          |          |  |  |  |      |          |          |          |  |  |     |          |          |          |          |  |      |          |          |          |          |          |     |          |          |          |          |          |      |          |          |          |          |          |      |          |          |          |          |          |     |          |          |          |          |          |       |          |          |          |          |          |      |          |          |          |          |          |  |   |   |   |   |    |     |          |  |  |  |  |      |          |          |  |  |  |      |          |          |          |  |  |     |          |          |          |          |  |       |          |          |          |          |          |      |          |          |          |          |          |
| 5 B                                                                                                                  | 3.693799                                                                                                                                                                                                                                                                                                                                                                                                                                                                                                                                                                                                                                                                                                                                                                                                                                                                                                                                                                                                                                                                                                                                                                                                                                                                                                                                                                                                                                                                                                                                                                                                                                                                                                                                                                                                                                                                                                                                                   | 3.573494 | 1.907139 | 3.167231 | 0.000000 |   |   |     |          |  |  |  |  |      |          |          |  |  |  |      |          |          |          |  |  |     |          |          |          |          |  |      |          |          |          |          |          |     |          |          |          |          |          |      |          |          |          |          |          |      |          |          |          |          |          |     |          |          |          |          |          |       |          |          |          |          |          |      |          |          |          |          |          |  |   |   |   |   |    |     |          |  |  |  |  |      |          |          |  |  |  |      |          |          |          |  |  |     |          |          |          |          |  |       |          |          |          |          |          |      |          |          |          |          |          |
| 6 B                                                                                                                  | 2.809906                                                                                                                                                                                                                                                                                                                                                                                                                                                                                                                                                                                                                                                                                                                                                                                                                                                                                                                                                                                                                                                                                                                                                                                                                                                                                                                                                                                                                                                                                                                                                                                                                                                                                                                                                                                                                                                                                                                                                   | 3.820000 | 3.163708 | 1.744001 | 1.875752 |   |   |     |          |  |  |  |  |      |          |          |  |  |  |      |          |          |          |  |  |     |          |          |          |          |  |      |          |          |          |          |          |     |          |          |          |          |          |      |          |          |          |          |          |      |          |          |          |          |          |     |          |          |          |          |          |       |          |          |          |          |          |      |          |          |          |          |          |  |   |   |   |   |    |     |          |  |  |  |  |      |          |          |  |  |  |      |          |          |          |  |  |     |          |          |          |          |  |       |          |          |          |          |          |      |          |          |          |          |          |
| 7 Re                                                                                                                 | 3.114879                                                                                                                                                                                                                                                                                                                                                                                                                                                                                                                                                                                                                                                                                                                                                                                                                                                                                                                                                                                                                                                                                                                                                                                                                                                                                                                                                                                                                                                                                                                                                                                                                                                                                                                                                                                                                                                                                                                                                   | 2.865968 | 2.188665 | 3.303651 | 2.189239 |   |   |     |          |  |  |  |  |      |          |          |  |  |  |      |          |          |          |  |  |     |          |          |          |          |  |      |          |          |          |          |          |     |          |          |          |          |          |      |          |          |          |          |          |      |          |          |          |          |          |     |          |          |          |          |          |       |          |          |          |          |          |      |          |          |          |          |          |  |   |   |   |   |    |     |          |  |  |  |  |      |          |          |  |  |  |      |          |          |          |  |  |     |          |          |          |          |  |       |          |          |          |          |          |      |          |          |          |          |          |
| 8 Re                                                                                                                 | 2.324236                                                                                                                                                                                                                                                                                                                                                                                                                                                                                                                                                                                                                                                                                                                                                                                                                                                                                                                                                                                                                                                                                                                                                                                                                                                                                                                                                                                                                                                                                                                                                                                                                                                                                                                                                                                                                                                                                                                                                   | 2.634234 | 2.252617 | 2.126933 | 2.047197 |   |   |     |          |  |  |  |  |      |          |          |  |  |  |      |          |          |          |  |  |     |          |          |          |          |  |      |          |          |          |          |          |     |          |          |          |          |          |      |          |          |          |          |          |      |          |          |          |          |          |     |          |          |          |          |          |       |          |          |          |          |          |      |          |          |          |          |          |  |   |   |   |   |    |     |          |  |  |  |  |      |          |          |  |  |  |      |          |          |          |  |  |     |          |          |          |          |  |       |          |          |          |          |          |      |          |          |          |          |          |
| 9 B                                                                                                                  | 1.729015                                                                                                                                                                                                                                                                                                                                                                                                                                                                                                                                                                                                                                                                                                                                                                                                                                                                                                                                                                                                                                                                                                                                                                                                                                                                                                                                                                                                                                                                                                                                                                                                                                                                                                                                                                                                                                                                                                                                                   | 2.227061 | 3.380751 | 2.909593 | 3.855761 |   |   |     |          |  |  |  |  |      |          |          |  |  |  |      |          |          |          |  |  |     |          |          |          |          |  |      |          |          |          |          |          |     |          |          |          |          |          |      |          |          |          |          |          |      |          |          |          |          |          |     |          |          |          |          |          |       |          |          |          |          |          |      |          |          |          |          |          |  |   |   |   |   |    |     |          |  |  |  |  |      |          |          |  |  |  |      |          |          |          |  |  |     |          |          |          |          |  |       |          |          |          |          |          |      |          |          |          |          |          |
| 10 B                                                                                                                 | 3.137081                                                                                                                                                                                                                                                                                                                                                                                                                                                                                                                                                                                                                                                                                                                                                                                                                                                                                                                                                                                                                                                                                                                                                                                                                                                                                                                                                                                                                                                                                                                                                                                                                                                                                                                                                                                                                                                                                                                                                   | 2.017117 | 2.911335 | 4.325647 | 4.031320 |   |   |     |          |  |  |  |  |      |          |          |  |  |  |      |          |          |          |  |  |     |          |          |          |          |  |      |          |          |          |          |          |     |          |          |          |          |          |      |          |          |          |          |          |      |          |          |          |          |          |     |          |          |          |          |          |       |          |          |          |          |          |      |          |          |          |          |          |  |   |   |   |   |    |     |          |  |  |  |  |      |          |          |  |  |  |      |          |          |          |  |  |     |          |          |          |          |  |       |          |          |          |          |          |      |          |          |          |          |          |
| 11 B                                                                                                                 | 1.912379                                                                                                                                                                                                                                                                                                                                                                                                                                                                                                                                                                                                                                                                                                                                                                                                                                                                                                                                                                                                                                                                                                                                                                                                                                                                                                                                                                                                                                                                                                                                                                                                                                                                                                                                                                                                                                                                                                                                                   | 3.409610 | 3.756219 | 1.728974 | 3.289129 |   |   |     |          |  |  |  |  |      |          |          |  |  |  |      |          |          |          |  |  |     |          |          |          |          |  |      |          |          |          |          |          |     |          |          |          |          |          |      |          |          |          |          |          |      |          |          |          |          |          |     |          |          |          |          |          |       |          |          |          |          |          |      |          |          |          |          |          |  |   |   |   |   |    |     |          |  |  |  |  |      |          |          |  |  |  |      |          |          |          |  |  |     |          |          |          |          |  |       |          |          |          |          |          |      |          |          |          |          |          |
|                                                                                                                      | 6                                                                                                                                                                                                                                                                                                                                                                                                                                                                                                                                                                                                                                                                                                                                                                                                                                                                                                                                                                                                                                                                                                                                                                                                                                                                                                                                                                                                                                                                                                                                                                                                                                                                                                                                                                                                                                                                                                                                                          | 7        | 8        | 9        | 10       |   |   |     |          |  |  |  |  |      |          |          |  |  |  |      |          |          |          |  |  |     |          |          |          |          |  |      |          |          |          |          |          |     |          |          |          |          |          |      |          |          |          |          |          |      |          |          |          |          |          |     |          |          |          |          |          |       |          |          |          |          |          |      |          |          |          |          |          |  |   |   |   |   |    |     |          |  |  |  |  |      |          |          |  |  |  |      |          |          |          |  |  |     |          |          |          |          |  |       |          |          |          |          |          |      |          |          |          |          |          |
| 6 B                                                                                                                  | 0.000000                                                                                                                                                                                                                                                                                                                                                                                                                                                                                                                                                                                                                                                                                                                                                                                                                                                                                                                                                                                                                                                                                                                                                                                                                                                                                                                                                                                                                                                                                                                                                                                                                                                                                                                                                                                                                                                                                                                                                   |          |          |          |          |   |   |     |          |  |  |  |  |      |          |          |  |  |  |      |          |          |          |  |  |     |          |          |          |          |  |      |          |          |          |          |          |     |          |          |          |          |          |      |          |          |          |          |          |      |          |          |          |          |          |     |          |          |          |          |          |       |          |          |          |          |          |      |          |          |          |          |          |  |   |   |   |   |    |     |          |  |  |  |  |      |          |          |  |  |  |      |          |          |          |  |  |     |          |          |          |          |  |       |          |          |          |          |          |      |          |          |          |          |          |
| 7 Re                                                                                                                 | 2.227601                                                                                                                                                                                                                                                                                                                                                                                                                                                                                                                                                                                                                                                                                                                                                                                                                                                                                                                                                                                                                                                                                                                                                                                                                                                                                                                                                                                                                                                                                                                                                                                                                                                                                                                                                                                                                                                                                                                                                   | 0.000000 |          |          |          |   |   |     |          |  |  |  |  |      |          |          |  |  |  |      |          |          |          |  |  |     |          |          |          |          |  |      |          |          |          |          |          |     |          |          |          |          |          |      |          |          |          |          |          |      |          |          |          |          |          |     |          |          |          |          |          |       |          |          |          |          |          |      |          |          |          |          |          |  |   |   |   |   |    |     |          |  |  |  |  |      |          |          |  |  |  |      |          |          |          |  |  |     |          |          |          |          |  |       |          |          |          |          |          |      |          |          |          |          |          |
| 8 Re                                                                                                                 | 2.237849                                                                                                                                                                                                                                                                                                                                                                                                                                                                                                                                                                                                                                                                                                                                                                                                                                                                                                                                                                                                                                                                                                                                                                                                                                                                                                                                                                                                                                                                                                                                                                                                                                                                                                                                                                                                                                                                                                                                                   | 2.989940 | 0.000000 |          |          |   |   |     |          |  |  |  |  |      |          |          |  |  |  |      |          |          |          |  |  |     |          |          |          |          |  |      |          |          |          |          |          |     |          |          |          |          |          |      |          |          |          |          |          |      |          |          |          |          |          |     |          |          |          |          |          |       |          |          |          |          |          |      |          |          |          |          |          |  |   |   |   |   |    |     |          |  |  |  |  |      |          |          |  |  |  |      |          |          |          |  |  |     |          |          |          |          |  |       |          |          |          |          |          |      |          |          |          |          |          |
| 9 B                                                                                                                  | 3.117308                                                                                                                                                                                                                                                                                                                                                                                                                                                                                                                                                                                                                                                                                                                                                                                                                                                                                                                                                                                                                                                                                                                                                                                                                                                                                                                                                                                                                                                                                                                                                                                                                                                                                                                                                                                                                                                                                                                                                   | 2.279892 | 3.310340 | 0.000000 |          |   |   |     |          |  |  |  |  |      |          |          |  |  |  |      |          |          |          |  |  |     |          |          |          |          |  |      |          |          |          |          |          |     |          |          |          |          |          |      |          |          |          |          |          |      |          |          |          |          |          |     |          |          |          |          |          |       |          |          |          |          |          |      |          |          |          |          |          |  |   |   |   |   |    |     |          |  |  |  |  |      |          |          |  |  |  |      |          |          |          |  |  |     |          |          |          |          |  |       |          |          |          |          |          |      |          |          |          |          |          |
| 10 B                                                                                                                 | 4.045310                                                                                                                                                                                                                                                                                                                                                                                                                                                                                                                                                                                                                                                                                                                                                                                                                                                                                                                                                                                                                                                                                                                                                                                                                                                                                                                                                                                                                                                                                                                                                                                                                                                                                                                                                                                                                                                                                                                                                   | 2.229142 | 3.946675 | 1.746855 | 0.000000 |   |   |     |          |  |  |  |  |      |          |          |  |  |  |      |          |          |          |  |  |     |          |          |          |          |  |      |          |          |          |          |          |     |          |          |          |          |          |      |          |          |          |          |          |      |          |          |          |          |          |     |          |          |          |          |          |       |          |          |          |          |          |      |          |          |          |          |          |  |   |   |   |   |    |     |          |  |  |  |  |      |          |          |  |  |  |      |          |          |          |  |  |     |          |          |          |          |  |       |          |          |          |          |          |      |          |          |          |          |          |
| 11 B                                                                                                                 | 1.801289                                                                                                                                                                                                                                                                                                                                                                                                                                                                                                                                                                                                                                                                                                                                                                                                                                                                                                                                                                                                                                                                                                                                                                                                                                                                                                                                                                                                                                                                                                                                                                                                                                                                                                                                                                                                                                                                                                                                                   | 2.294065 | 2.991748 | 1.776944 | 3.229915 |   |   |     |          |  |  |  |  |      |          |          |  |  |  |      |          |          |          |  |  |     |          |          |          |          |  |      |          |          |          |          |          |     |          |          |          |          |          |      |          |          |          |          |          |      |          |          |          |          |          |     |          |          |          |          |          |       |          |          |          |          |          |      |          |          |          |          |          |  |   |   |   |   |    |     |          |  |  |  |  |      |          |          |  |  |  |      |          |          |          |  |  |     |          |          |          |          |  |       |          |          |          |          |          |      |          |          |          |          |          |

| 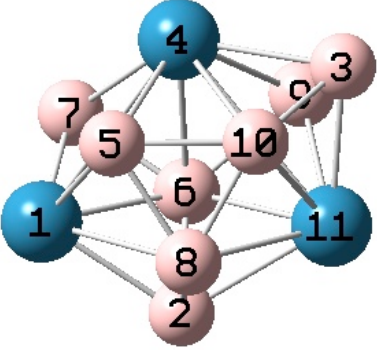 <p>3. -1019.3768242 +18.2 C1</p>  | <table border="1"> <thead> <tr> <th></th> <th>1</th> <th>2</th> <th>3</th> <th>4</th> <th>5</th> </tr> </thead> <tbody> <tr><td>1 Re</td><td>0.000000</td><td></td><td></td><td></td><td></td></tr> <tr><td>2 B</td><td>2.104331</td><td>0.000000</td><td></td><td></td><td></td></tr> <tr><td>3 B</td><td>4.273330</td><td>3.777802</td><td>0.000000</td><td></td><td></td></tr> <tr><td>4 Re</td><td>2.848465</td><td>3.428645</td><td>2.139606</td><td>0.000000</td><td></td></tr> <tr><td>5 B</td><td>2.126639</td><td>3.007887</td><td>3.225053</td><td>2.220972</td><td>0.000000</td></tr> <tr><td>6 B</td><td>2.261841</td><td>1.822293</td><td>3.128322</td><td>2.340015</td><td>3.168324</td></tr> <tr><td>7 B</td><td>2.044137</td><td>3.091161</td><td>4.019619</td><td>2.251968</td><td>3.218339</td></tr> <tr><td>8 B</td><td>2.339049</td><td>1.770882</td><td>3.202525</td><td>3.060685</td><td>1.783142</td></tr> <tr><td>9 B</td><td>3.838589</td><td>3.268803</td><td>1.969074</td><td>2.156825</td><td>3.834196</td></tr> <tr><td>10 B</td><td>3.329600</td><td>3.067369</td><td>1.821050</td><td>2.286832</td><td>1.796000</td></tr> <tr><td>11 Re</td><td>3.621332</td><td>2.181369</td><td>2.083361</td><td>3.006480</td><td>3.381026</td></tr> <tr> <th></th> <th>6</th> <th>7</th> <th>8</th> <th>9</th> <th>10</th> </tr> <tr><td>6 B</td><td>0.000000</td><td></td><td></td><td></td><td></td></tr> <tr><td>7 B</td><td>1.755844</td><td>0.000000</td><td></td><td></td><td></td></tr> <tr><td>8 B</td><td>2.801834</td><td>3.701240</td><td>0.000000</td><td></td><td></td></tr> <tr><td>9 B</td><td>1.879923</td><td>2.898415</td><td>3.656016</td><td>0.000000</td><td></td></tr> <tr><td>10 B</td><td>3.189358</td><td>3.956291</td><td>1.753695</td><td>3.101754</td><td>0.000000</td></tr> <tr><td>11 Re</td><td>2.251926</td><td>3.832900</td><td>2.306490</td><td>2.100081</td><td>2.235355</td></tr> </tbody> </table>   |          | 1        | 2        | 3        | 4 | 5 | 1 Re | 0.000000 |  |  |  |  | 2 B | 2.104331 | 0.000000 |  |  |  | 3 B | 4.273330 | 3.777802 | 0.000000 |  |  | 4 Re | 2.848465 | 3.428645 | 2.139606 | 0.000000 |  | 5 B | 2.126639 | 3.007887 | 3.225053 | 2.220972 | 0.000000 | 6 B | 2.261841 | 1.822293 | 3.128322 | 2.340015 | 3.168324 | 7 B  | 2.044137 | 3.091161 | 4.019619 | 2.251968 | 3.218339 | 8 B | 2.339049 | 1.770882 | 3.202525 | 3.060685 | 1.783142 | 9 B  | 3.838589 | 3.268803 | 1.969074 | 2.156825 | 3.834196 | 10 B | 3.329600 | 3.067369 | 1.821050 | 2.286832 | 1.796000 | 11 Re | 3.621332 | 2.181369 | 2.083361 | 3.006480 | 3.381026 |  | 6 | 7 | 8 | 9 | 10 | 6 B | 0.000000 |  |  |  |  | 7 B  | 1.755844 | 0.000000 |  |  |  | 8 B | 2.801834 | 3.701240 | 0.000000 |  |  | 9 B  | 1.879923 | 2.898415 | 3.656016 | 0.000000 |  | 10 B | 3.189358 | 3.956291 | 1.753695 | 3.101754 | 0.000000 | 11 Re | 2.251926 | 3.832900 | 2.306490 | 2.100081 | 2.235355 |
|---------------------------------------------------------------------------------------------------------------------|-------------------------------------------------------------------------------------------------------------------------------------------------------------------------------------------------------------------------------------------------------------------------------------------------------------------------------------------------------------------------------------------------------------------------------------------------------------------------------------------------------------------------------------------------------------------------------------------------------------------------------------------------------------------------------------------------------------------------------------------------------------------------------------------------------------------------------------------------------------------------------------------------------------------------------------------------------------------------------------------------------------------------------------------------------------------------------------------------------------------------------------------------------------------------------------------------------------------------------------------------------------------------------------------------------------------------------------------------------------------------------------------------------------------------------------------------------------------------------------------------------------------------------------------------------------------------------------------------------------------------------------------------------------------------------------------------------------------------------------------------------------------------------------------------------------------------------------------------------------------------------------------------------------------------------------------------------------|----------|----------|----------|----------|---|---|------|----------|--|--|--|--|-----|----------|----------|--|--|--|-----|----------|----------|----------|--|--|------|----------|----------|----------|----------|--|-----|----------|----------|----------|----------|----------|-----|----------|----------|----------|----------|----------|------|----------|----------|----------|----------|----------|-----|----------|----------|----------|----------|----------|------|----------|----------|----------|----------|----------|------|----------|----------|----------|----------|----------|-------|----------|----------|----------|----------|----------|--|---|---|---|---|----|-----|----------|--|--|--|--|------|----------|----------|--|--|--|-----|----------|----------|----------|--|--|------|----------|----------|----------|----------|--|------|----------|----------|----------|----------|----------|-------|----------|----------|----------|----------|----------|
|                                                                                                                     | 1                                                                                                                                                                                                                                                                                                                                                                                                                                                                                                                                                                                                                                                                                                                                                                                                                                                                                                                                                                                                                                                                                                                                                                                                                                                                                                                                                                                                                                                                                                                                                                                                                                                                                                                                                                                                                                                                                                                                                           | 2        | 3        | 4        | 5        |   |   |      |          |  |  |  |  |     |          |          |  |  |  |     |          |          |          |  |  |      |          |          |          |          |  |     |          |          |          |          |          |     |          |          |          |          |          |      |          |          |          |          |          |     |          |          |          |          |          |      |          |          |          |          |          |      |          |          |          |          |          |       |          |          |          |          |          |  |   |   |   |   |    |     |          |  |  |  |  |      |          |          |  |  |  |     |          |          |          |  |  |      |          |          |          |          |  |      |          |          |          |          |          |       |          |          |          |          |          |
| 1 Re                                                                                                                | 0.000000                                                                                                                                                                                                                                                                                                                                                                                                                                                                                                                                                                                                                                                                                                                                                                                                                                                                                                                                                                                                                                                                                                                                                                                                                                                                                                                                                                                                                                                                                                                                                                                                                                                                                                                                                                                                                                                                                                                                                    |          |          |          |          |   |   |      |          |  |  |  |  |     |          |          |  |  |  |     |          |          |          |  |  |      |          |          |          |          |  |     |          |          |          |          |          |     |          |          |          |          |          |      |          |          |          |          |          |     |          |          |          |          |          |      |          |          |          |          |          |      |          |          |          |          |          |       |          |          |          |          |          |  |   |   |   |   |    |     |          |  |  |  |  |      |          |          |  |  |  |     |          |          |          |  |  |      |          |          |          |          |  |      |          |          |          |          |          |       |          |          |          |          |          |
| 2 B                                                                                                                 | 2.104331                                                                                                                                                                                                                                                                                                                                                                                                                                                                                                                                                                                                                                                                                                                                                                                                                                                                                                                                                                                                                                                                                                                                                                                                                                                                                                                                                                                                                                                                                                                                                                                                                                                                                                                                                                                                                                                                                                                                                    | 0.000000 |          |          |          |   |   |      |          |  |  |  |  |     |          |          |  |  |  |     |          |          |          |  |  |      |          |          |          |          |  |     |          |          |          |          |          |     |          |          |          |          |          |      |          |          |          |          |          |     |          |          |          |          |          |      |          |          |          |          |          |      |          |          |          |          |          |       |          |          |          |          |          |  |   |   |   |   |    |     |          |  |  |  |  |      |          |          |  |  |  |     |          |          |          |  |  |      |          |          |          |          |  |      |          |          |          |          |          |       |          |          |          |          |          |
| 3 B                                                                                                                 | 4.273330                                                                                                                                                                                                                                                                                                                                                                                                                                                                                                                                                                                                                                                                                                                                                                                                                                                                                                                                                                                                                                                                                                                                                                                                                                                                                                                                                                                                                                                                                                                                                                                                                                                                                                                                                                                                                                                                                                                                                    | 3.777802 | 0.000000 |          |          |   |   |      |          |  |  |  |  |     |          |          |  |  |  |     |          |          |          |  |  |      |          |          |          |          |  |     |          |          |          |          |          |     |          |          |          |          |          |      |          |          |          |          |          |     |          |          |          |          |          |      |          |          |          |          |          |      |          |          |          |          |          |       |          |          |          |          |          |  |   |   |   |   |    |     |          |  |  |  |  |      |          |          |  |  |  |     |          |          |          |  |  |      |          |          |          |          |  |      |          |          |          |          |          |       |          |          |          |          |          |
| 4 Re                                                                                                                | 2.848465                                                                                                                                                                                                                                                                                                                                                                                                                                                                                                                                                                                                                                                                                                                                                                                                                                                                                                                                                                                                                                                                                                                                                                                                                                                                                                                                                                                                                                                                                                                                                                                                                                                                                                                                                                                                                                                                                                                                                    | 3.428645 | 2.139606 | 0.000000 |          |   |   |      |          |  |  |  |  |     |          |          |  |  |  |     |          |          |          |  |  |      |          |          |          |          |  |     |          |          |          |          |          |     |          |          |          |          |          |      |          |          |          |          |          |     |          |          |          |          |          |      |          |          |          |          |          |      |          |          |          |          |          |       |          |          |          |          |          |  |   |   |   |   |    |     |          |  |  |  |  |      |          |          |  |  |  |     |          |          |          |  |  |      |          |          |          |          |  |      |          |          |          |          |          |       |          |          |          |          |          |
| 5 B                                                                                                                 | 2.126639                                                                                                                                                                                                                                                                                                                                                                                                                                                                                                                                                                                                                                                                                                                                                                                                                                                                                                                                                                                                                                                                                                                                                                                                                                                                                                                                                                                                                                                                                                                                                                                                                                                                                                                                                                                                                                                                                                                                                    | 3.007887 | 3.225053 | 2.220972 | 0.000000 |   |   |      |          |  |  |  |  |     |          |          |  |  |  |     |          |          |          |  |  |      |          |          |          |          |  |     |          |          |          |          |          |     |          |          |          |          |          |      |          |          |          |          |          |     |          |          |          |          |          |      |          |          |          |          |          |      |          |          |          |          |          |       |          |          |          |          |          |  |   |   |   |   |    |     |          |  |  |  |  |      |          |          |  |  |  |     |          |          |          |  |  |      |          |          |          |          |  |      |          |          |          |          |          |       |          |          |          |          |          |
| 6 B                                                                                                                 | 2.261841                                                                                                                                                                                                                                                                                                                                                                                                                                                                                                                                                                                                                                                                                                                                                                                                                                                                                                                                                                                                                                                                                                                                                                                                                                                                                                                                                                                                                                                                                                                                                                                                                                                                                                                                                                                                                                                                                                                                                    | 1.822293 | 3.128322 | 2.340015 | 3.168324 |   |   |      |          |  |  |  |  |     |          |          |  |  |  |     |          |          |          |  |  |      |          |          |          |          |  |     |          |          |          |          |          |     |          |          |          |          |          |      |          |          |          |          |          |     |          |          |          |          |          |      |          |          |          |          |          |      |          |          |          |          |          |       |          |          |          |          |          |  |   |   |   |   |    |     |          |  |  |  |  |      |          |          |  |  |  |     |          |          |          |  |  |      |          |          |          |          |  |      |          |          |          |          |          |       |          |          |          |          |          |
| 7 B                                                                                                                 | 2.044137                                                                                                                                                                                                                                                                                                                                                                                                                                                                                                                                                                                                                                                                                                                                                                                                                                                                                                                                                                                                                                                                                                                                                                                                                                                                                                                                                                                                                                                                                                                                                                                                                                                                                                                                                                                                                                                                                                                                                    | 3.091161 | 4.019619 | 2.251968 | 3.218339 |   |   |      |          |  |  |  |  |     |          |          |  |  |  |     |          |          |          |  |  |      |          |          |          |          |  |     |          |          |          |          |          |     |          |          |          |          |          |      |          |          |          |          |          |     |          |          |          |          |          |      |          |          |          |          |          |      |          |          |          |          |          |       |          |          |          |          |          |  |   |   |   |   |    |     |          |  |  |  |  |      |          |          |  |  |  |     |          |          |          |  |  |      |          |          |          |          |  |      |          |          |          |          |          |       |          |          |          |          |          |
| 8 B                                                                                                                 | 2.339049                                                                                                                                                                                                                                                                                                                                                                                                                                                                                                                                                                                                                                                                                                                                                                                                                                                                                                                                                                                                                                                                                                                                                                                                                                                                                                                                                                                                                                                                                                                                                                                                                                                                                                                                                                                                                                                                                                                                                    | 1.770882 | 3.202525 | 3.060685 | 1.783142 |   |   |      |          |  |  |  |  |     |          |          |  |  |  |     |          |          |          |  |  |      |          |          |          |          |  |     |          |          |          |          |          |     |          |          |          |          |          |      |          |          |          |          |          |     |          |          |          |          |          |      |          |          |          |          |          |      |          |          |          |          |          |       |          |          |          |          |          |  |   |   |   |   |    |     |          |  |  |  |  |      |          |          |  |  |  |     |          |          |          |  |  |      |          |          |          |          |  |      |          |          |          |          |          |       |          |          |          |          |          |
| 9 B                                                                                                                 | 3.838589                                                                                                                                                                                                                                                                                                                                                                                                                                                                                                                                                                                                                                                                                                                                                                                                                                                                                                                                                                                                                                                                                                                                                                                                                                                                                                                                                                                                                                                                                                                                                                                                                                                                                                                                                                                                                                                                                                                                                    | 3.268803 | 1.969074 | 2.156825 | 3.834196 |   |   |      |          |  |  |  |  |     |          |          |  |  |  |     |          |          |          |  |  |      |          |          |          |          |  |     |          |          |          |          |          |     |          |          |          |          |          |      |          |          |          |          |          |     |          |          |          |          |          |      |          |          |          |          |          |      |          |          |          |          |          |       |          |          |          |          |          |  |   |   |   |   |    |     |          |  |  |  |  |      |          |          |  |  |  |     |          |          |          |  |  |      |          |          |          |          |  |      |          |          |          |          |          |       |          |          |          |          |          |
| 10 B                                                                                                                | 3.329600                                                                                                                                                                                                                                                                                                                                                                                                                                                                                                                                                                                                                                                                                                                                                                                                                                                                                                                                                                                                                                                                                                                                                                                                                                                                                                                                                                                                                                                                                                                                                                                                                                                                                                                                                                                                                                                                                                                                                    | 3.067369 | 1.821050 | 2.286832 | 1.796000 |   |   |      |          |  |  |  |  |     |          |          |  |  |  |     |          |          |          |  |  |      |          |          |          |          |  |     |          |          |          |          |          |     |          |          |          |          |          |      |          |          |          |          |          |     |          |          |          |          |          |      |          |          |          |          |          |      |          |          |          |          |          |       |          |          |          |          |          |  |   |   |   |   |    |     |          |  |  |  |  |      |          |          |  |  |  |     |          |          |          |  |  |      |          |          |          |          |  |      |          |          |          |          |          |       |          |          |          |          |          |
| 11 Re                                                                                                               | 3.621332                                                                                                                                                                                                                                                                                                                                                                                                                                                                                                                                                                                                                                                                                                                                                                                                                                                                                                                                                                                                                                                                                                                                                                                                                                                                                                                                                                                                                                                                                                                                                                                                                                                                                                                                                                                                                                                                                                                                                    | 2.181369 | 2.083361 | 3.006480 | 3.381026 |   |   |      |          |  |  |  |  |     |          |          |  |  |  |     |          |          |          |  |  |      |          |          |          |          |  |     |          |          |          |          |          |     |          |          |          |          |          |      |          |          |          |          |          |     |          |          |          |          |          |      |          |          |          |          |          |      |          |          |          |          |          |       |          |          |          |          |          |  |   |   |   |   |    |     |          |  |  |  |  |      |          |          |  |  |  |     |          |          |          |  |  |      |          |          |          |          |  |      |          |          |          |          |          |       |          |          |          |          |          |
|                                                                                                                     | 6                                                                                                                                                                                                                                                                                                                                                                                                                                                                                                                                                                                                                                                                                                                                                                                                                                                                                                                                                                                                                                                                                                                                                                                                                                                                                                                                                                                                                                                                                                                                                                                                                                                                                                                                                                                                                                                                                                                                                           | 7        | 8        | 9        | 10       |   |   |      |          |  |  |  |  |     |          |          |  |  |  |     |          |          |          |  |  |      |          |          |          |          |  |     |          |          |          |          |          |     |          |          |          |          |          |      |          |          |          |          |          |     |          |          |          |          |          |      |          |          |          |          |          |      |          |          |          |          |          |       |          |          |          |          |          |  |   |   |   |   |    |     |          |  |  |  |  |      |          |          |  |  |  |     |          |          |          |  |  |      |          |          |          |          |  |      |          |          |          |          |          |       |          |          |          |          |          |
| 6 B                                                                                                                 | 0.000000                                                                                                                                                                                                                                                                                                                                                                                                                                                                                                                                                                                                                                                                                                                                                                                                                                                                                                                                                                                                                                                                                                                                                                                                                                                                                                                                                                                                                                                                                                                                                                                                                                                                                                                                                                                                                                                                                                                                                    |          |          |          |          |   |   |      |          |  |  |  |  |     |          |          |  |  |  |     |          |          |          |  |  |      |          |          |          |          |  |     |          |          |          |          |          |     |          |          |          |          |          |      |          |          |          |          |          |     |          |          |          |          |          |      |          |          |          |          |          |      |          |          |          |          |          |       |          |          |          |          |          |  |   |   |   |   |    |     |          |  |  |  |  |      |          |          |  |  |  |     |          |          |          |  |  |      |          |          |          |          |  |      |          |          |          |          |          |       |          |          |          |          |          |
| 7 B                                                                                                                 | 1.755844                                                                                                                                                                                                                                                                                                                                                                                                                                                                                                                                                                                                                                                                                                                                                                                                                                                                                                                                                                                                                                                                                                                                                                                                                                                                                                                                                                                                                                                                                                                                                                                                                                                                                                                                                                                                                                                                                                                                                    | 0.000000 |          |          |          |   |   |      |          |  |  |  |  |     |          |          |  |  |  |     |          |          |          |  |  |      |          |          |          |          |  |     |          |          |          |          |          |     |          |          |          |          |          |      |          |          |          |          |          |     |          |          |          |          |          |      |          |          |          |          |          |      |          |          |          |          |          |       |          |          |          |          |          |  |   |   |   |   |    |     |          |  |  |  |  |      |          |          |  |  |  |     |          |          |          |  |  |      |          |          |          |          |  |      |          |          |          |          |          |       |          |          |          |          |          |
| 8 B                                                                                                                 | 2.801834                                                                                                                                                                                                                                                                                                                                                                                                                                                                                                                                                                                                                                                                                                                                                                                                                                                                                                                                                                                                                                                                                                                                                                                                                                                                                                                                                                                                                                                                                                                                                                                                                                                                                                                                                                                                                                                                                                                                                    | 3.701240 | 0.000000 |          |          |   |   |      |          |  |  |  |  |     |          |          |  |  |  |     |          |          |          |  |  |      |          |          |          |          |  |     |          |          |          |          |          |     |          |          |          |          |          |      |          |          |          |          |          |     |          |          |          |          |          |      |          |          |          |          |          |      |          |          |          |          |          |       |          |          |          |          |          |  |   |   |   |   |    |     |          |  |  |  |  |      |          |          |  |  |  |     |          |          |          |  |  |      |          |          |          |          |  |      |          |          |          |          |          |       |          |          |          |          |          |
| 9 B                                                                                                                 | 1.879923                                                                                                                                                                                                                                                                                                                                                                                                                                                                                                                                                                                                                                                                                                                                                                                                                                                                                                                                                                                                                                                                                                                                                                                                                                                                                                                                                                                                                                                                                                                                                                                                                                                                                                                                                                                                                                                                                                                                                    | 2.898415 | 3.656016 | 0.000000 |          |   |   |      |          |  |  |  |  |     |          |          |  |  |  |     |          |          |          |  |  |      |          |          |          |          |  |     |          |          |          |          |          |     |          |          |          |          |          |      |          |          |          |          |          |     |          |          |          |          |          |      |          |          |          |          |          |      |          |          |          |          |          |       |          |          |          |          |          |  |   |   |   |   |    |     |          |  |  |  |  |      |          |          |  |  |  |     |          |          |          |  |  |      |          |          |          |          |  |      |          |          |          |          |          |       |          |          |          |          |          |
| 10 B                                                                                                                | 3.189358                                                                                                                                                                                                                                                                                                                                                                                                                                                                                                                                                                                                                                                                                                                                                                                                                                                                                                                                                                                                                                                                                                                                                                                                                                                                                                                                                                                                                                                                                                                                                                                                                                                                                                                                                                                                                                                                                                                                                    | 3.956291 | 1.753695 | 3.101754 | 0.000000 |   |   |      |          |  |  |  |  |     |          |          |  |  |  |     |          |          |          |  |  |      |          |          |          |          |  |     |          |          |          |          |          |     |          |          |          |          |          |      |          |          |          |          |          |     |          |          |          |          |          |      |          |          |          |          |          |      |          |          |          |          |          |       |          |          |          |          |          |  |   |   |   |   |    |     |          |  |  |  |  |      |          |          |  |  |  |     |          |          |          |  |  |      |          |          |          |          |  |      |          |          |          |          |          |       |          |          |          |          |          |
| 11 Re                                                                                                               | 2.251926                                                                                                                                                                                                                                                                                                                                                                                                                                                                                                                                                                                                                                                                                                                                                                                                                                                                                                                                                                                                                                                                                                                                                                                                                                                                                                                                                                                                                                                                                                                                                                                                                                                                                                                                                                                                                                                                                                                                                    | 3.832900 | 2.306490 | 2.100081 | 2.235355 |   |   |      |          |  |  |  |  |     |          |          |  |  |  |     |          |          |          |  |  |      |          |          |          |          |  |     |          |          |          |          |          |     |          |          |          |          |          |      |          |          |          |          |          |     |          |          |          |          |          |      |          |          |          |          |          |      |          |          |          |          |          |       |          |          |          |          |          |  |   |   |   |   |    |     |          |  |  |  |  |      |          |          |  |  |  |     |          |          |          |  |  |      |          |          |          |          |  |      |          |          |          |          |          |       |          |          |          |          |          |
|  <p>4. -1019.3766604 +18.3 CS</p> | <table border="1"> <thead> <tr> <th></th> <th>1</th> <th>2</th> <th>3</th> <th>4</th> <th>5</th> </tr> </thead> <tbody> <tr><td>1 B</td><td>0.000000</td><td></td><td></td><td></td><td></td></tr> <tr><td>2 B</td><td>1.755570</td><td>0.000000</td><td></td><td></td><td></td></tr> <tr><td>3 B</td><td>2.900783</td><td>2.972618</td><td>0.000000</td><td></td><td></td></tr> <tr><td>4 B</td><td>3.796645</td><td>3.408982</td><td>3.417578</td><td>0.000000</td><td></td></tr> <tr><td>5 B</td><td>1.795610</td><td>2.898987</td><td>1.749699</td><td>3.793168</td><td>0.000000</td></tr> <tr><td>6 B</td><td>3.371489</td><td>3.859138</td><td>3.859416</td><td>1.918167</td><td>3.365285</td></tr> <tr><td>7 Re</td><td>3.307416</td><td>3.730490</td><td>2.177375</td><td>2.197520</td><td>2.315544</td></tr> <tr><td>8 B</td><td>1.796801</td><td>1.728225</td><td>1.728111</td><td>3.934874</td><td>1.796551</td></tr> <tr><td>9 Re</td><td>3.141841</td><td>2.143114</td><td>2.149806</td><td>2.186409</td><td>3.137853</td></tr> <tr><td>10 B</td><td>1.811041</td><td>3.067029</td><td>3.066335</td><td>3.126320</td><td>1.807605</td></tr> <tr><td>11 Re</td><td>2.312580</td><td>2.175827</td><td>3.728892</td><td>2.193741</td><td>3.294357</td></tr> <tr> <th></th> <th>6</th> <th>7</th> <th>8</th> <th>9</th> <th>10</th> </tr> <tr><td>6 B</td><td>0.000000</td><td></td><td></td><td></td><td></td></tr> <tr><td>7 Re</td><td>2.083590</td><td>0.000000</td><td></td><td></td><td></td></tr> <tr><td>8 B</td><td>4.219572</td><td>3.277709</td><td>0.000000</td><td></td><td></td></tr> <tr><td>9 Re</td><td>3.488334</td><td>2.699687</td><td>2.361658</td><td>0.000000</td><td></td></tr> <tr><td>10 B</td><td>1.955963</td><td>2.232108</td><td>2.977870</td><td>3.477645</td><td>0.000000</td></tr> <tr><td>11 Re</td><td>2.081615</td><td>3.085872</td><td>3.273248</td><td>2.701075</td><td>2.221361</td></tr> </tbody> </table> |          | 1        | 2        | 3        | 4 | 5 | 1 B  | 0.000000 |  |  |  |  | 2 B | 1.755570 | 0.000000 |  |  |  | 3 B | 2.900783 | 2.972618 | 0.000000 |  |  | 4 B  | 3.796645 | 3.408982 | 3.417578 | 0.000000 |  | 5 B | 1.795610 | 2.898987 | 1.749699 | 3.793168 | 0.000000 | 6 B | 3.371489 | 3.859138 | 3.859416 | 1.918167 | 3.365285 | 7 Re | 3.307416 | 3.730490 | 2.177375 | 2.197520 | 2.315544 | 8 B | 1.796801 | 1.728225 | 1.728111 | 3.934874 | 1.796551 | 9 Re | 3.141841 | 2.143114 | 2.149806 | 2.186409 | 3.137853 | 10 B | 1.811041 | 3.067029 | 3.066335 | 3.126320 | 1.807605 | 11 Re | 2.312580 | 2.175827 | 3.728892 | 2.193741 | 3.294357 |  | 6 | 7 | 8 | 9 | 10 | 6 B | 0.000000 |  |  |  |  | 7 Re | 2.083590 | 0.000000 |  |  |  | 8 B | 4.219572 | 3.277709 | 0.000000 |  |  | 9 Re | 3.488334 | 2.699687 | 2.361658 | 0.000000 |  | 10 B | 1.955963 | 2.232108 | 2.977870 | 3.477645 | 0.000000 | 11 Re | 2.081615 | 3.085872 | 3.273248 | 2.701075 | 2.221361 |
|                                                                                                                     | 1                                                                                                                                                                                                                                                                                                                                                                                                                                                                                                                                                                                                                                                                                                                                                                                                                                                                                                                                                                                                                                                                                                                                                                                                                                                                                                                                                                                                                                                                                                                                                                                                                                                                                                                                                                                                                                                                                                                                                           | 2        | 3        | 4        | 5        |   |   |      |          |  |  |  |  |     |          |          |  |  |  |     |          |          |          |  |  |      |          |          |          |          |  |     |          |          |          |          |          |     |          |          |          |          |          |      |          |          |          |          |          |     |          |          |          |          |          |      |          |          |          |          |          |      |          |          |          |          |          |       |          |          |          |          |          |  |   |   |   |   |    |     |          |  |  |  |  |      |          |          |  |  |  |     |          |          |          |  |  |      |          |          |          |          |  |      |          |          |          |          |          |       |          |          |          |          |          |
| 1 B                                                                                                                 | 0.000000                                                                                                                                                                                                                                                                                                                                                                                                                                                                                                                                                                                                                                                                                                                                                                                                                                                                                                                                                                                                                                                                                                                                                                                                                                                                                                                                                                                                                                                                                                                                                                                                                                                                                                                                                                                                                                                                                                                                                    |          |          |          |          |   |   |      |          |  |  |  |  |     |          |          |  |  |  |     |          |          |          |  |  |      |          |          |          |          |  |     |          |          |          |          |          |     |          |          |          |          |          |      |          |          |          |          |          |     |          |          |          |          |          |      |          |          |          |          |          |      |          |          |          |          |          |       |          |          |          |          |          |  |   |   |   |   |    |     |          |  |  |  |  |      |          |          |  |  |  |     |          |          |          |  |  |      |          |          |          |          |  |      |          |          |          |          |          |       |          |          |          |          |          |
| 2 B                                                                                                                 | 1.755570                                                                                                                                                                                                                                                                                                                                                                                                                                                                                                                                                                                                                                                                                                                                                                                                                                                                                                                                                                                                                                                                                                                                                                                                                                                                                                                                                                                                                                                                                                                                                                                                                                                                                                                                                                                                                                                                                                                                                    | 0.000000 |          |          |          |   |   |      |          |  |  |  |  |     |          |          |  |  |  |     |          |          |          |  |  |      |          |          |          |          |  |     |          |          |          |          |          |     |          |          |          |          |          |      |          |          |          |          |          |     |          |          |          |          |          |      |          |          |          |          |          |      |          |          |          |          |          |       |          |          |          |          |          |  |   |   |   |   |    |     |          |  |  |  |  |      |          |          |  |  |  |     |          |          |          |  |  |      |          |          |          |          |  |      |          |          |          |          |          |       |          |          |          |          |          |
| 3 B                                                                                                                 | 2.900783                                                                                                                                                                                                                                                                                                                                                                                                                                                                                                                                                                                                                                                                                                                                                                                                                                                                                                                                                                                                                                                                                                                                                                                                                                                                                                                                                                                                                                                                                                                                                                                                                                                                                                                                                                                                                                                                                                                                                    | 2.972618 | 0.000000 |          |          |   |   |      |          |  |  |  |  |     |          |          |  |  |  |     |          |          |          |  |  |      |          |          |          |          |  |     |          |          |          |          |          |     |          |          |          |          |          |      |          |          |          |          |          |     |          |          |          |          |          |      |          |          |          |          |          |      |          |          |          |          |          |       |          |          |          |          |          |  |   |   |   |   |    |     |          |  |  |  |  |      |          |          |  |  |  |     |          |          |          |  |  |      |          |          |          |          |  |      |          |          |          |          |          |       |          |          |          |          |          |
| 4 B                                                                                                                 | 3.796645                                                                                                                                                                                                                                                                                                                                                                                                                                                                                                                                                                                                                                                                                                                                                                                                                                                                                                                                                                                                                                                                                                                                                                                                                                                                                                                                                                                                                                                                                                                                                                                                                                                                                                                                                                                                                                                                                                                                                    | 3.408982 | 3.417578 | 0.000000 |          |   |   |      |          |  |  |  |  |     |          |          |  |  |  |     |          |          |          |  |  |      |          |          |          |          |  |     |          |          |          |          |          |     |          |          |          |          |          |      |          |          |          |          |          |     |          |          |          |          |          |      |          |          |          |          |          |      |          |          |          |          |          |       |          |          |          |          |          |  |   |   |   |   |    |     |          |  |  |  |  |      |          |          |  |  |  |     |          |          |          |  |  |      |          |          |          |          |  |      |          |          |          |          |          |       |          |          |          |          |          |
| 5 B                                                                                                                 | 1.795610                                                                                                                                                                                                                                                                                                                                                                                                                                                                                                                                                                                                                                                                                                                                                                                                                                                                                                                                                                                                                                                                                                                                                                                                                                                                                                                                                                                                                                                                                                                                                                                                                                                                                                                                                                                                                                                                                                                                                    | 2.898987 | 1.749699 | 3.793168 | 0.000000 |   |   |      |          |  |  |  |  |     |          |          |  |  |  |     |          |          |          |  |  |      |          |          |          |          |  |     |          |          |          |          |          |     |          |          |          |          |          |      |          |          |          |          |          |     |          |          |          |          |          |      |          |          |          |          |          |      |          |          |          |          |          |       |          |          |          |          |          |  |   |   |   |   |    |     |          |  |  |  |  |      |          |          |  |  |  |     |          |          |          |  |  |      |          |          |          |          |  |      |          |          |          |          |          |       |          |          |          |          |          |
| 6 B                                                                                                                 | 3.371489                                                                                                                                                                                                                                                                                                                                                                                                                                                                                                                                                                                                                                                                                                                                                                                                                                                                                                                                                                                                                                                                                                                                                                                                                                                                                                                                                                                                                                                                                                                                                                                                                                                                                                                                                                                                                                                                                                                                                    | 3.859138 | 3.859416 | 1.918167 | 3.365285 |   |   |      |          |  |  |  |  |     |          |          |  |  |  |     |          |          |          |  |  |      |          |          |          |          |  |     |          |          |          |          |          |     |          |          |          |          |          |      |          |          |          |          |          |     |          |          |          |          |          |      |          |          |          |          |          |      |          |          |          |          |          |       |          |          |          |          |          |  |   |   |   |   |    |     |          |  |  |  |  |      |          |          |  |  |  |     |          |          |          |  |  |      |          |          |          |          |  |      |          |          |          |          |          |       |          |          |          |          |          |
| 7 Re                                                                                                                | 3.307416                                                                                                                                                                                                                                                                                                                                                                                                                                                                                                                                                                                                                                                                                                                                                                                                                                                                                                                                                                                                                                                                                                                                                                                                                                                                                                                                                                                                                                                                                                                                                                                                                                                                                                                                                                                                                                                                                                                                                    | 3.730490 | 2.177375 | 2.197520 | 2.315544 |   |   |      |          |  |  |  |  |     |          |          |  |  |  |     |          |          |          |  |  |      |          |          |          |          |  |     |          |          |          |          |          |     |          |          |          |          |          |      |          |          |          |          |          |     |          |          |          |          |          |      |          |          |          |          |          |      |          |          |          |          |          |       |          |          |          |          |          |  |   |   |   |   |    |     |          |  |  |  |  |      |          |          |  |  |  |     |          |          |          |  |  |      |          |          |          |          |  |      |          |          |          |          |          |       |          |          |          |          |          |
| 8 B                                                                                                                 | 1.796801                                                                                                                                                                                                                                                                                                                                                                                                                                                                                                                                                                                                                                                                                                                                                                                                                                                                                                                                                                                                                                                                                                                                                                                                                                                                                                                                                                                                                                                                                                                                                                                                                                                                                                                                                                                                                                                                                                                                                    | 1.728225 | 1.728111 | 3.934874 | 1.796551 |   |   |      |          |  |  |  |  |     |          |          |  |  |  |     |          |          |          |  |  |      |          |          |          |          |  |     |          |          |          |          |          |     |          |          |          |          |          |      |          |          |          |          |          |     |          |          |          |          |          |      |          |          |          |          |          |      |          |          |          |          |          |       |          |          |          |          |          |  |   |   |   |   |    |     |          |  |  |  |  |      |          |          |  |  |  |     |          |          |          |  |  |      |          |          |          |          |  |      |          |          |          |          |          |       |          |          |          |          |          |
| 9 Re                                                                                                                | 3.141841                                                                                                                                                                                                                                                                                                                                                                                                                                                                                                                                                                                                                                                                                                                                                                                                                                                                                                                                                                                                                                                                                                                                                                                                                                                                                                                                                                                                                                                                                                                                                                                                                                                                                                                                                                                                                                                                                                                                                    | 2.143114 | 2.149806 | 2.186409 | 3.137853 |   |   |      |          |  |  |  |  |     |          |          |  |  |  |     |          |          |          |  |  |      |          |          |          |          |  |     |          |          |          |          |          |     |          |          |          |          |          |      |          |          |          |          |          |     |          |          |          |          |          |      |          |          |          |          |          |      |          |          |          |          |          |       |          |          |          |          |          |  |   |   |   |   |    |     |          |  |  |  |  |      |          |          |  |  |  |     |          |          |          |  |  |      |          |          |          |          |  |      |          |          |          |          |          |       |          |          |          |          |          |
| 10 B                                                                                                                | 1.811041                                                                                                                                                                                                                                                                                                                                                                                                                                                                                                                                                                                                                                                                                                                                                                                                                                                                                                                                                                                                                                                                                                                                                                                                                                                                                                                                                                                                                                                                                                                                                                                                                                                                                                                                                                                                                                                                                                                                                    | 3.067029 | 3.066335 | 3.126320 | 1.807605 |   |   |      |          |  |  |  |  |     |          |          |  |  |  |     |          |          |          |  |  |      |          |          |          |          |  |     |          |          |          |          |          |     |          |          |          |          |          |      |          |          |          |          |          |     |          |          |          |          |          |      |          |          |          |          |          |      |          |          |          |          |          |       |          |          |          |          |          |  |   |   |   |   |    |     |          |  |  |  |  |      |          |          |  |  |  |     |          |          |          |  |  |      |          |          |          |          |  |      |          |          |          |          |          |       |          |          |          |          |          |
| 11 Re                                                                                                               | 2.312580                                                                                                                                                                                                                                                                                                                                                                                                                                                                                                                                                                                                                                                                                                                                                                                                                                                                                                                                                                                                                                                                                                                                                                                                                                                                                                                                                                                                                                                                                                                                                                                                                                                                                                                                                                                                                                                                                                                                                    | 2.175827 | 3.728892 | 2.193741 | 3.294357 |   |   |      |          |  |  |  |  |     |          |          |  |  |  |     |          |          |          |  |  |      |          |          |          |          |  |     |          |          |          |          |          |     |          |          |          |          |          |      |          |          |          |          |          |     |          |          |          |          |          |      |          |          |          |          |          |      |          |          |          |          |          |       |          |          |          |          |          |  |   |   |   |   |    |     |          |  |  |  |  |      |          |          |  |  |  |     |          |          |          |  |  |      |          |          |          |          |  |      |          |          |          |          |          |       |          |          |          |          |          |
|                                                                                                                     | 6                                                                                                                                                                                                                                                                                                                                                                                                                                                                                                                                                                                                                                                                                                                                                                                                                                                                                                                                                                                                                                                                                                                                                                                                                                                                                                                                                                                                                                                                                                                                                                                                                                                                                                                                                                                                                                                                                                                                                           | 7        | 8        | 9        | 10       |   |   |      |          |  |  |  |  |     |          |          |  |  |  |     |          |          |          |  |  |      |          |          |          |          |  |     |          |          |          |          |          |     |          |          |          |          |          |      |          |          |          |          |          |     |          |          |          |          |          |      |          |          |          |          |          |      |          |          |          |          |          |       |          |          |          |          |          |  |   |   |   |   |    |     |          |  |  |  |  |      |          |          |  |  |  |     |          |          |          |  |  |      |          |          |          |          |  |      |          |          |          |          |          |       |          |          |          |          |          |
| 6 B                                                                                                                 | 0.000000                                                                                                                                                                                                                                                                                                                                                                                                                                                                                                                                                                                                                                                                                                                                                                                                                                                                                                                                                                                                                                                                                                                                                                                                                                                                                                                                                                                                                                                                                                                                                                                                                                                                                                                                                                                                                                                                                                                                                    |          |          |          |          |   |   |      |          |  |  |  |  |     |          |          |  |  |  |     |          |          |          |  |  |      |          |          |          |          |  |     |          |          |          |          |          |     |          |          |          |          |          |      |          |          |          |          |          |     |          |          |          |          |          |      |          |          |          |          |          |      |          |          |          |          |          |       |          |          |          |          |          |  |   |   |   |   |    |     |          |  |  |  |  |      |          |          |  |  |  |     |          |          |          |  |  |      |          |          |          |          |  |      |          |          |          |          |          |       |          |          |          |          |          |
| 7 Re                                                                                                                | 2.083590                                                                                                                                                                                                                                                                                                                                                                                                                                                                                                                                                                                                                                                                                                                                                                                                                                                                                                                                                                                                                                                                                                                                                                                                                                                                                                                                                                                                                                                                                                                                                                                                                                                                                                                                                                                                                                                                                                                                                    | 0.000000 |          |          |          |   |   |      |          |  |  |  |  |     |          |          |  |  |  |     |          |          |          |  |  |      |          |          |          |          |  |     |          |          |          |          |          |     |          |          |          |          |          |      |          |          |          |          |          |     |          |          |          |          |          |      |          |          |          |          |          |      |          |          |          |          |          |       |          |          |          |          |          |  |   |   |   |   |    |     |          |  |  |  |  |      |          |          |  |  |  |     |          |          |          |  |  |      |          |          |          |          |  |      |          |          |          |          |          |       |          |          |          |          |          |
| 8 B                                                                                                                 | 4.219572                                                                                                                                                                                                                                                                                                                                                                                                                                                                                                                                                                                                                                                                                                                                                                                                                                                                                                                                                                                                                                                                                                                                                                                                                                                                                                                                                                                                                                                                                                                                                                                                                                                                                                                                                                                                                                                                                                                                                    | 3.277709 | 0.000000 |          |          |   |   |      |          |  |  |  |  |     |          |          |  |  |  |     |          |          |          |  |  |      |          |          |          |          |  |     |          |          |          |          |          |     |          |          |          |          |          |      |          |          |          |          |          |     |          |          |          |          |          |      |          |          |          |          |          |      |          |          |          |          |          |       |          |          |          |          |          |  |   |   |   |   |    |     |          |  |  |  |  |      |          |          |  |  |  |     |          |          |          |  |  |      |          |          |          |          |  |      |          |          |          |          |          |       |          |          |          |          |          |
| 9 Re                                                                                                                | 3.488334                                                                                                                                                                                                                                                                                                                                                                                                                                                                                                                                                                                                                                                                                                                                                                                                                                                                                                                                                                                                                                                                                                                                                                                                                                                                                                                                                                                                                                                                                                                                                                                                                                                                                                                                                                                                                                                                                                                                                    | 2.699687 | 2.361658 | 0.000000 |          |   |   |      |          |  |  |  |  |     |          |          |  |  |  |     |          |          |          |  |  |      |          |          |          |          |  |     |          |          |          |          |          |     |          |          |          |          |          |      |          |          |          |          |          |     |          |          |          |          |          |      |          |          |          |          |          |      |          |          |          |          |          |       |          |          |          |          |          |  |   |   |   |   |    |     |          |  |  |  |  |      |          |          |  |  |  |     |          |          |          |  |  |      |          |          |          |          |  |      |          |          |          |          |          |       |          |          |          |          |          |
| 10 B                                                                                                                | 1.955963                                                                                                                                                                                                                                                                                                                                                                                                                                                                                                                                                                                                                                                                                                                                                                                                                                                                                                                                                                                                                                                                                                                                                                                                                                                                                                                                                                                                                                                                                                                                                                                                                                                                                                                                                                                                                                                                                                                                                    | 2.232108 | 2.977870 | 3.477645 | 0.000000 |   |   |      |          |  |  |  |  |     |          |          |  |  |  |     |          |          |          |  |  |      |          |          |          |          |  |     |          |          |          |          |          |     |          |          |          |          |          |      |          |          |          |          |          |     |          |          |          |          |          |      |          |          |          |          |          |      |          |          |          |          |          |       |          |          |          |          |          |  |   |   |   |   |    |     |          |  |  |  |  |      |          |          |  |  |  |     |          |          |          |  |  |      |          |          |          |          |  |      |          |          |          |          |          |       |          |          |          |          |          |
| 11 Re                                                                                                               | 2.081615                                                                                                                                                                                                                                                                                                                                                                                                                                                                                                                                                                                                                                                                                                                                                                                                                                                                                                                                                                                                                                                                                                                                                                                                                                                                                                                                                                                                                                                                                                                                                                                                                                                                                                                                                                                                                                                                                                                                                    | 3.085872 | 3.273248 | 2.701075 | 2.221361 |   |   |      |          |  |  |  |  |     |          |          |  |  |  |     |          |          |          |  |  |      |          |          |          |          |  |     |          |          |          |          |          |     |          |          |          |          |          |      |          |          |          |          |          |     |          |          |          |          |          |      |          |          |          |          |          |      |          |          |          |          |          |       |          |          |          |          |          |  |   |   |   |   |    |     |          |  |  |  |  |      |          |          |  |  |  |     |          |          |          |  |  |      |          |          |          |          |  |      |          |          |          |          |          |       |          |          |          |          |          |



| 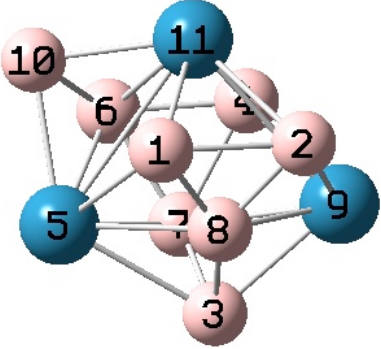 <p>5. -1019.3619606 +27.5 C1</p>  | <table border="1"> <thead> <tr> <th></th> <th>1</th> <th>2</th> <th>3</th> <th>4</th> <th>5</th> </tr> </thead> <tbody> <tr><td>1 B</td><td>0.000000</td><td></td><td></td><td></td><td></td></tr> <tr><td>2 B</td><td>1.889278</td><td>0.000000</td><td></td><td></td><td></td></tr> <tr><td>3 B</td><td>3.229621</td><td>3.082211</td><td>0.000000</td><td></td><td></td></tr> <tr><td>4 B</td><td>3.855136</td><td>3.273763</td><td>3.011562</td><td>0.000000</td><td></td></tr> <tr><td>5 Re</td><td>2.411429</td><td>3.532240</td><td>2.352449</td><td>3.402891</td><td>0.000000</td></tr> <tr><td>6 B</td><td>3.534087</td><td>3.871020</td><td>3.095237</td><td>1.777212</td><td>2.271301</td></tr> <tr><td>7 B</td><td>3.764631</td><td>3.659053</td><td>1.748162</td><td>1.783779</td><td>2.398326</td></tr> <tr><td>8 B</td><td>1.642288</td><td>1.629781</td><td>1.699954</td><td>3.081217</td><td>2.179703</td></tr> <tr><td>9 Re</td><td>3.420157</td><td>2.155857</td><td>2.114369</td><td>2.130121</td><td>3.643011</td></tr> <tr><td>10 B</td><td>2.855980</td><td>3.923594</td><td>3.981838</td><td>3.192912</td><td>2.138751</td></tr> <tr><td>11 Re</td><td>2.246753</td><td>2.277852</td><td>3.570002</td><td>2.211771</td><td>2.917831</td></tr> <tr> <td></td> <td>6</td> <td>7</td> <td>8</td> <td>9</td> <td>10</td> </tr> <tr><td>6 B</td><td>0.000000</td><td></td><td></td><td></td><td></td></tr> <tr><td>7 B</td><td>1.721138</td><td>0.000000</td><td></td><td></td><td></td></tr> <tr><td>8 B</td><td>3.154963</td><td>2.630667</td><td>0.000000</td><td></td><td></td></tr> <tr><td>9 Re</td><td>3.322558</td><td>2.362325</td><td>2.097491</td><td>0.000000</td><td></td></tr> <tr><td>10 B</td><td>1.805163</td><td>3.226630</td><td>3.361223</td><td>4.331759</td><td>0.000000</td></tr> <tr><td>11 Re</td><td>2.243556</td><td>3.061973</td><td>2.532951</td><td>2.915019</td><td>2.081052</td></tr> </tbody> </table> <p>Bridge Re5-H-B1 Re5-H 1.7531 B1-H 1.4295</p> |          | 1        | 2        | 3        | 4 | 5 | 1 B | 0.000000 |  |  |  |  | 2 B | 1.889278 | 0.000000 |  |  |  | 3 B  | 3.229621 | 3.082211 | 0.000000 |  |  | 4 B | 3.855136 | 3.273763 | 3.011562 | 0.000000 |  | 5 Re | 2.411429 | 3.532240 | 2.352449 | 3.402891 | 0.000000 | 6 B | 3.534087 | 3.871020 | 3.095237 | 1.777212 | 2.271301 | 7 B  | 3.764631 | 3.659053 | 1.748162 | 1.783779 | 2.398326 | 8 B | 1.642288 | 1.629781 | 1.699954 | 3.081217 | 2.179703 | 9 Re | 3.420157 | 2.155857 | 2.114369 | 2.130121 | 3.643011 | 10 B | 2.855980 | 3.923594 | 3.981838 | 3.192912 | 2.138751 | 11 Re | 2.246753 | 2.277852 | 3.570002 | 2.211771 | 2.917831 |  | 6 | 7 | 8 | 9 | 10 | 6 B | 0.000000 |  |  |  |  | 7 B  | 1.721138 | 0.000000 |  |  |  | 8 B | 3.154963 | 2.630667 | 0.000000 |  |  | 9 Re | 3.322558 | 2.362325 | 2.097491 | 0.000000 |  | 10 B | 1.805163 | 3.226630 | 3.361223 | 4.331759 | 0.000000 | 11 Re | 2.243556 | 3.061973 | 2.532951 | 2.915019 | 2.081052 |
|---------------------------------------------------------------------------------------------------------------------|------------------------------------------------------------------------------------------------------------------------------------------------------------------------------------------------------------------------------------------------------------------------------------------------------------------------------------------------------------------------------------------------------------------------------------------------------------------------------------------------------------------------------------------------------------------------------------------------------------------------------------------------------------------------------------------------------------------------------------------------------------------------------------------------------------------------------------------------------------------------------------------------------------------------------------------------------------------------------------------------------------------------------------------------------------------------------------------------------------------------------------------------------------------------------------------------------------------------------------------------------------------------------------------------------------------------------------------------------------------------------------------------------------------------------------------------------------------------------------------------------------------------------------------------------------------------------------------------------------------------------------------------------------------------------------------------------------------------------------------------------------------------------------------------------------------------------------------------------------------------------------------------------------------------------------------------------------------------------------------------------------|----------|----------|----------|----------|---|---|-----|----------|--|--|--|--|-----|----------|----------|--|--|--|------|----------|----------|----------|--|--|-----|----------|----------|----------|----------|--|------|----------|----------|----------|----------|----------|-----|----------|----------|----------|----------|----------|------|----------|----------|----------|----------|----------|-----|----------|----------|----------|----------|----------|------|----------|----------|----------|----------|----------|------|----------|----------|----------|----------|----------|-------|----------|----------|----------|----------|----------|--|---|---|---|---|----|-----|----------|--|--|--|--|------|----------|----------|--|--|--|-----|----------|----------|----------|--|--|------|----------|----------|----------|----------|--|------|----------|----------|----------|----------|----------|-------|----------|----------|----------|----------|----------|
|                                                                                                                     | 1                                                                                                                                                                                                                                                                                                                                                                                                                                                                                                                                                                                                                                                                                                                                                                                                                                                                                                                                                                                                                                                                                                                                                                                                                                                                                                                                                                                                                                                                                                                                                                                                                                                                                                                                                                                                                                                                                                                                                                                                          | 2        | 3        | 4        | 5        |   |   |     |          |  |  |  |  |     |          |          |  |  |  |      |          |          |          |  |  |     |          |          |          |          |  |      |          |          |          |          |          |     |          |          |          |          |          |      |          |          |          |          |          |     |          |          |          |          |          |      |          |          |          |          |          |      |          |          |          |          |          |       |          |          |          |          |          |  |   |   |   |   |    |     |          |  |  |  |  |      |          |          |  |  |  |     |          |          |          |  |  |      |          |          |          |          |  |      |          |          |          |          |          |       |          |          |          |          |          |
| 1 B                                                                                                                 | 0.000000                                                                                                                                                                                                                                                                                                                                                                                                                                                                                                                                                                                                                                                                                                                                                                                                                                                                                                                                                                                                                                                                                                                                                                                                                                                                                                                                                                                                                                                                                                                                                                                                                                                                                                                                                                                                                                                                                                                                                                                                   |          |          |          |          |   |   |     |          |  |  |  |  |     |          |          |  |  |  |      |          |          |          |  |  |     |          |          |          |          |  |      |          |          |          |          |          |     |          |          |          |          |          |      |          |          |          |          |          |     |          |          |          |          |          |      |          |          |          |          |          |      |          |          |          |          |          |       |          |          |          |          |          |  |   |   |   |   |    |     |          |  |  |  |  |      |          |          |  |  |  |     |          |          |          |  |  |      |          |          |          |          |  |      |          |          |          |          |          |       |          |          |          |          |          |
| 2 B                                                                                                                 | 1.889278                                                                                                                                                                                                                                                                                                                                                                                                                                                                                                                                                                                                                                                                                                                                                                                                                                                                                                                                                                                                                                                                                                                                                                                                                                                                                                                                                                                                                                                                                                                                                                                                                                                                                                                                                                                                                                                                                                                                                                                                   | 0.000000 |          |          |          |   |   |     |          |  |  |  |  |     |          |          |  |  |  |      |          |          |          |  |  |     |          |          |          |          |  |      |          |          |          |          |          |     |          |          |          |          |          |      |          |          |          |          |          |     |          |          |          |          |          |      |          |          |          |          |          |      |          |          |          |          |          |       |          |          |          |          |          |  |   |   |   |   |    |     |          |  |  |  |  |      |          |          |  |  |  |     |          |          |          |  |  |      |          |          |          |          |  |      |          |          |          |          |          |       |          |          |          |          |          |
| 3 B                                                                                                                 | 3.229621                                                                                                                                                                                                                                                                                                                                                                                                                                                                                                                                                                                                                                                                                                                                                                                                                                                                                                                                                                                                                                                                                                                                                                                                                                                                                                                                                                                                                                                                                                                                                                                                                                                                                                                                                                                                                                                                                                                                                                                                   | 3.082211 | 0.000000 |          |          |   |   |     |          |  |  |  |  |     |          |          |  |  |  |      |          |          |          |  |  |     |          |          |          |          |  |      |          |          |          |          |          |     |          |          |          |          |          |      |          |          |          |          |          |     |          |          |          |          |          |      |          |          |          |          |          |      |          |          |          |          |          |       |          |          |          |          |          |  |   |   |   |   |    |     |          |  |  |  |  |      |          |          |  |  |  |     |          |          |          |  |  |      |          |          |          |          |  |      |          |          |          |          |          |       |          |          |          |          |          |
| 4 B                                                                                                                 | 3.855136                                                                                                                                                                                                                                                                                                                                                                                                                                                                                                                                                                                                                                                                                                                                                                                                                                                                                                                                                                                                                                                                                                                                                                                                                                                                                                                                                                                                                                                                                                                                                                                                                                                                                                                                                                                                                                                                                                                                                                                                   | 3.273763 | 3.011562 | 0.000000 |          |   |   |     |          |  |  |  |  |     |          |          |  |  |  |      |          |          |          |  |  |     |          |          |          |          |  |      |          |          |          |          |          |     |          |          |          |          |          |      |          |          |          |          |          |     |          |          |          |          |          |      |          |          |          |          |          |      |          |          |          |          |          |       |          |          |          |          |          |  |   |   |   |   |    |     |          |  |  |  |  |      |          |          |  |  |  |     |          |          |          |  |  |      |          |          |          |          |  |      |          |          |          |          |          |       |          |          |          |          |          |
| 5 Re                                                                                                                | 2.411429                                                                                                                                                                                                                                                                                                                                                                                                                                                                                                                                                                                                                                                                                                                                                                                                                                                                                                                                                                                                                                                                                                                                                                                                                                                                                                                                                                                                                                                                                                                                                                                                                                                                                                                                                                                                                                                                                                                                                                                                   | 3.532240 | 2.352449 | 3.402891 | 0.000000 |   |   |     |          |  |  |  |  |     |          |          |  |  |  |      |          |          |          |  |  |     |          |          |          |          |  |      |          |          |          |          |          |     |          |          |          |          |          |      |          |          |          |          |          |     |          |          |          |          |          |      |          |          |          |          |          |      |          |          |          |          |          |       |          |          |          |          |          |  |   |   |   |   |    |     |          |  |  |  |  |      |          |          |  |  |  |     |          |          |          |  |  |      |          |          |          |          |  |      |          |          |          |          |          |       |          |          |          |          |          |
| 6 B                                                                                                                 | 3.534087                                                                                                                                                                                                                                                                                                                                                                                                                                                                                                                                                                                                                                                                                                                                                                                                                                                                                                                                                                                                                                                                                                                                                                                                                                                                                                                                                                                                                                                                                                                                                                                                                                                                                                                                                                                                                                                                                                                                                                                                   | 3.871020 | 3.095237 | 1.777212 | 2.271301 |   |   |     |          |  |  |  |  |     |          |          |  |  |  |      |          |          |          |  |  |     |          |          |          |          |  |      |          |          |          |          |          |     |          |          |          |          |          |      |          |          |          |          |          |     |          |          |          |          |          |      |          |          |          |          |          |      |          |          |          |          |          |       |          |          |          |          |          |  |   |   |   |   |    |     |          |  |  |  |  |      |          |          |  |  |  |     |          |          |          |  |  |      |          |          |          |          |  |      |          |          |          |          |          |       |          |          |          |          |          |
| 7 B                                                                                                                 | 3.764631                                                                                                                                                                                                                                                                                                                                                                                                                                                                                                                                                                                                                                                                                                                                                                                                                                                                                                                                                                                                                                                                                                                                                                                                                                                                                                                                                                                                                                                                                                                                                                                                                                                                                                                                                                                                                                                                                                                                                                                                   | 3.659053 | 1.748162 | 1.783779 | 2.398326 |   |   |     |          |  |  |  |  |     |          |          |  |  |  |      |          |          |          |  |  |     |          |          |          |          |  |      |          |          |          |          |          |     |          |          |          |          |          |      |          |          |          |          |          |     |          |          |          |          |          |      |          |          |          |          |          |      |          |          |          |          |          |       |          |          |          |          |          |  |   |   |   |   |    |     |          |  |  |  |  |      |          |          |  |  |  |     |          |          |          |  |  |      |          |          |          |          |  |      |          |          |          |          |          |       |          |          |          |          |          |
| 8 B                                                                                                                 | 1.642288                                                                                                                                                                                                                                                                                                                                                                                                                                                                                                                                                                                                                                                                                                                                                                                                                                                                                                                                                                                                                                                                                                                                                                                                                                                                                                                                                                                                                                                                                                                                                                                                                                                                                                                                                                                                                                                                                                                                                                                                   | 1.629781 | 1.699954 | 3.081217 | 2.179703 |   |   |     |          |  |  |  |  |     |          |          |  |  |  |      |          |          |          |  |  |     |          |          |          |          |  |      |          |          |          |          |          |     |          |          |          |          |          |      |          |          |          |          |          |     |          |          |          |          |          |      |          |          |          |          |          |      |          |          |          |          |          |       |          |          |          |          |          |  |   |   |   |   |    |     |          |  |  |  |  |      |          |          |  |  |  |     |          |          |          |  |  |      |          |          |          |          |  |      |          |          |          |          |          |       |          |          |          |          |          |
| 9 Re                                                                                                                | 3.420157                                                                                                                                                                                                                                                                                                                                                                                                                                                                                                                                                                                                                                                                                                                                                                                                                                                                                                                                                                                                                                                                                                                                                                                                                                                                                                                                                                                                                                                                                                                                                                                                                                                                                                                                                                                                                                                                                                                                                                                                   | 2.155857 | 2.114369 | 2.130121 | 3.643011 |   |   |     |          |  |  |  |  |     |          |          |  |  |  |      |          |          |          |  |  |     |          |          |          |          |  |      |          |          |          |          |          |     |          |          |          |          |          |      |          |          |          |          |          |     |          |          |          |          |          |      |          |          |          |          |          |      |          |          |          |          |          |       |          |          |          |          |          |  |   |   |   |   |    |     |          |  |  |  |  |      |          |          |  |  |  |     |          |          |          |  |  |      |          |          |          |          |  |      |          |          |          |          |          |       |          |          |          |          |          |
| 10 B                                                                                                                | 2.855980                                                                                                                                                                                                                                                                                                                                                                                                                                                                                                                                                                                                                                                                                                                                                                                                                                                                                                                                                                                                                                                                                                                                                                                                                                                                                                                                                                                                                                                                                                                                                                                                                                                                                                                                                                                                                                                                                                                                                                                                   | 3.923594 | 3.981838 | 3.192912 | 2.138751 |   |   |     |          |  |  |  |  |     |          |          |  |  |  |      |          |          |          |  |  |     |          |          |          |          |  |      |          |          |          |          |          |     |          |          |          |          |          |      |          |          |          |          |          |     |          |          |          |          |          |      |          |          |          |          |          |      |          |          |          |          |          |       |          |          |          |          |          |  |   |   |   |   |    |     |          |  |  |  |  |      |          |          |  |  |  |     |          |          |          |  |  |      |          |          |          |          |  |      |          |          |          |          |          |       |          |          |          |          |          |
| 11 Re                                                                                                               | 2.246753                                                                                                                                                                                                                                                                                                                                                                                                                                                                                                                                                                                                                                                                                                                                                                                                                                                                                                                                                                                                                                                                                                                                                                                                                                                                                                                                                                                                                                                                                                                                                                                                                                                                                                                                                                                                                                                                                                                                                                                                   | 2.277852 | 3.570002 | 2.211771 | 2.917831 |   |   |     |          |  |  |  |  |     |          |          |  |  |  |      |          |          |          |  |  |     |          |          |          |          |  |      |          |          |          |          |          |     |          |          |          |          |          |      |          |          |          |          |          |     |          |          |          |          |          |      |          |          |          |          |          |      |          |          |          |          |          |       |          |          |          |          |          |  |   |   |   |   |    |     |          |  |  |  |  |      |          |          |  |  |  |     |          |          |          |  |  |      |          |          |          |          |  |      |          |          |          |          |          |       |          |          |          |          |          |
|                                                                                                                     | 6                                                                                                                                                                                                                                                                                                                                                                                                                                                                                                                                                                                                                                                                                                                                                                                                                                                                                                                                                                                                                                                                                                                                                                                                                                                                                                                                                                                                                                                                                                                                                                                                                                                                                                                                                                                                                                                                                                                                                                                                          | 7        | 8        | 9        | 10       |   |   |     |          |  |  |  |  |     |          |          |  |  |  |      |          |          |          |  |  |     |          |          |          |          |  |      |          |          |          |          |          |     |          |          |          |          |          |      |          |          |          |          |          |     |          |          |          |          |          |      |          |          |          |          |          |      |          |          |          |          |          |       |          |          |          |          |          |  |   |   |   |   |    |     |          |  |  |  |  |      |          |          |  |  |  |     |          |          |          |  |  |      |          |          |          |          |  |      |          |          |          |          |          |       |          |          |          |          |          |
| 6 B                                                                                                                 | 0.000000                                                                                                                                                                                                                                                                                                                                                                                                                                                                                                                                                                                                                                                                                                                                                                                                                                                                                                                                                                                                                                                                                                                                                                                                                                                                                                                                                                                                                                                                                                                                                                                                                                                                                                                                                                                                                                                                                                                                                                                                   |          |          |          |          |   |   |     |          |  |  |  |  |     |          |          |  |  |  |      |          |          |          |  |  |     |          |          |          |          |  |      |          |          |          |          |          |     |          |          |          |          |          |      |          |          |          |          |          |     |          |          |          |          |          |      |          |          |          |          |          |      |          |          |          |          |          |       |          |          |          |          |          |  |   |   |   |   |    |     |          |  |  |  |  |      |          |          |  |  |  |     |          |          |          |  |  |      |          |          |          |          |  |      |          |          |          |          |          |       |          |          |          |          |          |
| 7 B                                                                                                                 | 1.721138                                                                                                                                                                                                                                                                                                                                                                                                                                                                                                                                                                                                                                                                                                                                                                                                                                                                                                                                                                                                                                                                                                                                                                                                                                                                                                                                                                                                                                                                                                                                                                                                                                                                                                                                                                                                                                                                                                                                                                                                   | 0.000000 |          |          |          |   |   |     |          |  |  |  |  |     |          |          |  |  |  |      |          |          |          |  |  |     |          |          |          |          |  |      |          |          |          |          |          |     |          |          |          |          |          |      |          |          |          |          |          |     |          |          |          |          |          |      |          |          |          |          |          |      |          |          |          |          |          |       |          |          |          |          |          |  |   |   |   |   |    |     |          |  |  |  |  |      |          |          |  |  |  |     |          |          |          |  |  |      |          |          |          |          |  |      |          |          |          |          |          |       |          |          |          |          |          |
| 8 B                                                                                                                 | 3.154963                                                                                                                                                                                                                                                                                                                                                                                                                                                                                                                                                                                                                                                                                                                                                                                                                                                                                                                                                                                                                                                                                                                                                                                                                                                                                                                                                                                                                                                                                                                                                                                                                                                                                                                                                                                                                                                                                                                                                                                                   | 2.630667 | 0.000000 |          |          |   |   |     |          |  |  |  |  |     |          |          |  |  |  |      |          |          |          |  |  |     |          |          |          |          |  |      |          |          |          |          |          |     |          |          |          |          |          |      |          |          |          |          |          |     |          |          |          |          |          |      |          |          |          |          |          |      |          |          |          |          |          |       |          |          |          |          |          |  |   |   |   |   |    |     |          |  |  |  |  |      |          |          |  |  |  |     |          |          |          |  |  |      |          |          |          |          |  |      |          |          |          |          |          |       |          |          |          |          |          |
| 9 Re                                                                                                                | 3.322558                                                                                                                                                                                                                                                                                                                                                                                                                                                                                                                                                                                                                                                                                                                                                                                                                                                                                                                                                                                                                                                                                                                                                                                                                                                                                                                                                                                                                                                                                                                                                                                                                                                                                                                                                                                                                                                                                                                                                                                                   | 2.362325 | 2.097491 | 0.000000 |          |   |   |     |          |  |  |  |  |     |          |          |  |  |  |      |          |          |          |  |  |     |          |          |          |          |  |      |          |          |          |          |          |     |          |          |          |          |          |      |          |          |          |          |          |     |          |          |          |          |          |      |          |          |          |          |          |      |          |          |          |          |          |       |          |          |          |          |          |  |   |   |   |   |    |     |          |  |  |  |  |      |          |          |  |  |  |     |          |          |          |  |  |      |          |          |          |          |  |      |          |          |          |          |          |       |          |          |          |          |          |
| 10 B                                                                                                                | 1.805163                                                                                                                                                                                                                                                                                                                                                                                                                                                                                                                                                                                                                                                                                                                                                                                                                                                                                                                                                                                                                                                                                                                                                                                                                                                                                                                                                                                                                                                                                                                                                                                                                                                                                                                                                                                                                                                                                                                                                                                                   | 3.226630 | 3.361223 | 4.331759 | 0.000000 |   |   |     |          |  |  |  |  |     |          |          |  |  |  |      |          |          |          |  |  |     |          |          |          |          |  |      |          |          |          |          |          |     |          |          |          |          |          |      |          |          |          |          |          |     |          |          |          |          |          |      |          |          |          |          |          |      |          |          |          |          |          |       |          |          |          |          |          |  |   |   |   |   |    |     |          |  |  |  |  |      |          |          |  |  |  |     |          |          |          |  |  |      |          |          |          |          |  |      |          |          |          |          |          |       |          |          |          |          |          |
| 11 Re                                                                                                               | 2.243556                                                                                                                                                                                                                                                                                                                                                                                                                                                                                                                                                                                                                                                                                                                                                                                                                                                                                                                                                                                                                                                                                                                                                                                                                                                                                                                                                                                                                                                                                                                                                                                                                                                                                                                                                                                                                                                                                                                                                                                                   | 3.061973 | 2.532951 | 2.915019 | 2.081052 |   |   |     |          |  |  |  |  |     |          |          |  |  |  |      |          |          |          |  |  |     |          |          |          |          |  |      |          |          |          |          |          |     |          |          |          |          |          |      |          |          |          |          |          |     |          |          |          |          |          |      |          |          |          |          |          |      |          |          |          |          |          |       |          |          |          |          |          |  |   |   |   |   |    |     |          |  |  |  |  |      |          |          |  |  |  |     |          |          |          |  |  |      |          |          |          |          |  |      |          |          |          |          |          |       |          |          |          |          |          |
|  <p>6. -1019.3564185 +31.0 C1</p> | <table border="1"> <thead> <tr> <th></th> <th>1</th> <th>2</th> <th>3</th> <th>4</th> <th>5</th> </tr> </thead> <tbody> <tr><td>1 B</td><td>0.000000</td><td></td><td></td><td></td><td></td></tr> <tr><td>2 B</td><td>1.852193</td><td>0.000000</td><td></td><td></td><td></td></tr> <tr><td>3 Re</td><td>3.662039</td><td>2.311494</td><td>0.000000</td><td></td><td></td></tr> <tr><td>4 B</td><td>3.860872</td><td>3.492468</td><td>2.127566</td><td>0.000000</td><td></td></tr> <tr><td>5 B</td><td>3.223542</td><td>3.792586</td><td>3.502649</td><td>1.828826</td><td>0.000000</td></tr> <tr><td>6 B</td><td>1.809107</td><td>3.131026</td><td>3.973756</td><td>3.140398</td><td>1.782834</td></tr> <tr><td>7 Re</td><td>2.260467</td><td>2.319963</td><td>2.479193</td><td>2.269844</td><td>2.142423</td></tr> <tr><td>8 B</td><td>1.809132</td><td>1.744012</td><td>3.375505</td><td>3.938655</td><td>3.820559</td></tr> <tr><td>9 B</td><td>1.763472</td><td>2.951359</td><td>4.297747</td><td>3.996853</td><td>3.117115</td></tr> <tr><td>10 B</td><td>3.009225</td><td>1.796954</td><td>2.121804</td><td>3.218687</td><td>3.919397</td></tr> <tr><td>11 Re</td><td>2.921911</td><td>2.993627</td><td>2.951575</td><td>2.231772</td><td>2.164733</td></tr> <tr> <td></td> <td>6</td> <td>7</td> <td>8</td> <td>9</td> <td>10</td> </tr> <tr><td>6 B</td><td>0.000000</td><td></td><td></td><td></td><td></td></tr> <tr><td>7 Re</td><td>2.194036</td><td>0.000000</td><td></td><td></td><td></td></tr> <tr><td>8 B</td><td>2.801321</td><td>3.253207</td><td>0.000000</td><td></td><td></td></tr> <tr><td>9 B</td><td>1.712802</td><td>3.308800</td><td>1.707325</td><td>0.000000</td><td></td></tr> <tr><td>10 B</td><td>3.669036</td><td>3.287751</td><td>1.733310</td><td>3.091451</td><td>0.000000</td></tr> <tr><td>11 Re</td><td>2.298120</td><td>2.897396</td><td>2.360619</td><td>2.195579</td><td>2.263414</td></tr> </tbody> </table>                                                 |          | 1        | 2        | 3        | 4 | 5 | 1 B | 0.000000 |  |  |  |  | 2 B | 1.852193 | 0.000000 |  |  |  | 3 Re | 3.662039 | 2.311494 | 0.000000 |  |  | 4 B | 3.860872 | 3.492468 | 2.127566 | 0.000000 |  | 5 B  | 3.223542 | 3.792586 | 3.502649 | 1.828826 | 0.000000 | 6 B | 1.809107 | 3.131026 | 3.973756 | 3.140398 | 1.782834 | 7 Re | 2.260467 | 2.319963 | 2.479193 | 2.269844 | 2.142423 | 8 B | 1.809132 | 1.744012 | 3.375505 | 3.938655 | 3.820559 | 9 B  | 1.763472 | 2.951359 | 4.297747 | 3.996853 | 3.117115 | 10 B | 3.009225 | 1.796954 | 2.121804 | 3.218687 | 3.919397 | 11 Re | 2.921911 | 2.993627 | 2.951575 | 2.231772 | 2.164733 |  | 6 | 7 | 8 | 9 | 10 | 6 B | 0.000000 |  |  |  |  | 7 Re | 2.194036 | 0.000000 |  |  |  | 8 B | 2.801321 | 3.253207 | 0.000000 |  |  | 9 B  | 1.712802 | 3.308800 | 1.707325 | 0.000000 |  | 10 B | 3.669036 | 3.287751 | 1.733310 | 3.091451 | 0.000000 | 11 Re | 2.298120 | 2.897396 | 2.360619 | 2.195579 | 2.263414 |
|                                                                                                                     | 1                                                                                                                                                                                                                                                                                                                                                                                                                                                                                                                                                                                                                                                                                                                                                                                                                                                                                                                                                                                                                                                                                                                                                                                                                                                                                                                                                                                                                                                                                                                                                                                                                                                                                                                                                                                                                                                                                                                                                                                                          | 2        | 3        | 4        | 5        |   |   |     |          |  |  |  |  |     |          |          |  |  |  |      |          |          |          |  |  |     |          |          |          |          |  |      |          |          |          |          |          |     |          |          |          |          |          |      |          |          |          |          |          |     |          |          |          |          |          |      |          |          |          |          |          |      |          |          |          |          |          |       |          |          |          |          |          |  |   |   |   |   |    |     |          |  |  |  |  |      |          |          |  |  |  |     |          |          |          |  |  |      |          |          |          |          |  |      |          |          |          |          |          |       |          |          |          |          |          |
| 1 B                                                                                                                 | 0.000000                                                                                                                                                                                                                                                                                                                                                                                                                                                                                                                                                                                                                                                                                                                                                                                                                                                                                                                                                                                                                                                                                                                                                                                                                                                                                                                                                                                                                                                                                                                                                                                                                                                                                                                                                                                                                                                                                                                                                                                                   |          |          |          |          |   |   |     |          |  |  |  |  |     |          |          |  |  |  |      |          |          |          |  |  |     |          |          |          |          |  |      |          |          |          |          |          |     |          |          |          |          |          |      |          |          |          |          |          |     |          |          |          |          |          |      |          |          |          |          |          |      |          |          |          |          |          |       |          |          |          |          |          |  |   |   |   |   |    |     |          |  |  |  |  |      |          |          |  |  |  |     |          |          |          |  |  |      |          |          |          |          |  |      |          |          |          |          |          |       |          |          |          |          |          |
| 2 B                                                                                                                 | 1.852193                                                                                                                                                                                                                                                                                                                                                                                                                                                                                                                                                                                                                                                                                                                                                                                                                                                                                                                                                                                                                                                                                                                                                                                                                                                                                                                                                                                                                                                                                                                                                                                                                                                                                                                                                                                                                                                                                                                                                                                                   | 0.000000 |          |          |          |   |   |     |          |  |  |  |  |     |          |          |  |  |  |      |          |          |          |  |  |     |          |          |          |          |  |      |          |          |          |          |          |     |          |          |          |          |          |      |          |          |          |          |          |     |          |          |          |          |          |      |          |          |          |          |          |      |          |          |          |          |          |       |          |          |          |          |          |  |   |   |   |   |    |     |          |  |  |  |  |      |          |          |  |  |  |     |          |          |          |  |  |      |          |          |          |          |  |      |          |          |          |          |          |       |          |          |          |          |          |
| 3 Re                                                                                                                | 3.662039                                                                                                                                                                                                                                                                                                                                                                                                                                                                                                                                                                                                                                                                                                                                                                                                                                                                                                                                                                                                                                                                                                                                                                                                                                                                                                                                                                                                                                                                                                                                                                                                                                                                                                                                                                                                                                                                                                                                                                                                   | 2.311494 | 0.000000 |          |          |   |   |     |          |  |  |  |  |     |          |          |  |  |  |      |          |          |          |  |  |     |          |          |          |          |  |      |          |          |          |          |          |     |          |          |          |          |          |      |          |          |          |          |          |     |          |          |          |          |          |      |          |          |          |          |          |      |          |          |          |          |          |       |          |          |          |          |          |  |   |   |   |   |    |     |          |  |  |  |  |      |          |          |  |  |  |     |          |          |          |  |  |      |          |          |          |          |  |      |          |          |          |          |          |       |          |          |          |          |          |
| 4 B                                                                                                                 | 3.860872                                                                                                                                                                                                                                                                                                                                                                                                                                                                                                                                                                                                                                                                                                                                                                                                                                                                                                                                                                                                                                                                                                                                                                                                                                                                                                                                                                                                                                                                                                                                                                                                                                                                                                                                                                                                                                                                                                                                                                                                   | 3.492468 | 2.127566 | 0.000000 |          |   |   |     |          |  |  |  |  |     |          |          |  |  |  |      |          |          |          |  |  |     |          |          |          |          |  |      |          |          |          |          |          |     |          |          |          |          |          |      |          |          |          |          |          |     |          |          |          |          |          |      |          |          |          |          |          |      |          |          |          |          |          |       |          |          |          |          |          |  |   |   |   |   |    |     |          |  |  |  |  |      |          |          |  |  |  |     |          |          |          |  |  |      |          |          |          |          |  |      |          |          |          |          |          |       |          |          |          |          |          |
| 5 B                                                                                                                 | 3.223542                                                                                                                                                                                                                                                                                                                                                                                                                                                                                                                                                                                                                                                                                                                                                                                                                                                                                                                                                                                                                                                                                                                                                                                                                                                                                                                                                                                                                                                                                                                                                                                                                                                                                                                                                                                                                                                                                                                                                                                                   | 3.792586 | 3.502649 | 1.828826 | 0.000000 |   |   |     |          |  |  |  |  |     |          |          |  |  |  |      |          |          |          |  |  |     |          |          |          |          |  |      |          |          |          |          |          |     |          |          |          |          |          |      |          |          |          |          |          |     |          |          |          |          |          |      |          |          |          |          |          |      |          |          |          |          |          |       |          |          |          |          |          |  |   |   |   |   |    |     |          |  |  |  |  |      |          |          |  |  |  |     |          |          |          |  |  |      |          |          |          |          |  |      |          |          |          |          |          |       |          |          |          |          |          |
| 6 B                                                                                                                 | 1.809107                                                                                                                                                                                                                                                                                                                                                                                                                                                                                                                                                                                                                                                                                                                                                                                                                                                                                                                                                                                                                                                                                                                                                                                                                                                                                                                                                                                                                                                                                                                                                                                                                                                                                                                                                                                                                                                                                                                                                                                                   | 3.131026 | 3.973756 | 3.140398 | 1.782834 |   |   |     |          |  |  |  |  |     |          |          |  |  |  |      |          |          |          |  |  |     |          |          |          |          |  |      |          |          |          |          |          |     |          |          |          |          |          |      |          |          |          |          |          |     |          |          |          |          |          |      |          |          |          |          |          |      |          |          |          |          |          |       |          |          |          |          |          |  |   |   |   |   |    |     |          |  |  |  |  |      |          |          |  |  |  |     |          |          |          |  |  |      |          |          |          |          |  |      |          |          |          |          |          |       |          |          |          |          |          |
| 7 Re                                                                                                                | 2.260467                                                                                                                                                                                                                                                                                                                                                                                                                                                                                                                                                                                                                                                                                                                                                                                                                                                                                                                                                                                                                                                                                                                                                                                                                                                                                                                                                                                                                                                                                                                                                                                                                                                                                                                                                                                                                                                                                                                                                                                                   | 2.319963 | 2.479193 | 2.269844 | 2.142423 |   |   |     |          |  |  |  |  |     |          |          |  |  |  |      |          |          |          |  |  |     |          |          |          |          |  |      |          |          |          |          |          |     |          |          |          |          |          |      |          |          |          |          |          |     |          |          |          |          |          |      |          |          |          |          |          |      |          |          |          |          |          |       |          |          |          |          |          |  |   |   |   |   |    |     |          |  |  |  |  |      |          |          |  |  |  |     |          |          |          |  |  |      |          |          |          |          |  |      |          |          |          |          |          |       |          |          |          |          |          |
| 8 B                                                                                                                 | 1.809132                                                                                                                                                                                                                                                                                                                                                                                                                                                                                                                                                                                                                                                                                                                                                                                                                                                                                                                                                                                                                                                                                                                                                                                                                                                                                                                                                                                                                                                                                                                                                                                                                                                                                                                                                                                                                                                                                                                                                                                                   | 1.744012 | 3.375505 | 3.938655 | 3.820559 |   |   |     |          |  |  |  |  |     |          |          |  |  |  |      |          |          |          |  |  |     |          |          |          |          |  |      |          |          |          |          |          |     |          |          |          |          |          |      |          |          |          |          |          |     |          |          |          |          |          |      |          |          |          |          |          |      |          |          |          |          |          |       |          |          |          |          |          |  |   |   |   |   |    |     |          |  |  |  |  |      |          |          |  |  |  |     |          |          |          |  |  |      |          |          |          |          |  |      |          |          |          |          |          |       |          |          |          |          |          |
| 9 B                                                                                                                 | 1.763472                                                                                                                                                                                                                                                                                                                                                                                                                                                                                                                                                                                                                                                                                                                                                                                                                                                                                                                                                                                                                                                                                                                                                                                                                                                                                                                                                                                                                                                                                                                                                                                                                                                                                                                                                                                                                                                                                                                                                                                                   | 2.951359 | 4.297747 | 3.996853 | 3.117115 |   |   |     |          |  |  |  |  |     |          |          |  |  |  |      |          |          |          |  |  |     |          |          |          |          |  |      |          |          |          |          |          |     |          |          |          |          |          |      |          |          |          |          |          |     |          |          |          |          |          |      |          |          |          |          |          |      |          |          |          |          |          |       |          |          |          |          |          |  |   |   |   |   |    |     |          |  |  |  |  |      |          |          |  |  |  |     |          |          |          |  |  |      |          |          |          |          |  |      |          |          |          |          |          |       |          |          |          |          |          |
| 10 B                                                                                                                | 3.009225                                                                                                                                                                                                                                                                                                                                                                                                                                                                                                                                                                                                                                                                                                                                                                                                                                                                                                                                                                                                                                                                                                                                                                                                                                                                                                                                                                                                                                                                                                                                                                                                                                                                                                                                                                                                                                                                                                                                                                                                   | 1.796954 | 2.121804 | 3.218687 | 3.919397 |   |   |     |          |  |  |  |  |     |          |          |  |  |  |      |          |          |          |  |  |     |          |          |          |          |  |      |          |          |          |          |          |     |          |          |          |          |          |      |          |          |          |          |          |     |          |          |          |          |          |      |          |          |          |          |          |      |          |          |          |          |          |       |          |          |          |          |          |  |   |   |   |   |    |     |          |  |  |  |  |      |          |          |  |  |  |     |          |          |          |  |  |      |          |          |          |          |  |      |          |          |          |          |          |       |          |          |          |          |          |
| 11 Re                                                                                                               | 2.921911                                                                                                                                                                                                                                                                                                                                                                                                                                                                                                                                                                                                                                                                                                                                                                                                                                                                                                                                                                                                                                                                                                                                                                                                                                                                                                                                                                                                                                                                                                                                                                                                                                                                                                                                                                                                                                                                                                                                                                                                   | 2.993627 | 2.951575 | 2.231772 | 2.164733 |   |   |     |          |  |  |  |  |     |          |          |  |  |  |      |          |          |          |  |  |     |          |          |          |          |  |      |          |          |          |          |          |     |          |          |          |          |          |      |          |          |          |          |          |     |          |          |          |          |          |      |          |          |          |          |          |      |          |          |          |          |          |       |          |          |          |          |          |  |   |   |   |   |    |     |          |  |  |  |  |      |          |          |  |  |  |     |          |          |          |  |  |      |          |          |          |          |  |      |          |          |          |          |          |       |          |          |          |          |          |
|                                                                                                                     | 6                                                                                                                                                                                                                                                                                                                                                                                                                                                                                                                                                                                                                                                                                                                                                                                                                                                                                                                                                                                                                                                                                                                                                                                                                                                                                                                                                                                                                                                                                                                                                                                                                                                                                                                                                                                                                                                                                                                                                                                                          | 7        | 8        | 9        | 10       |   |   |     |          |  |  |  |  |     |          |          |  |  |  |      |          |          |          |  |  |     |          |          |          |          |  |      |          |          |          |          |          |     |          |          |          |          |          |      |          |          |          |          |          |     |          |          |          |          |          |      |          |          |          |          |          |      |          |          |          |          |          |       |          |          |          |          |          |  |   |   |   |   |    |     |          |  |  |  |  |      |          |          |  |  |  |     |          |          |          |  |  |      |          |          |          |          |  |      |          |          |          |          |          |       |          |          |          |          |          |
| 6 B                                                                                                                 | 0.000000                                                                                                                                                                                                                                                                                                                                                                                                                                                                                                                                                                                                                                                                                                                                                                                                                                                                                                                                                                                                                                                                                                                                                                                                                                                                                                                                                                                                                                                                                                                                                                                                                                                                                                                                                                                                                                                                                                                                                                                                   |          |          |          |          |   |   |     |          |  |  |  |  |     |          |          |  |  |  |      |          |          |          |  |  |     |          |          |          |          |  |      |          |          |          |          |          |     |          |          |          |          |          |      |          |          |          |          |          |     |          |          |          |          |          |      |          |          |          |          |          |      |          |          |          |          |          |       |          |          |          |          |          |  |   |   |   |   |    |     |          |  |  |  |  |      |          |          |  |  |  |     |          |          |          |  |  |      |          |          |          |          |  |      |          |          |          |          |          |       |          |          |          |          |          |
| 7 Re                                                                                                                | 2.194036                                                                                                                                                                                                                                                                                                                                                                                                                                                                                                                                                                                                                                                                                                                                                                                                                                                                                                                                                                                                                                                                                                                                                                                                                                                                                                                                                                                                                                                                                                                                                                                                                                                                                                                                                                                                                                                                                                                                                                                                   | 0.000000 |          |          |          |   |   |     |          |  |  |  |  |     |          |          |  |  |  |      |          |          |          |  |  |     |          |          |          |          |  |      |          |          |          |          |          |     |          |          |          |          |          |      |          |          |          |          |          |     |          |          |          |          |          |      |          |          |          |          |          |      |          |          |          |          |          |       |          |          |          |          |          |  |   |   |   |   |    |     |          |  |  |  |  |      |          |          |  |  |  |     |          |          |          |  |  |      |          |          |          |          |  |      |          |          |          |          |          |       |          |          |          |          |          |
| 8 B                                                                                                                 | 2.801321                                                                                                                                                                                                                                                                                                                                                                                                                                                                                                                                                                                                                                                                                                                                                                                                                                                                                                                                                                                                                                                                                                                                                                                                                                                                                                                                                                                                                                                                                                                                                                                                                                                                                                                                                                                                                                                                                                                                                                                                   | 3.253207 | 0.000000 |          |          |   |   |     |          |  |  |  |  |     |          |          |  |  |  |      |          |          |          |  |  |     |          |          |          |          |  |      |          |          |          |          |          |     |          |          |          |          |          |      |          |          |          |          |          |     |          |          |          |          |          |      |          |          |          |          |          |      |          |          |          |          |          |       |          |          |          |          |          |  |   |   |   |   |    |     |          |  |  |  |  |      |          |          |  |  |  |     |          |          |          |  |  |      |          |          |          |          |  |      |          |          |          |          |          |       |          |          |          |          |          |
| 9 B                                                                                                                 | 1.712802                                                                                                                                                                                                                                                                                                                                                                                                                                                                                                                                                                                                                                                                                                                                                                                                                                                                                                                                                                                                                                                                                                                                                                                                                                                                                                                                                                                                                                                                                                                                                                                                                                                                                                                                                                                                                                                                                                                                                                                                   | 3.308800 | 1.707325 | 0.000000 |          |   |   |     |          |  |  |  |  |     |          |          |  |  |  |      |          |          |          |  |  |     |          |          |          |          |  |      |          |          |          |          |          |     |          |          |          |          |          |      |          |          |          |          |          |     |          |          |          |          |          |      |          |          |          |          |          |      |          |          |          |          |          |       |          |          |          |          |          |  |   |   |   |   |    |     |          |  |  |  |  |      |          |          |  |  |  |     |          |          |          |  |  |      |          |          |          |          |  |      |          |          |          |          |          |       |          |          |          |          |          |
| 10 B                                                                                                                | 3.669036                                                                                                                                                                                                                                                                                                                                                                                                                                                                                                                                                                                                                                                                                                                                                                                                                                                                                                                                                                                                                                                                                                                                                                                                                                                                                                                                                                                                                                                                                                                                                                                                                                                                                                                                                                                                                                                                                                                                                                                                   | 3.287751 | 1.733310 | 3.091451 | 0.000000 |   |   |     |          |  |  |  |  |     |          |          |  |  |  |      |          |          |          |  |  |     |          |          |          |          |  |      |          |          |          |          |          |     |          |          |          |          |          |      |          |          |          |          |          |     |          |          |          |          |          |      |          |          |          |          |          |      |          |          |          |          |          |       |          |          |          |          |          |  |   |   |   |   |    |     |          |  |  |  |  |      |          |          |  |  |  |     |          |          |          |  |  |      |          |          |          |          |  |      |          |          |          |          |          |       |          |          |          |          |          |
| 11 Re                                                                                                               | 2.298120                                                                                                                                                                                                                                                                                                                                                                                                                                                                                                                                                                                                                                                                                                                                                                                                                                                                                                                                                                                                                                                                                                                                                                                                                                                                                                                                                                                                                                                                                                                                                                                                                                                                                                                                                                                                                                                                                                                                                                                                   | 2.897396 | 2.360619 | 2.195579 | 2.263414 |   |   |     |          |  |  |  |  |     |          |          |  |  |  |      |          |          |          |  |  |     |          |          |          |          |  |      |          |          |          |          |          |     |          |          |          |          |          |      |          |          |          |          |          |     |          |          |          |          |          |      |          |          |          |          |          |      |          |          |          |          |          |       |          |          |          |          |          |  |   |   |   |   |    |     |          |  |  |  |  |      |          |          |  |  |  |     |          |          |          |  |  |      |          |          |          |          |  |      |          |          |          |          |          |       |          |          |          |          |          |

| 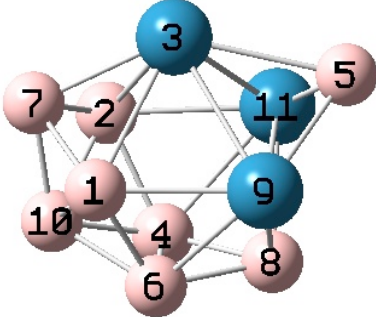 <p>7. -1019.3537842 +32.6 CS</p>   | <table border="1"> <thead> <tr> <th></th> <th>1</th> <th>2</th> <th>3</th> <th>4</th> <th>5</th> </tr> </thead> <tbody> <tr><td>1 B</td><td>0.000000</td><td></td><td></td><td></td><td></td></tr> <tr><td>2 B</td><td>2.669325</td><td>0.000000</td><td></td><td></td><td></td></tr> <tr><td>3 Re</td><td>2.349440</td><td>2.338087</td><td>0.000000</td><td></td><td></td></tr> <tr><td>4 B</td><td>2.826881</td><td>1.783632</td><td>3.335014</td><td>0.000000</td><td></td></tr> <tr><td>5 B</td><td>3.737384</td><td>3.721387</td><td>2.357412</td><td>3.796113</td><td>0.000000</td></tr> <tr><td>6 B</td><td>1.782482</td><td>2.826298</td><td>3.335961</td><td>1.802087</td><td>3.799758</td></tr> <tr><td>7 B</td><td>1.746865</td><td>1.745207</td><td>2.118707</td><td>2.925478</td><td>4.209654</td></tr> <tr><td>8 B</td><td>3.059743</td><td>3.056618</td><td>3.451448</td><td>1.756322</td><td>2.877008</td></tr> <tr><td>9 Re</td><td>2.280151</td><td>3.614475</td><td>2.516543</td><td>3.252738</td><td>2.096954</td></tr> <tr><td>10 B</td><td>1.797491</td><td>1.801477</td><td>3.132859</td><td>1.777120</td><td>4.501503</td></tr> <tr><td>11 Re</td><td>3.632735</td><td>2.282639</td><td>2.531512</td><td>2.288522</td><td>2.090789</td></tr> <tr> <th></th> <th>6</th> <th>7</th> <th>8</th> <th>9</th> <th>10</th> </tr> <tr><td>6 B</td><td>0.000000</td><td></td><td></td><td></td><td></td></tr> <tr><td>7 B</td><td>2.926356</td><td>0.000000</td><td></td><td></td><td></td></tr> <tr><td>8 B</td><td>1.754926</td><td>3.876164</td><td>0.000000</td><td></td><td></td></tr> <tr><td>9 Re</td><td>2.288827</td><td>3.547293</td><td>2.198591</td><td>0.000000</td><td></td></tr> <tr><td>10 B</td><td>1.778008</td><td>1.705411</td><td>2.989154</td><td>3.462230</td><td>0.000000</td></tr> <tr><td>11 Re</td><td>3.255369</td><td>3.560741</td><td>2.194340</td><td>2.969295</td><td>3.469400</td></tr> </tbody> </table> |          | 1        | 2        | 3        | 4 | 5 | 1 B | 0.000000 |  |  |  |  | 2 B | 2.669325 | 0.000000 |  |  |  | 3 Re | 2.349440 | 2.338087 | 0.000000 |  |  | 4 B | 2.826881 | 1.783632 | 3.335014 | 0.000000 |  | 5 B  | 3.737384 | 3.721387 | 2.357412 | 3.796113 | 0.000000 | 6 B | 1.782482 | 2.826298 | 3.335961 | 1.802087 | 3.799758 | 7 B  | 1.746865 | 1.745207 | 2.118707 | 2.925478 | 4.209654 | 8 B | 3.059743 | 3.056618 | 3.451448 | 1.756322 | 2.877008 | 9 Re | 2.280151 | 3.614475 | 2.516543 | 3.252738 | 2.096954 | 10 B | 1.797491 | 1.801477 | 3.132859 | 1.777120 | 4.501503 | 11 Re | 3.632735 | 2.282639 | 2.531512 | 2.288522 | 2.090789 |  | 6 | 7 | 8 | 9 | 10 | 6 B | 0.000000 |  |  |  |  | 7 B  | 2.926356 | 0.000000 |  |  |  | 8 B | 1.754926 | 3.876164 | 0.000000 |  |  | 9 Re | 2.288827 | 3.547293 | 2.198591 | 0.000000 |  | 10 B | 1.778008 | 1.705411 | 2.989154 | 3.462230 | 0.000000 | 11 Re | 3.255369 | 3.560741 | 2.194340 | 2.969295 | 3.469400 |
|----------------------------------------------------------------------------------------------------------------------|------------------------------------------------------------------------------------------------------------------------------------------------------------------------------------------------------------------------------------------------------------------------------------------------------------------------------------------------------------------------------------------------------------------------------------------------------------------------------------------------------------------------------------------------------------------------------------------------------------------------------------------------------------------------------------------------------------------------------------------------------------------------------------------------------------------------------------------------------------------------------------------------------------------------------------------------------------------------------------------------------------------------------------------------------------------------------------------------------------------------------------------------------------------------------------------------------------------------------------------------------------------------------------------------------------------------------------------------------------------------------------------------------------------------------------------------------------------------------------------------------------------------------------------------------------------------------------------------------------------------------------------------------------------------------------------------------------------------------------------------------------------------------------------------------------------------------------------------------------------------------------------------------------------------------------------------------------|----------|----------|----------|----------|---|---|-----|----------|--|--|--|--|-----|----------|----------|--|--|--|------|----------|----------|----------|--|--|-----|----------|----------|----------|----------|--|------|----------|----------|----------|----------|----------|-----|----------|----------|----------|----------|----------|------|----------|----------|----------|----------|----------|-----|----------|----------|----------|----------|----------|------|----------|----------|----------|----------|----------|------|----------|----------|----------|----------|----------|-------|----------|----------|----------|----------|----------|--|---|---|---|---|----|-----|----------|--|--|--|--|------|----------|----------|--|--|--|-----|----------|----------|----------|--|--|------|----------|----------|----------|----------|--|------|----------|----------|----------|----------|----------|-------|----------|----------|----------|----------|----------|
|                                                                                                                      | 1                                                                                                                                                                                                                                                                                                                                                                                                                                                                                                                                                                                                                                                                                                                                                                                                                                                                                                                                                                                                                                                                                                                                                                                                                                                                                                                                                                                                                                                                                                                                                                                                                                                                                                                                                                                                                                                                                                                                                          | 2        | 3        | 4        | 5        |   |   |     |          |  |  |  |  |     |          |          |  |  |  |      |          |          |          |  |  |     |          |          |          |          |  |      |          |          |          |          |          |     |          |          |          |          |          |      |          |          |          |          |          |     |          |          |          |          |          |      |          |          |          |          |          |      |          |          |          |          |          |       |          |          |          |          |          |  |   |   |   |   |    |     |          |  |  |  |  |      |          |          |  |  |  |     |          |          |          |  |  |      |          |          |          |          |  |      |          |          |          |          |          |       |          |          |          |          |          |
| 1 B                                                                                                                  | 0.000000                                                                                                                                                                                                                                                                                                                                                                                                                                                                                                                                                                                                                                                                                                                                                                                                                                                                                                                                                                                                                                                                                                                                                                                                                                                                                                                                                                                                                                                                                                                                                                                                                                                                                                                                                                                                                                                                                                                                                   |          |          |          |          |   |   |     |          |  |  |  |  |     |          |          |  |  |  |      |          |          |          |  |  |     |          |          |          |          |  |      |          |          |          |          |          |     |          |          |          |          |          |      |          |          |          |          |          |     |          |          |          |          |          |      |          |          |          |          |          |      |          |          |          |          |          |       |          |          |          |          |          |  |   |   |   |   |    |     |          |  |  |  |  |      |          |          |  |  |  |     |          |          |          |  |  |      |          |          |          |          |  |      |          |          |          |          |          |       |          |          |          |          |          |
| 2 B                                                                                                                  | 2.669325                                                                                                                                                                                                                                                                                                                                                                                                                                                                                                                                                                                                                                                                                                                                                                                                                                                                                                                                                                                                                                                                                                                                                                                                                                                                                                                                                                                                                                                                                                                                                                                                                                                                                                                                                                                                                                                                                                                                                   | 0.000000 |          |          |          |   |   |     |          |  |  |  |  |     |          |          |  |  |  |      |          |          |          |  |  |     |          |          |          |          |  |      |          |          |          |          |          |     |          |          |          |          |          |      |          |          |          |          |          |     |          |          |          |          |          |      |          |          |          |          |          |      |          |          |          |          |          |       |          |          |          |          |          |  |   |   |   |   |    |     |          |  |  |  |  |      |          |          |  |  |  |     |          |          |          |  |  |      |          |          |          |          |  |      |          |          |          |          |          |       |          |          |          |          |          |
| 3 Re                                                                                                                 | 2.349440                                                                                                                                                                                                                                                                                                                                                                                                                                                                                                                                                                                                                                                                                                                                                                                                                                                                                                                                                                                                                                                                                                                                                                                                                                                                                                                                                                                                                                                                                                                                                                                                                                                                                                                                                                                                                                                                                                                                                   | 2.338087 | 0.000000 |          |          |   |   |     |          |  |  |  |  |     |          |          |  |  |  |      |          |          |          |  |  |     |          |          |          |          |  |      |          |          |          |          |          |     |          |          |          |          |          |      |          |          |          |          |          |     |          |          |          |          |          |      |          |          |          |          |          |      |          |          |          |          |          |       |          |          |          |          |          |  |   |   |   |   |    |     |          |  |  |  |  |      |          |          |  |  |  |     |          |          |          |  |  |      |          |          |          |          |  |      |          |          |          |          |          |       |          |          |          |          |          |
| 4 B                                                                                                                  | 2.826881                                                                                                                                                                                                                                                                                                                                                                                                                                                                                                                                                                                                                                                                                                                                                                                                                                                                                                                                                                                                                                                                                                                                                                                                                                                                                                                                                                                                                                                                                                                                                                                                                                                                                                                                                                                                                                                                                                                                                   | 1.783632 | 3.335014 | 0.000000 |          |   |   |     |          |  |  |  |  |     |          |          |  |  |  |      |          |          |          |  |  |     |          |          |          |          |  |      |          |          |          |          |          |     |          |          |          |          |          |      |          |          |          |          |          |     |          |          |          |          |          |      |          |          |          |          |          |      |          |          |          |          |          |       |          |          |          |          |          |  |   |   |   |   |    |     |          |  |  |  |  |      |          |          |  |  |  |     |          |          |          |  |  |      |          |          |          |          |  |      |          |          |          |          |          |       |          |          |          |          |          |
| 5 B                                                                                                                  | 3.737384                                                                                                                                                                                                                                                                                                                                                                                                                                                                                                                                                                                                                                                                                                                                                                                                                                                                                                                                                                                                                                                                                                                                                                                                                                                                                                                                                                                                                                                                                                                                                                                                                                                                                                                                                                                                                                                                                                                                                   | 3.721387 | 2.357412 | 3.796113 | 0.000000 |   |   |     |          |  |  |  |  |     |          |          |  |  |  |      |          |          |          |  |  |     |          |          |          |          |  |      |          |          |          |          |          |     |          |          |          |          |          |      |          |          |          |          |          |     |          |          |          |          |          |      |          |          |          |          |          |      |          |          |          |          |          |       |          |          |          |          |          |  |   |   |   |   |    |     |          |  |  |  |  |      |          |          |  |  |  |     |          |          |          |  |  |      |          |          |          |          |  |      |          |          |          |          |          |       |          |          |          |          |          |
| 6 B                                                                                                                  | 1.782482                                                                                                                                                                                                                                                                                                                                                                                                                                                                                                                                                                                                                                                                                                                                                                                                                                                                                                                                                                                                                                                                                                                                                                                                                                                                                                                                                                                                                                                                                                                                                                                                                                                                                                                                                                                                                                                                                                                                                   | 2.826298 | 3.335961 | 1.802087 | 3.799758 |   |   |     |          |  |  |  |  |     |          |          |  |  |  |      |          |          |          |  |  |     |          |          |          |          |  |      |          |          |          |          |          |     |          |          |          |          |          |      |          |          |          |          |          |     |          |          |          |          |          |      |          |          |          |          |          |      |          |          |          |          |          |       |          |          |          |          |          |  |   |   |   |   |    |     |          |  |  |  |  |      |          |          |  |  |  |     |          |          |          |  |  |      |          |          |          |          |  |      |          |          |          |          |          |       |          |          |          |          |          |
| 7 B                                                                                                                  | 1.746865                                                                                                                                                                                                                                                                                                                                                                                                                                                                                                                                                                                                                                                                                                                                                                                                                                                                                                                                                                                                                                                                                                                                                                                                                                                                                                                                                                                                                                                                                                                                                                                                                                                                                                                                                                                                                                                                                                                                                   | 1.745207 | 2.118707 | 2.925478 | 4.209654 |   |   |     |          |  |  |  |  |     |          |          |  |  |  |      |          |          |          |  |  |     |          |          |          |          |  |      |          |          |          |          |          |     |          |          |          |          |          |      |          |          |          |          |          |     |          |          |          |          |          |      |          |          |          |          |          |      |          |          |          |          |          |       |          |          |          |          |          |  |   |   |   |   |    |     |          |  |  |  |  |      |          |          |  |  |  |     |          |          |          |  |  |      |          |          |          |          |  |      |          |          |          |          |          |       |          |          |          |          |          |
| 8 B                                                                                                                  | 3.059743                                                                                                                                                                                                                                                                                                                                                                                                                                                                                                                                                                                                                                                                                                                                                                                                                                                                                                                                                                                                                                                                                                                                                                                                                                                                                                                                                                                                                                                                                                                                                                                                                                                                                                                                                                                                                                                                                                                                                   | 3.056618 | 3.451448 | 1.756322 | 2.877008 |   |   |     |          |  |  |  |  |     |          |          |  |  |  |      |          |          |          |  |  |     |          |          |          |          |  |      |          |          |          |          |          |     |          |          |          |          |          |      |          |          |          |          |          |     |          |          |          |          |          |      |          |          |          |          |          |      |          |          |          |          |          |       |          |          |          |          |          |  |   |   |   |   |    |     |          |  |  |  |  |      |          |          |  |  |  |     |          |          |          |  |  |      |          |          |          |          |  |      |          |          |          |          |          |       |          |          |          |          |          |
| 9 Re                                                                                                                 | 2.280151                                                                                                                                                                                                                                                                                                                                                                                                                                                                                                                                                                                                                                                                                                                                                                                                                                                                                                                                                                                                                                                                                                                                                                                                                                                                                                                                                                                                                                                                                                                                                                                                                                                                                                                                                                                                                                                                                                                                                   | 3.614475 | 2.516543 | 3.252738 | 2.096954 |   |   |     |          |  |  |  |  |     |          |          |  |  |  |      |          |          |          |  |  |     |          |          |          |          |  |      |          |          |          |          |          |     |          |          |          |          |          |      |          |          |          |          |          |     |          |          |          |          |          |      |          |          |          |          |          |      |          |          |          |          |          |       |          |          |          |          |          |  |   |   |   |   |    |     |          |  |  |  |  |      |          |          |  |  |  |     |          |          |          |  |  |      |          |          |          |          |  |      |          |          |          |          |          |       |          |          |          |          |          |
| 10 B                                                                                                                 | 1.797491                                                                                                                                                                                                                                                                                                                                                                                                                                                                                                                                                                                                                                                                                                                                                                                                                                                                                                                                                                                                                                                                                                                                                                                                                                                                                                                                                                                                                                                                                                                                                                                                                                                                                                                                                                                                                                                                                                                                                   | 1.801477 | 3.132859 | 1.777120 | 4.501503 |   |   |     |          |  |  |  |  |     |          |          |  |  |  |      |          |          |          |  |  |     |          |          |          |          |  |      |          |          |          |          |          |     |          |          |          |          |          |      |          |          |          |          |          |     |          |          |          |          |          |      |          |          |          |          |          |      |          |          |          |          |          |       |          |          |          |          |          |  |   |   |   |   |    |     |          |  |  |  |  |      |          |          |  |  |  |     |          |          |          |  |  |      |          |          |          |          |  |      |          |          |          |          |          |       |          |          |          |          |          |
| 11 Re                                                                                                                | 3.632735                                                                                                                                                                                                                                                                                                                                                                                                                                                                                                                                                                                                                                                                                                                                                                                                                                                                                                                                                                                                                                                                                                                                                                                                                                                                                                                                                                                                                                                                                                                                                                                                                                                                                                                                                                                                                                                                                                                                                   | 2.282639 | 2.531512 | 2.288522 | 2.090789 |   |   |     |          |  |  |  |  |     |          |          |  |  |  |      |          |          |          |  |  |     |          |          |          |          |  |      |          |          |          |          |          |     |          |          |          |          |          |      |          |          |          |          |          |     |          |          |          |          |          |      |          |          |          |          |          |      |          |          |          |          |          |       |          |          |          |          |          |  |   |   |   |   |    |     |          |  |  |  |  |      |          |          |  |  |  |     |          |          |          |  |  |      |          |          |          |          |  |      |          |          |          |          |          |       |          |          |          |          |          |
|                                                                                                                      | 6                                                                                                                                                                                                                                                                                                                                                                                                                                                                                                                                                                                                                                                                                                                                                                                                                                                                                                                                                                                                                                                                                                                                                                                                                                                                                                                                                                                                                                                                                                                                                                                                                                                                                                                                                                                                                                                                                                                                                          | 7        | 8        | 9        | 10       |   |   |     |          |  |  |  |  |     |          |          |  |  |  |      |          |          |          |  |  |     |          |          |          |          |  |      |          |          |          |          |          |     |          |          |          |          |          |      |          |          |          |          |          |     |          |          |          |          |          |      |          |          |          |          |          |      |          |          |          |          |          |       |          |          |          |          |          |  |   |   |   |   |    |     |          |  |  |  |  |      |          |          |  |  |  |     |          |          |          |  |  |      |          |          |          |          |  |      |          |          |          |          |          |       |          |          |          |          |          |
| 6 B                                                                                                                  | 0.000000                                                                                                                                                                                                                                                                                                                                                                                                                                                                                                                                                                                                                                                                                                                                                                                                                                                                                                                                                                                                                                                                                                                                                                                                                                                                                                                                                                                                                                                                                                                                                                                                                                                                                                                                                                                                                                                                                                                                                   |          |          |          |          |   |   |     |          |  |  |  |  |     |          |          |  |  |  |      |          |          |          |  |  |     |          |          |          |          |  |      |          |          |          |          |          |     |          |          |          |          |          |      |          |          |          |          |          |     |          |          |          |          |          |      |          |          |          |          |          |      |          |          |          |          |          |       |          |          |          |          |          |  |   |   |   |   |    |     |          |  |  |  |  |      |          |          |  |  |  |     |          |          |          |  |  |      |          |          |          |          |  |      |          |          |          |          |          |       |          |          |          |          |          |
| 7 B                                                                                                                  | 2.926356                                                                                                                                                                                                                                                                                                                                                                                                                                                                                                                                                                                                                                                                                                                                                                                                                                                                                                                                                                                                                                                                                                                                                                                                                                                                                                                                                                                                                                                                                                                                                                                                                                                                                                                                                                                                                                                                                                                                                   | 0.000000 |          |          |          |   |   |     |          |  |  |  |  |     |          |          |  |  |  |      |          |          |          |  |  |     |          |          |          |          |  |      |          |          |          |          |          |     |          |          |          |          |          |      |          |          |          |          |          |     |          |          |          |          |          |      |          |          |          |          |          |      |          |          |          |          |          |       |          |          |          |          |          |  |   |   |   |   |    |     |          |  |  |  |  |      |          |          |  |  |  |     |          |          |          |  |  |      |          |          |          |          |  |      |          |          |          |          |          |       |          |          |          |          |          |
| 8 B                                                                                                                  | 1.754926                                                                                                                                                                                                                                                                                                                                                                                                                                                                                                                                                                                                                                                                                                                                                                                                                                                                                                                                                                                                                                                                                                                                                                                                                                                                                                                                                                                                                                                                                                                                                                                                                                                                                                                                                                                                                                                                                                                                                   | 3.876164 | 0.000000 |          |          |   |   |     |          |  |  |  |  |     |          |          |  |  |  |      |          |          |          |  |  |     |          |          |          |          |  |      |          |          |          |          |          |     |          |          |          |          |          |      |          |          |          |          |          |     |          |          |          |          |          |      |          |          |          |          |          |      |          |          |          |          |          |       |          |          |          |          |          |  |   |   |   |   |    |     |          |  |  |  |  |      |          |          |  |  |  |     |          |          |          |  |  |      |          |          |          |          |  |      |          |          |          |          |          |       |          |          |          |          |          |
| 9 Re                                                                                                                 | 2.288827                                                                                                                                                                                                                                                                                                                                                                                                                                                                                                                                                                                                                                                                                                                                                                                                                                                                                                                                                                                                                                                                                                                                                                                                                                                                                                                                                                                                                                                                                                                                                                                                                                                                                                                                                                                                                                                                                                                                                   | 3.547293 | 2.198591 | 0.000000 |          |   |   |     |          |  |  |  |  |     |          |          |  |  |  |      |          |          |          |  |  |     |          |          |          |          |  |      |          |          |          |          |          |     |          |          |          |          |          |      |          |          |          |          |          |     |          |          |          |          |          |      |          |          |          |          |          |      |          |          |          |          |          |       |          |          |          |          |          |  |   |   |   |   |    |     |          |  |  |  |  |      |          |          |  |  |  |     |          |          |          |  |  |      |          |          |          |          |  |      |          |          |          |          |          |       |          |          |          |          |          |
| 10 B                                                                                                                 | 1.778008                                                                                                                                                                                                                                                                                                                                                                                                                                                                                                                                                                                                                                                                                                                                                                                                                                                                                                                                                                                                                                                                                                                                                                                                                                                                                                                                                                                                                                                                                                                                                                                                                                                                                                                                                                                                                                                                                                                                                   | 1.705411 | 2.989154 | 3.462230 | 0.000000 |   |   |     |          |  |  |  |  |     |          |          |  |  |  |      |          |          |          |  |  |     |          |          |          |          |  |      |          |          |          |          |          |     |          |          |          |          |          |      |          |          |          |          |          |     |          |          |          |          |          |      |          |          |          |          |          |      |          |          |          |          |          |       |          |          |          |          |          |  |   |   |   |   |    |     |          |  |  |  |  |      |          |          |  |  |  |     |          |          |          |  |  |      |          |          |          |          |  |      |          |          |          |          |          |       |          |          |          |          |          |
| 11 Re                                                                                                                | 3.255369                                                                                                                                                                                                                                                                                                                                                                                                                                                                                                                                                                                                                                                                                                                                                                                                                                                                                                                                                                                                                                                                                                                                                                                                                                                                                                                                                                                                                                                                                                                                                                                                                                                                                                                                                                                                                                                                                                                                                   | 3.560741 | 2.194340 | 2.969295 | 3.469400 |   |   |     |          |  |  |  |  |     |          |          |  |  |  |      |          |          |          |  |  |     |          |          |          |          |  |      |          |          |          |          |          |     |          |          |          |          |          |      |          |          |          |          |          |     |          |          |          |          |          |      |          |          |          |          |          |      |          |          |          |          |          |       |          |          |          |          |          |  |   |   |   |   |    |     |          |  |  |  |  |      |          |          |  |  |  |     |          |          |          |  |  |      |          |          |          |          |  |      |          |          |          |          |          |       |          |          |          |          |          |
|  <p>8. -1019.3525229 +33.4 C2v</p> | <table border="1"> <thead> <tr> <th></th> <th>1</th> <th>2</th> <th>3</th> <th>4</th> <th>5</th> </tr> </thead> <tbody> <tr><td>1 B</td><td>0.000000</td><td></td><td></td><td></td><td></td></tr> <tr><td>2 B</td><td>1.699922</td><td>0.000000</td><td></td><td></td><td></td></tr> <tr><td>3 B</td><td>4.525295</td><td>4.492075</td><td>0.000000</td><td></td><td></td></tr> <tr><td>4 B</td><td>3.912489</td><td>4.522736</td><td>1.700974</td><td>0.000000</td><td></td></tr> <tr><td>5 Re</td><td>2.334141</td><td>3.300046</td><td>3.299079</td><td>2.329050</td><td>0.000000</td></tr> <tr><td>6 B</td><td>1.812237</td><td>1.683433</td><td>4.012229</td><td>3.851414</td><td>3.324460</td></tr> <tr><td>7 Re</td><td>2.334009</td><td>3.302419</td><td>3.302194</td><td>2.332440</td><td>2.392466</td></tr> <tr><td>8 B</td><td>1.813672</td><td>1.684972</td><td>4.012465</td><td>3.849904</td><td>2.115660</td></tr> <tr><td>9 B</td><td>3.852652</td><td>4.009004</td><td>1.684777</td><td>1.820248</td><td>3.327113</td></tr> <tr><td>10 B</td><td>3.853023</td><td>4.008406</td><td>1.684786</td><td>1.818344</td><td>2.118338</td></tr> <tr><td>11 Re</td><td>2.958502</td><td>2.312259</td><td>2.308297</td><td>2.954250</td><td>2.899571</td></tr> <tr> <th></th> <th>6</th> <th>7</th> <th>8</th> <th>9</th> <th>10</th> </tr> <tr><td>6 B</td><td>0.000000</td><td></td><td></td><td></td><td></td></tr> <tr><td>7 Re</td><td>2.118965</td><td>0.000000</td><td></td><td></td><td></td></tr> <tr><td>8 B</td><td>2.748935</td><td>3.326776</td><td>0.000000</td><td></td><td></td></tr> <tr><td>9 B</td><td>2.949388</td><td>2.121106</td><td>4.033234</td><td>0.000000</td><td></td></tr> <tr><td>10 B</td><td>4.032388</td><td>3.329989</td><td>2.948490</td><td>2.752822</td><td>0.000000</td></tr> <tr><td>11 Re</td><td>2.316112</td><td>2.903585</td><td>2.316906</td><td>2.309726</td><td>2.308744</td></tr> </tbody> </table> |          | 1        | 2        | 3        | 4 | 5 | 1 B | 0.000000 |  |  |  |  | 2 B | 1.699922 | 0.000000 |  |  |  | 3 B  | 4.525295 | 4.492075 | 0.000000 |  |  | 4 B | 3.912489 | 4.522736 | 1.700974 | 0.000000 |  | 5 Re | 2.334141 | 3.300046 | 3.299079 | 2.329050 | 0.000000 | 6 B | 1.812237 | 1.683433 | 4.012229 | 3.851414 | 3.324460 | 7 Re | 2.334009 | 3.302419 | 3.302194 | 2.332440 | 2.392466 | 8 B | 1.813672 | 1.684972 | 4.012465 | 3.849904 | 2.115660 | 9 B  | 3.852652 | 4.009004 | 1.684777 | 1.820248 | 3.327113 | 10 B | 3.853023 | 4.008406 | 1.684786 | 1.818344 | 2.118338 | 11 Re | 2.958502 | 2.312259 | 2.308297 | 2.954250 | 2.899571 |  | 6 | 7 | 8 | 9 | 10 | 6 B | 0.000000 |  |  |  |  | 7 Re | 2.118965 | 0.000000 |  |  |  | 8 B | 2.748935 | 3.326776 | 0.000000 |  |  | 9 B  | 2.949388 | 2.121106 | 4.033234 | 0.000000 |  | 10 B | 4.032388 | 3.329989 | 2.948490 | 2.752822 | 0.000000 | 11 Re | 2.316112 | 2.903585 | 2.316906 | 2.309726 | 2.308744 |
|                                                                                                                      | 1                                                                                                                                                                                                                                                                                                                                                                                                                                                                                                                                                                                                                                                                                                                                                                                                                                                                                                                                                                                                                                                                                                                                                                                                                                                                                                                                                                                                                                                                                                                                                                                                                                                                                                                                                                                                                                                                                                                                                          | 2        | 3        | 4        | 5        |   |   |     |          |  |  |  |  |     |          |          |  |  |  |      |          |          |          |  |  |     |          |          |          |          |  |      |          |          |          |          |          |     |          |          |          |          |          |      |          |          |          |          |          |     |          |          |          |          |          |      |          |          |          |          |          |      |          |          |          |          |          |       |          |          |          |          |          |  |   |   |   |   |    |     |          |  |  |  |  |      |          |          |  |  |  |     |          |          |          |  |  |      |          |          |          |          |  |      |          |          |          |          |          |       |          |          |          |          |          |
| 1 B                                                                                                                  | 0.000000                                                                                                                                                                                                                                                                                                                                                                                                                                                                                                                                                                                                                                                                                                                                                                                                                                                                                                                                                                                                                                                                                                                                                                                                                                                                                                                                                                                                                                                                                                                                                                                                                                                                                                                                                                                                                                                                                                                                                   |          |          |          |          |   |   |     |          |  |  |  |  |     |          |          |  |  |  |      |          |          |          |  |  |     |          |          |          |          |  |      |          |          |          |          |          |     |          |          |          |          |          |      |          |          |          |          |          |     |          |          |          |          |          |      |          |          |          |          |          |      |          |          |          |          |          |       |          |          |          |          |          |  |   |   |   |   |    |     |          |  |  |  |  |      |          |          |  |  |  |     |          |          |          |  |  |      |          |          |          |          |  |      |          |          |          |          |          |       |          |          |          |          |          |
| 2 B                                                                                                                  | 1.699922                                                                                                                                                                                                                                                                                                                                                                                                                                                                                                                                                                                                                                                                                                                                                                                                                                                                                                                                                                                                                                                                                                                                                                                                                                                                                                                                                                                                                                                                                                                                                                                                                                                                                                                                                                                                                                                                                                                                                   | 0.000000 |          |          |          |   |   |     |          |  |  |  |  |     |          |          |  |  |  |      |          |          |          |  |  |     |          |          |          |          |  |      |          |          |          |          |          |     |          |          |          |          |          |      |          |          |          |          |          |     |          |          |          |          |          |      |          |          |          |          |          |      |          |          |          |          |          |       |          |          |          |          |          |  |   |   |   |   |    |     |          |  |  |  |  |      |          |          |  |  |  |     |          |          |          |  |  |      |          |          |          |          |  |      |          |          |          |          |          |       |          |          |          |          |          |
| 3 B                                                                                                                  | 4.525295                                                                                                                                                                                                                                                                                                                                                                                                                                                                                                                                                                                                                                                                                                                                                                                                                                                                                                                                                                                                                                                                                                                                                                                                                                                                                                                                                                                                                                                                                                                                                                                                                                                                                                                                                                                                                                                                                                                                                   | 4.492075 | 0.000000 |          |          |   |   |     |          |  |  |  |  |     |          |          |  |  |  |      |          |          |          |  |  |     |          |          |          |          |  |      |          |          |          |          |          |     |          |          |          |          |          |      |          |          |          |          |          |     |          |          |          |          |          |      |          |          |          |          |          |      |          |          |          |          |          |       |          |          |          |          |          |  |   |   |   |   |    |     |          |  |  |  |  |      |          |          |  |  |  |     |          |          |          |  |  |      |          |          |          |          |  |      |          |          |          |          |          |       |          |          |          |          |          |
| 4 B                                                                                                                  | 3.912489                                                                                                                                                                                                                                                                                                                                                                                                                                                                                                                                                                                                                                                                                                                                                                                                                                                                                                                                                                                                                                                                                                                                                                                                                                                                                                                                                                                                                                                                                                                                                                                                                                                                                                                                                                                                                                                                                                                                                   | 4.522736 | 1.700974 | 0.000000 |          |   |   |     |          |  |  |  |  |     |          |          |  |  |  |      |          |          |          |  |  |     |          |          |          |          |  |      |          |          |          |          |          |     |          |          |          |          |          |      |          |          |          |          |          |     |          |          |          |          |          |      |          |          |          |          |          |      |          |          |          |          |          |       |          |          |          |          |          |  |   |   |   |   |    |     |          |  |  |  |  |      |          |          |  |  |  |     |          |          |          |  |  |      |          |          |          |          |  |      |          |          |          |          |          |       |          |          |          |          |          |
| 5 Re                                                                                                                 | 2.334141                                                                                                                                                                                                                                                                                                                                                                                                                                                                                                                                                                                                                                                                                                                                                                                                                                                                                                                                                                                                                                                                                                                                                                                                                                                                                                                                                                                                                                                                                                                                                                                                                                                                                                                                                                                                                                                                                                                                                   | 3.300046 | 3.299079 | 2.329050 | 0.000000 |   |   |     |          |  |  |  |  |     |          |          |  |  |  |      |          |          |          |  |  |     |          |          |          |          |  |      |          |          |          |          |          |     |          |          |          |          |          |      |          |          |          |          |          |     |          |          |          |          |          |      |          |          |          |          |          |      |          |          |          |          |          |       |          |          |          |          |          |  |   |   |   |   |    |     |          |  |  |  |  |      |          |          |  |  |  |     |          |          |          |  |  |      |          |          |          |          |  |      |          |          |          |          |          |       |          |          |          |          |          |
| 6 B                                                                                                                  | 1.812237                                                                                                                                                                                                                                                                                                                                                                                                                                                                                                                                                                                                                                                                                                                                                                                                                                                                                                                                                                                                                                                                                                                                                                                                                                                                                                                                                                                                                                                                                                                                                                                                                                                                                                                                                                                                                                                                                                                                                   | 1.683433 | 4.012229 | 3.851414 | 3.324460 |   |   |     |          |  |  |  |  |     |          |          |  |  |  |      |          |          |          |  |  |     |          |          |          |          |  |      |          |          |          |          |          |     |          |          |          |          |          |      |          |          |          |          |          |     |          |          |          |          |          |      |          |          |          |          |          |      |          |          |          |          |          |       |          |          |          |          |          |  |   |   |   |   |    |     |          |  |  |  |  |      |          |          |  |  |  |     |          |          |          |  |  |      |          |          |          |          |  |      |          |          |          |          |          |       |          |          |          |          |          |
| 7 Re                                                                                                                 | 2.334009                                                                                                                                                                                                                                                                                                                                                                                                                                                                                                                                                                                                                                                                                                                                                                                                                                                                                                                                                                                                                                                                                                                                                                                                                                                                                                                                                                                                                                                                                                                                                                                                                                                                                                                                                                                                                                                                                                                                                   | 3.302419 | 3.302194 | 2.332440 | 2.392466 |   |   |     |          |  |  |  |  |     |          |          |  |  |  |      |          |          |          |  |  |     |          |          |          |          |  |      |          |          |          |          |          |     |          |          |          |          |          |      |          |          |          |          |          |     |          |          |          |          |          |      |          |          |          |          |          |      |          |          |          |          |          |       |          |          |          |          |          |  |   |   |   |   |    |     |          |  |  |  |  |      |          |          |  |  |  |     |          |          |          |  |  |      |          |          |          |          |  |      |          |          |          |          |          |       |          |          |          |          |          |
| 8 B                                                                                                                  | 1.813672                                                                                                                                                                                                                                                                                                                                                                                                                                                                                                                                                                                                                                                                                                                                                                                                                                                                                                                                                                                                                                                                                                                                                                                                                                                                                                                                                                                                                                                                                                                                                                                                                                                                                                                                                                                                                                                                                                                                                   | 1.684972 | 4.012465 | 3.849904 | 2.115660 |   |   |     |          |  |  |  |  |     |          |          |  |  |  |      |          |          |          |  |  |     |          |          |          |          |  |      |          |          |          |          |          |     |          |          |          |          |          |      |          |          |          |          |          |     |          |          |          |          |          |      |          |          |          |          |          |      |          |          |          |          |          |       |          |          |          |          |          |  |   |   |   |   |    |     |          |  |  |  |  |      |          |          |  |  |  |     |          |          |          |  |  |      |          |          |          |          |  |      |          |          |          |          |          |       |          |          |          |          |          |
| 9 B                                                                                                                  | 3.852652                                                                                                                                                                                                                                                                                                                                                                                                                                                                                                                                                                                                                                                                                                                                                                                                                                                                                                                                                                                                                                                                                                                                                                                                                                                                                                                                                                                                                                                                                                                                                                                                                                                                                                                                                                                                                                                                                                                                                   | 4.009004 | 1.684777 | 1.820248 | 3.327113 |   |   |     |          |  |  |  |  |     |          |          |  |  |  |      |          |          |          |  |  |     |          |          |          |          |  |      |          |          |          |          |          |     |          |          |          |          |          |      |          |          |          |          |          |     |          |          |          |          |          |      |          |          |          |          |          |      |          |          |          |          |          |       |          |          |          |          |          |  |   |   |   |   |    |     |          |  |  |  |  |      |          |          |  |  |  |     |          |          |          |  |  |      |          |          |          |          |  |      |          |          |          |          |          |       |          |          |          |          |          |
| 10 B                                                                                                                 | 3.853023                                                                                                                                                                                                                                                                                                                                                                                                                                                                                                                                                                                                                                                                                                                                                                                                                                                                                                                                                                                                                                                                                                                                                                                                                                                                                                                                                                                                                                                                                                                                                                                                                                                                                                                                                                                                                                                                                                                                                   | 4.008406 | 1.684786 | 1.818344 | 2.118338 |   |   |     |          |  |  |  |  |     |          |          |  |  |  |      |          |          |          |  |  |     |          |          |          |          |  |      |          |          |          |          |          |     |          |          |          |          |          |      |          |          |          |          |          |     |          |          |          |          |          |      |          |          |          |          |          |      |          |          |          |          |          |       |          |          |          |          |          |  |   |   |   |   |    |     |          |  |  |  |  |      |          |          |  |  |  |     |          |          |          |  |  |      |          |          |          |          |  |      |          |          |          |          |          |       |          |          |          |          |          |
| 11 Re                                                                                                                | 2.958502                                                                                                                                                                                                                                                                                                                                                                                                                                                                                                                                                                                                                                                                                                                                                                                                                                                                                                                                                                                                                                                                                                                                                                                                                                                                                                                                                                                                                                                                                                                                                                                                                                                                                                                                                                                                                                                                                                                                                   | 2.312259 | 2.308297 | 2.954250 | 2.899571 |   |   |     |          |  |  |  |  |     |          |          |  |  |  |      |          |          |          |  |  |     |          |          |          |          |  |      |          |          |          |          |          |     |          |          |          |          |          |      |          |          |          |          |          |     |          |          |          |          |          |      |          |          |          |          |          |      |          |          |          |          |          |       |          |          |          |          |          |  |   |   |   |   |    |     |          |  |  |  |  |      |          |          |  |  |  |     |          |          |          |  |  |      |          |          |          |          |  |      |          |          |          |          |          |       |          |          |          |          |          |
|                                                                                                                      | 6                                                                                                                                                                                                                                                                                                                                                                                                                                                                                                                                                                                                                                                                                                                                                                                                                                                                                                                                                                                                                                                                                                                                                                                                                                                                                                                                                                                                                                                                                                                                                                                                                                                                                                                                                                                                                                                                                                                                                          | 7        | 8        | 9        | 10       |   |   |     |          |  |  |  |  |     |          |          |  |  |  |      |          |          |          |  |  |     |          |          |          |          |  |      |          |          |          |          |          |     |          |          |          |          |          |      |          |          |          |          |          |     |          |          |          |          |          |      |          |          |          |          |          |      |          |          |          |          |          |       |          |          |          |          |          |  |   |   |   |   |    |     |          |  |  |  |  |      |          |          |  |  |  |     |          |          |          |  |  |      |          |          |          |          |  |      |          |          |          |          |          |       |          |          |          |          |          |
| 6 B                                                                                                                  | 0.000000                                                                                                                                                                                                                                                                                                                                                                                                                                                                                                                                                                                                                                                                                                                                                                                                                                                                                                                                                                                                                                                                                                                                                                                                                                                                                                                                                                                                                                                                                                                                                                                                                                                                                                                                                                                                                                                                                                                                                   |          |          |          |          |   |   |     |          |  |  |  |  |     |          |          |  |  |  |      |          |          |          |  |  |     |          |          |          |          |  |      |          |          |          |          |          |     |          |          |          |          |          |      |          |          |          |          |          |     |          |          |          |          |          |      |          |          |          |          |          |      |          |          |          |          |          |       |          |          |          |          |          |  |   |   |   |   |    |     |          |  |  |  |  |      |          |          |  |  |  |     |          |          |          |  |  |      |          |          |          |          |  |      |          |          |          |          |          |       |          |          |          |          |          |
| 7 Re                                                                                                                 | 2.118965                                                                                                                                                                                                                                                                                                                                                                                                                                                                                                                                                                                                                                                                                                                                                                                                                                                                                                                                                                                                                                                                                                                                                                                                                                                                                                                                                                                                                                                                                                                                                                                                                                                                                                                                                                                                                                                                                                                                                   | 0.000000 |          |          |          |   |   |     |          |  |  |  |  |     |          |          |  |  |  |      |          |          |          |  |  |     |          |          |          |          |  |      |          |          |          |          |          |     |          |          |          |          |          |      |          |          |          |          |          |     |          |          |          |          |          |      |          |          |          |          |          |      |          |          |          |          |          |       |          |          |          |          |          |  |   |   |   |   |    |     |          |  |  |  |  |      |          |          |  |  |  |     |          |          |          |  |  |      |          |          |          |          |  |      |          |          |          |          |          |       |          |          |          |          |          |
| 8 B                                                                                                                  | 2.748935                                                                                                                                                                                                                                                                                                                                                                                                                                                                                                                                                                                                                                                                                                                                                                                                                                                                                                                                                                                                                                                                                                                                                                                                                                                                                                                                                                                                                                                                                                                                                                                                                                                                                                                                                                                                                                                                                                                                                   | 3.326776 | 0.000000 |          |          |   |   |     |          |  |  |  |  |     |          |          |  |  |  |      |          |          |          |  |  |     |          |          |          |          |  |      |          |          |          |          |          |     |          |          |          |          |          |      |          |          |          |          |          |     |          |          |          |          |          |      |          |          |          |          |          |      |          |          |          |          |          |       |          |          |          |          |          |  |   |   |   |   |    |     |          |  |  |  |  |      |          |          |  |  |  |     |          |          |          |  |  |      |          |          |          |          |  |      |          |          |          |          |          |       |          |          |          |          |          |
| 9 B                                                                                                                  | 2.949388                                                                                                                                                                                                                                                                                                                                                                                                                                                                                                                                                                                                                                                                                                                                                                                                                                                                                                                                                                                                                                                                                                                                                                                                                                                                                                                                                                                                                                                                                                                                                                                                                                                                                                                                                                                                                                                                                                                                                   | 2.121106 | 4.033234 | 0.000000 |          |   |   |     |          |  |  |  |  |     |          |          |  |  |  |      |          |          |          |  |  |     |          |          |          |          |  |      |          |          |          |          |          |     |          |          |          |          |          |      |          |          |          |          |          |     |          |          |          |          |          |      |          |          |          |          |          |      |          |          |          |          |          |       |          |          |          |          |          |  |   |   |   |   |    |     |          |  |  |  |  |      |          |          |  |  |  |     |          |          |          |  |  |      |          |          |          |          |  |      |          |          |          |          |          |       |          |          |          |          |          |
| 10 B                                                                                                                 | 4.032388                                                                                                                                                                                                                                                                                                                                                                                                                                                                                                                                                                                                                                                                                                                                                                                                                                                                                                                                                                                                                                                                                                                                                                                                                                                                                                                                                                                                                                                                                                                                                                                                                                                                                                                                                                                                                                                                                                                                                   | 3.329989 | 2.948490 | 2.752822 | 0.000000 |   |   |     |          |  |  |  |  |     |          |          |  |  |  |      |          |          |          |  |  |     |          |          |          |          |  |      |          |          |          |          |          |     |          |          |          |          |          |      |          |          |          |          |          |     |          |          |          |          |          |      |          |          |          |          |          |      |          |          |          |          |          |       |          |          |          |          |          |  |   |   |   |   |    |     |          |  |  |  |  |      |          |          |  |  |  |     |          |          |          |  |  |      |          |          |          |          |  |      |          |          |          |          |          |       |          |          |          |          |          |
| 11 Re                                                                                                                | 2.316112                                                                                                                                                                                                                                                                                                                                                                                                                                                                                                                                                                                                                                                                                                                                                                                                                                                                                                                                                                                                                                                                                                                                                                                                                                                                                                                                                                                                                                                                                                                                                                                                                                                                                                                                                                                                                                                                                                                                                   | 2.903585 | 2.316906 | 2.309726 | 2.308744 |   |   |     |          |  |  |  |  |     |          |          |  |  |  |      |          |          |          |  |  |     |          |          |          |          |  |      |          |          |          |          |          |     |          |          |          |          |          |      |          |          |          |          |          |     |          |          |          |          |          |      |          |          |          |          |          |      |          |          |          |          |          |       |          |          |          |          |          |  |   |   |   |   |    |     |          |  |  |  |  |      |          |          |  |  |  |     |          |          |          |  |  |      |          |          |          |          |  |      |          |          |          |          |          |       |          |          |          |          |          |

|                                                                                                                    |          |          |          |          |          |
|--------------------------------------------------------------------------------------------------------------------|----------|----------|----------|----------|----------|
| 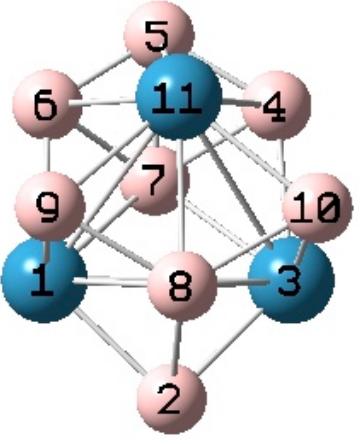 <p>9. -1019.3466271 +37.1 CS</p> | 1        | 2        | 3        | 4        | 5        |
|                                                                                                                    | 1 Re     | 0.000000 |          |          |          |
| 2 B                                                                                                                | 2.074378 | 0.000000 |          |          |          |
| 3 Re                                                                                                               | 2.919683 | 2.072740 | 0.000000 |          |          |
| 4 B                                                                                                                | 3.544798 | 3.877258 | 2.165937 | 0.000000 |          |
| 5 B                                                                                                                | 3.387330 | 4.531334 | 3.392231 | 1.625377 | 0.000000 |
| 6 B                                                                                                                | 2.166164 | 3.882747 | 3.554199 | 2.708253 | 1.625392 |
| 7 B                                                                                                                | 2.375231 | 3.216173 | 2.389981 | 1.800850 | 1.753968 |
| 8 B                                                                                                                | 2.281309 | 1.854593 | 2.280543 | 3.501870 | 4.063519 |
| 9 B                                                                                                                | 2.062842 | 3.099337 | 3.674939 | 4.071470 | 3.885387 |
| 10 B                                                                                                               | 3.673977 | 3.097989 | 2.063934 | 2.834826 | 3.889809 |
| 11 Re                                                                                                              | 2.881357 | 3.637100 | 2.880419 | 2.352819 | 2.399342 |
|                                                                                                                    | 6        | 7        | 8        | 9        | 10       |
| 6 B                                                                                                                | 0.000000 |          |          |          |          |
| 7 B                                                                                                                | 1.797124 | 0.000000 |          |          |          |
| 8 B                                                                                                                | 3.502669 | 3.456102 | 0.000000 |          |          |
| 9 B                                                                                                                | 2.826636 | 3.710522 | 1.840067 | 0.000000 |          |
| 10 B                                                                                                               | 4.074115 | 3.720900 | 1.837642 | 3.166121 | 0.000000 |
| 11 Re                                                                                                              | 2.352728 | 2.884664 | 2.281371 | 2.142981 | 2.140192 |

Table S7C. Energy ranking for all of the Cp<sub>3</sub>Re<sub>3</sub>B<sub>8</sub>H<sub>8</sub> optimized structures after B3LYP/6-31G(d) optimizations:

| No. | Structure                               | Final energy (a.u.) | ΔE (kcal/mol) |
|-----|-----------------------------------------|---------------------|---------------|
| 1   | 11v-02-PentaCapTriPri__i                | -1019.0739663       | 0.00          |
| 2   | 11v-03-TriFlatPentaCapTrigPrism__g      | -1019.0526858       | 13.35         |
| 3   | 11v-05-Oblatocloso__e Re                | -1019.0524875       | 13.48         |
| 4   | 11v-04-ThatStructure__ax                | -1019.0524671       | 13.49         |
| 5   | 11v-05-Oblatocloso__bl Re               | -1019.0522699       | 13.61         |
| 6   | 11v-03-TriFlatPentaCapTrigPrism__w_i-13 | -1019.0521615       | 13.68         |
| 7   | 11v-03-TriFlatPentaCapTrigPrism__w_r-13 | -1019.0520194       | 13.77         |
| 8   | 11v-04-ThatStructure__p                 | -1019.0497043       | 15.22         |
| 9   | 11v-05-Oblatocloso__s Re                | -1019.0495533       | 15.32         |
| 10  | 11v-05-Oblatocloso__bt Re               | -1019.0493408       | 15.45         |
| 11  | 11v-01-Icos-1vx__g                      | -1019.0457161       | 17.73         |
| 12  | 11v-02-PentaCapTriPri__s1               | -1019.0417323       | 20.23         |
| 13  | 11v-01-Icos-1vx__e                      | -1019.0417121       | 20.24         |
| 14  | 11v-03-TriFlatPentaCapTrigPrism__i      | -1019.0294896       | 27.91         |
| 15  | 11v-02-PentaCapTriPri__a                | -1019.0294507       | 27.93         |
| 16  | 11v-01-Icos-1vx__j                      | -1019.0290407       | 28.19         |
| 17  | 11v-05-Oblatocloso__m Re                | -1019.0263371       | 29.89         |
| 18  | 11v-02-PentaCapTriPri__d_i-10           | -1019.0254701       | 30.43         |
| 19  | 11v-02-PentaCapTriPri__d_r-10           | -1019.0254446       | 30.45         |

|    |                                    |               |       |
|----|------------------------------------|---------------|-------|
| 20 | 11v-02-PentaCapTriPri__o1          | -1019.0253082 | 30.53 |
| 21 | 11v-02-PentaCapTriPri__l1          | -1019.0252172 | 30.59 |
| 22 | 11v-05-Oblatocloso__l Re           | -1019.0242456 | 31.20 |
| 23 | 11v-04-ThatStructure__n            | -1019.0240258 | 31.34 |
| 24 | 11v-03-TriFlatPentaCapTrigPrism__p | -1019.0234996 | 31.67 |
| 25 | 11v-03-TriFlatPentaCapTrigPrism__q | -1019.0234707 | 31.69 |
| 26 | 11v-02-PentaCapTriPri__r1          | -1019.0227410 | 32.14 |
| 27 | 11v-02-PentaCapTriPri__f           | -1019.0223060 | 32.42 |
| 28 | 11v-04-ThatStructure__af           | -1019.0219994 | 32.61 |
| 29 | 11v-01-Icos-1vx__y                 | -1019.0196774 | 34.07 |
| 30 | 11v-05-Oblatocloso__an Re          | -1019.0194530 | 34.21 |
| 31 | 11v-01-Icos-1vx__f                 | -1019.0194080 | 34.24 |
| 32 | 11v-05-Oblatocloso__bz Re          | -1019.0190137 | 34.48 |
| 33 | 11v-05-Oblatocloso__r Re           | -1019.0184523 | 34.84 |
| 34 | 11v-05-Oblatocloso__ak Re          | -1019.0183234 | 34.92 |
| 35 | 11v-04-ThatStructure__t            | -1019.0173730 | 35.51 |
| 36 | 11v-05-Oblatocloso__ad Re          | -1019.0160643 | 36.33 |
| 37 | 11v-01-Icos-1vx__o                 | -1019.0160368 | 36.35 |
| 38 | 11v-05-Oblatocloso__bu Re          | -1019.0158951 | 36.44 |
| 39 | 11v-05-Oblatocloso__bw Re          | -1019.0158058 | 36.50 |
| 40 | 11v-05-Oblatocloso__bv Re          | -1019.0157897 | 36.51 |
| 41 | 11v-05-Oblatocloso__y Re           | -1019.0157719 | 36.52 |
| 42 | 11v-01-Icos-1vx__n                 | -1019.0156665 | 36.58 |
| 43 | 11v-03-TriFlatPentaCapTrigPrism__t | -1019.0156216 | 36.61 |
| 44 | 11v-02-PentaCapTriPri__j           | -1019.0130906 | 38.20 |
| 45 | 11v-03-TriFlatPentaCapTrigPrism__h | -1019.0118218 | 39.00 |
| 46 | 11v-01-Icos-1vx__x                 | -1019.0117573 | 39.04 |
| 47 | 11v-05-Oblatocloso__v Re           | -1019.0115073 | 39.19 |
| 48 | 11v-04-ThatStructure__s            | -1019.0113954 | 39.26 |
| 49 | 11v-02-PentaCapTriPri__b           | -1019.0110878 | 39.46 |
| 50 | 11v-05-Oblatocloso__h Re           | -1019.0077966 | 41.52 |
| 51 | 11v-05-Oblatocloso__j Re           | -1019.0069498 | 42.05 |
| 52 | 11v-05-Oblatocloso__br Re          | -1019.0066193 | 42.26 |
| 53 | 11v-01-Icos-1vx__d                 | -1019.0065645 | 42.30 |
| 54 | 11v-05-Oblatocloso__am Re          | -1019.0065571 | 42.30 |
| 55 | 11v-03-TriFlatPentaCapTrigPrism__d | -1019.0063395 | 42.44 |
| 56 | 11v-01-Icos-1vx__ac                | -1019.0057226 | 42.82 |
| 57 | 11v-05-Oblatocloso__av Re          | -1019.0044984 | 43.59 |
| 58 | 11v-01-Icos-1vx__h                 | -1019.0026935 | 44.73 |
| 59 | 11v-05-Oblatocloso__bb Re          | -1019.0016368 | 45.39 |
| 60 | 11v-01-Icos-1vx__ad                | -1019.0002587 | 46.25 |

|     |                                    |               |       |
|-----|------------------------------------|---------------|-------|
| 61  | 11v-05-Oblatocloso__p Re           | -1019.0000179 | 46.40 |
| 62  | 11v-04-ThatStructure__k            | -1018.9997452 | 46.58 |
| 63  | 11v-04-ThatStructure__al           | -1018.9996689 | 46.62 |
| 64  | 11v-04-ThatStructure__q            | -1018.9996559 | 46.63 |
| 65  | 11v-03-TriFlatPentaCapTrigPrism__u | -1018.9988743 | 47.12 |
| 66  | 11v-05-Oblatocloso__bo Re          | -1018.9987710 | 47.19 |
| 67  | 11v-03-TriFlatPentaCapTrigPrism__b | -1018.9987115 | 47.22 |
| 68  | 11v-05-Oblatocloso__bn Re          | -1018.9987068 | 47.23 |
| 69  | 11v-03-TriFlatPentaCapTrigPrism__v | -1018.9987057 | 47.23 |
| 70  | 11v-01-Icos-1vx__ab                | -1018.9986415 | 47.27 |
| 71  | 11v-04-ThatStructure__bc           | -1018.9984899 | 47.36 |
| 72  | 11v-04-ThatStructure__av           | -1018.9975053 | 47.98 |
| 73  | 11v-03-TriFlatPentaCapTrigPrism__r | -1018.9974174 | 48.04 |
| 74  | 11v-03-TriFlatPentaCapTrigPrism__f | -1018.9955997 | 49.18 |
| 75  | 11v-01-Icos-1vx__af                | -1018.9955353 | 49.22 |
| 76  | 11v-04-ThatStructure__m            | -1018.9949728 | 49.57 |
| 77  | 11v-04-ThatStructure__j            | -1018.9942512 | 50.02 |
| 78  | 11v-04-ThatStructure__i            | -1018.9941952 | 50.06 |
| 79  | 11v-04-ThatStructure__bb           | -1018.9935947 | 50.43 |
| 80  | 11v-05-Oblatocloso__at Re          | -1018.9925939 | 51.06 |
| 81  | 11v-04-ThatStructure__am           | -1018.9925426 | 51.10 |
| 82  | 11v-01-Icos-1vx__t                 | -1018.9925121 | 51.11 |
| 83  | 11v-04-ThatStructure__au           | -1018.9922286 | 51.29 |
| 84  | 11v-04-ThatStructure__c            | -1018.9905597 | 52.34 |
| 85  | 11v-05-Oblatocloso__bf Re          | -1018.9905363 | 52.35 |
| 86  | 11v-04-ThatStructure__z            | -1018.9904973 | 52.38 |
| 87  | 11v-01-Icos-1vx__a                 | -1018.9904741 | 52.39 |
| 88  | 11v-01-Icos-1vx__r                 | -1018.9904388 | 52.42 |
| 89  | 11v-04-ThatStructure__w            | -1018.9903700 | 52.46 |
| 90  | 11v-01-Icos-1vx__b                 | -1018.9903432 | 52.48 |
| 91  | 11v-01-Icos-1vx__i                 | -1018.9903105 | 52.50 |
| 92  | 11v-01-Icos-1vx__v                 | -1018.9902711 | 52.52 |
| 93  | 11v-05-Oblatocloso__ay Re          | -1018.9901748 | 52.58 |
| 94  | 11v-05-Oblatocloso__o Re           | -1018.9899154 | 52.74 |
| 95  | 11v-05-Oblatocloso__u Re           | -1018.9895116 | 53.00 |
| 96  | 11v-04-ThatStructure__f            | -1018.9893004 | 53.13 |
| 97  | 11v-05-Oblatocloso__q Re           | -1018.9891581 | 53.22 |
| 98  | 11v-05-Oblatocloso__n Re           | -1018.9889384 | 53.36 |
| 99  | 11v-05-Oblatocloso__as Re          | -1018.9888820 | 53.39 |
| 100 | 11v-05-Oblatocloso__ac Re          | -1018.9888314 | 53.42 |
| 101 | 11v-05-Oblatocloso__t Re           | -1018.9883053 | 53.75 |

|     |                                    |               |       |
|-----|------------------------------------|---------------|-------|
| 102 | 11v-05-Oblatocloso__k Re           | -1018.9881873 | 53.83 |
| 103 | 11v-03-TriFlatPentaCapTrigPrism__x | -1018.9880563 | 53.91 |
| 104 | 11v-03-TriFlatPentaCapTrigPrism__s | -1018.9879772 | 53.96 |
| 105 | 11v-04-ThatStructure__ai           | -1018.9879667 | 53.97 |
| 106 | 11v-04-ThatStructure__ba           | -1018.9878687 | 54.03 |
| 107 | 11v-04-ThatStructure__as           | -1018.9878680 | 54.03 |
| 108 | 11v-01-Icos-1vx__ae                | -1018.9875906 | 54.20 |
| 109 | 11v-03-TriFlatPentaCapTrigPrism__z | -1018.9871729 | 54.46 |
| 110 | 11v-04-ThatStructure__u            | -1018.9869966 | 54.58 |
| 111 | 11v-03-TriFlatPentaCapTrigPrism__a | -1018.9867184 | 54.75 |
| 112 | 11v-05-Oblatocloso__f Re           | -1018.9860699 | 55.16 |
| 113 | 11v-04-ThatStructure__ak           | -1018.9855762 | 55.47 |
| 114 | 11v-05-Oblatocloso__aw Re          | -1018.9847739 | 55.97 |
| 115 | 11v-04-ThatStructure__r            | -1018.9835506 | 56.74 |
| 116 | 11v-03-TriFlatPentaCapTrigPrism__m | -1018.9815562 | 57.99 |
| 117 | 11v-03-TriFlatPentaCapTrigPrism__j | -1018.9810619 | 58.30 |
| 118 | 11v-05-Oblatocloso__ba Re          | -1018.9810480 | 58.31 |
| 119 | 11v-05-Oblatocloso__d Re           | -1018.9810450 | 58.31 |
| 120 | 11v-03-TriFlatPentaCapTrigPrism__e | -1018.9809862 | 58.35 |
| 121 | 11v-05-Oblatocloso__bs Re          | -1018.9809292 | 58.38 |
| 122 | 11v-04-ThatStructure__h            | -1018.9791757 | 59.48 |
| 123 | 11v-05-Oblatocloso__ah Re          | -1018.9788526 | 59.69 |
| 124 | 11v-02-PentaCapTriPri__m1          | -1018.9780375 | 60.20 |
| 125 | 11v-05-Oblatocloso__ae Re          | -1018.9775960 | 60.47 |
| 126 | 11v-04-ThatStructure__ao           | -1018.9770366 | 60.83 |
| 127 | 11v-04-ThatStructure__d            | -1018.9766885 | 61.04 |
| 128 | 11v-02-PentaCapTriPri__h           | -1018.9765709 | 61.12 |
| 129 | 11v-05-Oblatocloso__be Re          | -1018.9751412 | 62.01 |
| 130 | 11v-05-Oblatocloso__aa Re          | -1018.9747602 | 62.25 |
| 131 | 11v-03-TriFlatPentaCapTrigPrism__y | -1018.9745277 | 62.40 |
| 132 | 11v-01-Icos-1vx__ag                | -1018.9744179 | 62.47 |
| 133 | 11v-03-TriFlatPentaCapTrigPrism__k | -1018.9742208 | 62.59 |
| 134 | 11v-05-Oblatocloso__ar Re          | -1018.9741689 | 62.62 |
| 135 | 11v-04-ThatStructure__a            | -1018.9740665 | 62.69 |
| 136 | 11v-02-PentaCapTriPri__k1          | -1018.9738702 | 62.81 |
| 137 | 11v-01-Icos-1vx__aj                | -1018.9737482 | 62.89 |
| 138 | 11v-01-Icos-1vx__aa                | -1018.9725047 | 63.67 |
| 139 | 11v-05-Oblatocloso__ao Re          | -1018.9723600 | 63.76 |
| 140 | 11v-05-Oblatocloso__ap Re          | -1018.9722144 | 63.85 |
| 141 | 11v-01-Icos-1vx__w_i-26            | -1018.9717142 | 64.17 |
| 142 | 11v-04-ThatStructure__aw           | -1018.9716028 | 64.24 |

|     |                                    |               |       |
|-----|------------------------------------|---------------|-------|
| 143 | 11v-01-Icos-1vx__z                 | -1018.9715868 | 64.25 |
| 144 | 11v-01-Icos-1vx__w_r-26            | -1018.9714564 | 64.33 |
| 145 | 11v-05-Oblatocloso__bp Re          | -1018.9714531 | 64.33 |
| 146 | 11v-05-Oblatocloso__bk Re          | -1018.9695244 | 65.54 |
| 147 | 11v-02-PentaCapTriPri__q1          | -1018.9689575 | 65.90 |
| 148 | 11v-05-Oblatocloso__by Re          | -1018.9685426 | 66.16 |
| 149 | 11v-03-TriFlatPentaCapTrigPrism__c | -1018.9684809 | 66.19 |
| 150 | 11v-04-ThatStructure__e            | -1018.9684762 | 66.20 |
| 151 | 11v-01-Icos-1vx__m                 | -1018.9671559 | 67.03 |
| 152 | 11v-05-Oblatocloso__b Re           | -1018.9657733 | 67.89 |
| 153 | 11v-01-Icos-1vx__q                 | -1018.9651400 | 68.29 |
| 154 | 11v-03-TriFlatPentaCapTrigPrism__l | -1018.9647017 | 68.57 |
| 155 | 11v-01-Icos-1vx__k                 | -1018.9645445 | 68.66 |
| 156 | 11v-01-Icos-1vx__s                 | -1018.9645107 | 68.69 |
| 157 | 11v-04-ThatStructure__v            | -1018.9641169 | 68.93 |
| 158 | 11v-04-ThatStructure__aj           | -1018.9629220 | 69.68 |
| 159 | 11v-05-Oblatocloso__bq Re          | -1018.9626905 | 69.83 |
| 160 | 11v-05-Oblatocloso__x Re           | -1018.9620636 | 70.22 |
| 161 | 11v-05-Oblatocloso__bg Re          | -1018.9620312 | 70.24 |
| 162 | 11v-01-Icos-1vx__c                 | -1018.9616652 | 70.47 |
| 163 | 11v-05-Oblatocloso__bx Re          | -1018.9616015 | 70.51 |
| 164 | 11v-04-ThatStructure__ad           | -1018.9615224 | 70.56 |
| 165 | 11v-04-ThatStructure__ah           | -1018.9612416 | 70.74 |
| 166 | 11v-04-ThatStructure__ar           | -1018.9604713 | 71.22 |
| 167 | 11v-04-ThatStructure__az           | -1018.9597391 | 71.68 |
| 168 | 11v-04-ThatStructure__l            | -1018.9597340 | 71.68 |
| 169 | 11v-01-Icos-1vx__l                 | -1018.9589260 | 72.19 |
| 170 | 11v-02-PentaCapTriPri__e           | -1018.9578749 | 72.85 |
| 171 | 11v-02-PentaCapTriPri__p1          | -1018.9566955 | 73.59 |
| 172 | 11v-05-Oblatocloso__i Re           | -1018.9566867 | 73.60 |
| 173 | 11v-04-ThatStructure__ac           | -1018.9552424 | 74.50 |
| 174 | 11v-01-Icos-1vx__ah                | -1018.9548747 | 74.73 |
| 175 | 11v-01-Icos-1vx__p                 | -1018.9548611 | 74.74 |
| 176 | 11v-02-PentaCapTriPri__t1          | -1018.9544630 | 74.99 |
| 177 | 11v-04-ThatStructure__at           | -1018.9536885 | 75.48 |
| 178 | 11v-04-ThatStructure__an           | -1018.9536509 | 75.50 |
| 179 | 11v-05-Oblatocloso__bj Re          | -1018.9518536 | 76.63 |
| 180 | 11v-02-PentaCapTriPri__c           | -1018.9515189 | 76.84 |
| 181 | 11v-05-Oblatocloso__w Re           | -1018.9514747 | 76.87 |
| 182 | 11v-01-Icos-1vx__u                 | -1018.9511253 | 77.09 |
| 183 | 11v-04-ThatStructure__aa           | -1018.9509904 | 77.17 |

|     |                                    |               |        |
|-----|------------------------------------|---------------|--------|
| 184 | 11v-05-Oblatocloso__bc Re          | -1018.9508957 | 77.23  |
| 185 | 11v-01-Icos-1vx__ai                | -1018.9508364 | 77.27  |
| 186 | 11v-05-Oblatocloso__af Re          | -1018.9500874 | 77.74  |
| 187 | 11v-05-Oblatocloso__bi Re          | -1018.9482005 | 78.92  |
| 188 | 11v-04-ThatStructure__g            | -1018.9466132 | 79.92  |
| 189 | 11v-04-ThatStructure__ab           | -1018.9451450 | 80.84  |
| 190 | 11v-05-Oblatocloso__au Re          | -1018.9444786 | 81.26  |
| 191 | 11v-02-PentaCapTriPri__g_i-10      | -1018.9419671 | 82.83  |
| 192 | 11v-02-PentaCapTriPri__g_r-10      | -1018.9419252 | 82.86  |
| 193 | 11v-05-Oblatocloso__az Re          | -1018.9414983 | 83.13  |
| 194 | 11v-04-ThatStructure__x            | -1018.9399236 | 84.11  |
| 195 | 11v-05-Oblatocloso__bm Re          | -1018.9384392 | 85.05  |
| 196 | 11v-05-Oblatocloso__ab Re          | -1018.9363594 | 86.35  |
| 197 | 11v-04-ThatStructure__y            | -1018.9360330 | 86.56  |
| 198 | 11v-04-ThatStructure__aq           | -1018.9358839 | 86.65  |
| 199 | 11v-04-ThatStructure__ay           | -1018.9345385 | 87.49  |
| 200 | 11v-04-ThatStructure__ae           | -1018.9344187 | 87.57  |
| 201 | 11v-05-Oblatocloso__a Re           | -1018.9312239 | 89.57  |
| 202 | 11v-05-Oblatocloso__ag Re          | -1018.9292532 | 90.81  |
| 203 | 11v-04-ThatStructure__b_r-21       | -1018.9280669 | 91.55  |
| 204 | 11v-05-Oblatocloso__g Re           | -1018.9279954 | 91.60  |
| 205 | 11v-04-ThatStructure__b_i-21       | -1018.9278830 | 91.67  |
| 206 | 11v-05-Oblatocloso__z Re           | -1018.9232950 | 94.55  |
| 207 | 11v-05-Oblatocloso__ax Re          | -1018.9215374 | 95.65  |
| 208 | 11v-04-ThatStructure__ag           | -1018.9212290 | 95.85  |
| 209 | 11v-04-ThatStructure__ap           | -1018.9195274 | 96.91  |
| 210 | 11v-03-TriFlatPentaCapTrigPrism__o | -1018.9162718 | 98.96  |
| 211 | 11v-03-TriFlatPentaCapTrigPrism__n | -1018.9162074 | 99.00  |
| 212 | 11v-05-Oblatocloso__aq Re          | -1018.9135071 | 100.69 |
| 213 | 11v-05-Oblatocloso__bd Re          | -1018.9124797 | 101.34 |
| 214 | 11v-05-Oblatocloso__ai Re          | -1018.9118580 | 101.73 |
| 215 | 11v-05-Oblatocloso__c Re           | -1018.9087008 | 103.71 |
| 216 | 11v-04-ThatStructure__o            | -1018.9082756 | 103.97 |
| 217 | 11v-05-Oblatocloso__bh Re          | -1018.9052634 | 105.86 |
| 218 | 11v-05-Oblatocloso__al Re_i-20     | -1018.8994694 | 109.50 |
| 219 | 11v-05-Oblatocloso__al Re_r-20     | -1018.8992934 | 109.61 |
| 220 | 11v-02-PentaCapTriPri__n1          | -1018.8990890 | 109.74 |
| 221 | 11v-05-Oblatocloso__aj Re          | -1018.8949259 | 112.35 |



Table S8A. Initial  $\text{Cp}_3\text{Re}_3\text{B}_9\text{H}_9$  structures, 39 structures.

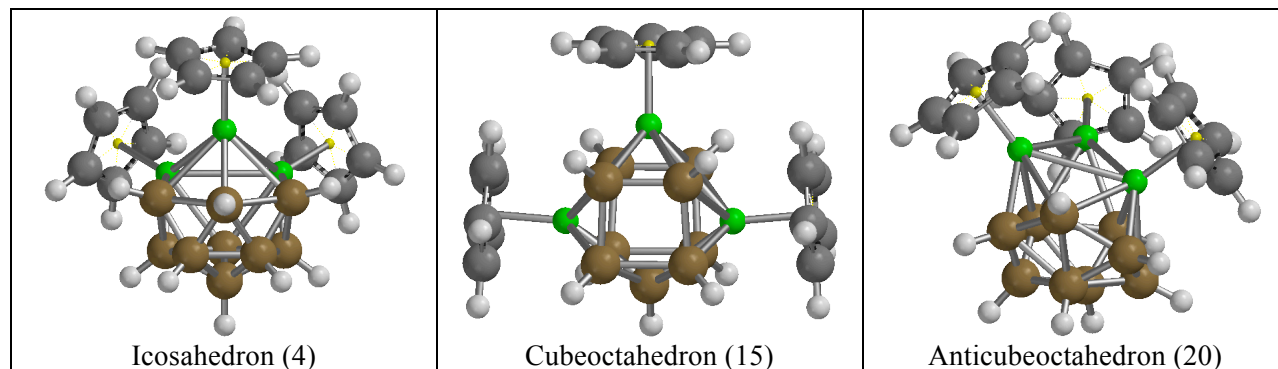

Table S8B. Distance table for the lowest-lying  $\text{Cp}_3\text{Re}_3\text{B}_9\text{H}_9$  structures after M06L/6-311G(d,p) optimization. Included are the ZPcorrected E (a.u.), relative energy (kcal/mol) and symmetry.

| 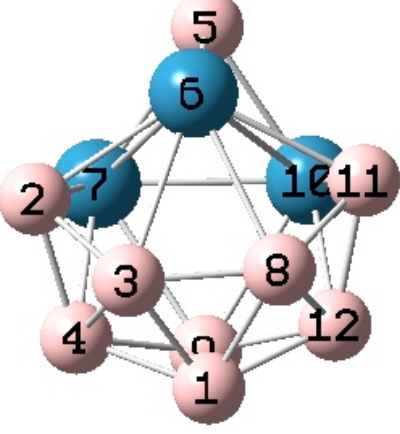 <p>1. -1044.82987860 0.0 <math>C_1(C_s)</math></p> | <table border="1"> <thead> <tr> <th></th> <th>1</th> <th>2</th> <th>3</th> <th>4</th> <th>5</th> </tr> </thead> <tbody> <tr><td>1 B</td><td>0.000000</td><td></td><td></td><td></td><td></td></tr> <tr><td>2 B</td><td>2.932523</td><td>0.000000</td><td></td><td></td><td></td></tr> <tr><td>3 B</td><td>1.764245</td><td>1.714594</td><td>0.000000</td><td></td><td></td></tr> <tr><td>4 B</td><td>1.757907</td><td>1.761977</td><td>1.803338</td><td>0.000000</td><td></td></tr> <tr><td>5 B</td><td>4.480038</td><td>3.256602</td><td>4.028497</td><td>3.993841</td><td>0.000000</td></tr> <tr><td>6 Re</td><td>3.369834</td><td>2.196196</td><td>2.369217</td><td>3.214706</td><td>2.104350</td></tr> <tr><td>7 Re</td><td>3.394769</td><td>2.163923</td><td>3.215648</td><td>2.270474</td><td>2.217661</td></tr> <tr><td>8 B</td><td>1.774816</td><td>3.047991</td><td>1.729315</td><td>2.878307</td><td>3.887050</td></tr> <tr><td>9 B</td><td>1.753452</td><td>3.074358</td><td>2.845494</td><td>1.794207</td><td>3.694911</td></tr> <tr><td>10 Re</td><td>3.485035</td><td>3.844132</td><td>3.951709</td><td>3.585767</td><td>2.162996</td></tr> <tr><td>11 B</td><td>2.959477</td><td>3.767864</td><td>3.111075</td><td>3.773572</td><td>2.962347</td></tr> <tr><td>12 B</td><td>1.771090</td><td>3.775357</td><td>2.904679</td><td>2.956071</td><td>3.836852</td></tr> <tr> <td></td> <td>6</td> <td>7</td> <td>8</td> <td>9</td> <td>10</td> </tr> <tr><td>7 Re</td><td>2.756239</td><td>0.000000</td><td></td><td></td><td></td></tr> <tr><td>8 B</td><td>2.330273</td><td>3.740215</td><td>0.000000</td><td></td><td></td></tr> <tr><td>9 B</td><td>3.496535</td><td>2.312634</td><td>2.823850</td><td>0.000000</td><td></td></tr> <tr><td>10 Re</td><td>2.972088</td><td>2.440717</td><td>3.292651</td><td>2.355315</td><td>0.000000</td></tr> <tr><td>11 B</td><td>2.216951</td><td>3.610670</td><td>1.731855</td><td>3.055753</td><td>2.183199</td></tr> <tr><td>12 B</td><td>3.229801</td><td>3.447460</td><td>1.802655</td><td>1.789209</td><td>2.277051</td></tr> <tr> <td></td> <td>11</td> <td>12</td> <td></td> <td></td> <td></td> </tr> <tr><td>12 B</td><td>1.764894</td><td>0.000000</td><td></td><td></td><td></td></tr> </tbody> </table> |          | 1        | 2        | 3        | 4 | 5 | 1 B  | 0.000000 |  |  |  |  | 2 B | 2.932523 | 0.000000 |  |  |  | 3 B  | 1.764245 | 1.714594 | 0.000000 |  |  | 4 B | 1.757907 | 1.761977 | 1.803338 | 0.000000 |  | 5 B | 4.480038 | 3.256602 | 4.028497 | 3.993841 | 0.000000 | 6 Re | 3.369834 | 2.196196 | 2.369217 | 3.214706 | 2.104350 | 7 Re | 3.394769 | 2.163923 | 3.215648 | 2.270474 | 2.217661 | 8 B | 1.774816 | 3.047991 | 1.729315 | 2.878307 | 3.887050 | 9 B | 1.753452 | 3.074358 | 2.845494 | 1.794207 | 3.694911 | 10 Re | 3.485035 | 3.844132 | 3.951709 | 3.585767 | 2.162996 | 11 B | 2.959477 | 3.767864 | 3.111075 | 3.773572 | 2.962347 | 12 B  | 1.771090 | 3.775357 | 2.904679 | 2.956071 | 3.836852 |  | 6 | 7 | 8 | 9 | 10 | 7 Re | 2.756239 | 0.000000 |  |  |  | 8 B | 2.330273 | 3.740215 | 0.000000 |  |  | 9 B | 3.496535 | 2.312634 | 2.823850 | 0.000000 |  | 10 Re | 2.972088 | 2.440717 | 3.292651 | 2.355315 | 0.000000 | 11 B | 2.216951 | 3.610670 | 1.731855 | 3.055753 | 2.183199 | 12 B  | 3.229801 | 3.447460 | 1.802655 | 1.789209 | 2.277051 |  | 11 | 12 |  |  |  | 12 B  | 1.764894 | 0.000000 |  |  |  |
|--------------------------------------------------------------------------------------------------------------------------------------|------------------------------------------------------------------------------------------------------------------------------------------------------------------------------------------------------------------------------------------------------------------------------------------------------------------------------------------------------------------------------------------------------------------------------------------------------------------------------------------------------------------------------------------------------------------------------------------------------------------------------------------------------------------------------------------------------------------------------------------------------------------------------------------------------------------------------------------------------------------------------------------------------------------------------------------------------------------------------------------------------------------------------------------------------------------------------------------------------------------------------------------------------------------------------------------------------------------------------------------------------------------------------------------------------------------------------------------------------------------------------------------------------------------------------------------------------------------------------------------------------------------------------------------------------------------------------------------------------------------------------------------------------------------------------------------------------------------------------------------------------------------------------------------------------------------------------------------------------------------------------------------------------------------------------------------------------------------------------------------------------------------------------------------------------------------------------------------------------------------------------------------------------------------------------------------------------------------------------------------------------------------------|----------|----------|----------|----------|---|---|------|----------|--|--|--|--|-----|----------|----------|--|--|--|------|----------|----------|----------|--|--|-----|----------|----------|----------|----------|--|-----|----------|----------|----------|----------|----------|------|----------|----------|----------|----------|----------|------|----------|----------|----------|----------|----------|-----|----------|----------|----------|----------|----------|-----|----------|----------|----------|----------|----------|-------|----------|----------|----------|----------|----------|------|----------|----------|----------|----------|----------|-------|----------|----------|----------|----------|----------|--|---|---|---|---|----|------|----------|----------|--|--|--|-----|----------|----------|----------|--|--|-----|----------|----------|----------|----------|--|-------|----------|----------|----------|----------|----------|------|----------|----------|----------|----------|----------|-------|----------|----------|----------|----------|----------|--|----|----|--|--|--|-------|----------|----------|--|--|--|
|                                                                                                                                      | 1                                                                                                                                                                                                                                                                                                                                                                                                                                                                                                                                                                                                                                                                                                                                                                                                                                                                                                                                                                                                                                                                                                                                                                                                                                                                                                                                                                                                                                                                                                                                                                                                                                                                                                                                                                                                                                                                                                                                                                                                                                                                                                                                                                                                                                                                      | 2        | 3        | 4        | 5        |   |   |      |          |  |  |  |  |     |          |          |  |  |  |      |          |          |          |  |  |     |          |          |          |          |  |     |          |          |          |          |          |      |          |          |          |          |          |      |          |          |          |          |          |     |          |          |          |          |          |     |          |          |          |          |          |       |          |          |          |          |          |      |          |          |          |          |          |       |          |          |          |          |          |  |   |   |   |   |    |      |          |          |  |  |  |     |          |          |          |  |  |     |          |          |          |          |  |       |          |          |          |          |          |      |          |          |          |          |          |       |          |          |          |          |          |  |    |    |  |  |  |       |          |          |  |  |  |
| 1 B                                                                                                                                  | 0.000000                                                                                                                                                                                                                                                                                                                                                                                                                                                                                                                                                                                                                                                                                                                                                                                                                                                                                                                                                                                                                                                                                                                                                                                                                                                                                                                                                                                                                                                                                                                                                                                                                                                                                                                                                                                                                                                                                                                                                                                                                                                                                                                                                                                                                                                               |          |          |          |          |   |   |      |          |  |  |  |  |     |          |          |  |  |  |      |          |          |          |  |  |     |          |          |          |          |  |     |          |          |          |          |          |      |          |          |          |          |          |      |          |          |          |          |          |     |          |          |          |          |          |     |          |          |          |          |          |       |          |          |          |          |          |      |          |          |          |          |          |       |          |          |          |          |          |  |   |   |   |   |    |      |          |          |  |  |  |     |          |          |          |  |  |     |          |          |          |          |  |       |          |          |          |          |          |      |          |          |          |          |          |       |          |          |          |          |          |  |    |    |  |  |  |       |          |          |  |  |  |
| 2 B                                                                                                                                  | 2.932523                                                                                                                                                                                                                                                                                                                                                                                                                                                                                                                                                                                                                                                                                                                                                                                                                                                                                                                                                                                                                                                                                                                                                                                                                                                                                                                                                                                                                                                                                                                                                                                                                                                                                                                                                                                                                                                                                                                                                                                                                                                                                                                                                                                                                                                               | 0.000000 |          |          |          |   |   |      |          |  |  |  |  |     |          |          |  |  |  |      |          |          |          |  |  |     |          |          |          |          |  |     |          |          |          |          |          |      |          |          |          |          |          |      |          |          |          |          |          |     |          |          |          |          |          |     |          |          |          |          |          |       |          |          |          |          |          |      |          |          |          |          |          |       |          |          |          |          |          |  |   |   |   |   |    |      |          |          |  |  |  |     |          |          |          |  |  |     |          |          |          |          |  |       |          |          |          |          |          |      |          |          |          |          |          |       |          |          |          |          |          |  |    |    |  |  |  |       |          |          |  |  |  |
| 3 B                                                                                                                                  | 1.764245                                                                                                                                                                                                                                                                                                                                                                                                                                                                                                                                                                                                                                                                                                                                                                                                                                                                                                                                                                                                                                                                                                                                                                                                                                                                                                                                                                                                                                                                                                                                                                                                                                                                                                                                                                                                                                                                                                                                                                                                                                                                                                                                                                                                                                                               | 1.714594 | 0.000000 |          |          |   |   |      |          |  |  |  |  |     |          |          |  |  |  |      |          |          |          |  |  |     |          |          |          |          |  |     |          |          |          |          |          |      |          |          |          |          |          |      |          |          |          |          |          |     |          |          |          |          |          |     |          |          |          |          |          |       |          |          |          |          |          |      |          |          |          |          |          |       |          |          |          |          |          |  |   |   |   |   |    |      |          |          |  |  |  |     |          |          |          |  |  |     |          |          |          |          |  |       |          |          |          |          |          |      |          |          |          |          |          |       |          |          |          |          |          |  |    |    |  |  |  |       |          |          |  |  |  |
| 4 B                                                                                                                                  | 1.757907                                                                                                                                                                                                                                                                                                                                                                                                                                                                                                                                                                                                                                                                                                                                                                                                                                                                                                                                                                                                                                                                                                                                                                                                                                                                                                                                                                                                                                                                                                                                                                                                                                                                                                                                                                                                                                                                                                                                                                                                                                                                                                                                                                                                                                                               | 1.761977 | 1.803338 | 0.000000 |          |   |   |      |          |  |  |  |  |     |          |          |  |  |  |      |          |          |          |  |  |     |          |          |          |          |  |     |          |          |          |          |          |      |          |          |          |          |          |      |          |          |          |          |          |     |          |          |          |          |          |     |          |          |          |          |          |       |          |          |          |          |          |      |          |          |          |          |          |       |          |          |          |          |          |  |   |   |   |   |    |      |          |          |  |  |  |     |          |          |          |  |  |     |          |          |          |          |  |       |          |          |          |          |          |      |          |          |          |          |          |       |          |          |          |          |          |  |    |    |  |  |  |       |          |          |  |  |  |
| 5 B                                                                                                                                  | 4.480038                                                                                                                                                                                                                                                                                                                                                                                                                                                                                                                                                                                                                                                                                                                                                                                                                                                                                                                                                                                                                                                                                                                                                                                                                                                                                                                                                                                                                                                                                                                                                                                                                                                                                                                                                                                                                                                                                                                                                                                                                                                                                                                                                                                                                                                               | 3.256602 | 4.028497 | 3.993841 | 0.000000 |   |   |      |          |  |  |  |  |     |          |          |  |  |  |      |          |          |          |  |  |     |          |          |          |          |  |     |          |          |          |          |          |      |          |          |          |          |          |      |          |          |          |          |          |     |          |          |          |          |          |     |          |          |          |          |          |       |          |          |          |          |          |      |          |          |          |          |          |       |          |          |          |          |          |  |   |   |   |   |    |      |          |          |  |  |  |     |          |          |          |  |  |     |          |          |          |          |  |       |          |          |          |          |          |      |          |          |          |          |          |       |          |          |          |          |          |  |    |    |  |  |  |       |          |          |  |  |  |
| 6 Re                                                                                                                                 | 3.369834                                                                                                                                                                                                                                                                                                                                                                                                                                                                                                                                                                                                                                                                                                                                                                                                                                                                                                                                                                                                                                                                                                                                                                                                                                                                                                                                                                                                                                                                                                                                                                                                                                                                                                                                                                                                                                                                                                                                                                                                                                                                                                                                                                                                                                                               | 2.196196 | 2.369217 | 3.214706 | 2.104350 |   |   |      |          |  |  |  |  |     |          |          |  |  |  |      |          |          |          |  |  |     |          |          |          |          |  |     |          |          |          |          |          |      |          |          |          |          |          |      |          |          |          |          |          |     |          |          |          |          |          |     |          |          |          |          |          |       |          |          |          |          |          |      |          |          |          |          |          |       |          |          |          |          |          |  |   |   |   |   |    |      |          |          |  |  |  |     |          |          |          |  |  |     |          |          |          |          |  |       |          |          |          |          |          |      |          |          |          |          |          |       |          |          |          |          |          |  |    |    |  |  |  |       |          |          |  |  |  |
| 7 Re                                                                                                                                 | 3.394769                                                                                                                                                                                                                                                                                                                                                                                                                                                                                                                                                                                                                                                                                                                                                                                                                                                                                                                                                                                                                                                                                                                                                                                                                                                                                                                                                                                                                                                                                                                                                                                                                                                                                                                                                                                                                                                                                                                                                                                                                                                                                                                                                                                                                                                               | 2.163923 | 3.215648 | 2.270474 | 2.217661 |   |   |      |          |  |  |  |  |     |          |          |  |  |  |      |          |          |          |  |  |     |          |          |          |          |  |     |          |          |          |          |          |      |          |          |          |          |          |      |          |          |          |          |          |     |          |          |          |          |          |     |          |          |          |          |          |       |          |          |          |          |          |      |          |          |          |          |          |       |          |          |          |          |          |  |   |   |   |   |    |      |          |          |  |  |  |     |          |          |          |  |  |     |          |          |          |          |  |       |          |          |          |          |          |      |          |          |          |          |          |       |          |          |          |          |          |  |    |    |  |  |  |       |          |          |  |  |  |
| 8 B                                                                                                                                  | 1.774816                                                                                                                                                                                                                                                                                                                                                                                                                                                                                                                                                                                                                                                                                                                                                                                                                                                                                                                                                                                                                                                                                                                                                                                                                                                                                                                                                                                                                                                                                                                                                                                                                                                                                                                                                                                                                                                                                                                                                                                                                                                                                                                                                                                                                                                               | 3.047991 | 1.729315 | 2.878307 | 3.887050 |   |   |      |          |  |  |  |  |     |          |          |  |  |  |      |          |          |          |  |  |     |          |          |          |          |  |     |          |          |          |          |          |      |          |          |          |          |          |      |          |          |          |          |          |     |          |          |          |          |          |     |          |          |          |          |          |       |          |          |          |          |          |      |          |          |          |          |          |       |          |          |          |          |          |  |   |   |   |   |    |      |          |          |  |  |  |     |          |          |          |  |  |     |          |          |          |          |  |       |          |          |          |          |          |      |          |          |          |          |          |       |          |          |          |          |          |  |    |    |  |  |  |       |          |          |  |  |  |
| 9 B                                                                                                                                  | 1.753452                                                                                                                                                                                                                                                                                                                                                                                                                                                                                                                                                                                                                                                                                                                                                                                                                                                                                                                                                                                                                                                                                                                                                                                                                                                                                                                                                                                                                                                                                                                                                                                                                                                                                                                                                                                                                                                                                                                                                                                                                                                                                                                                                                                                                                                               | 3.074358 | 2.845494 | 1.794207 | 3.694911 |   |   |      |          |  |  |  |  |     |          |          |  |  |  |      |          |          |          |  |  |     |          |          |          |          |  |     |          |          |          |          |          |      |          |          |          |          |          |      |          |          |          |          |          |     |          |          |          |          |          |     |          |          |          |          |          |       |          |          |          |          |          |      |          |          |          |          |          |       |          |          |          |          |          |  |   |   |   |   |    |      |          |          |  |  |  |     |          |          |          |  |  |     |          |          |          |          |  |       |          |          |          |          |          |      |          |          |          |          |          |       |          |          |          |          |          |  |    |    |  |  |  |       |          |          |  |  |  |
| 10 Re                                                                                                                                | 3.485035                                                                                                                                                                                                                                                                                                                                                                                                                                                                                                                                                                                                                                                                                                                                                                                                                                                                                                                                                                                                                                                                                                                                                                                                                                                                                                                                                                                                                                                                                                                                                                                                                                                                                                                                                                                                                                                                                                                                                                                                                                                                                                                                                                                                                                                               | 3.844132 | 3.951709 | 3.585767 | 2.162996 |   |   |      |          |  |  |  |  |     |          |          |  |  |  |      |          |          |          |  |  |     |          |          |          |          |  |     |          |          |          |          |          |      |          |          |          |          |          |      |          |          |          |          |          |     |          |          |          |          |          |     |          |          |          |          |          |       |          |          |          |          |          |      |          |          |          |          |          |       |          |          |          |          |          |  |   |   |   |   |    |      |          |          |  |  |  |     |          |          |          |  |  |     |          |          |          |          |  |       |          |          |          |          |          |      |          |          |          |          |          |       |          |          |          |          |          |  |    |    |  |  |  |       |          |          |  |  |  |
| 11 B                                                                                                                                 | 2.959477                                                                                                                                                                                                                                                                                                                                                                                                                                                                                                                                                                                                                                                                                                                                                                                                                                                                                                                                                                                                                                                                                                                                                                                                                                                                                                                                                                                                                                                                                                                                                                                                                                                                                                                                                                                                                                                                                                                                                                                                                                                                                                                                                                                                                                                               | 3.767864 | 3.111075 | 3.773572 | 2.962347 |   |   |      |          |  |  |  |  |     |          |          |  |  |  |      |          |          |          |  |  |     |          |          |          |          |  |     |          |          |          |          |          |      |          |          |          |          |          |      |          |          |          |          |          |     |          |          |          |          |          |     |          |          |          |          |          |       |          |          |          |          |          |      |          |          |          |          |          |       |          |          |          |          |          |  |   |   |   |   |    |      |          |          |  |  |  |     |          |          |          |  |  |     |          |          |          |          |  |       |          |          |          |          |          |      |          |          |          |          |          |       |          |          |          |          |          |  |    |    |  |  |  |       |          |          |  |  |  |
| 12 B                                                                                                                                 | 1.771090                                                                                                                                                                                                                                                                                                                                                                                                                                                                                                                                                                                                                                                                                                                                                                                                                                                                                                                                                                                                                                                                                                                                                                                                                                                                                                                                                                                                                                                                                                                                                                                                                                                                                                                                                                                                                                                                                                                                                                                                                                                                                                                                                                                                                                                               | 3.775357 | 2.904679 | 2.956071 | 3.836852 |   |   |      |          |  |  |  |  |     |          |          |  |  |  |      |          |          |          |  |  |     |          |          |          |          |  |     |          |          |          |          |          |      |          |          |          |          |          |      |          |          |          |          |          |     |          |          |          |          |          |     |          |          |          |          |          |       |          |          |          |          |          |      |          |          |          |          |          |       |          |          |          |          |          |  |   |   |   |   |    |      |          |          |  |  |  |     |          |          |          |  |  |     |          |          |          |          |  |       |          |          |          |          |          |      |          |          |          |          |          |       |          |          |          |          |          |  |    |    |  |  |  |       |          |          |  |  |  |
|                                                                                                                                      | 6                                                                                                                                                                                                                                                                                                                                                                                                                                                                                                                                                                                                                                                                                                                                                                                                                                                                                                                                                                                                                                                                                                                                                                                                                                                                                                                                                                                                                                                                                                                                                                                                                                                                                                                                                                                                                                                                                                                                                                                                                                                                                                                                                                                                                                                                      | 7        | 8        | 9        | 10       |   |   |      |          |  |  |  |  |     |          |          |  |  |  |      |          |          |          |  |  |     |          |          |          |          |  |     |          |          |          |          |          |      |          |          |          |          |          |      |          |          |          |          |          |     |          |          |          |          |          |     |          |          |          |          |          |       |          |          |          |          |          |      |          |          |          |          |          |       |          |          |          |          |          |  |   |   |   |   |    |      |          |          |  |  |  |     |          |          |          |  |  |     |          |          |          |          |  |       |          |          |          |          |          |      |          |          |          |          |          |       |          |          |          |          |          |  |    |    |  |  |  |       |          |          |  |  |  |
| 7 Re                                                                                                                                 | 2.756239                                                                                                                                                                                                                                                                                                                                                                                                                                                                                                                                                                                                                                                                                                                                                                                                                                                                                                                                                                                                                                                                                                                                                                                                                                                                                                                                                                                                                                                                                                                                                                                                                                                                                                                                                                                                                                                                                                                                                                                                                                                                                                                                                                                                                                                               | 0.000000 |          |          |          |   |   |      |          |  |  |  |  |     |          |          |  |  |  |      |          |          |          |  |  |     |          |          |          |          |  |     |          |          |          |          |          |      |          |          |          |          |          |      |          |          |          |          |          |     |          |          |          |          |          |     |          |          |          |          |          |       |          |          |          |          |          |      |          |          |          |          |          |       |          |          |          |          |          |  |   |   |   |   |    |      |          |          |  |  |  |     |          |          |          |  |  |     |          |          |          |          |  |       |          |          |          |          |          |      |          |          |          |          |          |       |          |          |          |          |          |  |    |    |  |  |  |       |          |          |  |  |  |
| 8 B                                                                                                                                  | 2.330273                                                                                                                                                                                                                                                                                                                                                                                                                                                                                                                                                                                                                                                                                                                                                                                                                                                                                                                                                                                                                                                                                                                                                                                                                                                                                                                                                                                                                                                                                                                                                                                                                                                                                                                                                                                                                                                                                                                                                                                                                                                                                                                                                                                                                                                               | 3.740215 | 0.000000 |          |          |   |   |      |          |  |  |  |  |     |          |          |  |  |  |      |          |          |          |  |  |     |          |          |          |          |  |     |          |          |          |          |          |      |          |          |          |          |          |      |          |          |          |          |          |     |          |          |          |          |          |     |          |          |          |          |          |       |          |          |          |          |          |      |          |          |          |          |          |       |          |          |          |          |          |  |   |   |   |   |    |      |          |          |  |  |  |     |          |          |          |  |  |     |          |          |          |          |  |       |          |          |          |          |          |      |          |          |          |          |          |       |          |          |          |          |          |  |    |    |  |  |  |       |          |          |  |  |  |
| 9 B                                                                                                                                  | 3.496535                                                                                                                                                                                                                                                                                                                                                                                                                                                                                                                                                                                                                                                                                                                                                                                                                                                                                                                                                                                                                                                                                                                                                                                                                                                                                                                                                                                                                                                                                                                                                                                                                                                                                                                                                                                                                                                                                                                                                                                                                                                                                                                                                                                                                                                               | 2.312634 | 2.823850 | 0.000000 |          |   |   |      |          |  |  |  |  |     |          |          |  |  |  |      |          |          |          |  |  |     |          |          |          |          |  |     |          |          |          |          |          |      |          |          |          |          |          |      |          |          |          |          |          |     |          |          |          |          |          |     |          |          |          |          |          |       |          |          |          |          |          |      |          |          |          |          |          |       |          |          |          |          |          |  |   |   |   |   |    |      |          |          |  |  |  |     |          |          |          |  |  |     |          |          |          |          |  |       |          |          |          |          |          |      |          |          |          |          |          |       |          |          |          |          |          |  |    |    |  |  |  |       |          |          |  |  |  |
| 10 Re                                                                                                                                | 2.972088                                                                                                                                                                                                                                                                                                                                                                                                                                                                                                                                                                                                                                                                                                                                                                                                                                                                                                                                                                                                                                                                                                                                                                                                                                                                                                                                                                                                                                                                                                                                                                                                                                                                                                                                                                                                                                                                                                                                                                                                                                                                                                                                                                                                                                                               | 2.440717 | 3.292651 | 2.355315 | 0.000000 |   |   |      |          |  |  |  |  |     |          |          |  |  |  |      |          |          |          |  |  |     |          |          |          |          |  |     |          |          |          |          |          |      |          |          |          |          |          |      |          |          |          |          |          |     |          |          |          |          |          |     |          |          |          |          |          |       |          |          |          |          |          |      |          |          |          |          |          |       |          |          |          |          |          |  |   |   |   |   |    |      |          |          |  |  |  |     |          |          |          |  |  |     |          |          |          |          |  |       |          |          |          |          |          |      |          |          |          |          |          |       |          |          |          |          |          |  |    |    |  |  |  |       |          |          |  |  |  |
| 11 B                                                                                                                                 | 2.216951                                                                                                                                                                                                                                                                                                                                                                                                                                                                                                                                                                                                                                                                                                                                                                                                                                                                                                                                                                                                                                                                                                                                                                                                                                                                                                                                                                                                                                                                                                                                                                                                                                                                                                                                                                                                                                                                                                                                                                                                                                                                                                                                                                                                                                                               | 3.610670 | 1.731855 | 3.055753 | 2.183199 |   |   |      |          |  |  |  |  |     |          |          |  |  |  |      |          |          |          |  |  |     |          |          |          |          |  |     |          |          |          |          |          |      |          |          |          |          |          |      |          |          |          |          |          |     |          |          |          |          |          |     |          |          |          |          |          |       |          |          |          |          |          |      |          |          |          |          |          |       |          |          |          |          |          |  |   |   |   |   |    |      |          |          |  |  |  |     |          |          |          |  |  |     |          |          |          |          |  |       |          |          |          |          |          |      |          |          |          |          |          |       |          |          |          |          |          |  |    |    |  |  |  |       |          |          |  |  |  |
| 12 B                                                                                                                                 | 3.229801                                                                                                                                                                                                                                                                                                                                                                                                                                                                                                                                                                                                                                                                                                                                                                                                                                                                                                                                                                                                                                                                                                                                                                                                                                                                                                                                                                                                                                                                                                                                                                                                                                                                                                                                                                                                                                                                                                                                                                                                                                                                                                                                                                                                                                                               | 3.447460 | 1.802655 | 1.789209 | 2.277051 |   |   |      |          |  |  |  |  |     |          |          |  |  |  |      |          |          |          |  |  |     |          |          |          |          |  |     |          |          |          |          |          |      |          |          |          |          |          |      |          |          |          |          |          |     |          |          |          |          |          |     |          |          |          |          |          |       |          |          |          |          |          |      |          |          |          |          |          |       |          |          |          |          |          |  |   |   |   |   |    |      |          |          |  |  |  |     |          |          |          |  |  |     |          |          |          |          |  |       |          |          |          |          |          |      |          |          |          |          |          |       |          |          |          |          |          |  |    |    |  |  |  |       |          |          |  |  |  |
|                                                                                                                                      | 11                                                                                                                                                                                                                                                                                                                                                                                                                                                                                                                                                                                                                                                                                                                                                                                                                                                                                                                                                                                                                                                                                                                                                                                                                                                                                                                                                                                                                                                                                                                                                                                                                                                                                                                                                                                                                                                                                                                                                                                                                                                                                                                                                                                                                                                                     | 12       |          |          |          |   |   |      |          |  |  |  |  |     |          |          |  |  |  |      |          |          |          |  |  |     |          |          |          |          |  |     |          |          |          |          |          |      |          |          |          |          |          |      |          |          |          |          |          |     |          |          |          |          |          |     |          |          |          |          |          |       |          |          |          |          |          |      |          |          |          |          |          |       |          |          |          |          |          |  |   |   |   |   |    |      |          |          |  |  |  |     |          |          |          |  |  |     |          |          |          |          |  |       |          |          |          |          |          |      |          |          |          |          |          |       |          |          |          |          |          |  |    |    |  |  |  |       |          |          |  |  |  |
| 12 B                                                                                                                                 | 1.764894                                                                                                                                                                                                                                                                                                                                                                                                                                                                                                                                                                                                                                                                                                                                                                                                                                                                                                                                                                                                                                                                                                                                                                                                                                                                                                                                                                                                                                                                                                                                                                                                                                                                                                                                                                                                                                                                                                                                                                                                                                                                                                                                                                                                                                                               | 0.000000 |          |          |          |   |   |      |          |  |  |  |  |     |          |          |  |  |  |      |          |          |          |  |  |     |          |          |          |          |  |     |          |          |          |          |          |      |          |          |          |          |          |      |          |          |          |          |          |     |          |          |          |          |          |     |          |          |          |          |          |       |          |          |          |          |          |      |          |          |          |          |          |       |          |          |          |          |          |  |   |   |   |   |    |      |          |          |  |  |  |     |          |          |          |  |  |     |          |          |          |          |  |       |          |          |          |          |          |      |          |          |          |          |          |       |          |          |          |          |          |  |    |    |  |  |  |       |          |          |  |  |  |
|  <p>2. -1044.82902040 +0.5 <math>C_s</math></p>   | <table border="1"> <thead> <tr> <th></th> <th>1</th> <th>2</th> <th>3</th> <th>4</th> <th>5</th> </tr> </thead> <tbody> <tr><td>1 Re</td><td>0.000000</td><td></td><td></td><td></td><td></td></tr> <tr><td>2 B</td><td>3.287891</td><td>0.000000</td><td></td><td></td><td></td></tr> <tr><td>3 Re</td><td>2.386660</td><td>2.194941</td><td>0.000000</td><td></td><td></td></tr> <tr><td>4 B</td><td>2.326971</td><td>1.787435</td><td>2.187673</td><td>0.000000</td><td></td></tr> <tr><td>5 B</td><td>3.557460</td><td>1.843914</td><td>3.379342</td><td>2.944086</td><td>0.000000</td></tr> <tr><td>6 B</td><td>3.287879</td><td>1.824829</td><td>2.194133</td><td>3.071794</td><td>1.841493</td></tr> <tr><td>7 B</td><td>3.205958</td><td>1.772394</td><td>3.392606</td><td>1.812722</td><td>1.786329</td></tr> <tr><td>8 B</td><td>2.325723</td><td>3.070273</td><td>2.187407</td><td>3.418625</td><td>2.937971</td></tr> <tr><td>9 B</td><td>2.192863</td><td>2.993545</td><td>3.524897</td><td>1.819109</td><td>3.068768</td></tr> <tr><td>10 B</td><td>3.205796</td><td>2.995214</td><td>3.394759</td><td>3.765645</td><td>1.786455</td></tr> <tr><td>11 B</td><td>2.193672</td><td>3.859607</td><td>3.527153</td><td>3.796450</td><td>3.067018</td></tr> <tr><td>12 Re</td><td>2.803486</td><td>3.310844</td><td>4.080608</td><td>3.212269</td><td>2.164153</td></tr> <tr> <td></td> <td>6</td> <td>7</td> <td>8</td> <td>9</td> <td>10</td> </tr> <tr><td>7 B</td><td>2.990251</td><td>0.000000</td><td></td><td></td><td></td></tr> <tr><td>8 B</td><td>1.786272</td><td>3.759564</td><td>0.000000</td><td></td><td></td></tr> <tr><td>9 B</td><td>3.857723</td><td>1.798991</td><td>3.792697</td><td>0.000000</td><td></td></tr> <tr><td>10 B</td><td>1.777344</td><td>3.181832</td><td>1.809277</td><td>3.681980</td><td>0.000000</td></tr> <tr><td>11 B</td><td>2.996676</td><td>3.680824</td><td>1.820064</td><td>3.243379</td><td>1.797026</td></tr> <tr><td>12 Re</td><td>3.311694</td><td>2.245543</td><td>3.209894</td><td>2.097119</td><td>2.246907</td></tr> <tr> <td></td> <td>11</td> <td>12</td> <td></td> <td></td> <td></td> </tr> <tr><td>12 Re</td><td>2.097215</td><td>0.000000</td><td></td><td></td><td></td></tr> </tbody> </table> |          | 1        | 2        | 3        | 4 | 5 | 1 Re | 0.000000 |  |  |  |  | 2 B | 3.287891 | 0.000000 |  |  |  | 3 Re | 2.386660 | 2.194941 | 0.000000 |  |  | 4 B | 2.326971 | 1.787435 | 2.187673 | 0.000000 |  | 5 B | 3.557460 | 1.843914 | 3.379342 | 2.944086 | 0.000000 | 6 B  | 3.287879 | 1.824829 | 2.194133 | 3.071794 | 1.841493 | 7 B  | 3.205958 | 1.772394 | 3.392606 | 1.812722 | 1.786329 | 8 B | 2.325723 | 3.070273 | 2.187407 | 3.418625 | 2.937971 | 9 B | 2.192863 | 2.993545 | 3.524897 | 1.819109 | 3.068768 | 10 B  | 3.205796 | 2.995214 | 3.394759 | 3.765645 | 1.786455 | 11 B | 2.193672 | 3.859607 | 3.527153 | 3.796450 | 3.067018 | 12 Re | 2.803486 | 3.310844 | 4.080608 | 3.212269 | 2.164153 |  | 6 | 7 | 8 | 9 | 10 | 7 B  | 2.990251 | 0.000000 |  |  |  | 8 B | 1.786272 | 3.759564 | 0.000000 |  |  | 9 B | 3.857723 | 1.798991 | 3.792697 | 0.000000 |  | 10 B  | 1.777344 | 3.181832 | 1.809277 | 3.681980 | 0.000000 | 11 B | 2.996676 | 3.680824 | 1.820064 | 3.243379 | 1.797026 | 12 Re | 3.311694 | 2.245543 | 3.209894 | 2.097119 | 2.246907 |  | 11 | 12 |  |  |  | 12 Re | 2.097215 | 0.000000 |  |  |  |
|                                                                                                                                      | 1                                                                                                                                                                                                                                                                                                                                                                                                                                                                                                                                                                                                                                                                                                                                                                                                                                                                                                                                                                                                                                                                                                                                                                                                                                                                                                                                                                                                                                                                                                                                                                                                                                                                                                                                                                                                                                                                                                                                                                                                                                                                                                                                                                                                                                                                      | 2        | 3        | 4        | 5        |   |   |      |          |  |  |  |  |     |          |          |  |  |  |      |          |          |          |  |  |     |          |          |          |          |  |     |          |          |          |          |          |      |          |          |          |          |          |      |          |          |          |          |          |     |          |          |          |          |          |     |          |          |          |          |          |       |          |          |          |          |          |      |          |          |          |          |          |       |          |          |          |          |          |  |   |   |   |   |    |      |          |          |  |  |  |     |          |          |          |  |  |     |          |          |          |          |  |       |          |          |          |          |          |      |          |          |          |          |          |       |          |          |          |          |          |  |    |    |  |  |  |       |          |          |  |  |  |
| 1 Re                                                                                                                                 | 0.000000                                                                                                                                                                                                                                                                                                                                                                                                                                                                                                                                                                                                                                                                                                                                                                                                                                                                                                                                                                                                                                                                                                                                                                                                                                                                                                                                                                                                                                                                                                                                                                                                                                                                                                                                                                                                                                                                                                                                                                                                                                                                                                                                                                                                                                                               |          |          |          |          |   |   |      |          |  |  |  |  |     |          |          |  |  |  |      |          |          |          |  |  |     |          |          |          |          |  |     |          |          |          |          |          |      |          |          |          |          |          |      |          |          |          |          |          |     |          |          |          |          |          |     |          |          |          |          |          |       |          |          |          |          |          |      |          |          |          |          |          |       |          |          |          |          |          |  |   |   |   |   |    |      |          |          |  |  |  |     |          |          |          |  |  |     |          |          |          |          |  |       |          |          |          |          |          |      |          |          |          |          |          |       |          |          |          |          |          |  |    |    |  |  |  |       |          |          |  |  |  |
| 2 B                                                                                                                                  | 3.287891                                                                                                                                                                                                                                                                                                                                                                                                                                                                                                                                                                                                                                                                                                                                                                                                                                                                                                                                                                                                                                                                                                                                                                                                                                                                                                                                                                                                                                                                                                                                                                                                                                                                                                                                                                                                                                                                                                                                                                                                                                                                                                                                                                                                                                                               | 0.000000 |          |          |          |   |   |      |          |  |  |  |  |     |          |          |  |  |  |      |          |          |          |  |  |     |          |          |          |          |  |     |          |          |          |          |          |      |          |          |          |          |          |      |          |          |          |          |          |     |          |          |          |          |          |     |          |          |          |          |          |       |          |          |          |          |          |      |          |          |          |          |          |       |          |          |          |          |          |  |   |   |   |   |    |      |          |          |  |  |  |     |          |          |          |  |  |     |          |          |          |          |  |       |          |          |          |          |          |      |          |          |          |          |          |       |          |          |          |          |          |  |    |    |  |  |  |       |          |          |  |  |  |
| 3 Re                                                                                                                                 | 2.386660                                                                                                                                                                                                                                                                                                                                                                                                                                                                                                                                                                                                                                                                                                                                                                                                                                                                                                                                                                                                                                                                                                                                                                                                                                                                                                                                                                                                                                                                                                                                                                                                                                                                                                                                                                                                                                                                                                                                                                                                                                                                                                                                                                                                                                                               | 2.194941 | 0.000000 |          |          |   |   |      |          |  |  |  |  |     |          |          |  |  |  |      |          |          |          |  |  |     |          |          |          |          |  |     |          |          |          |          |          |      |          |          |          |          |          |      |          |          |          |          |          |     |          |          |          |          |          |     |          |          |          |          |          |       |          |          |          |          |          |      |          |          |          |          |          |       |          |          |          |          |          |  |   |   |   |   |    |      |          |          |  |  |  |     |          |          |          |  |  |     |          |          |          |          |  |       |          |          |          |          |          |      |          |          |          |          |          |       |          |          |          |          |          |  |    |    |  |  |  |       |          |          |  |  |  |
| 4 B                                                                                                                                  | 2.326971                                                                                                                                                                                                                                                                                                                                                                                                                                                                                                                                                                                                                                                                                                                                                                                                                                                                                                                                                                                                                                                                                                                                                                                                                                                                                                                                                                                                                                                                                                                                                                                                                                                                                                                                                                                                                                                                                                                                                                                                                                                                                                                                                                                                                                                               | 1.787435 | 2.187673 | 0.000000 |          |   |   |      |          |  |  |  |  |     |          |          |  |  |  |      |          |          |          |  |  |     |          |          |          |          |  |     |          |          |          |          |          |      |          |          |          |          |          |      |          |          |          |          |          |     |          |          |          |          |          |     |          |          |          |          |          |       |          |          |          |          |          |      |          |          |          |          |          |       |          |          |          |          |          |  |   |   |   |   |    |      |          |          |  |  |  |     |          |          |          |  |  |     |          |          |          |          |  |       |          |          |          |          |          |      |          |          |          |          |          |       |          |          |          |          |          |  |    |    |  |  |  |       |          |          |  |  |  |
| 5 B                                                                                                                                  | 3.557460                                                                                                                                                                                                                                                                                                                                                                                                                                                                                                                                                                                                                                                                                                                                                                                                                                                                                                                                                                                                                                                                                                                                                                                                                                                                                                                                                                                                                                                                                                                                                                                                                                                                                                                                                                                                                                                                                                                                                                                                                                                                                                                                                                                                                                                               | 1.843914 | 3.379342 | 2.944086 | 0.000000 |   |   |      |          |  |  |  |  |     |          |          |  |  |  |      |          |          |          |  |  |     |          |          |          |          |  |     |          |          |          |          |          |      |          |          |          |          |          |      |          |          |          |          |          |     |          |          |          |          |          |     |          |          |          |          |          |       |          |          |          |          |          |      |          |          |          |          |          |       |          |          |          |          |          |  |   |   |   |   |    |      |          |          |  |  |  |     |          |          |          |  |  |     |          |          |          |          |  |       |          |          |          |          |          |      |          |          |          |          |          |       |          |          |          |          |          |  |    |    |  |  |  |       |          |          |  |  |  |
| 6 B                                                                                                                                  | 3.287879                                                                                                                                                                                                                                                                                                                                                                                                                                                                                                                                                                                                                                                                                                                                                                                                                                                                                                                                                                                                                                                                                                                                                                                                                                                                                                                                                                                                                                                                                                                                                                                                                                                                                                                                                                                                                                                                                                                                                                                                                                                                                                                                                                                                                                                               | 1.824829 | 2.194133 | 3.071794 | 1.841493 |   |   |      |          |  |  |  |  |     |          |          |  |  |  |      |          |          |          |  |  |     |          |          |          |          |  |     |          |          |          |          |          |      |          |          |          |          |          |      |          |          |          |          |          |     |          |          |          |          |          |     |          |          |          |          |          |       |          |          |          |          |          |      |          |          |          |          |          |       |          |          |          |          |          |  |   |   |   |   |    |      |          |          |  |  |  |     |          |          |          |  |  |     |          |          |          |          |  |       |          |          |          |          |          |      |          |          |          |          |          |       |          |          |          |          |          |  |    |    |  |  |  |       |          |          |  |  |  |
| 7 B                                                                                                                                  | 3.205958                                                                                                                                                                                                                                                                                                                                                                                                                                                                                                                                                                                                                                                                                                                                                                                                                                                                                                                                                                                                                                                                                                                                                                                                                                                                                                                                                                                                                                                                                                                                                                                                                                                                                                                                                                                                                                                                                                                                                                                                                                                                                                                                                                                                                                                               | 1.772394 | 3.392606 | 1.812722 | 1.786329 |   |   |      |          |  |  |  |  |     |          |          |  |  |  |      |          |          |          |  |  |     |          |          |          |          |  |     |          |          |          |          |          |      |          |          |          |          |          |      |          |          |          |          |          |     |          |          |          |          |          |     |          |          |          |          |          |       |          |          |          |          |          |      |          |          |          |          |          |       |          |          |          |          |          |  |   |   |   |   |    |      |          |          |  |  |  |     |          |          |          |  |  |     |          |          |          |          |  |       |          |          |          |          |          |      |          |          |          |          |          |       |          |          |          |          |          |  |    |    |  |  |  |       |          |          |  |  |  |
| 8 B                                                                                                                                  | 2.325723                                                                                                                                                                                                                                                                                                                                                                                                                                                                                                                                                                                                                                                                                                                                                                                                                                                                                                                                                                                                                                                                                                                                                                                                                                                                                                                                                                                                                                                                                                                                                                                                                                                                                                                                                                                                                                                                                                                                                                                                                                                                                                                                                                                                                                                               | 3.070273 | 2.187407 | 3.418625 | 2.937971 |   |   |      |          |  |  |  |  |     |          |          |  |  |  |      |          |          |          |  |  |     |          |          |          |          |  |     |          |          |          |          |          |      |          |          |          |          |          |      |          |          |          |          |          |     |          |          |          |          |          |     |          |          |          |          |          |       |          |          |          |          |          |      |          |          |          |          |          |       |          |          |          |          |          |  |   |   |   |   |    |      |          |          |  |  |  |     |          |          |          |  |  |     |          |          |          |          |  |       |          |          |          |          |          |      |          |          |          |          |          |       |          |          |          |          |          |  |    |    |  |  |  |       |          |          |  |  |  |
| 9 B                                                                                                                                  | 2.192863                                                                                                                                                                                                                                                                                                                                                                                                                                                                                                                                                                                                                                                                                                                                                                                                                                                                                                                                                                                                                                                                                                                                                                                                                                                                                                                                                                                                                                                                                                                                                                                                                                                                                                                                                                                                                                                                                                                                                                                                                                                                                                                                                                                                                                                               | 2.993545 | 3.524897 | 1.819109 | 3.068768 |   |   |      |          |  |  |  |  |     |          |          |  |  |  |      |          |          |          |  |  |     |          |          |          |          |  |     |          |          |          |          |          |      |          |          |          |          |          |      |          |          |          |          |          |     |          |          |          |          |          |     |          |          |          |          |          |       |          |          |          |          |          |      |          |          |          |          |          |       |          |          |          |          |          |  |   |   |   |   |    |      |          |          |  |  |  |     |          |          |          |  |  |     |          |          |          |          |  |       |          |          |          |          |          |      |          |          |          |          |          |       |          |          |          |          |          |  |    |    |  |  |  |       |          |          |  |  |  |
| 10 B                                                                                                                                 | 3.205796                                                                                                                                                                                                                                                                                                                                                                                                                                                                                                                                                                                                                                                                                                                                                                                                                                                                                                                                                                                                                                                                                                                                                                                                                                                                                                                                                                                                                                                                                                                                                                                                                                                                                                                                                                                                                                                                                                                                                                                                                                                                                                                                                                                                                                                               | 2.995214 | 3.394759 | 3.765645 | 1.786455 |   |   |      |          |  |  |  |  |     |          |          |  |  |  |      |          |          |          |  |  |     |          |          |          |          |  |     |          |          |          |          |          |      |          |          |          |          |          |      |          |          |          |          |          |     |          |          |          |          |          |     |          |          |          |          |          |       |          |          |          |          |          |      |          |          |          |          |          |       |          |          |          |          |          |  |   |   |   |   |    |      |          |          |  |  |  |     |          |          |          |  |  |     |          |          |          |          |  |       |          |          |          |          |          |      |          |          |          |          |          |       |          |          |          |          |          |  |    |    |  |  |  |       |          |          |  |  |  |
| 11 B                                                                                                                                 | 2.193672                                                                                                                                                                                                                                                                                                                                                                                                                                                                                                                                                                                                                                                                                                                                                                                                                                                                                                                                                                                                                                                                                                                                                                                                                                                                                                                                                                                                                                                                                                                                                                                                                                                                                                                                                                                                                                                                                                                                                                                                                                                                                                                                                                                                                                                               | 3.859607 | 3.527153 | 3.796450 | 3.067018 |   |   |      |          |  |  |  |  |     |          |          |  |  |  |      |          |          |          |  |  |     |          |          |          |          |  |     |          |          |          |          |          |      |          |          |          |          |          |      |          |          |          |          |          |     |          |          |          |          |          |     |          |          |          |          |          |       |          |          |          |          |          |      |          |          |          |          |          |       |          |          |          |          |          |  |   |   |   |   |    |      |          |          |  |  |  |     |          |          |          |  |  |     |          |          |          |          |  |       |          |          |          |          |          |      |          |          |          |          |          |       |          |          |          |          |          |  |    |    |  |  |  |       |          |          |  |  |  |
| 12 Re                                                                                                                                | 2.803486                                                                                                                                                                                                                                                                                                                                                                                                                                                                                                                                                                                                                                                                                                                                                                                                                                                                                                                                                                                                                                                                                                                                                                                                                                                                                                                                                                                                                                                                                                                                                                                                                                                                                                                                                                                                                                                                                                                                                                                                                                                                                                                                                                                                                                                               | 3.310844 | 4.080608 | 3.212269 | 2.164153 |   |   |      |          |  |  |  |  |     |          |          |  |  |  |      |          |          |          |  |  |     |          |          |          |          |  |     |          |          |          |          |          |      |          |          |          |          |          |      |          |          |          |          |          |     |          |          |          |          |          |     |          |          |          |          |          |       |          |          |          |          |          |      |          |          |          |          |          |       |          |          |          |          |          |  |   |   |   |   |    |      |          |          |  |  |  |     |          |          |          |  |  |     |          |          |          |          |  |       |          |          |          |          |          |      |          |          |          |          |          |       |          |          |          |          |          |  |    |    |  |  |  |       |          |          |  |  |  |
|                                                                                                                                      | 6                                                                                                                                                                                                                                                                                                                                                                                                                                                                                                                                                                                                                                                                                                                                                                                                                                                                                                                                                                                                                                                                                                                                                                                                                                                                                                                                                                                                                                                                                                                                                                                                                                                                                                                                                                                                                                                                                                                                                                                                                                                                                                                                                                                                                                                                      | 7        | 8        | 9        | 10       |   |   |      |          |  |  |  |  |     |          |          |  |  |  |      |          |          |          |  |  |     |          |          |          |          |  |     |          |          |          |          |          |      |          |          |          |          |          |      |          |          |          |          |          |     |          |          |          |          |          |     |          |          |          |          |          |       |          |          |          |          |          |      |          |          |          |          |          |       |          |          |          |          |          |  |   |   |   |   |    |      |          |          |  |  |  |     |          |          |          |  |  |     |          |          |          |          |  |       |          |          |          |          |          |      |          |          |          |          |          |       |          |          |          |          |          |  |    |    |  |  |  |       |          |          |  |  |  |
| 7 B                                                                                                                                  | 2.990251                                                                                                                                                                                                                                                                                                                                                                                                                                                                                                                                                                                                                                                                                                                                                                                                                                                                                                                                                                                                                                                                                                                                                                                                                                                                                                                                                                                                                                                                                                                                                                                                                                                                                                                                                                                                                                                                                                                                                                                                                                                                                                                                                                                                                                                               | 0.000000 |          |          |          |   |   |      |          |  |  |  |  |     |          |          |  |  |  |      |          |          |          |  |  |     |          |          |          |          |  |     |          |          |          |          |          |      |          |          |          |          |          |      |          |          |          |          |          |     |          |          |          |          |          |     |          |          |          |          |          |       |          |          |          |          |          |      |          |          |          |          |          |       |          |          |          |          |          |  |   |   |   |   |    |      |          |          |  |  |  |     |          |          |          |  |  |     |          |          |          |          |  |       |          |          |          |          |          |      |          |          |          |          |          |       |          |          |          |          |          |  |    |    |  |  |  |       |          |          |  |  |  |
| 8 B                                                                                                                                  | 1.786272                                                                                                                                                                                                                                                                                                                                                                                                                                                                                                                                                                                                                                                                                                                                                                                                                                                                                                                                                                                                                                                                                                                                                                                                                                                                                                                                                                                                                                                                                                                                                                                                                                                                                                                                                                                                                                                                                                                                                                                                                                                                                                                                                                                                                                                               | 3.759564 | 0.000000 |          |          |   |   |      |          |  |  |  |  |     |          |          |  |  |  |      |          |          |          |  |  |     |          |          |          |          |  |     |          |          |          |          |          |      |          |          |          |          |          |      |          |          |          |          |          |     |          |          |          |          |          |     |          |          |          |          |          |       |          |          |          |          |          |      |          |          |          |          |          |       |          |          |          |          |          |  |   |   |   |   |    |      |          |          |  |  |  |     |          |          |          |  |  |     |          |          |          |          |  |       |          |          |          |          |          |      |          |          |          |          |          |       |          |          |          |          |          |  |    |    |  |  |  |       |          |          |  |  |  |
| 9 B                                                                                                                                  | 3.857723                                                                                                                                                                                                                                                                                                                                                                                                                                                                                                                                                                                                                                                                                                                                                                                                                                                                                                                                                                                                                                                                                                                                                                                                                                                                                                                                                                                                                                                                                                                                                                                                                                                                                                                                                                                                                                                                                                                                                                                                                                                                                                                                                                                                                                                               | 1.798991 | 3.792697 | 0.000000 |          |   |   |      |          |  |  |  |  |     |          |          |  |  |  |      |          |          |          |  |  |     |          |          |          |          |  |     |          |          |          |          |          |      |          |          |          |          |          |      |          |          |          |          |          |     |          |          |          |          |          |     |          |          |          |          |          |       |          |          |          |          |          |      |          |          |          |          |          |       |          |          |          |          |          |  |   |   |   |   |    |      |          |          |  |  |  |     |          |          |          |  |  |     |          |          |          |          |  |       |          |          |          |          |          |      |          |          |          |          |          |       |          |          |          |          |          |  |    |    |  |  |  |       |          |          |  |  |  |
| 10 B                                                                                                                                 | 1.777344                                                                                                                                                                                                                                                                                                                                                                                                                                                                                                                                                                                                                                                                                                                                                                                                                                                                                                                                                                                                                                                                                                                                                                                                                                                                                                                                                                                                                                                                                                                                                                                                                                                                                                                                                                                                                                                                                                                                                                                                                                                                                                                                                                                                                                                               | 3.181832 | 1.809277 | 3.681980 | 0.000000 |   |   |      |          |  |  |  |  |     |          |          |  |  |  |      |          |          |          |  |  |     |          |          |          |          |  |     |          |          |          |          |          |      |          |          |          |          |          |      |          |          |          |          |          |     |          |          |          |          |          |     |          |          |          |          |          |       |          |          |          |          |          |      |          |          |          |          |          |       |          |          |          |          |          |  |   |   |   |   |    |      |          |          |  |  |  |     |          |          |          |  |  |     |          |          |          |          |  |       |          |          |          |          |          |      |          |          |          |          |          |       |          |          |          |          |          |  |    |    |  |  |  |       |          |          |  |  |  |
| 11 B                                                                                                                                 | 2.996676                                                                                                                                                                                                                                                                                                                                                                                                                                                                                                                                                                                                                                                                                                                                                                                                                                                                                                                                                                                                                                                                                                                                                                                                                                                                                                                                                                                                                                                                                                                                                                                                                                                                                                                                                                                                                                                                                                                                                                                                                                                                                                                                                                                                                                                               | 3.680824 | 1.820064 | 3.243379 | 1.797026 |   |   |      |          |  |  |  |  |     |          |          |  |  |  |      |          |          |          |  |  |     |          |          |          |          |  |     |          |          |          |          |          |      |          |          |          |          |          |      |          |          |          |          |          |     |          |          |          |          |          |     |          |          |          |          |          |       |          |          |          |          |          |      |          |          |          |          |          |       |          |          |          |          |          |  |   |   |   |   |    |      |          |          |  |  |  |     |          |          |          |  |  |     |          |          |          |          |  |       |          |          |          |          |          |      |          |          |          |          |          |       |          |          |          |          |          |  |    |    |  |  |  |       |          |          |  |  |  |
| 12 Re                                                                                                                                | 3.311694                                                                                                                                                                                                                                                                                                                                                                                                                                                                                                                                                                                                                                                                                                                                                                                                                                                                                                                                                                                                                                                                                                                                                                                                                                                                                                                                                                                                                                                                                                                                                                                                                                                                                                                                                                                                                                                                                                                                                                                                                                                                                                                                                                                                                                                               | 2.245543 | 3.209894 | 2.097119 | 2.246907 |   |   |      |          |  |  |  |  |     |          |          |  |  |  |      |          |          |          |  |  |     |          |          |          |          |  |     |          |          |          |          |          |      |          |          |          |          |          |      |          |          |          |          |          |     |          |          |          |          |          |     |          |          |          |          |          |       |          |          |          |          |          |      |          |          |          |          |          |       |          |          |          |          |          |  |   |   |   |   |    |      |          |          |  |  |  |     |          |          |          |  |  |     |          |          |          |          |  |       |          |          |          |          |          |      |          |          |          |          |          |       |          |          |          |          |          |  |    |    |  |  |  |       |          |          |  |  |  |
|                                                                                                                                      | 11                                                                                                                                                                                                                                                                                                                                                                                                                                                                                                                                                                                                                                                                                                                                                                                                                                                                                                                                                                                                                                                                                                                                                                                                                                                                                                                                                                                                                                                                                                                                                                                                                                                                                                                                                                                                                                                                                                                                                                                                                                                                                                                                                                                                                                                                     | 12       |          |          |          |   |   |      |          |  |  |  |  |     |          |          |  |  |  |      |          |          |          |  |  |     |          |          |          |          |  |     |          |          |          |          |          |      |          |          |          |          |          |      |          |          |          |          |          |     |          |          |          |          |          |     |          |          |          |          |          |       |          |          |          |          |          |      |          |          |          |          |          |       |          |          |          |          |          |  |   |   |   |   |    |      |          |          |  |  |  |     |          |          |          |  |  |     |          |          |          |          |  |       |          |          |          |          |          |      |          |          |          |          |          |       |          |          |          |          |          |  |    |    |  |  |  |       |          |          |  |  |  |
| 12 Re                                                                                                                                | 2.097215                                                                                                                                                                                                                                                                                                                                                                                                                                                                                                                                                                                                                                                                                                                                                                                                                                                                                                                                                                                                                                                                                                                                                                                                                                                                                                                                                                                                                                                                                                                                                                                                                                                                                                                                                                                                                                                                                                                                                                                                                                                                                                                                                                                                                                                               | 0.000000 |          |          |          |   |   |      |          |  |  |  |  |     |          |          |  |  |  |      |          |          |          |  |  |     |          |          |          |          |  |     |          |          |          |          |          |      |          |          |          |          |          |      |          |          |          |          |          |     |          |          |          |          |          |     |          |          |          |          |          |       |          |          |          |          |          |      |          |          |          |          |          |       |          |          |          |          |          |  |   |   |   |   |    |      |          |          |  |  |  |     |          |          |          |  |  |     |          |          |          |          |  |       |          |          |          |          |          |      |          |          |          |          |          |       |          |          |          |          |          |  |    |    |  |  |  |       |          |          |  |  |  |

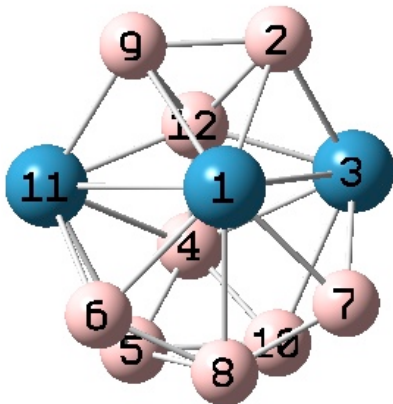

3. -1044.80921500 +13.0 C<sub>s</sub>

|                                        | 1        | 2        | 3        | 4        | 5        |
|----------------------------------------|----------|----------|----------|----------|----------|
| 1 Re                                   | 0.000000 |          |          |          |          |
| 2 B                                    | 2.248722 | 0.000000 |          |          |          |
| 3 Re                                   | 2.794091 | 2.196339 | 0.000000 |          |          |
| 4 B                                    | 3.209418 | 3.385197 | 2.346718 | 0.000000 |          |
| 5 B                                    | 3.111275 | 4.323610 | 3.488695 | 1.765132 | 0.000000 |
| 6 B                                    | 2.255266 | 4.106047 | 4.038535 | 2.993773 | 1.751842 |
| 7 B                                    | 2.254035 | 3.362706 | 2.139257 | 2.996633 | 2.932073 |
| 8 B                                    | 2.392680 | 4.167688 | 3.318882 | 2.852393 | 1.783002 |
| 9 B                                    | 2.252155 | 1.809683 | 3.424527 | 3.384099 | 3.930357 |
| 10 B                                   | 3.107767 | 3.929187 | 2.307999 | 1.765094 | 1.791832 |
| 11 Re                                  | 2.800279 | 3.427947 | 3.821172 | 2.351336 | 2.312137 |
| 12 B                                   | 2.391614 | 1.834905 | 2.034889 | 1.720014 | 2.868728 |
|                                        | 6        | 7        | 8        | 9        | 10       |
| 7 B                                    | 3.078774 | 0.000000 |          |          |          |
| 8 B                                    | 1.725362 | 1.724124 | 0.000000 |          |          |
| 9 B                                    | 3.361013 | 4.109475 | 4.168857 | 0.000000 |          |
| 10 B                                   | 2.928189 | 1.751886 | 1.780042 | 4.321795 | 0.000000 |
| 11 Re                                  | 2.138668 | 4.045936 | 3.323832 | 2.196383 | 3.492223 |
| 12 B                                   | 3.163791 | 3.169996 | 3.406149 | 1.830494 | 2.869636 |
|                                        | 11       | 12       |          |          |          |
| 12 B                                   | 2.032989 | 0.000000 |          |          |          |
| Bridge B2-H-B9 B2-H 1.3329 B9-H 1.3281 |          |          |          |          |          |

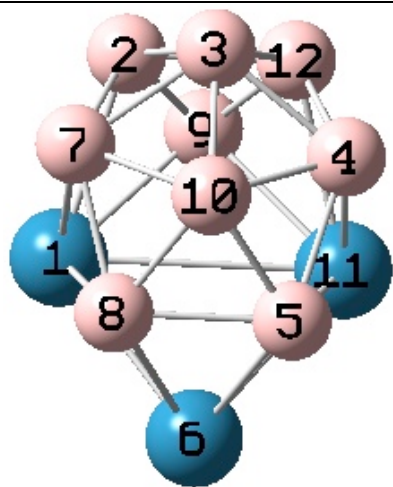

4. -1044.80693440 +14.4 C<sub>s</sub>

|       | 1        | 2        | 3        | 4        | 5        |
|-------|----------|----------|----------|----------|----------|
| 1 Re  | 0.000000 |          |          |          |          |
| 2 B   | 2.298677 | 0.000000 |          |          |          |
| 3 B   | 3.387305 | 1.744452 | 0.000000 |          |          |
| 4 B   | 3.664112 | 2.835084 | 1.768784 | 0.000000 |          |
| 5 B   | 3.275470 | 3.616424 | 2.938121 | 1.814509 | 0.000000 |
| 6 Re  | 2.414418 | 4.059030 | 4.312945 | 3.565531 | 2.215251 |
| 7 B   | 2.265189 | 1.754548 | 1.771314 | 2.822289 | 2.912242 |
| 8 B   | 2.298923 | 3.136733 | 2.945355 | 2.925555 | 1.854636 |
| 9 B   | 2.181169 | 1.779022 | 2.981499 | 3.076424 | 3.668555 |
| 10 B  | 3.375071 | 2.919144 | 1.764622 | 1.808865 | 1.749517 |
| 11 Re | 2.967309 | 3.253331 | 3.411100 | 2.286884 | 2.343163 |
| 12 B  | 3.248608 | 1.766552 | 1.747840 | 1.760711 | 3.151148 |
|       | 6        | 7        | 8        | 9        | 10       |
| 6 Re  | 0.000000 |          |          |          |          |
| 7 B   | 3.571776 | 0.000000 |          |          |          |
| 8 B   | 2.223809 | 1.810799 | 0.000000 |          |          |
| 9 B   | 3.507090 | 3.074485 | 3.667770 | 0.000000 |          |
| 10 B  | 3.455605 | 1.801131 | 1.756366 | 3.810609 | 0.000000 |
| 11 Re | 2.434584 | 3.699133 | 3.324517 | 2.188422 | 3.415269 |
| 12 B  | 4.071837 | 2.848147 | 3.639051 | 1.790946 | 2.933054 |
|       | 11       | 12       |          |          |          |
| 12 B  | 2.317433 | 0.000000 |          |          |          |

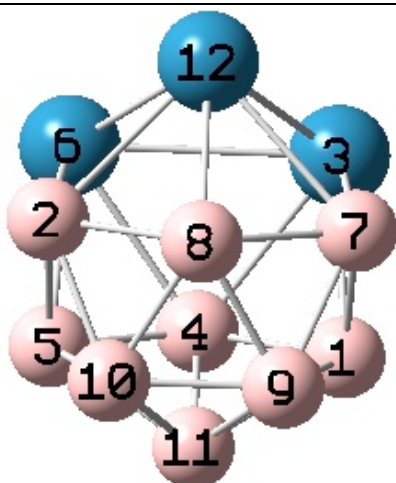

5. -1044.80573880 +15.2  $C_s$

|       | 1        | 2        | 3        | 4        | 5        |
|-------|----------|----------|----------|----------|----------|
| 1 B   | 0.000000 |          |          |          |          |
| 2 B   | 3.528217 | 0.000000 |          |          |          |
| 3 Re  | 2.200849 | 3.689331 | 0.000000 |          |          |
| 4 B   | 1.850500 | 3.045372 | 2.282399 | 0.000000 |          |
| 5 B   | 2.951830 | 1.817845 | 3.582477 | 1.850823 | 0.000000 |
| 6 Re  | 3.582198 | 2.287113 | 2.706110 | 2.282245 | 2.201498 |
| 7 B   | 1.818215 | 3.097817 | 2.286069 | 3.045489 | 3.528542 |
| 8 B   | 2.891131 | 1.814598 | 3.489051 | 3.444915 | 2.890653 |
| 9 B   | 1.781312 | 2.924577 | 3.464693 | 2.926640 | 2.886911 |
| 10 B  | 2.887064 | 1.771373 | 4.091354 | 2.926654 | 1.780992 |
| 11 B  | 1.781160 | 2.911786 | 3.463365 | 1.787785 | 1.781140 |
| 12 Re | 3.399516 | 2.286897 | 2.412388 | 3.388626 | 3.398385 |
|       | 6        | 7        | 8        | 9        | 10       |
| 6 Re  | 0.000000 |          |          |          |          |
| 7 B   | 3.689430 | 0.000000 |          |          |          |
| 8 B   | 3.489290 | 1.815498 | 0.000000 |          |          |
| 9 B   | 4.091385 | 1.771532 | 1.776025 | 0.000000 |          |
| 10 B  | 3.465481 | 2.925394 | 1.776199 | 1.748811 | 0.000000 |
| 11 B  | 3.463558 | 2.912225 | 2.855895 | 1.758844 | 1.758593 |
| 12 Re | 2.411093 | 2.288519 | 2.227739 | 3.434874 | 3.434660 |
|       | 11       | 12       |          |          |          |
| 12 Re | 3.938225 | 0.000000 |          |          |          |

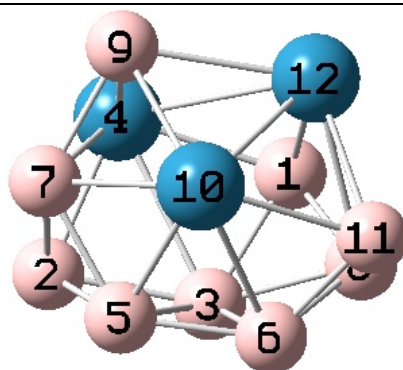

6. -1044.80530810 +15.4  $C_1$

|       | 1        | 2        | 3        | 4        | 5        |
|-------|----------|----------|----------|----------|----------|
| 1 B   | 0.000000 |          |          |          |          |
| 2 B   | 3.098658 | 0.000000 |          |          |          |
| 3 B   | 1.865100 | 1.884464 | 0.000000 |          |          |
| 4 Re  | 2.094423 | 2.032625 | 2.412730 | 0.000000 |          |
| 5 B   | 3.399759 | 1.762671 | 1.923732 | 3.031592 | 0.000000 |
| 6 B   | 2.971054 | 3.055059 | 1.850140 | 3.677193 | 1.737830 |
| 7 B   | 3.607924 | 1.823948 | 2.863459 | 2.279601 | 1.783012 |
| 8 B   | 1.767983 | 3.605275 | 1.877693 | 3.376938 | 3.015924 |
| 9 B   | 3.301848 | 3.108225 | 3.512186 | 2.134801 | 3.100791 |
| 10 Re | 3.758269 | 3.476958 | 3.278649 | 3.557752 | 2.225965 |
| 11 B  | 3.123786 | 4.287894 | 3.028096 | 4.147110 | 3.089602 |
| 12 Re | 2.221242 | 3.957731 | 3.131954 | 2.824441 | 3.548956 |
|       | 6        | 7        | 8        | 9        | 10       |
| 6 B   | 0.000000 |          |          |          |          |
| 7 B   | 3.144771 | 0.000000 |          |          |          |
| 8 B   | 1.732864 | 3.893815 | 0.000000 |          |          |
| 9 B   | 3.739444 | 1.777347 | 3.851229 | 0.000000 |          |
| 10 Re | 2.320177 | 2.237030 | 3.174660 | 2.281101 | 0.000000 |
| 11 B  | 1.733225 | 3.852552 | 1.739233 | 3.656491 | 2.173835 |
| 12 Re | 3.033456 | 3.333078 | 2.309694 | 2.269201 | 2.478308 |
|       | 11       | 12       |          |          |          |
| 12 Re | 2.166354 | 0.000000 |          |          |          |

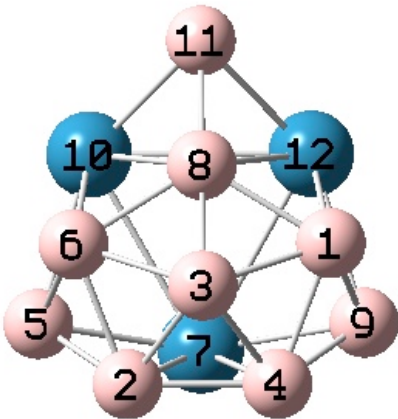

7. -1044.80314790 +16.8 C<sub>s</sub>

|                 | 1        | 2        | 3        | 4        | 5        |
|-----------------|----------|----------|----------|----------|----------|
| 1 B             | 0.000000 |          |          |          |          |
| 2 B             | 2.938977 | 0.000000 |          |          |          |
| 3 B             | 1.795090 | 1.790845 | 0.000000 |          |          |
| 4 B             | 1.791464 | 1.778934 | 1.790868 | 0.000000 |          |
| 5 B             | 3.853769 | 1.733947 | 2.974429 | 3.144996 | 0.000000 |
| 6 B             | 3.052143 | 1.788395 | 1.795580 | 2.937554 | 1.740867 |
| 7 Re            | 3.049322 | 2.307770 | 3.215847 | 2.309279 | 2.159692 |
| 8 B             | 1.793019 | 2.737993 | 1.717184 | 2.738120 | 2.971154 |
| 9 B             | 1.740375 | 3.141237 | 2.969977 | 1.731276 | 3.865934 |
| 10 Re           | 3.662595 | 3.301032 | 3.508966 | 3.947928 | 2.189450 |
| 11 B            | 3.006414 | 4.223136 | 3.401356 | 4.222397 | 3.886676 |
| 12 Re           | 2.319104 | 3.945344 | 3.507981 | 3.300796 | 3.867919 |
|                 | 6        | 7        | 8        | 9        | 10       |
| 7 Re            | 3.044951 | 0.000000 |          |          |          |
| 8 B             | 1.794896 | 3.080039 | 0.000000 |          |          |
| 9 B             | 3.847954 | 2.160798 | 2.966282 | 0.000000 |          |
| 10 Re           | 2.317515 | 2.678446 | 2.315416 | 3.867908 | 0.000000 |
| 11 B            | 3.010641 | 3.897065 | 1.686834 | 3.880424 | 2.166456 |
| 12 Re           | 3.659680 | 2.677261 | 2.313786 | 2.187998 | 2.630736 |
|                 | 11       | 12       |          |          |          |
| 12 Re           | 2.162081 | 0.000000 |          |          |          |
| bridge B8-H-B11 | B8-H     | 1.2645   | B11-H1   | 4.367    |          |

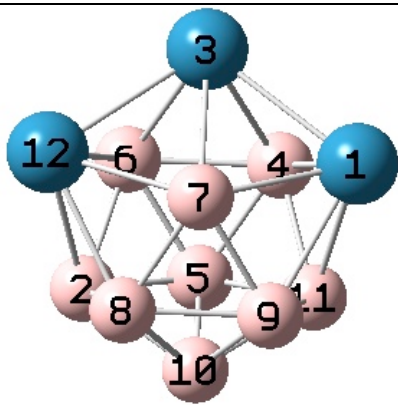

8. -1044.78351300 +29.1 C<sub>s</sub>

|       | 1        | 2        | 3        | 4        | 5        |
|-------|----------|----------|----------|----------|----------|
| 1 Re  | 0.000000 |          |          |          |          |
| 2 B   | 4.026449 | 0.000000 |          |          |          |
| 3 Re  | 2.433273 | 3.469282 | 0.000000 |          |          |
| 4 B   | 2.266861 | 2.946967 | 2.232055 | 0.000000 |          |
| 5 B   | 3.479236 | 1.777871 | 3.422512 | 1.782529 | 0.000000 |
| 6 B   | 3.526544 | 1.806481 | 2.232016 | 1.892239 | 1.782499 |
| 7 B   | 2.162783 | 2.955580 | 2.344481 | 3.073618 | 3.477824 |
| 8 B   | 3.448800 | 1.761092 | 3.515846 | 3.486409 | 2.887020 |
| 9 B   | 2.193355 | 2.891884 | 3.515796 | 2.946068 | 2.886977 |
| 10 B  | 3.454228 | 1.759241 | 4.037761 | 2.918526 | 1.794545 |
| 11 B  | 2.272228 | 2.864966 | 3.469335 | 1.806471 | 1.777872 |
| 12 Re | 3.856819 | 2.272137 | 2.433330 | 3.526623 | 3.479221 |
|       | 6        | 7        | 8        | 9        | 10       |
| 6 B   | 0.000000 |          |          |          |          |
| 7 B   | 3.073608 | 0.000000 |          |          |          |
| 8 B   | 2.946158 | 1.824172 | 0.000000 |          |          |
| 9 B   | 3.486342 | 1.824163 | 1.836570 | 0.000000 |          |
| 10 B  | 2.918542 | 2.908640 | 1.761227 | 1.761192 | 0.000000 |
| 11 B  | 2.946947 | 2.955629 | 2.891921 | 1.761060 | 1.759184 |
| 12 Re | 2.266910 | 2.162806 | 2.193381 | 3.448789 | 3.454235 |
|       | 11       | 12       |          |          |          |
| 12 Re | 4.026493 | 0.000000 |          |          |          |

Table S8C. Energy ranking for all of the Cp<sub>3</sub>Re<sub>3</sub>B<sub>9</sub>H<sub>9</sub> optimized structures after B3LYP/6-31G(d) optimizations:

| No. | Structure                  | Final energy (a.u.) | ΔE (kcal/mol) |
|-----|----------------------------|---------------------|---------------|
| 1   | 12v-03-AnticubeOh 18       | -1044.5079970       | 0.00          |
| 2   | 12v-03-AnticubeOh 6_r-113  | -1044.5078636       | 0.08          |
| 3   | 12v-03-AnticubeOh 5        | -1044.5006400       | 4.62          |
| 4   | 12v-02-CubeOh 2            | -1044.4904192       | 11.03         |
| 5   | 12v-01-Icos 1              | -1044.4904184       | 11.03         |
| 6   | 12v-01-Icos 3              | -1044.4898355       | 11.40         |
| 7   | 12v-01-Icos 2              | -1044.4898272       | 11.40         |
| 8   | 12v-03-AnticubeOh 3_r-72   | -1044.4897114       | 11.47         |
| 9   | 12v-03-AnticubeOh 14       | -1044.4711818       | 23.10         |
| 10  | 12v-03-AnticubeOh 2        | -1044.4709453       | 23.25         |
| 11  | 12v-03-AnticubeOh 17       | -1044.4645688       | 27.25         |
| 12  | 12v-03-AnticubeOh 4        | -1044.4640333       | 27.59         |
| 13  | 12v-02-CubeOh 12           | -1044.4590480       | 30.72         |
| 14  | 12v-02-CubeOh 3            | -1044.4590467       | 30.72         |
| 15  | 12v-02-CubeOh 11           | -1044.4590449       | 30.72         |
| 16  | 12v-01-Icos 4              | -1044.4531745       | 34.40         |
| 17  | 12v-02-CubeOh 14           | -1044.4524918       | 34.83         |
| 18  | 12v-02-CubeOh 1            | -1044.4516855       | 35.34         |
| 19  | 12v-03-AnticubeOh 13       | -1044.4496195       | 36.63         |
| 20  | 12v-03-AnticubeOh 10       | -1044.4486319       | 37.25         |
| 21  | 12v-02-CubeOh 6            | -1044.4429776       | 40.80         |
| 22  | 12v-03-AnticubeOh 15       | -1044.4427722       | 40.93         |
| 23  | 12v-02-CubeOh 9            | -1044.4414964       | 41.73         |
| 24  | 12v-03-AnticubeOh 7        | -1044.4414934       | 41.73         |
| 25  | 12v-02-CubeOh 13           | -1044.4392336       | 43.15         |
| 26  | 12v-02-CubeOh 8            | -1044.4392320       | 43.15         |
| 27  | 12v-02-CubeOh 10           | -1044.4392288       | 43.15         |
| 28  | 12v-03-AnticubeOh 8        | -1044.4359102       | 45.24         |
| 29  | 12v-03-AnticubeOh 6_i-113  | -1044.4325566       | 47.34         |
| 30  | 12v-02-CubeOh 5            | -1044.4311657       | 48.21         |
| 31  | 12v-03-AnticubeOh 11       | -1044.4260311       | 51.44         |
| 32  | 12v-03-AnticubeOh 20_i-14  | -1044.4245844       | 52.34         |
| 33  | 12v-03-AnticubeOh 20_r-14  | -1044.4245408       | 52.37         |
| 34  | 12v-02-CubeOh 4            | -1044.4226496       | 53.56         |
| 35  | 12v-02-CubeOh 7            | -1044.4119056       | 60.30         |
| 36  | 12v-02-CubeOh 15           | -1044.4077786       | 62.89         |
| 37  | 12v-03-AnticubeOh 12_r-918 | -1044.3946364       | 71.14         |
| 38  | 12v-03-AnticubeOh 1        | -1044.3919234       | 72.84         |
| 39  | 12v-03-AnticubeOh 19       | -1044.3919224       | 72.84         |

|    |                            |               |        |
|----|----------------------------|---------------|--------|
| 40 | 12v-03-AnticubeOh 16       | -1044.3706218 | 86.21  |
| 41 | 12v-03-AnticubeOh 3_i-72   | -1044.3630151 | 90.98  |
| 42 | 12v-03-AnticubeOh 12_i-918 | -1044.3532037 | 97.14  |
| 43 | 12v-03-AnticubeOh 9        | -1044.3017890 | 129.40 |
